# Supplementary material for: Early-stage responses to Plasmodiophora brassicae at the transcriptome and metabolome levels in clubroot resistant and susceptible oilseed Brassica napus
Source: Royal Society of Chemistry journal article supplement (doi:10.1039/d2mo00251e), 2022-11-10
Supplement: d2mo00251e1.pdf [file d2mo00251e1.pdf]

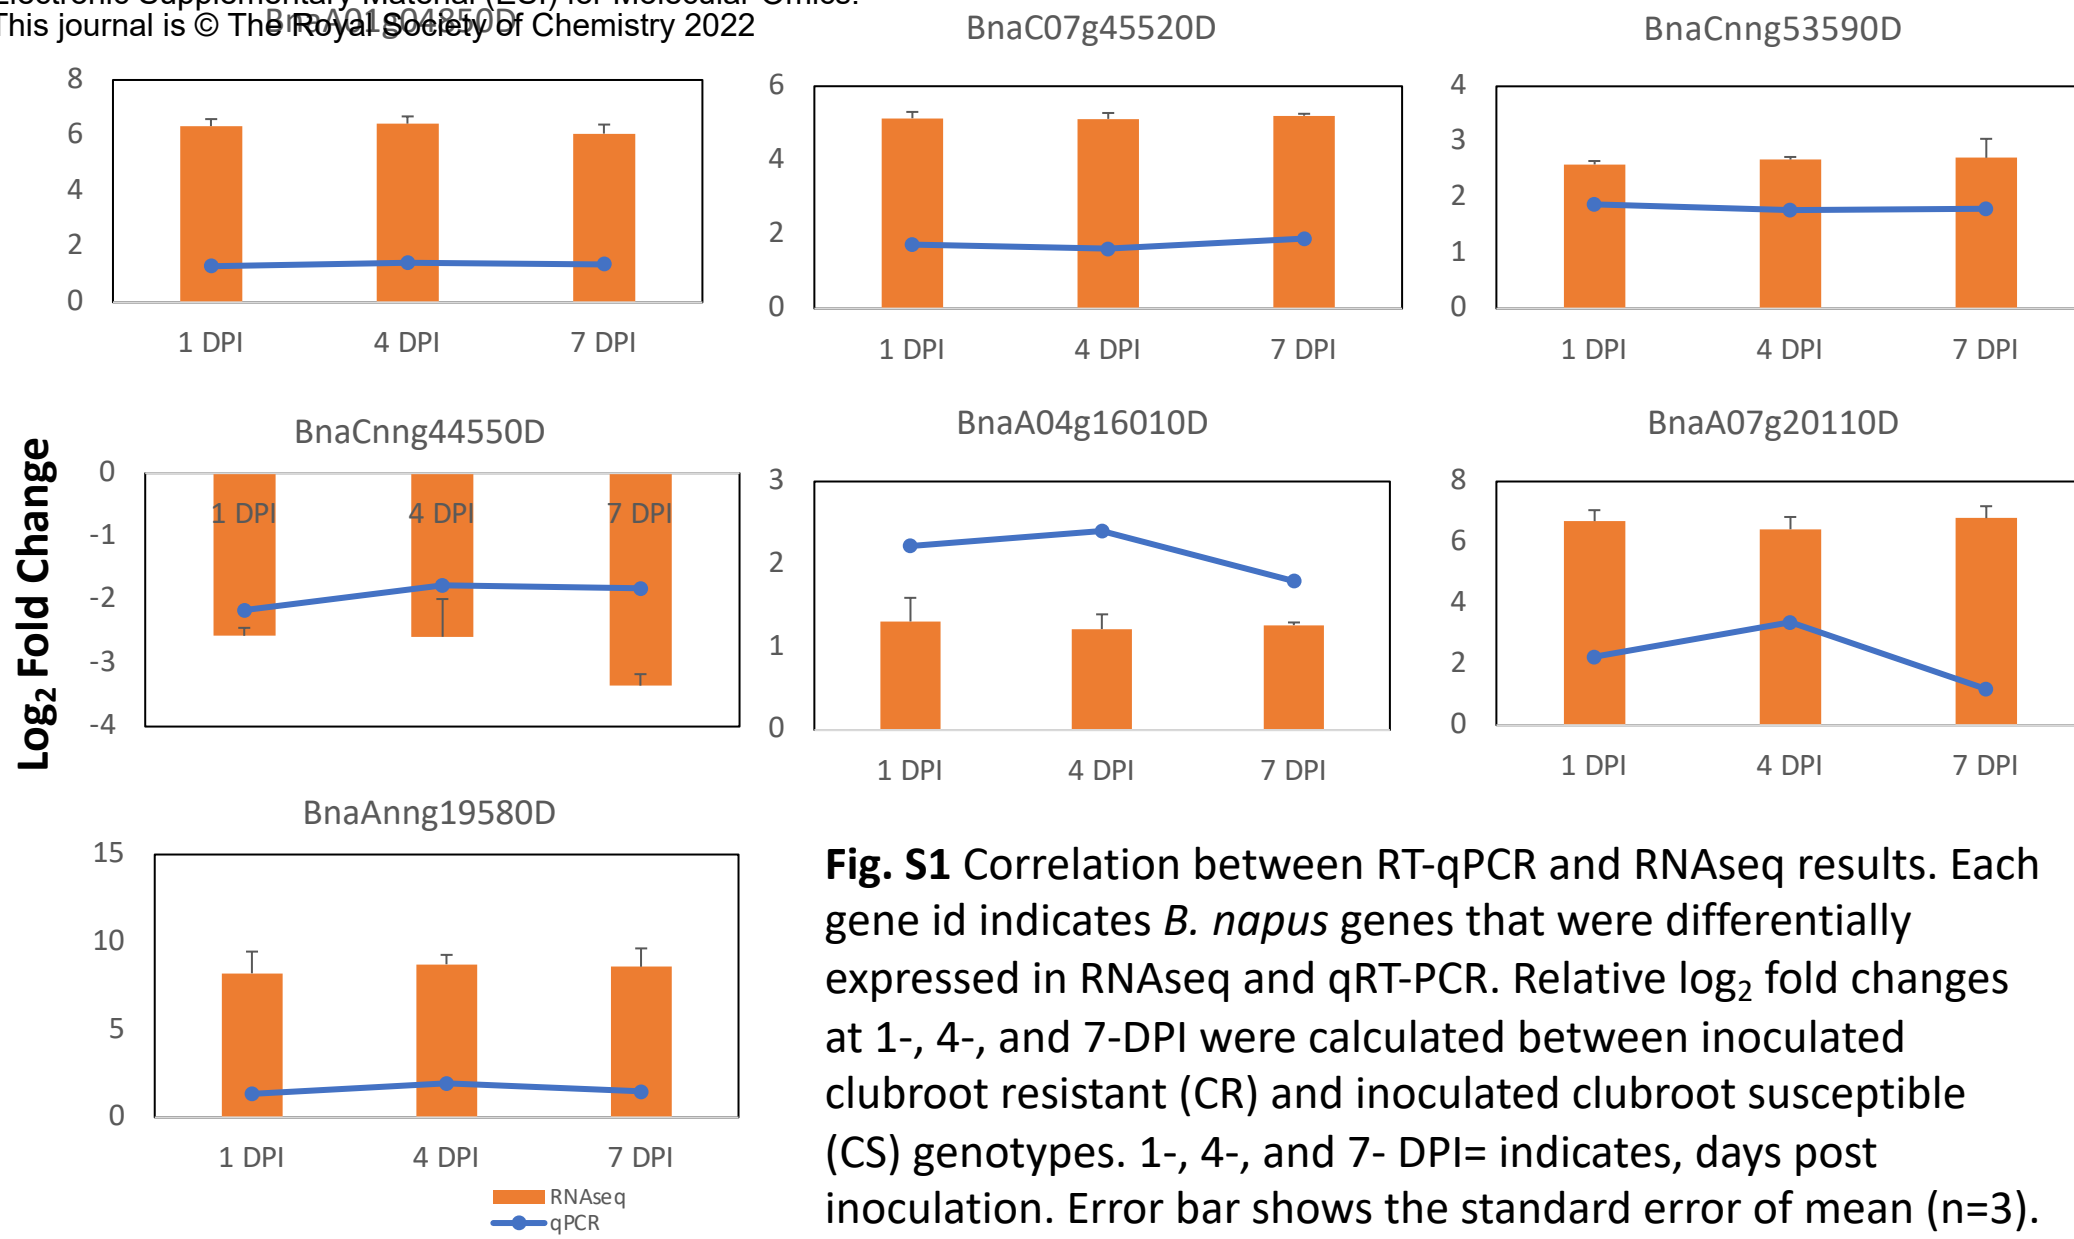

**Fig. S1** Correlation between RT-qPCR and RNAseq results. Each gene id indicates *B. napus* genes that were differentially expressed in RNAseq and qRT-PCR. Relative log<sub>2</sub> fold changes at 1-, 4-, and 7-DPI were calculated between inoculated clubroot resistant (CR) and inoculated clubroot susceptible (CS) genotypes. 1-, 4-, and 7- DPI= indicates, days post inoculation. Error bar shows the standard error of mean (n=3).
