# Supplementary material for: Early-stage responses to Plasmodiophora brassicae at the transcriptome and metabolome levels in clubroot resistant and susceptible oilseed Brassica napus
Source: Royal Society of Chemistry journal article supplement (doi:10.1039/d2mo00251e), 2022-11-10
Supplement: d2mo00251e3.pdf [file d2mo00251e3.pdf]

(a)

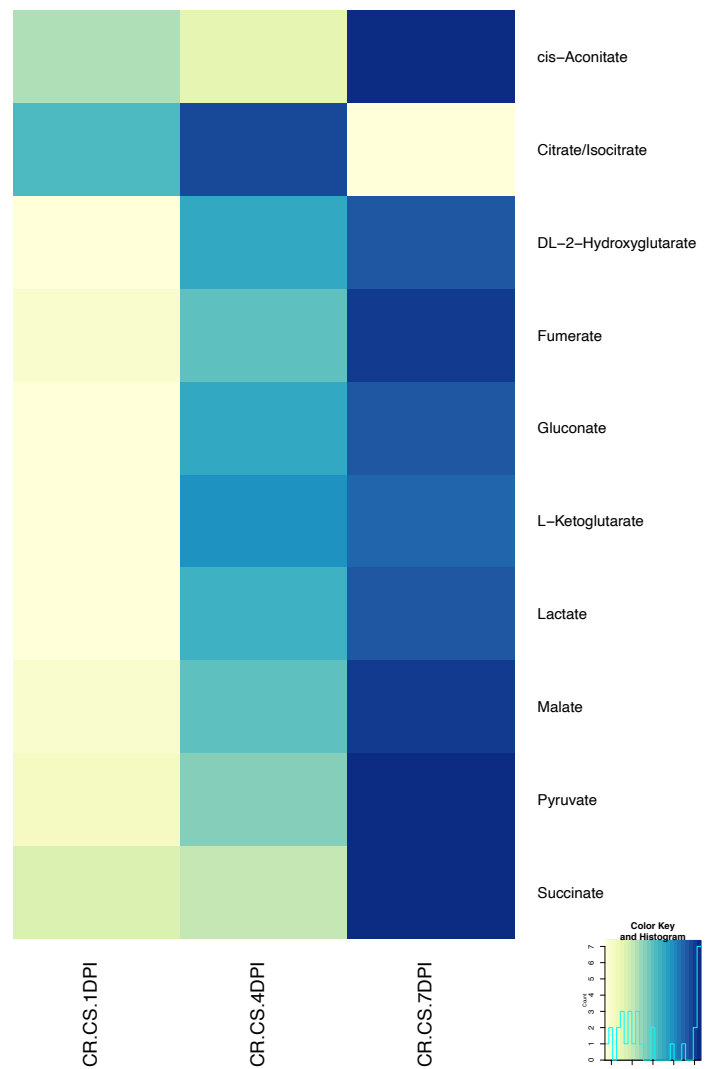

(b)

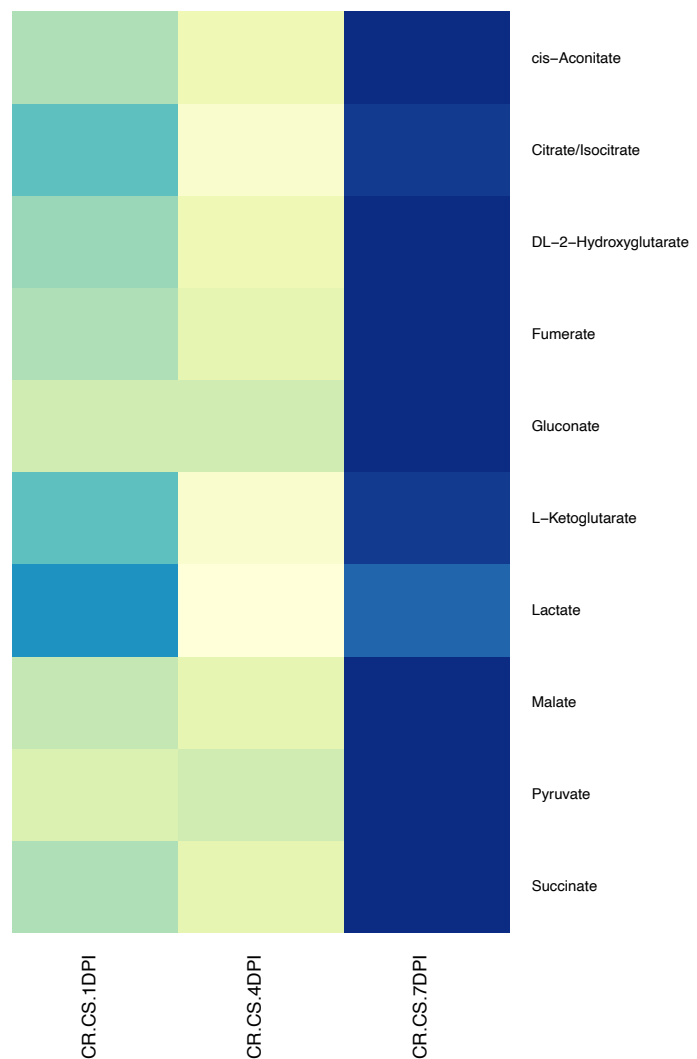

**Fig. S3** Organic acids-related metabolite accumulation at three different time points in uninoculated and pathogen inoculated root tissues of clubroot resistant (CR) and susceptible (CS) genotypes. Log<sub>2</sub> fold change between CR and CS were calculated at all three-time points and heatmaps were developed. Dark blue indicates higher accumulation and light green indicates low accumulation of metabolites in CR as compared to CS genotype. (a) Uninoculated group. (b) Inoculated group.
