# Supplementary material for: Early-stage responses to Plasmodiophora brassicae at the transcriptome and metabolome levels in clubroot resistant and susceptible oilseed Brassica napus
Source: Royal Society of Chemistry journal article supplement (doi:10.1039/d2mo00251e), 2022-11-10
Supplement: d2mo00251e9.xlsx [file d2mo00251e9.xlsx]

## Sheet: Sheet1
Table S10. RT-qPCR primers used in this study.
BnaAnng19580D_F	TCACAACCAATCTTCAGGAGTTA	PF12734:Cysteine-rich TM module stress tolerance
BnaAnng19580D_R	CTGGTCTCGACTTTAACAGGAG
BnaA01g04850D_F	GCGAGATTGACAAGGAAGAG	PF13833:EF hand domain pair
BnaA01g04850D_R	TTCAACCAAGCCACCATC
BnaA04g16010D_F	AACGGTCTTTGGCTGGAATATC	sp|Q94ID2|IPT5_ARATH Adenylate isopentenyltransferase 5
BnaA04g16010D_R	AGGATCTCTGTCGCTGGTTTA
BnaA07g20110D_F	TATCGGTGGAGTGTCAGAG	AT1G80840.1 Arabidopsis thaliana|WRKY|WRKY DNA-binding protein 40
BnaA07g20110D_R	TACGAGGGTAGTGTCAGAAG
BnaC07g45520D_F	GCGTGTGTTGAGCATAGT	PF13499:EF-hand domain pair|PF00069:Protein kinase domain
BnaC07g45520D_R	CTCATCGTCCTTCTTCCAAC
BnaCnng44550D_F	ATTGGCAGAGGACGATTC	Phosphoenolpyruvate carboxylase kinase 2
BnaCnng44550D_R	GCTCCGTCGTTATACACTC
BnaCnng53590D_F	GGTGTCAACGGATTTACC	P46267.1 RecName: Full=Fructose-1,6-bisphosphatase, cytosolic
BnaCnng53590D_R	CCCAGTTCTGAGCATTTC
UBC9_F	GACCAAAGTGTTCCATCCAAAC	Ubiquitin conjugating enzyme 9
UBC9_R	GATAGCAGCACCTTGGAGATAG
