# Supplementary material for: Early-stage responses to Plasmodiophora brassicae at the transcriptome and metabolome levels in clubroot resistant and susceptible oilseed Brassica napus
Source: Royal Society of Chemistry journal article supplement (doi:10.1039/d2mo00251e), 2022-11-10
Supplement: d2mo00251e10.xlsx [file d2mo00251e10.xlsx]

## Sheet: (A) Sugar
Table S11 A. Sugar related metabolites accumulation at three time points in response to the pathogen infection. In this case, comparisons were made between inoculated clubroot resistant (CR) and inoculated clubroot susceptible (CS) genotypes. Res1 = Resistant genotype at 1 day post inoculation, Res4 = Resistant genotype at 4 day post inoculation, and Res7 = Resistant genotype at 7 day post inocul…
Sugar Metabolites	Res1_TvsSus1_T_log2FoldChange	Res4_TvsSus4_T_log2FoldChange	Res7_TvsSus7_T_log2FoldChange
Fructose	-0.660561	-0.860026	1.28154
Glucose	0.0856741	-0.169265	1.95331
Hexose-3-phosphates	-0.455584	-0.906724	1.18098
Mannitol	5.10791	2.70916	5.36572
Ribose	0.0544805	1.23012	1.05962
Ribose-5-phosphate	0.796995	0.660135	0.983296
Sedoheptulose-7-phosphate	0.294644	0.174065	1.88962
Sucrose	0.0959264	-0.511294	2.001

## Sheet: (B) Organic acid
Table S11 B. Organic acid related metabolites accumulation in roots at three time points in response to the pathogen infection. In this case, comparisons were made between inoculated clubroot resistant (CR) and inoculated clubroot susceptible (CS) genotypes. Res1 = Resistant genotype at 1 day post inoculation, Res4 = Resistant genotype at 4 day post inoculation, and Res7 = Resistant genotype at 7…
Organic Acid	Res1_TvsSus1_T_log2FoldChange	Res4_TvsSus4_T_log2FoldChange	Res7_TvsSus7_T_log2FoldChange
cis-Aconitate	0.693657	0.0948406	2.54828
Citrate/Isocitrate	0.315088	-0.572535	1.15605
DL-2-Hydroxyglutarate	0.690604	0.152511	2.00818
Fumerate	0.382823	0.0848404	1.80275
Gluconate	0.275428	0.288064	2.08237
L-Ketoglutarate	0.975289	-0.842055	2.64298
Lactate	0.772327	-1.41168	1.10605
Malate	0.387015	0.102019	1.95565
Pyruvate	0.467596	0.542948	2.49515
Succinate	0.338785	-0.0054733	1.78338

## Sheet: (C) Amino acid
Table S11 C. Amino acid and derivatives related metabolite accumulation at three time points in response to the pathogen infection. In this case, comparisons were made between inoculated clubroot resistant (CR) and inoculated clubroot susceptible (CS) genotypes. Res1 = Resistant genotype at 1 day post inoculation, Res4 = Resistant genotype at 4 day post inoculation, and Res7 = Resistant genotype …
Amino acids	Res1_TvsSus1_T_log2FoldChange	Res4_TvsSus4_T_log2FoldChange	Res7_TvsSus7_T_log2FoldChange
Alanine	-0.0506456	-0.622595	1.09198
Asparagine	0.689002	0.282203	1.48103
Aspartate	0.593959	0.463621	1.22104
Betaine	0.838171	0.374684	1.401
Citruline	-0.115873	-0.752536	1.06024
Glutamine	0.39264	0.267459	1.00595
Glutathione	0.413156	0.00925694	1.23305
Histidine	0.855932	-1.15425	1.09186
Homoserine	0.453919	0.0938328	1.02459
Isoeucine	0.679512	-0.0960959	1.72632
Kynurenine	0.061022	-0.338897	2.12323
L-Aminoadipate	0.583456	0.127067	1.76736
Leucine	0.503515	-0.229925	1.65453
Methionine	0.420247	0.0256371	1.55746
Phenylalanine	-0.144553	-1.08072	1.98148
Proline	-0.253	0.00287999	1.64148
S-adenosyl-homocysteine	0.481128	0.312934	1.89091
Sarcosine	0.560277	-0.602816	1.19704
Serine	0.54347	-0.573454	1.58722
Threonine	-0.229429	-0.0533179	1.42427
Tryptophan	0.457183	0.278066	1.62696
Tyrosine	-0.185621	-0.631406	2.06855
Valine	0.761042	0.158741	1.95669

## Sheet: (D) Glucosinolate
Table S11 D. Glucosinolate related metabolites accumulation in roots at three time points in response to the pathogen infection. In this case, comparisons were made between inoculated clubroot resistant (CR) and inoculated clubroot susceptible (CS) genotypes. Res1 = Resistant genotype at 1 day post inoculation, Res4 = Resistant genotype at 4 day post inoculation, and Res7 = Resistant genotype at …
Glucosinolates	Res1_TvsSus1_T_log2FoldChange	Res4_TvsSus4_T_log2FoldChange	Res7_TvsSus7_T_log2FoldChange
4-hydroxyglucobrassicin	-2.57111	-4.59714	-0.92876
Glucobrassicin	-2.15526	-4.91858	-0.312757
Gluconapin	-3.95742	-7.40602	-0.566454
Gluconasturtiin	-2.15887	-5.2288	-1.21833
Neoglucobrassicin	-1.62083	-4.78963	-0.342208
Sinalbin	0	-7.22025	-1.51763
