# Supplementary material for: Early-stage responses to Plasmodiophora brassicae at the transcriptome and metabolome levels in clubroot resistant and susceptible oilseed Brassica napus
Source: Royal Society of Chemistry journal article supplement (doi:10.1039/d2mo00251e), 2022-11-10
Supplement: d2mo00251e11.xlsx [file d2mo00251e11.xlsx]

## Sheet: (E) Unique Genes
Table S2 E. Differentially expressed genes (DEGs) that are uniquely regulated in response to the pathogen treatment. In this case, comparisons were made between inoculated clubroot resistant (CR) and inoculated clubroot susceptible (CS) genotypes. Res1 = Resistant genotype at 1 day post inoculation, Res4 = Resistant genotype at 4 day post inoculation, and Res7 = Resistant genotype at 7 day post i…
gene_id	Res1_TvsSus1_T_log2FoldChange	Res1_TvsSus1_T_pvalue	Res1_TvsSus1_T_padj	Res4_TvsSus4_T_log2FoldChange	Res4_TvsSus4_T_pvalue	Res4_TvsSus4_T_padj	Res7_TvsSus7_T_log2FoldChange	Res7_TvsSus7_T_pvalue	Res7_TvsSus7_T_padj	gene_description
BnaA01g00780D	3.24251	0.000122327	0.00136628	2.80553	0.000151733	0.00223692	2.39766	0.00198273	0.021396	PF06405:Red chlorophyll catabolite reductase (RCC reductase)
BnaA01g00960D	1.52699	7.18879e-08	1.42549e-06	1.59185	0.00120047	0.0140972	2.06445	3.19905e-06	6.61952e-05	PF14009:Domain of unknown function (DUF4228)
BnaA01g00980D	2.69418	4.07889e-10	1.13583e-08	2.19006	0.00261472	0.0277853	2.9093	8.92681e-07	2.06292e-05	PF05920:Homeobox KN domain|PF07526:Associated with HOX
BnaA01g01280D	1.34791	4.46501e-07	7.83907e-06	1.34352	0.00195714	0.0216003	1.43615	2.25752e-09	8.01535e-08	PF00141:Peroxidase
BnaA01g01910D	1.03823	0.00322077	0.0250404	1.26427	6.45208e-05	0.00103405	1.06441	0.000424527	0.00547953	O81788.1 RecName: Full=WUSCHEL-related homeobox 13 && PF00046:Homeobox domain
BnaA01g02570D	1.15124	0.000300088	0.00305613	1.51905	0.000416929	0.00550764	1.65298	9.41928e-05	0.00142382	PF00170:bZIP transcription factor
BnaA01g03730D	1.00606	6.86816e-05	0.000804421	1.15732	0.00304448	0.0316994	1.11478	0.000557887	0.00698675	PF06941:5' nucleotidase, deoxy (Pyrimidine), cytosolic type C protein (NT5C)
BnaA01g04150D	1.49172	1.10334e-12	4.40705e-11	1.76714	0.000670159	0.00843395	1.27966	0.000570695	0.00713029	PF00847:AP2 domain
BnaA01g04230D	-3.1998	0.00382244	0.0290983	-3.10607	2.41228e-06	5.17006e-05	-3.45997	7.69207e-10	2.96654e-08	PF08777:RNA binding motif
BnaA01g05900D	1.17953	3.76711e-06	5.61162e-05	1.53098	0.00477256	0.046457	1.54716	0.000197423	0.00276137	PF02485:Core-2/I-Branching enzyme
BnaA01g06090D	2.08314	1.16197e-06	1.88478e-05	2.02794	7.90474e-05	0.00124506	2.18281	0.0041581	0.0401235	PF00847:AP2 domain|PF03099:Biotin/lipoate A/B protein ligase family
BnaA01g06610D	1.24011	4.72352e-07	8.25551e-06	1.52108	0.00083382	0.0102493	1.63704	0.000652925	0.00802349	PF16363:GDP-mannose 4,6 dehydratase
BnaA01g08760D	2.75188	1.82327e-07	3.41069e-06	1.73805	0.00264467	0.0280385	1.73122	0.000116089	0.00172219	Q8H100.1 RecName: Full=Probable ADP-ribosylation factor GTPase-activating protein AGD8; Short=ARF GAP AGD8; AltName: Full=Protein ARF-GAP DOMAIN 8; Short=AtAGD8 && PF01412:Putative GTPase activating protein for Arf
BnaA01g24460D	4.551	4.42361e-19	3.7587e-17	3.57991	8.66796e-06	0.000166858	4.12541	4.36778e-10	1.75483e-08	PF00447:HSF-type DNA-binding
BnaA01g24510D	1.48368	9.47404e-09	2.15095e-07	1.35065	0.0023066	0.0249005	1.28291	0.00440324	0.0421358	PF07765:KIP1-like protein
BnaA01g25330D	1.82296	1.22824e-08	2.73771e-07	1.98351	1.08481e-05	0.000205653	1.14424	0.00197469	0.021319	PF13883:Pyridoxamine 5'-phosphate oxidase
BnaA01g26810D	2.26061	9.01383e-07	1.49944e-05	1.98259	2.97029e-05	0.000514096	2.35153	3.2622e-07	8.17633e-06	PF07797:Protein of unknown function (DUF1639)
BnaA01g28120D	2.15288	8.45049e-24	1.11553e-21	1.39474	0.000659049	0.00830937	1.55286	0.00115169	0.0133183	Q41951.2 RecName: Full=Aquaporin TIP2-1; AltName: Full=Delta-tonoplast intrinsic protein; Short=Delta-TIP; AltName: Full=Tonoplast intrinsic protein 2-1; Short=AtTIP2;1; Contains: RecName: Full=Aquaporin TIP2-1, N-terminally processed && PF00230:Major intrinsic protein
BnaA01g28180D	5.87719	0.000141274	0.00155361	4.99441	0.00390798	0.0392376	5.21107	0.0018432	0.020116	PF03638:Tesmin/TSO1-like CXC domain, cysteine-rich domain
BnaA01g32070D	-1.12738	4.43883e-06	6.53265e-05	-1.35227	0.00010031	0.0015407	-1.41717	6.08517e-05	0.000962512	PF13920:Zinc finger, C3HC4 type (RING finger)
BnaA01g32230D	-1.06135	1.30248e-06	2.09516e-05	-1.03864	0.00158156	0.0179073	-1.11797	0.000294338	0.00396758	Q80Y75.1 RecName: Full=DnaJ homolog subfamily B member 13; AltName: Full=Testis and spermatogenesis cell-related protein 6; AltName: Full=Testis spermatocyte apoptosis-related gene 6 protein; AltName: Full=Testis spermatogenesis apoptosis-related gene 3 protein; AltName: Full=Testis spermatogenesis apoptosis-related gene 6 protein && PF00226:DnaJ domain|PF01556:DnaJ C terminal domain
BnaA01g32320D	-1.61623	1.36417e-11	4.6518e-10	-1.5343	7.37995e-08	2.08247e-06	-1.35963	1.89004e-06	4.09677e-05	PF00179:Ubiquitin-conjugating enzyme
BnaA01g33120D	1.28067	2.04558e-06	3.18832e-05	1.48434	0.000169984	0.0024804	1.30266	1.05699e-05	0.000198638	P53492.1 RecName: Full=Actin-7; AltName: Full=Actin-2 && PF00022:Actin|PF10250:GDP-fucose protein O-fucosyltransferase
BnaA01g34500D	1.95859	3.02466e-09	7.45733e-08	2.00638	2.97505e-05	0.000514791	2.41858	1.46127e-05	0.00026504	PF04564:U-box domain
BnaA01g34700D	1.45416	0.000653756	0.00614605	1.74915	0.000298337	0.00408168	1.53646	0.000453058	0.00580723	F4JJ23.1 RecName: Full=Protein NEN4; AltName: Full=NAC45/NAC86-dependent exonuclease-domain protein 4 && PF00929:Exonuclease
BnaA01g34790D	1.36395	2.68394e-09	6.66205e-08	1.00043	7.92719e-05	0.00124802	1.64396	0.0001172	0.00173757	PF03106:WRKY DNA -binding domain|PF10533:Plant zinc cluster domain
BnaA01g36480D	-1.10522	4.69565e-05	0.00056732	-1.22633	3.28715e-05	0.000565232	-1.27679	7.64287e-05	0.00118331	PF04756:OST3 / OST6 family
BnaA02g01430D	1.41873	1.10617e-08	2.48469e-07	1.17382	0.00108203	0.012867	1.3054	0.00393258	0.0383125	PF01190:Pollen proteins Ole e I like
BnaA02g03500D	1.48317	0.00273467	0.0216697	1.89424	4.77359e-06	9.66634e-05	2.47103	3.80932e-05	0.000631849	Q9FFI2.1 RecName: Full=Autophagy protein 5; AltName: Full=Protein autophagy 5; Short=AtAPG5 && PF04106:Autophagy protein Apg5
BnaA02g03560D	1.75102	4.94019e-07	8.59539e-06	1.7932	1.86109e-05	0.000336103	2.08232	1.36205e-05	0.000248392	Q8NA75.1 RecName: Full=DDB1- and CUL4-associated factor 4-like protein 2; AltName: Full=WD repeat-containing protein 21C && -
BnaA02g03790D	1.6992	0.00441578	0.0329829	1.74582	0.00241819	0.0259542	2.35082	0.00452329	0.0431143	PF01582:TIR domain|PF07725:Leucine Rich Repeat|PF00931:NB-ARC domain
BnaA02g04070D	3.40323	2.37142e-08	5.07174e-07	2.92956	0.00398403	0.0399025	2.95244	0.00235928	0.0247991	PF00380:Ribosomal protein S9/S16
BnaA02g04230D	1.34042	4.88378e-08	9.93286e-07	1.20611	0.000987541	0.0118855	1.21134	2.7319e-06	5.74255e-05	PF00069:Protein kinase domain|PF13499:EF-hand domain pair
BnaA02g08400D	-1.6325	3.73968e-10	1.04892e-08	-1.50683	4.77689e-06	9.67017e-05	-1.23101	0.00218014	0.0232089	PF05553:Cotton fibre expressed protein|PF14364:Domain of unknown function (DUF4408)
BnaA02g08790D	3.92098	1.78753e-07	3.34832e-06	4.40421	0.000178701	0.00259162	3.79493	3.00706e-06	6.25356e-05	PF03737:Demethylmenaquinone methyltransferase
BnaA02g09590D	1.10548	0.00024829	0.00257566	1.34236	0.000173779	0.0025304	1.5826	0.0032513	0.0325477	Q9LSQ6.1 RecName: Full=Calcium-binding protein PBP1; AltName: Full=KIC-related protein 2; AltName: Full=PINOID-binding protein 1 && PF13833:EF-hand domain pair
BnaA03g00060D	-4.85695	0.00467809	0.0346654	-5.43716	0.000656757	0.00828352	-6.54105	0.000134075	0.00195554	PF13456:Reverse transcriptase-like
BnaA03g00360D	-1.57927	2.62234e-10	7.5248e-09	-1.56165	0.00043305	0.00570085	-1.27568	0.000263841	0.00359513	PF16041:Domain of unknown function (DUF4793)|PF13920:Zinc finger, C3HC4 type (RING finger)|PF16040:Domain of unknown function (DUF4792)
BnaA03g01810D	-1.73896	6.39017e-09	1.49361e-07	-1.69374	4.46672e-06	9.10405e-05	-1.79666	5.99783e-07	1.44254e-05	PF03208:PRA1 family protein
BnaA03g03560D	-1.76381	6.57369e-09	1.53496e-07	-1.43849	5.68616e-05	0.000925786	-1.49745	3.16728e-07	7.95832e-06	PF01058:NADH ubiquinone oxidoreductase, 20 Kd subunit
BnaA03g17620D	-4.06318	7.94771e-05	0.000919123	-5.1971	0.000591939	0.00754923	-6.7183	7.31172e-06	0.000141771	O80443.1 RecName: Full=GDSL esterase/lipase At2g38180; AltName: Full=Extracellular lipase At2g38180; Flags: Precursor && PF00657:GDSL-like Lipase/Acylhydrolase
BnaA03g21990D	3.33701	0.00498423	0.0365877	2.71611	0.00510065	0.0492639	2.87964	0.00195307	0.0211182	PF00106:short chain dehydrogenase
BnaA03g22610D	1.07346	0.000429574	0.00420288	1.40656	2.00992e-06	4.3705e-05	1.32954	7.70669e-06	0.000148854	PF00682:HMGL-like
BnaA03g23850D	-1.74573	0.000135277	0.00149356	-1.54871	0.000108163	0.00165061	-1.93289	9.26025e-05	0.00140219	PF00646:F-box domain
BnaA03g24790D	2.38562	0.000279008	0.00286236	2.41088	0.000854906	0.0104803	3.73919	0.000174367	0.00246639	Q9LDM5.1 RecName: Full=Putative cysteine-rich receptor-like protein kinase 31; Short=Cysteine-rich RLK31; Flags: Precursor && PF01657:Salt stress response/antifungal
BnaA03g31380D	1.30356	3.15493e-05	0.000394366	1.44202	0.00091839	0.0111451	1.7105	0.000504304	0.00637681	PF06964:Alpha-L-arabinofuranosidase C-terminus
BnaA03g32750D	2.32463	1.34459e-07	2.56551e-06	2.31808	0.00159223	0.0180103	2.02301	6.3242e-05	0.000996058	Q9FYB5.2 RecName: Full=Chaperone protein dnaJ 11, chloroplastic; Short=AtDjC11; Short=AtJ11; Flags: Precursor && PF00226:DnaJ domain
BnaA03g37440D	-6.55586	1.97224e-06	3.08287e-05	-5.07494	8.51804e-05	0.00132794	-5.40358	0.000178887	0.0025227	Q6Q1P4.2 RecName: Full=Structural maintenance of chromosomes protein 1; Short=SMC protein 1; Short=SMC-1; AltName: Full=Chromosome segregation protein SMC-1; AltName: Full=Cohesin complex subunit SMC-1; AltName: Full=Protein TITAN8 && PF02463:RecF/RecN/SMC N terminal domain|PF06470:SMC proteins Flexible Hinge Domain
BnaA03g46110D	4.89092	0.00105202	0.00938026	5.55353	2.64144e-05	0.000460665	7.53251	1.15637e-06	2.61129e-05	Q9LW86.1 RecName: Full=Probable sulfate transporter 3.4 && PF01740:STAS domain|PF00916:Sulfate permease family
BnaA04g02520D	-1.40064	4.05984e-06	6.00404e-05	-1.35615	6.18685e-05	0.000997312	-1.45284	0.00437946	0.0419426	PF01283:Ribosomal protein S26e
BnaA04g06510D	-3.40489	2.76223e-07	5.01944e-06	-3.81257	6.00078e-06	0.000119227	-2.74046	1.57135e-05	0.000283106	PF00255:Glutathione peroxidase
BnaA04g07660D	1.39008	4.16829e-05	0.00050872	1.28571	0.000281744	0.00387551	1.41332	0.000148679	0.0021445	Q60560.1 RecName: Full=DNA-binding protein SMUBP-2; AltName: Full=ATP-dependent helicase IGHMBP2; AltName: Full=Immunoglobulin mu-binding protein 2; AltName: Full=Insulin II gene enhancer-binding protein; AltName: Full=RIPE3B-binding complex 3B2 p110 subunit; Short=RIP-1 && PF13087:AAA domain|PF13086:AAA domain
BnaA04g08030D	-3.48726	5.47133e-07	9.43706e-06	-2.43181	0.00147223	0.0168108	-2.41575	0.00226677	0.0239821	PF08597:Translation initiation factor eIF3 subunit
BnaA04g08280D	-1.41246	5.23585e-11	1.65505e-09	-1.63106	1.01249e-05	0.000192849	-1.16356	0.000263017	0.00358459	PF00168:C2 domain
BnaA04g13710D	-6.9296	2.67889e-07	4.87899e-06	-6.58259	3.82387e-06	7.88275e-05	-4.95928	7.30425e-05	0.00113615	Q8LPK5.1 RecName: Full=Cellulose synthase A catalytic subunit 8 [UDP-forming]; Short=AtCesA8; AltName: Full=Protein IRREGULAR XYLEM 1; Short=AtIRX1; AltName: Full=Protein LEAF WILTING 2 && PF14569:Zinc-binding RING-finger
BnaA04g15490D	2.5165	3.49984e-17	2.43695e-15	2.70512	3.33186e-07	8.29953e-06	2.35402	4.04215e-12	2.22648e-10	PF00069:Protein kinase domain|PF08263:Leucine rich repeat N-terminal domain|PF13855:Leucine rich repeat
BnaA04g16530D	1.10794	9.7884e-07	1.61289e-05	1.07303	0.00497777	0.0482151	1.21629	2.61603e-05	0.000450297	F4IIS5.1 RecName: Full=Kinesin-like protein KIN-5A; AltName: Full=AtKRP125c; AltName: Full=Protein LOOPHOLE; AltName: Full=Protein RADIALLY SWOLLEN 7 && PF00225:Kinesin motor domain
BnaA04g21330D	-1.95051	4.70924e-08	9.60029e-07	-1.52081	0.000259228	0.00359826	-1.51032	0.00138661	0.0156806	PF13041:PPR repeat family
BnaA04g21780D	1.60496	3.8671e-09	9.34594e-08	1.59975	0.000133497	0.0019916	1.21386	0.00338601	0.0336583	Q38944.2 RecName: Full=Steroid 5-alpha-reductase DET2; Short=AtDET2; AltName: Full=Protein COMPACT ROSETTE 1; AltName: Full=Protein DEETIOLATED 2 && PF02544:3-oxo-5-alpha-steroid 4-dehydrogenase
BnaA04g21860D	5.81165	0.000182488	0.00195233	5.27316	0.00266948	0.0282709	5.28117	0.0014794	0.0166129	O80443.1 RecName: Full=GDSL esterase/lipase At2g38180; AltName: Full=Extracellular lipase At2g38180; Flags: Precursor && PF00657:GDSL-like Lipase/Acylhydrolase
BnaA04g22080D	3.45196	3.90652e-11	1.25361e-09	3.9261	7.61994e-07	1.77564e-05	4.6159	2.60681e-10	1.08972e-08	Q42641.1 RecName: Full=Non-specific lipid-transfer protein A; Short=LTP A; AltName: Full=Wax-associated protein 9A; Flags: Precursor && PF00234:Protease inhibitor/seed storage/LTP family
BnaA04g23210D	4.8913	0.000721171	0.00670387	6.90879	7.13996e-07	1.66832e-05	4.28109	0.00126203	0.0144454	PF11883:Domain of unknown function (DUF3403)|PF00954:S-locus glycoprotein domain|PF08276:PAN-like domain|PF07714:Protein tyrosine kinase|PF01453:D-mannose binding lectin
BnaA04g25000D	-3.8595	9.43193e-30	1.86234e-27	-4.1175	3.35648e-12	1.93078e-10	-3.46486	8.79411e-11	3.96407e-09	PF13499:EF-hand domain pair
BnaA04g25190D	2.98445	1.3705e-06	2.19848e-05	1.99942	4.47179e-05	0.000746124	2.6122	2.20516e-05	0.000386104	PF00537:Scorpion toxin-like domain
BnaA04g27940D	-5.17344	0.00174805	0.0146741	-6.50822	3.18152e-05	0.000548443	-5.27559	0.00138219	0.0156406	O81291.1 RecName: Full=L-type lectin-domain containing receptor kinase IV.4; Short=LecRK-IV.4; Flags: Precursor && PF00139:Legume lectin domain|PF00069:Protein kinase domain
BnaA05g02210D	1.40085	3.25109e-05	0.000405078	1.21559	0.00401149	0.0401267	1.48249	0.000111709	0.00166388	PF06232:Embryo-specific protein 3, (ATS3)
BnaA05g02400D	-1.84525	5.50127e-06	7.97666e-05	-1.85008	0.00036684	0.00491982	-1.65268	0.00032764	0.00437783	PF03942:DTW domain
BnaA05g03840D	-1.76686	0.00138618	0.0119753	-5.38611	1.1073e-05	0.000209279	-4.2414	2.79077e-05	0.000475943	PF14365:Domain of unknown function (DUF4409)|PF03080:Domain of unknown function (DUF239)
BnaA05g04810D	-3.08476	0.000468766	0.00455119	-3.56497	0.000425888	0.0056141	-2.5144	0.00301206	0.0305288	PF10248:Myelodysplasia-myeloid leukemia factor 1-interacting protein
BnaA05g07800D	1.27027	2.51141e-05	0.00032001	1.35864	0.00471299	0.0459292	1.44444	0.000405313	0.00526539	PF15629:Permuted single zf-CXXC unit|PF15628:RRM in Demeter
BnaA05g12830D	-5.09898	0.00248542	0.0199739	-5.43141	0.000642243	0.00811985	-5.04236	0.00478688	0.0453131	Q5XIY2.1 RecName: Full=Transmembrane protein 56-B && PF03798:TLC domain
BnaA05g28390D	1.78651	1.92553e-07	3.58561e-06	1.90489	2.21936e-06	4.77748e-05	1.4606	0.00383764	0.0375158	PF00450:Serine carboxypeptidase
BnaA05g31010D	1.29906	5.76541e-11	1.81176e-09	1.27226	0.00051223	0.00661753	1.60555	3.91829e-07	9.69959e-06	PF12906:RING-variant domain
BnaA05g31580D	1.30309	0.0027594	0.0218383	1.53769	0.00436043	0.0430064	1.80434	0.000126831	0.00186229	PF04043:Plant invertase/pectin methylesterase inhibitor|PF01095:Pectinesterase
BnaA05g31800D	2.41346	0.000829328	0.00758784	2.49123	0.000302103	0.00412498	3.06984	1.18642e-06	2.67569e-05	PF00083:Sugar (and other) transporter
BnaA05g31970D	2.5227	1.49599e-06	2.38769e-05	1.9225	4.59722e-05	0.00076408	1.4836	0.00287607	0.0293624	Q9MAA1.1 RecName: Full=GDSL esterase/lipase At3g05180; AltName: Full=Extracellular lipase At3g05180; Flags: Precursor && PF00657:GDSL-like Lipase/Acylhydrolase
BnaA05g32300D	1.15635	2.26391e-10	6.5611e-09	1.49727	7.97024e-06	0.000154466	1.80187	8.21946e-09	2.68236e-07	PF03552:Cellulose synthase|PF14570:RING/Ubox like zinc-binding domain
BnaA05g32970D	1.37094	5.59632e-05	0.000666319	1.32556	7.05014e-05	0.00111918	1.38134	8.62941e-05	0.00131703	PF00646:F-box domain|PF08268:F-box associated domain
BnaA05g33490D	1.83096	4.46932e-09	1.06975e-07	1.18517	0.000694718	0.00870789	1.31025	0.00121008	0.0139201	PF01569:PAP2 superfamily
BnaA05g33510D	1.11331	1.40203e-09	3.62602e-08	1.38844	0.000309095	0.00420622	1.39194	3.18597e-07	7.9967e-06	Q9SDM8.1 RecName: Full=S-adenosylmethionine decarboxylase proenzyme 3; Short=AdoMetDC 3; Short=SAMDC 3; Contains: RecName: Full=S-adenosylmethionine decarboxylase 3 alpha chain; Contains: RecName: Full=S-adenosylmethionine decarboxylase 3 beta chain; Flags: Precursor && PF01536:Adenosylmethionine decarboxylase
BnaA05g34260D	1.36693	0.00120852	0.0105968	2.38005	0.000409822	0.00542734	1.76748	0.00445832	0.0426042	PF00311:Phosphoenolpyruvate carboxylase
BnaA06g01420D	-1.36037	0.00688193	0.0482081	-2.0368	0.00202634	0.0222388	-2.29992	0.00214092	0.0228641	PF00657:GDSL-like Lipase/Acylhydrolase
BnaA06g06880D	2.75835	1.06721e-05	0.000145967	2.24831	0.00404601	0.0404047	2.55761	2.66831e-05	0.000457838	PF05212:Protein of unknown function (DUF707)
BnaA06g07000D	-4.38879	1.45461e-25	2.20886e-23	-3.4468	2.7517e-09	9.94934e-08	-3.66212	1.42598e-08	4.49282e-07	Q9SXB8.3 RecName: Full=G-type lectin S-receptor-like serine/threonine-protein kinase At1g11330; Flags: Precursor && PF00954:S-locus glycoprotein domain|PF07714:Protein tyrosine kinase|PF01453:D-mannose binding lectin|PF08276:PAN-like domain
BnaA06g14600D	-1.08553	0.00403745	0.0304689	-1.67438	0.000248947	0.00346747	-1.59595	0.00435967	0.0417872	PF13307:Helicase C-terminal domain|PF06733:DEAD_2
BnaA06g14870D	2.23415	3.47479e-07	6.2069e-06	3.0229	0.00515865	0.0497426	4.06798	2.46988e-05	0.000426919	PF04258:Signal peptide peptidase
BnaA06g21900D	2.75777	0.00147286	0.0126209	2.57486	0.00126048	0.0147161	3.24685	8.68411e-05	0.0013238	PF00249:Myb-like DNA-binding domain
BnaA06g24410D	1.28948	0.000411294	0.00404619	1.67333	0.00262057	0.0278389	1.28934	0.000510489	0.00644423	PF07714:Protein tyrosine kinase
BnaA06g25370D	-1.30611	0.000300405	0.00305801	-1.39912	0.00152594	0.0173462	-1.48996	1.33122e-08	4.22076e-07	Q9SI15.1 RecName: Full=bZIP transcription factor 2; Short=AtbZIP2; AltName: Full=G-box-binding factor 5; AltName: Full=Protein FLORAL TRANSITION AT THE MERISTEM 3 && PF00170:bZIP transcription factor
BnaA06g30810D	1.15698	4.93666e-05	0.00059448	1.15312	0.00354503	0.0360683	1.33997	3.22697e-05	0.000542949	Q94F39.1 RecName: Full=Ninja-family protein AFP3; AltName: Full=ABI five-binding protein 3; Short=ABI5-binding protein 3 && PF16135:TPL-binding domain in jasmonate signalling|PF16136:Putative nuclear localisation signal|PF07897:Ethylene-responsive binding factor-associated repression
BnaA06g32330D	-2.25796	1.34873e-07	2.57271e-06	-2.46134	2.43616e-06	5.21148e-05	-2.13954	4.25276e-05	0.00069929	Q41001.1 RecName: Full=Blue copper protein; Flags: Precursor && PF02298:Plastocyanin-like domain
BnaA06g35750D	-6.2807	2.7631e-06	4.19765e-05	-7.08643	7.88355e-05	0.00124229	-5.6964	0.00113968	0.0131902	PF14547:Hydrophobic seed protein
BnaA06g37040D	1.07553	1.1975e-06	1.93746e-05	1.02327	2.69865e-05	0.000469925	1.06284	0.000609646	0.00755607	Q9FMN4.1 RecName: Full=Thioredoxin-like protein Clot; AltName: Full=Thioredoxin Clot; Short=AtClot && PF06110:Eukaryotic protein of unknown function (DUF953)
BnaA06g40530D	-3.96984	3.08981e-05	0.000386851	-4.01514	0.000239072	0.00334623	-3.58061	5.15675e-06	0.000102855	Q9SVA0.1 RecName: Full=F-box/kelch-repeat protein At4g39580 && PF00646:F-box domain|PF01344:Kelch motif
BnaA07g03500D	6.65863	2.20647e-06	3.41682e-05	5.83779	6.65388e-05	0.00106366	7.13552	8.3602e-07	1.94414e-05	PF13839:GDSL/SGNH-like Acyl-Esterase family found in Pmr5 and Cas1p|PF14416:PMR5 N terminal Domain
BnaA07g15250D	-5.86168	7.15088e-05	0.000834868	-5.5327	0.00076912	0.00953253	-5.58873	0.000385926	0.00504621	PF01529:DHHC palmitoyltransferase
BnaA07g15870D	-5.96031	0.000143342	0.00157387	-5.53075	0.00185392	0.0205953	-5.29956	0.00143992	0.0162032	Q93Z32.1 RecName: Full=Signal peptide peptidase-like 1; Short=AtSPPL1 && PF04258:Signal peptide peptidase
BnaA07g20240D	5.63031	0.000359562	0.00359098	5.09725	0.00508863	0.0491849	5.13698	0.00351462	0.0347989	PF00069:Protein kinase domain
BnaA07g20380D	-1.2269	4.95275e-05	0.000596315	-1.5089	0.00208866	0.0228207	-1.42767	0.00490326	0.0461659	PF00656:Caspase domain
BnaA07g20740D	-1.46427	1.99271e-08	4.29739e-07	-1.43806	0.00358343	0.0364051	-1.42708	0.00129766	0.0148037	PF11152:Protein of unknown function (DUF2930)
BnaA07g22270D	-1.26236	6.91805e-09	1.60944e-07	-1.1443	4.41819e-06	9.01048e-05	-1.06248	1.57938e-05	0.000284479	PF05637:galactosyl transferase GMA12/MNN10 family
BnaA07g22690D	4.43046	0.00420818	0.0315931	5.82222	0.000234033	0.00328643	6.99667	5.16217e-07	1.25488e-05	PF01852:START domain|PF00046:Homeobox domain
BnaA07g24880D	5.69434	0.000943329	0.00850693	8.75359	3.52249e-12	2.01782e-10	9.25821	0.000109202	0.00162827	PF00305:Lipoxygenase
BnaA07g28640D	2.07708	6.16314e-09	1.44491e-07	2.84306	2.5471e-08	7.83143e-07	2.63845	9.46027e-08	2.58315e-06	O04533.1 RecName: Full=Putative L-type lectin-domain containing receptor kinase V.2; Short=Arabidopsis thaliana lectin-receptor kinase b1; Short=AthlecRK-b1; Short=LecRK-V.2; Flags: Precursor && PF00139:Legume lectin domain|PF00069:Protein kinase domain
BnaA07g37960D	-1.51141	0.000167392	0.00181084	-1.06763	0.00209013	0.0228257	-1.34684	0.00107729	0.0125343	PF03145:Seven in absentia protein family
BnaA07g38490D	5.23542	2.24258e-09	5.61854e-08	4.42559	0.000108315	0.00165257	4.51602	9.9788e-10	3.78811e-08	PF10513:Enhancer of polycomb-like
BnaA08g01210D	1.31517	1.89767e-07	3.53751e-06	1.09696	1.6557e-06	3.66412e-05	1.29548	1.47545e-05	0.000267284	PF00085:Thioredoxin|PF13414:TPR repeat
BnaA08g01300D	2.41876	8.32283e-22	9.16432e-20	2.48578	2.38716e-07	6.11958e-06	2.39265	1.16774e-07	3.13252e-06	O80340.1 RecName: Full=Ethylene-responsive transcription factor 4; Short=AtERF4; AltName: Full=Ethylene-responsive element-binding factor 4; Short=EREBP-4; AltName: Full=Protein RELATED TO APETALA2 5 && PF00847:AP2 domain
BnaA08g02870D	1.33785	4.12001e-05	0.000503092	1.5905	0.00139303	0.0160615	1.55573	0.00135364	0.0153677	PF02705:K+ potassium transporter
BnaA08g03510D	1.12774	0.00270179	0.0214604	1.4104	0.00137764	0.0158947	1.89617	2.43543e-05	0.000421483	PF08285:Dolichol-phosphate mannosyltransferase subunit 3 (DPM3)
BnaA08g03720D	1.61789	2.00781e-10	5.87014e-09	1.63622	8.03101e-05	0.00126089	1.49894	0.00227389	0.0240418	PF01490:Transmembrane amino acid transporter protein
BnaA08g03910D	2.77539	3.23996e-05	0.000403909	2.86199	0.00111065	0.0131617	2.78151	0.000253291	0.00346213	PF01554:MatE
BnaA08g06910D	-6.25731	1.00037e-05	0.000137716	-5.60564	0.000313464	0.00425891	-5.7829	0.000175814	0.00248285	PF00447:HSF-type DNA-binding
BnaA08g10990D	1.47035	4.24339e-09	1.01742e-07	1.66708	6.82625e-05	0.00108742	1.5958	7.56329e-07	1.77528e-05	O23141.1 RecName: Full=Arginine decarboxylase 2; Short=ADC 2; Short=ARGDC 2; AltName: Full=ADC-N && PF02784:Pyridoxal-dependent decarboxylase, pyridoxal binding domain
BnaA08g11450D	-1.82365	2.29821e-05	0.000294932	-1.78925	0.000176095	0.00256195	-1.94964	0.000198502	0.0027737	PF01336:OB-fold nucleic acid binding domain|PF00152:tRNA synthetases class II (D, K and N)|PF02938:GAD domain
BnaA08g12590D	5.28112	0.00334665	0.0259099	5.76898	0.000154733	0.00227625	5.79458	0.000335025	0.00446471	PF13639:Ring finger domain
BnaA08g17210D	1.99356	3.52323e-21	3.60601e-19	2.03521	0.000188075	0.00271266	2.29215	4.96678e-11	2.34937e-09	PF12695:Alpha/beta hydrolase family
BnaA08g17500D	2.82064	0.000204047	0.00216042	2.73379	0.000527146	0.00679488	2.16974	0.00372849	0.0366529	PF03634:TCP family transcription factor
BnaA08g18190D	1.3437	2.23025e-05	0.000286965	1.41874	7.03107e-05	0.00111667	1.67421	5.26172e-06	0.000104665	Q8GYB1.2 RecName: Full=Nudix hydrolase 15, mitochondrial; Short=AtNUDT15; AltName: Full=Coenzyme A diphosphatase NUDT15; Flags: Precursor && PF00293:NUDIX domain
BnaA08g19230D	-1.073	0.00477531	0.035292	-1.54649	0.00439308	0.043293	-1.55322	0.00478548	0.0453059	PF03331:UDP-3-O-acyl N-acetylglycosamine deacetylase
BnaA08g22390D	-7.2005	1.16505e-23	1.52639e-21	-4.72047	5.837e-10	2.36324e-08	-5.15008	1.32367e-07	3.52656e-06	F4ICD9.1 RecName: Full=Protein transport protein SEC31 homolog A; AltName: Full=SEC31-like protein A && PF12931:Sec23-binding domain of Sec16
BnaA08g23820D	-1.02732	0.000455442	0.0044379	-1.42203	6.02176e-05	0.000973955	-1.30679	0.000439977	0.00565712	PF04003:Dip2/Utp12 Family|PF00400:WD domain, G-beta repeat
BnaA08g24280D	-1.83914	0.00529063	0.0385527	-2.6738	0.00267158	0.0282889	-2.47591	0.000990013	0.0116384	Q9FMA1.1 RecName: Full=Pentatricopeptide repeat-containing protein At5g56310 && PF13041:PPR repeat family
BnaA08g24760D	3.08746	5.7771e-06	8.34536e-05	2.40699	0.000651522	0.00822504	2.80084	0.000137715	0.0020024	PF03311:Cornichon protein
BnaA08g24940D	2.51712	0.00184856	0.0154152	2.45682	0.000352961	0.00475227	3.26986	3.35277e-05	0.000562767	PF02115:RHO protein GDP dissociation inhibitor
BnaA08g26290D	-5.81677	8.63995e-05	0.000992753	-5.68181	0.000185046	0.00267234	-5.01219	0.00381558	0.037347	PF04678:Mitochondrial calcium uniporter
BnaA08g27120D	5.90832	2.50961e-05	0.000319897	4.90249	0.00107095	0.0127574	5.65511	4.79907e-05	0.00077801	PF03330:Rare lipoprotein A (RlpA)-like double-psi beta-barrel|PF01357:Pollen allergen
BnaA08g28130D	-1.50821	7.4205e-06	0.000104762	-1.20238	0.00264651	0.0280536	-1.59842	3.73788e-05	0.00062132	PF04438:HIT zinc finger
BnaA08g28290D	1.46006	0.000177003	0.00190036	2.32422	4.07135e-05	0.000684896	1.55444	0.000102647	0.00153771	PF03478:Protein of unknown function (DUF295)
BnaA08g31100D	-4.3659	2.78504e-21	2.87581e-19	-4.09119	8.22723e-08	2.30827e-06	-5.00308	4.0963e-08	1.19221e-06	PF00479:Glucose-6-phosphate dehydrogenase, NAD binding domain|PF02781:Glucose-6-phosphate dehydrogenase, C-terminal domain
BnaA09g01910D	1.57144	1.70945e-05	0.000224809	1.22585	0.000419869	0.00554328	1.19907	0.00261061	0.0270215	PF01165:Ribosomal protein S21
BnaA09g02460D	2.42194	3.67311e-06	5.47744e-05	1.27256	0.00301023	0.0313952	2.68529	2.7442e-07	6.95499e-06	PF13499:EF-hand domain pair
BnaA09g03000D	1.50162	3.45564e-06	5.16752e-05	2.26439	1.08121e-05	0.000205083	2.69759	6.80602e-08	1.8975e-06	Q9LV72.1 RecName: Full=Glutamate receptor 1.2; AltName: Full=Ligand-gated ion channel 1.2; Flags: Precursor && PF00060:Ligand-gated ion channel|PF00497:Bacterial extracellular solute-binding proteins, family 3|PF01094:Receptor family ligand binding region
BnaA09g04430D	2.60813	1.8454e-05	0.00024087	2.59276	8.9831e-06	0.000172633	2.26878	0.00238199	0.0249903	PF02309:AUX/IAA family
BnaA09g06790D	-1.5998	1.76129e-06	2.7793e-05	-1.64181	0.000748794	0.00930245	-1.98531	2.75625e-05	0.000470643	PF00925:GTP cyclohydrolase II|PF00926:3,4-dihydroxy-2-butanone 4-phosphate synthase
BnaA09g06950D	-1.07766	0.00019301	0.00205384	-1.35487	6.70269e-06	0.000132064	-1.44878	0.00249068	0.025983	A7IPQ1.1 RecName: Full=50S ribosomal protein L15 && PF00828:Ribosomal protein L18e/L15
BnaA09g07570D	-2.35106	8.96174e-05	0.00102634	-2.49834	0.000133691	0.00199406	-3.5791	0.000195132	0.00273149	PF02458:Transferase family
BnaA09g07650D	-1.71166	6.73024e-06	9.59496e-05	-1.73566	6.28876e-05	0.00101118	-1.68065	0.00338171	0.0336251	PF00326:Prolyl oligopeptidase family|PF02897:Prolyl oligopeptidase, N-terminal beta-propeller domain
BnaA09g07700D	-1.8923	4.04352e-09	9.74191e-08	-2.02075	1.6498e-10	7.34711e-09	-1.44133	6.35248e-05	0.00100029	Q9FKZ1.1 RecName: Full=Probable disease resistance protein At5g66900 && PF00931:NB-ARC domain|PF05659:Arabidopsis broad-spectrum mildew resistance protein RPW8
BnaA09g09230D	-1.3787	6.33776e-05	0.000747574	-1.35663	0.00383151	0.038577	-1.36292	0.000112812	0.00167889	PF13041:PPR repeat family|PF12854:PPR repeat
BnaA09g10770D	-1.67019	1.51962e-06	2.42154e-05	-2.12455	0.000155368	0.00228363	-1.39188	7.44943e-05	0.00115617	PF14299:Phloem protein 2
BnaA09g11730D	3.33864	3.60992e-05	0.000445487	2.67153	8.61255e-07	1.9867e-05	3.26909	8.33622e-05	0.00127715	PF01582:TIR domain|PF07725:Leucine Rich Repeat|PF00931:NB-ARC domain
BnaA09g19390D	-1.13709	0.00361793	0.0277536	-1.52774	0.00178267	0.0199279	-2.05649	5.04102e-06	0.00010072	PF00004:ATPase family associated with various cellular activities (AAA)
BnaA09g19840D	-2.99507	0.00293401	0.0230709	-2.86184	0.00417102	0.0414481	-3.43004	0.000412472	0.00534455	PF00132:Bacterial transferase hexapeptide (six repeats)
BnaA09g20810D	-2.39358	0.00349434	0.0269271	-3.66159	0.000101622	0.00155807	-2.39817	0.00510899	0.0478017	Q9SU25.1 RecName: Full=Transcription initiation factor IIF subunit alpha; Short=TFIIF-alpha; AltName: Full=General transcription factor IIF subunit 1; AltName: Full=Transcription initiation factor RAP74 homolog; Short=AtRAP74 && PF05793:Transcription initiation factor IIF, alpha subunit (TFIIF-alpha)
BnaA09g24450D	-1.43452	0.00119861	0.0105245	-1.35051	0.00126924	0.0148008	-1.43696	0.000425561	0.00549086	PF05739:SNARE domain|PF14523:Syntaxin-like protein
BnaA09g28900D	4.13786	2.5199e-05	0.000320915	2.98096	0.0015486	0.017566	3.23381	0.00205365	0.0220495	Q9FZC8.1 RecName: Full=Berberine bridge enzyme-like 7; Short=AtBBE-like 7; AltName: Full=Flavin-dependent oxidoreductase FOX5; Flags: Precursor && PF08031:Berberine and berberine like|PF01565:FAD binding domain
BnaA09g35550D	5.71339	6.09013e-12	2.17571e-10	3.22478	6.9721e-08	1.97632e-06	4.25789	4.02601e-08	1.17321e-06	PF00210:Ferritin-like domain
BnaA09g52520D	-6.22265	1.87698e-06	2.94585e-05	-3.65734	0.000131123	0.00195831	-4.28917	1.69792e-05	0.000303881	PF14693:Ribosomal protein TL5, C-terminal domain
BnaA10g01300D	2.41396	4.25689e-10	1.18257e-08	2.16316	0.00428348	0.0423693	3.29824	8.51815e-20	1.54579e-17	PF05553:Cotton fibre expressed protein
BnaA10g02280D	-3.3061	4.33253e-08	8.88692e-07	-3.36789	0.00245994	0.026361	-1.99475	0.000635807	0.00783508	Q54Y26.1 RecName: Full=Probable serine/threonine-protein kinase ndrA; AltName: Full=Nuclear DBF2-related kinase A && PF00069:Protein kinase domain
BnaA10g04100D	-5.94354	6.16374e-05	0.000728775	-5.78048	0.00180942	0.0201809	-5.62841	0.000415885	0.00538381	Q9XID0.1 RecName: Full=Putative 1-phosphatidylinositol-3-phosphate 5-kinase FAB1D; Short=Phosphatidylinositol 3-phosphate 5-kinase; AltName: Full=Phosphatidylinositol 3-phosphate 5-kinase type III; Short=PIPkin-III; Short=Type III PIP kinase; AltName: Full=Protein FORMS APLOID AND BINUCLEATE CELLS 1D && PF01504:Phosphatidylinositol-4-phosphate 5-Kinase
BnaA10g13150D	-1.23974	5.1737e-06	7.53778e-05	-1.96046	0.00248829	0.0266233	-1.60078	8.54686e-05	0.00130543	PF00139:Legume lectin domain
BnaA10g14110D	5.42991	0.000700912	0.0065321	6.74628	1.70753e-05	0.000310825	4.96875	0.000682669	0.00833794	Q9FMS7.1 RecName: Full=Transcription repressor OFP10; AltName: Full=Ovate family protein 10; Short=AtOFP10 && PF04844:Transcriptional repressor, ovate
BnaA10g18180D	-1.66747	7.54304e-06	0.00010632	-1.89216	0.000127721	0.00191417	-2.28543	4.58572e-05	0.000747044	Q9C942.1 RecName: Full=Caffeoylshikimate esterase; AltName: Full=Lysophospholipase 2; Short=LysoPL2 && PF12146:Serine aminopeptidase, S33
BnaA10g20360D	-1.87567	1.97862e-05	0.000256767	-1.92604	8.30816e-05	0.00129906	-2.10591	4.90356e-10	1.95333e-08	PF14009:Domain of unknown function (DUF4228)
BnaA10g20480D	-1.90819	3.27291e-08	6.85051e-07	-1.92128	7.43767e-08	2.09445e-06	-1.38788	0.000272442	0.00370084	Q9FMP4.1 RecName: Full=Splicing factor 3B subunit 6-like protein; AltName: Full=Pre-mRNA branch site p14-like protein && PF00076:RNA recognition motif. (a.k.a. RRM, RBD, or RNP domain)
BnaA10g29790D	1.98555	8.27188e-14	3.78066e-12	1.58398	0.000659386	0.00831209	1.96747	9.46223e-06	0.00017999	PF00462:Glutaredoxin
BnaA10g30070D	-3.95831	7.59705e-16	4.59249e-14	-4.10181	1.34703e-05	0.000250112	-3.87695	7.10239e-08	1.9723e-06	PF08263:Leucine rich repeat N-terminal domain
BnaAnng01920D	1.21235	5.94798e-06	8.56028e-05	1.45899	2.07915e-06	4.49975e-05	1.34068	0.00384567	0.0375737	PF00170:bZIP transcription factor|PF14144:Seed dormancy control
BnaAnng05930D	-1.86065	3.75591e-07	6.67823e-06	-1.53306	0.00421444	0.041813	-2.03934	5.22788e-06	0.000104185	PF02146:Sir2 family
BnaAnng07540D	-1.07008	0.000174752	0.00187905	-1.38687	0.000265969	0.00368437	-1.09846	0.00235914	0.0247991	PF12327:FtsZ family, C-terminal domain|PF00091:Tubulin/FtsZ family, GTPase domain
BnaAnng10170D	-3.58423	0.00277451	0.0219529	-3.65539	0.00126467	0.0147601	-5.72849	0.000668207	0.00818694	PF05558:DREPP plasma membrane polypeptide
BnaAnng12370D	6.82842	4.21287e-07	7.42633e-06	4.75924	0.000126915	0.00190334	4.044	0.000372297	0.00489169	PF06364:Protein of unknown function (DUF1068)
BnaAnng17950D	1.2636	0.00257796	0.0206107	1.29264	0.00320615	0.0330815	1.37815	0.00275189	0.0282706	PF03330:Rare lipoprotein A (RlpA)-like double-psi beta-barrel|PF01357:Pollen allergen
BnaAnng17970D	1.53527	1.10838e-07	2.14178e-06	1.65693	2.13716e-05	0.00038194	2.01826	3.68734e-08	1.08623e-06	PF01357:Pollen allergen|PF03330:Rare lipoprotein A (RlpA)-like double-psi beta-barrel
BnaAnng19980D	-1.95377	2.4581e-05	0.000313605	-1.51977	0.000185912	0.00268259	-2.3699	1.30464e-07	3.47718e-06	PF00550:Phosphopantetheine attachment site
BnaAnng22650D	1.28157	3.37868e-05	0.000419626	1.48729	0.00129237	0.0150323	1.40479	0.000831417	0.00996069	PF01842:ACT domain
BnaAnng23340D	-1.54594	4.49829e-06	6.61317e-05	-1.98405	0.00197056	0.0217309	-1.43611	3.36746e-05	0.000564693	PF00383:Cytidine and deoxycytidylate deaminase zinc-binding region
BnaAnng24200D	3.15644	1.09241e-05	0.000149208	3.49329	0.00126505	0.014762	3.45221	6.8974e-05	0.00107956	PF02362:B3 DNA binding domain
BnaAnng25330D	1.06352	9.57381e-05	0.00109053	1.68265	0.00109767	0.0130236	1.45185	0.000389335	0.00508228	Q9LT67.1 RecName: Full=Transcription factor bHLH113; AltName: Full=Basic helix-loop-helix protein 113; Short=AtbHLH113; Short=bHLH 113; AltName: Full=Transcription factor EN 61; AltName: Full=bHLH transcription factor bHLH113 && -
BnaAnng29420D	-1.30611	0.00384326	0.029228	-1.39825	0.00146819	0.0167787	-1.64102	0.000556973	0.0069812	PF00005:ABC transporter
BnaAnng30420D	-5.03726	3.60964e-05	0.000445487	-5.71059	0.000926753	0.0112366	-5.03193	0.000240437	0.00330508	Q9LMP6.2 RecName: Full=Probable disease resistance protein At1g15890 && PF00931:NB-ARC domain
BnaAnng33520D	-1.21588	3.90882e-05	0.000479318	-1.40845	0.00232023	0.0250201	-1.67316	1.7786e-06	3.87315e-05	PF13646:HEAT repeats
BnaAnng34970D	-2.25166	0.000197923	0.00210197	-2.57294	0.00434036	0.0428454	-3.71491	0.000261903	0.0035715	O82533.2 RecName: Full=Cell division protein FtsZ homolog 2-1, chloroplastic; Short=AtFtsZ2-1; AltName: Full=Plastid division protein FTSZ2-1; Flags: Precursor && PF12327:FtsZ family, C-terminal domain|PF00091:Tubulin/FtsZ family, GTPase domain
BnaAnng36290D	-9.19847	1.11375e-24	1.57782e-22	-8.29292	9.43533e-13	5.91332e-11	-9.10671	3.56488e-17	4.34649e-15	PF00847:AP2 domain
BnaC01g01920D	-6.47593	3.10941e-06	4.67989e-05	-6.30462	9.30456e-06	0.000178611	-5.53914	0.000635299	0.00783018	Q00624.1 RecName: Full=L-ascorbate oxidase homolog; Flags: Precursor && PF00394:Multicopper oxidase|PF07731:Multicopper oxidase|PF07732:Multicopper oxidase
BnaC01g01980D	-6.64427	1.10848e-06	1.8039e-05	-5.57684	0.0022714	0.0245675	-5.31872	0.00197653	0.0213357	PF04535:Domain of unknown function (DUF588)
BnaC01g02190D	-3.93071	1.19297e-08	2.66591e-07	-2.66599	5.13679e-05	0.000845569	-4.01023	8.47285e-06	0.00016249	PF00004:ATPase family associated with various cellular activities (AAA)|PF12037:Domain of unknown function (DUF3523)
BnaC01g02580D	-1.64085	0.00452132	0.0336648	-1.23115	0.00498741	0.0482813	-1.7061	0.000558755	0.0069948	PF02259:FAT domain
BnaC01g03340D	3.48129	0.000722525	0.00671288	2.63552	0.00486655	0.0472713	2.84451	0.00110279	0.0128034	Q1GTB8.1 RecName: Full=Kynurenine formamidase; Short=KFA; Short=KFase; AltName: Full=Arylformamidase; AltName: Full=N-formylkynurenine formamidase; Short=FKF && PF04199:Putative cyclase
BnaC01g07500D	-1.37149	3.03814e-08	6.38018e-07	-1.34174	3.67773e-08	1.09401e-06	-1.3711	0.000159653	0.00228264	PF00883:Cytosol aminopeptidase family, catalytic domain|PF02789:Cytosol aminopeptidase family, N-terminal domain
BnaC01g09100D	-1.66987	0.000734575	0.00681393	-2.00985	0.00261228	0.0277701	-2.66877	1.37175e-05	0.0002499	P49689.3 RecName: Full=40S ribosomal protein S30 && PF04758:Ribosomal protein S30
BnaC01g16440D	2.13412	6.65062e-10	1.80299e-08	2.4442	9.79754e-07	2.24271e-05	2.2291	4.86298e-07	1.18543e-05	F4JQZ3.2 RecName: Full=Rho GTPase-activating protein REN1; AltName: Full=Protein ROP1 ENHANCER 1; AltName: Full=Rho-type GTPase-activating protein REN1 && PF14389:Leucine-zipper of ternary complex factor MIP1|PF00620:RhoGAP domain|PF00169:PH domain
BnaC01g20390D	4.52169	0.000294292	0.00300412	2.78382	0.000210747	0.00299621	2.05337	0.00380091	0.0372293	PF03226:Yippee zinc-binding/DNA-binding /Mis18, centromere assembly
BnaC01g29860D	3.00111	1.95879e-09	4.95204e-08	1.90561	0.000243001	0.0033936	2.26529	1.26266e-05	0.000232391	PF01925:Sulfite exporter TauE/SafE
BnaC01g30550D	1.19775	0.00583799	0.0419449	1.52141	0.000172842	0.00251782	1.77055	0.0049417	0.0464966	PF01738:Dienelactone hydrolase family
BnaC01g35600D	2.62987	0.00010888	0.00122719	1.7714	0.00229668	0.024809	1.98398	0.000796541	0.00959195	PF00808:Histone-like transcription factor (CBF/NF-Y) and archaeal histone
BnaC01g35650D	2.55066	0.000143768	0.00157752	3.53481	0.0030018	0.0313215	3.19371	3.94387e-05	0.000652318	Q9LSC2.1 RecName: Full=PTI1-like tyrosine-protein kinase At3g15890 && PF07714:Protein tyrosine kinase
BnaC01g36030D	1.67332	0.001196	0.0105028	1.95658	1.13947e-05	0.000214357	1.76126	0.000313397	0.00420432	PF02309:AUX/IAA family
BnaC01g37200D	-1.65703	5.23689e-09	1.24069e-07	-1.02954	0.00320551	0.0330799	-1.3625	6.25498e-07	1.49568e-05	PF01070:FMN-dependent dehydrogenase
BnaC01g38270D	2.87132	4.03414e-08	8.33264e-07	2.50529	7.4573e-06	0.000145595	2.74396	1.52223e-06	3.35608e-05	PF00162:Phosphoglycerate kinase
BnaC01g40720D	-5.98734	3.71945e-05	0.000458112	-5.72546	0.000148417	0.00219489	-6.31382	0.000231547	0.0031979	PF00320:GATA zinc finger
BnaC02g03720D	1.47227	4.4184e-05	0.000536614	1.223	0.000240608	0.0033643	1.29225	0.00023419	0.00323186	PF00249:Myb-like DNA-binding domain
BnaC02g31870D	1.6773	0.00286476	0.0225875	2.73452	0.00268786	0.0284374	2.59105	3.68837e-05	0.000613817	PF07714:Protein tyrosine kinase|PF08263:Leucine rich repeat N-terminal domain
BnaC02g34860D	1.88851	2.98605e-14	1.44885e-12	2.48134	8.17856e-05	0.0012823	2.66326	5.64416e-08	1.59897e-06	PF03124:EXS family|PF03105:SPX domain
BnaC02g35270D	1.47022	1.28323e-05	0.000172566	1.7579	1.94905e-05	0.000350972	1.59276	3.98358e-07	9.84434e-06	Q9SI54.1 RecName: Full=Sm-like protein LSM7; Short=AtLSM7; AltName: Full=Protein EMBRYO DEFECTIVE 2816; AltName: Full=U6 snRNA-associated Sm-like protein LSM7 && PF01423:LSM domain
BnaC02g43440D	-4.85303	0.000815561	0.00748054	-5.29298	0.00130296	0.0151349	-6.0143	6.949e-05	0.00108667	PF00153:Mitochondrial carrier protein
BnaC02g47820D	-2.62857	5.8927e-06	8.49299e-05	-2.33337	6.66754e-05	0.00106535	-1.93398	5.43552e-05	0.000871334	O80327.1 RecName: Full=Thaumatin-like protein 1; Flags: Precursor && PF00314:Thaumatin family
BnaC02g48250D	1.62146	0.00012138	0.0013571	1.87951	0.00128516	0.0149661	1.72605	0.000346926	0.00460051	PF04535:Domain of unknown function (DUF588)
BnaC03g00020D	5.12841	0.000500369	0.00483244	6.066	6.15018e-05	0.000992387	5.09749	0.00100351	0.0117793	PF00428:60s Acidic ribosomal protein
BnaC03g02740D	1.63549	4.19499e-05	0.00051162	1.69708	0.0035882	0.0364482	1.34541	0.00527392	0.0491223	PF00168:C2 domain|PF08372:Plant phosphoribosyltransferase C-terminal
BnaC03g03670D	1.03822	2.5112e-05	0.00032001	1.20036	0.00285183	0.0299205	1.44979	4.41137e-08	1.27808e-06	PF00400:WD domain, G-beta repeat
BnaC03g05810D	-2.90773	4.4529e-05	0.000540145	-4.73487	3.95629e-05	0.000667251	-4.38146	3.71831e-06	7.61321e-05	PF03321:GH3 auxin-responsive promoter
BnaC03g07730D	1.61092	0.000188632	0.00201023	1.29432	1.24368e-05	0.000232304	1.18657	0.00111374	0.0129177	PF13193:AMP-binding enzyme C-terminal domain|PF00501:AMP-binding enzyme
BnaC03g08390D	2.1403	4.89207e-21	4.90614e-19	2.40067	1.07023e-07	2.94136e-06	2.53855	1.01131e-08	3.27145e-07	PF14009:Domain of unknown function (DUF4228)
BnaC03g08470D	1.38247	3.32383e-05	0.000413624	1.39759	0.00109701	0.0130181	1.76554	0.000319149	0.00427658	Q9Y383.2 RecName: Full=Putative RNA-binding protein Luc7-like 2 && PF03194:LUC7 N_terminus
BnaC03g09270D	-3.70546	6.77393e-05	0.000794719	-3.68409	0.000394019	0.00524335	-3.278	0.00132594	0.0150961	PF11926:Domain of unknown function (DUF3444)
BnaC03g14390D	-2.39424	0.000306754	0.00311346	-2.71126	0.000494014	0.00641359	-2.28936	0.00459755	0.0437331	PF13890:Rab3 GTPase-activating protein catalytic subunit
BnaC03g18830D	-2.96935	0.00279048	0.0220592	-2.24552	0.00252346	0.0269365	-3.2223	0.00069301	0.00845689	Q84VG7.2 RecName: Full=Protein FRIGIDA-ESSENTIAL 1; AltName: Full=Zinc finger CCCH domain-containing protein 27; Short=AtC3H27 && -
BnaC03g29930D	-1.89006	1.21776e-05	0.000164747	-2.20128	0.00166159	0.0187293	-2.43077	7.30384e-05	0.00113615	PF00069:Protein kinase domain|PF01657:Salt stress response/antifungal
BnaC03g33820D	1.23291	0.00199387	0.0164465	1.41591	0.0037251	0.0376437	1.4458	0.00333409	0.0332411	PF13450:NAD(P)-binding Rossmann-like domain
BnaC03g35240D	1.67214	0.000483633	0.00468249	1.46261	0.000514123	0.00664073	1.93433	3.49014e-06	7.18795e-05	Q94BT2.3 RecName: Full=Auxin-induced in root cultures protein 12; Flags: Precursor && PF04526:Protein of unknown function (DUF568)
BnaC03g37430D	-5.33887	0.00269848	0.0214366	-5.53776	0.000865451	0.0105926	-5.26416	0.00167254	0.0184861	PF00450:Serine carboxypeptidase
BnaC03g39830D	1.72613	6.66129e-06	9.50639e-05	2.09196	0.00101232	0.0121537	1.42301	0.00496135	0.0466565	PF00512:His Kinase A (phospho-acceptor) domain|PF00360:Phytochrome region|PF00989:PAS fold|PF02518:Histidine kinase-, DNA gyrase B-, and HSP90-like ATPase|PF01590:GAF domain|PF08446:PAS fold
BnaC03g41310D	1.59046	1.49019e-06	2.37898e-05	1.76168	3.1029e-07	7.79142e-06	1.81131	1.88077e-06	4.08171e-05	Q9LHE7.1 RecName: Full=Phytochrome-associated serine/threonine-protein phosphatase 3; Short=AtFyPP3; AltName: Full=Protein EMBRYO DEFECTIVE 2736 && PF05705:Eukaryotic protein of unknown function (DUF829)|PF00149:Calcineurin-like phosphoesterase
BnaC03g44080D	-4.72153	0.00260906	0.0208402	-4.73849	0.00453394	0.0444718	-6.07683	0.000657822	0.0080752	PF00646:F-box domain|PF07734:F-box associated
BnaC03g57190D	1.89703	0.0012554	0.0109514	3.15548	0.00170063	0.0191167	2.25553	5.33786e-05	0.000857635	Q9STT8.2 RecName: Full=ABC transporter A family member 4; Short=ABC transporter ABCA.4; Short=AtABCA4; AltName: Full=Putative ABC2 homolog 3 && PF00005:ABC transporter|PF12698:ABC-2 family transporter protein
BnaC03g62970D	-6.49456	5.98013e-06	8.60299e-05	-5.6089	0.000356284	0.00479325	-5.17148	0.00254405	0.0264143	PF00319:SRF-type transcription factor (DNA-binding and dimerisation domain)|PF01486:K-box region
BnaC03g63030D	-1.60462	0.00179411	0.0150137	-2.78822	0.000713493	0.00890582	-2.61447	0.00146411	0.0164517	PF02221:ML domain
BnaC03g63240D	-1.14689	1.00374e-05	0.000138125	-1.19127	0.00125884	0.014702	-1.16892	0.000262436	0.00357807	Q9SZ67.1 RecName: Full=Probable WRKY transcription factor 19; AltName: Full=WRKY DNA-binding protein 19 && PF07725:Leucine Rich Repeat|PF00931:NB-ARC domain|PF01582:TIR domain|PF02362:B3 DNA binding domain
BnaC03g64350D	-1.33038	0.00551254	0.0399526	-2.36309	3.39326e-05	0.000581873	-2.47725	0.000164524	0.00234463	PF08583:Cytochrome c oxidase biogenesis protein Cmc1 like
BnaC03g66870D	-3.09445	2.96196e-05	0.000372046	-1.64788	0.0047044	0.0458716	-2.14315	4.1927e-05	0.000690223	P59082.1 RecName: Full=Lachrymatory-factor synthase; Flags: Precursor && PF10604:Polyketide cyclase / dehydrase and lipid transport
BnaC03g71230D	1.49353	0.000921377	0.00833701	2.12962	1.25157e-05	0.000233524	2.35639	5.54369e-05	0.000887256	Q9MA55.1 RecName: Full=Acyl-CoA-binding domain-containing protein 4; Short=Acyl-CoA binding protein 4 && PF13415:Galactose oxidase, central domain|PF01344:Kelch motif|PF13418:Galactose oxidase, central domain
BnaC03g71390D	1.13338	0.00163111	0.0138055	1.1165	0.00135502	0.0156601	1.11903	0.00372349	0.036614	PF00069:Protein kinase domain
BnaC03g72620D	-2.24348	0.000182385	0.00195152	-1.43325	0.00305617	0.031797	-2.10722	0.000239845	0.00329759	Q84JU6.1 RecName: Full=E3 ubiquitin-protein ligase HOS1; AltName: Full=Protein HIGH EXPRESSION OF OSMOTICALLY RESPONSIVE GENE 1; AltName: Full=RING finger protein HOS1 && PF13934:Nuclear pore complex assembly
BnaC04g00570D	1.81185	2.61969e-12	9.88055e-11	1.77171	0.00261247	0.0277701	1.46608	6.8253e-08	1.90136e-06	Q84LR6.1 RecName: Full=Probable inactive purple acid phosphatase 14; Flags: Precursor && PF06966:Protein of unknown function (DUF1295)|PF00149:Calcineurin-like phosphoesterase
BnaC04g06800D	1.98043	7.5154e-06	0.000105954	1.99589	5.25264e-08	1.52418e-06	2.98173	3.32063e-11	1.62173e-09	PF03106:WRKY DNA -binding domain
BnaC04g08400D	-1.57301	0.00332364	0.0257541	-2.21686	0.00024606	0.00343353	-2.641	1.12432e-07	3.02644e-06	PF00722:Glycosyl hydrolases family 16|PF06955:Xyloglucan endo-transglycosylase (XET) C-terminus
BnaC04g13150D	-4.29671	0.00612235	0.0437131	-5.67651	0.00351582	0.0357978	-4.56096	0.000361133	0.0047646	PF00646:F-box domain|PF08268:F-box associated domain
BnaC04g17560D	-4.26277	0.00108271	0.00962438	-4.41789	0.00335737	0.0343988	-6.31574	3.026e-05	0.000512697	PF00069:Protein kinase domain
BnaC04g19550D	2.94602	0.00146391	0.0125581	4.81282	0.00012959	0.00193879	3.58631	0.00377993	0.037042	F4HYR6.1 RecName: Full=Subtilisin-like protease SBT2.4; AltName: Full=Protein ABNORMAL LEAF SHAPE 1; AltName: Full=Subtilase subfamily 2 member 4; Short=AtSBT2.4; Flags: Precursor && PF05922:Peptidase inhibitor I9|PF00082:Subtilase family
BnaC04g19970D	5.70687	0.000146225	0.00160197	5.96018	3.90978e-05	0.000660218	5.13756	0.00324038	0.0324495	Q8LPN7.1 RecName: Full=E3 ubiquitin-protein ligase RING1-like; AltName: Full=RING finger protein 1 && -
BnaC04g20110D	-5.77668	0.000163386	0.00177163	-5.22136	0.00172173	0.0193317	-4.23023	0.00327327	0.0327443	P46606.1 RecName: Full=Homeobox protein HD1 && PF03791:KNOX2 domain|PF05920:Homeobox KN domain
BnaC04g21190D	1.2297	1.9505e-05	0.000253401	1.36391	2.32102e-06	4.98537e-05	1.44076	0.000592235	0.00736795	PF05347:Complex 1 protein (LYR family)
BnaC04g21680D	1.69921	2.69612e-15	1.51426e-13	1.16322	0.00318889	0.032946	2.02995	6.61594e-07	1.57235e-05	PF06376:Protein of unknown function (DUF1070)
BnaC04g27380D	6.57731	2.35923e-06	3.62999e-05	7.90593	4.91162e-07	1.1856e-05	7.64675	3.78226e-08	1.1114e-06	PF00249:Myb-like DNA-binding domain
BnaC04g29140D	5.78976	0.000367562	0.00366039	5.92828	0.00146806	0.0167787	5.64477	0.00113057	0.0130913	Q84JM4.1 RecName: Full=Topless-related protein 3 && -
BnaC04g29840D	1.63789	1.54349e-09	3.97272e-08	1.4749	5.64397e-07	1.34674e-05	1.37935	1.82236e-05	0.000324664	PF13087:AAA domain|PF13086:AAA domain
BnaC04g29910D	1.12159	0.000243219	0.00252907	1.58516	0.000137841	0.00205328	1.41589	0.00092681	0.0109855	Q9FG61.1 RecName: Full=Probable protein phosphatase 2C 74; Short=AtPP2C74 && PF00481:Protein phosphatase 2C
BnaC04g35300D	2.16474	7.73623e-06	0.000108822	2.26621	0.00201292	0.0221211	2.46015	0.00102418	0.0119818	Q1PF17.1 RecName: Full=Transcription factor bHLH18; AltName: Full=Basic helix-loop-helix protein 18; Short=AtbHLH18; Short=bHLH 18; AltName: Full=Transcription factor EN 28; AltName: Full=bHLH transcription factor bHLH018 && PF00010:Helix-loop-helix DNA-binding domain
BnaC04g37140D	2.27704	2.02319e-12	7.81254e-11	1.75204	0.00371216	0.0375407	1.76878	0.000843449	0.0100913	PF00318:Ribosomal protein S2
BnaC04g37520D	4.89583	2.49348e-13	1.07747e-11	5.05176	6.34405e-11	3.02759e-09	6.37313	5.33111e-13	3.32799e-11	PF00481:Protein phosphatase 2C
BnaC04g40090D	1.06259	0.000221458	0.00232429	1.35145	0.00299348	0.0312442	1.0995	0.00242701	0.0254057	PF13857:Ankyrin repeats (many copies)|PF12796:Ankyrin repeats (3 copies)
BnaC04g44020D	1.24148	2.04974e-06	3.19399e-05	1.50944	0.000194133	0.0027889	1.31448	6.02785e-05	0.000955381	PF03479:Domain of unknown function (DUF296)
BnaC04g46110D	1.35907	0.00378579	0.0288571	2.71477	9.30749e-06	0.000178617	1.63042	0.00353287	0.03495	PF11955:Plant organelle RNA recognition domain
BnaC04g49870D	-9.74514	6.61157e-42	2.75944e-39	-9.89348	6.60855e-19	9.48783e-17	-9.28566	1.29414e-24	3.93448e-22	PF00847:AP2 domain
BnaC04g54890D	-1.7474	0.000470018	0.00456271	-2.2513	0.00338154	0.0346205	-2.15332	0.00292843	0.0298319	PF00685:Sulfotransferase domain
BnaC04g56220D	1.18526	0.000241024	0.00250962	1.10757	8.13699e-05	0.00127636	1.21494	0.000224038	0.00310396	PF01423:LSM domain
BnaC05g05020D	1.10336	7.80075e-06	0.000109642	1.10423	0.000214319	0.00304069	1.08489	0.0001153	0.00171157	PF05686:Glycosyl transferase family 90
BnaC05g08790D	1.07572	9.51553e-07	1.57351e-05	1.1516	0.000177033	0.00257122	1.0884	0.00126212	0.0144454	PF06749:Protein of unknown function (DUF1218)
BnaC05g10770D	-9.30458	1.7771e-22	2.08877e-20	-9.99699	4.64896e-19	6.86107e-17	-11.2984	1.96054e-27	7.8678e-25	PF12796:Ankyrin repeats (3 copies)|PF13962:Domain of unknown function
BnaC05g11070D	5.72921	0.000206679	0.00218431	5.25184	0.000956957	0.0115579	4.62713	0.00250423	0.0260934	Q9LHQ7.1 RecName: Full=mRNA cap guanine-N7 methyltransferase 1; AltName: Full=mRNA (guanine-N(7)-)-methyltransferase 1; AltName: Full=mRNA cap methyltransferase 1 && PF03291:mRNA capping enzyme
BnaC05g18520D	-1.49557	0.000174267	0.00187475	-1.60642	0.00317029	0.0327854	-1.77391	4.27412e-05	0.000701981	O49296.1 RecName: Full=Endoglucanase 4; AltName: Full=Endo-1,4-beta glucanase 4; Flags: Precursor && PF00759:Glycosyl hydrolase family 9
BnaC05g20690D	1.79347	8.35871e-16	5.03111e-14	1.38601	8.30233e-06	0.000160404	1.62811	0.000270763	0.00368088	PF00069:Protein kinase domain
BnaC05g22880D	-4.45611	1.3662e-05	0.000182947	-5.56548	6.85111e-05	0.00109112	-2.96946	0.00193061	0.0209216	PF00504:Chlorophyll A-B binding protein
BnaC05g43150D	-5.02393	0.00312193	0.0243781	-3.6183	0.00129149	0.0150245	-5.67525	0.000381028	0.00499053	PF02519:Auxin responsive protein
BnaC05g44880D	-1.73823	1.7552e-08	3.81351e-07	-2.14503	1.7342e-08	5.4844e-07	-2.05392	3.32604e-07	8.32742e-06	Q6ICB0.1 RecName: Full=Desumoylating isopeptidase 1; Short=DeSI-1; AltName: Full=PPPDE peptidase domain-containing protein 2; AltName: Full=Protein FAM152B && PF05903:PPPDE putative peptidase domain
BnaC05g46530D	-5.77999	0.000219411	0.00230569	-5.92386	5.57583e-05	0.000909764	-5.07576	0.00266357	0.0274805	PF01535:PPR repeat|PF13041:PPR repeat family
BnaC05g46600D	-4.85684	0.00479928	0.0354316	-5.84812	0.000370877	0.00497106	-6.10619	0.000191339	0.00268269	PF00657:GDSL-like Lipase/Acylhydrolase
BnaC05g47140D	-1.67638	0.00141465	0.0121911	-2.63911	2.12816e-06	4.59693e-05	-2.59549	4.08293e-06	8.29447e-05	PF10533:Plant zinc cluster domain|PF03106:WRKY DNA -binding domain
BnaC05g48100D	-5.56252	0.000479176	0.0046445	-4.22282	0.00276554	0.0291488	-3.60997	0.00166314	0.0183938	PF00046:Homeobox domain
BnaC05g49970D	-2.04917	9.32593e-09	2.12077e-07	-2.25243	0.000883019	0.0107672	-1.45519	0.000805229	0.00968495	PF13855:Leucine rich repeat|PF00069:Protein kinase domain|PF08263:Leucine rich repeat N-terminal domain
BnaC06g04020D	5.60298	0.000237559	0.00247576	5.35838	0.00174352	0.019554	5.79607	0.000335073	0.00446471	PF08268:F-box associated domain
BnaC06g04760D	2.4666	0.00369353	0.0282621	2.11127	0.00215573	0.0234824	2.63549	0.000449012	0.00575957	F4HQ20.1 RecName: Full=LEAF RUST 10 DISEASE-RESISTANCE LOCUS RECEPTOR-LIKE PROTEIN KINASE-like 2.5; AltName: Full=Probable receptor-like serine/threonine-protein kinase LRK10L-2.5; Flags: Precursor && PF00069:Protein kinase domain
BnaC06g11060D	2.39534	1.76819e-05	0.000231747	2.82094	8.28373e-05	0.00129583	2.50771	0.000369177	0.00485523	PF01699:Sodium/calcium exchanger protein
BnaC06g12300D	2.88441	0.000125699	0.00139843	4.56845	0.000604596	0.0076878	3.53391	0.00334621	0.0333202	Q9SE43.2 RecName: Full=Homeobox-leucine zipper protein REVOLUTA; AltName: Full=HD-ZIP protein REV; AltName: Full=Homeodomain transcription factor REV; AltName: Full=Protein AMPHIVASAL VASCULAR BUNDLE 1; AltName: Full=Protein INTERFASCICULAR FIBERLESS 1 && PF08670:MEKHLA domain
BnaC06g29160D	-5.50007	0.00015457	0.00168337	-4.14991	0.00327442	0.0336947	-5.62163	0.000132677	0.00193764	PF00389:D-isomer specific 2-hydroxyacid dehydrogenase, catalytic domain|PF02826:D-isomer specific 2-hydroxyacid dehydrogenase, NAD binding domain|PF01066:CDP-alcohol phosphatidyltransferase
BnaC06g34080D	6.13702	2.03213e-05	0.000263173	6.77416	5.87047e-06	0.000116841	7.47361	7.63508e-07	1.79033e-05	O82500.1 RecName: Full=Putative disease resistance protein At4g11170 && PF00931:NB-ARC domain|PF01582:TIR domain
BnaC06g34670D	3.81478	1.40886e-26	2.26261e-24	3.59386	2.00631e-13	1.40638e-11	4.12403	8.25985e-14	5.80662e-12	PF07714:Protein tyrosine kinase
BnaC06g35100D	5.7095	0.000140881	0.00154978	5.82337	9.0452e-05	0.00140343	5.88139	1.86114e-05	0.000330733	PF13855:Leucine rich repeat
BnaC06g39790D	-5.38421	0.000595051	0.00565132	-5.46548	0.000858399	0.0105156	-5.336	0.00139464	0.0157518	PF14374:60S ribosomal protein L4 C-terminal domain|PF00573:Ribosomal protein L4/L1 family|PF00999:Sodium/hydrogen exchanger family
BnaC06g39940D	-2.24895	5.11735e-05	0.000614231	-2.73715	0.000291376	0.00399839	-1.72461	0.00127217	0.014551	PF02365:No apical meristem (NAM) protein
BnaC06g41950D	1.139	8.89304e-05	0.00101881	1.50765	3.68238e-05	0.000626719	1.48635	2.40983e-06	5.11762e-05	PF04043:Plant invertase/pectin methylesterase inhibitor|PF01095:Pectinesterase
BnaC07g03700D	-3.37428	0.00193091	0.0160048	-2.71658	0.000403376	0.00535437	-3.08805	0.000362305	0.00477827	PF02213:GYF domain
BnaC07g07200D	-5.31755	0.00161537	0.0136955	-5.46541	0.00341565	0.0349437	-6.15452	6.08384e-05	0.000962512	PF02136:Nuclear transport factor 2 (NTF2) domain
BnaC07g08850D	2.25087	1.41955e-12	5.58683e-11	2.10071	9.12752e-06	0.00017536	1.91175	7.77639e-07	1.82103e-05	PF04570:zinc-finger of the FCS-type, C2-C2
BnaC07g21680D	-1.43016	0.00091528	0.00828937	-1.75127	0.000188357	0.00271501	-1.61053	0.000353204	0.00467228	PF14299:Phloem protein 2
BnaC07g25140D	2.59874	6.22433e-10	1.69401e-08	1.83555	1.77623e-06	3.9044e-05	1.85462	4.70595e-05	0.000765034	PF00004:ATPase family associated with various cellular activities (AAA)|PF14363:Domain associated at C-terminal with AAA
BnaC07g36130D	-3.43379	1.97401e-21	2.07212e-19	-2.35089	0.00365804	0.0370752	-3.32338	7.12455e-07	1.68355e-05	PF02705:K+ potassium transporter
BnaC07g37040D	7.11554	6.65144e-08	1.32648e-06	6.26743	1.13189e-05	0.000213261	6.3156	2.02914e-05	0.000358355	PF09767:Predicted membrane protein (DUF2053)
BnaC07g37530D	1.87925	4.52e-05	0.000547712	2.01898	0.00019611	0.00281377	2.85382	3.38459e-08	1.00421e-06	PF07714:Protein tyrosine kinase
BnaC07g40960D	-1.74403	0.000108682	0.00122575	-2.28808	0.000870468	0.0106445	-2.90951	1.75807e-05	0.000314086	Q8TC12.2 RecName: Full=Retinol dehydrogenase 11; AltName: Full=Androgen-regulated short-chain dehydrogenase/reductase 1; AltName: Full=HCV core-binding protein HCBP12; AltName: Full=Prostate short-chain dehydrogenase/reductase 1; AltName: Full=Retinal reductase 1; Short=RalR1; AltName: Full=Short chain dehydrogenase/reductase family 7C member 1 && PF00106:short chain dehydrogenase
BnaC07g42580D	-2.70553	4.44199e-05	0.000539385	-1.7561	0.000664715	0.00837312	-2.14697	0.000136195	0.00198276	PF13639:Ring finger domain
BnaC07g43510D	1.18627	6.28127e-07	1.0738e-05	1.15891	5.96699e-05	0.000966692	1.06279	0.00467114	0.044307	Q9SK27.2 RecName: Full=Early nodulin-like protein 1; AltName: Full=Phytocyanin-like protein; Flags: Precursor && PF02298:Plastocyanin-like domain
BnaC07g51320D	1.35934	0.000291533	0.0029777	1.27911	0.00113942	0.0134701	1.46589	8.79123e-06	0.000167954	PF00071:Ras family
BnaC08g24860D	-1.80634	1.86007e-07	3.47486e-06	-1.65512	1.60388e-05	0.000293593	-1.9241	1.56623e-05	0.000282328	PF00248:Aldo/keto reductase family
BnaC09g06970D	5.2673	0.00158227	0.0134477	5.28995	0.0012476	0.0145807	5.53271	0.000932639	0.0110471	PF00134:Cyclin, N-terminal domain
BnaC09g07400D	5.41927	0.00115608	0.0102024	6.22523	0.000611282	0.00776274	6.5331	5.42064e-05	0.000869355	PF04669:Polysaccharide biosynthesis
BnaC09g08250D	-4.65917	0.00197219	0.016287	-3.86837	0.00278308	0.0293157	-4.2195	0.00113917	0.0131866	Q8RWR2.2 RecName: Full=La-related protein 1B; Short=AtLARP1b && PF05383:La domain
BnaC09g30440D	2.36935	0.00197089	0.0162826	4.44296	0.00443189	0.0436297	3.04015	0.00165881	0.0183575	PF00141:Peroxidase
BnaC09g38440D	1.18815	0.00651294	0.0460211	1.73132	0.00105621	0.0126123	1.77013	0.00309135	0.0312243	PF13839:GDSL/SGNH-like Acyl-Esterase family found in Pmr5 and Cas1p|PF14416:PMR5 N terminal Domain
BnaC09g45590D	5.42255	0.0011946	0.0104919	5.46353	0.00115665	0.0136479	4.35433	0.00120064	0.0138252	PF14698:Argininosuccinate lyase C-terminal|PF00206:Lyase
BnaCnng01170D	1.15175	8.72929e-05	0.00100186	1.4672	9.85699e-06	0.00018832	1.38128	0.000574212	0.0071704	Q9ZSM8.1 RecName: Full=Histone-lysine N-methyltransferase EZA1; AltName: Full=CURLY LEAF-like 1; AltName: Full=Protein SET DOMAIN GROUP 10; AltName: Full=Protein SWINGER && PF00856:SET domain
BnaCnng28160D	6.16035	5.17622e-05	0.000620541	6.93616	5.17289e-06	0.000104043	6.27944	0.000160051	0.00228786	PF00676:Dehydrogenase E1 component
BnaCnng28850D	1.50147	0.000165474	0.00179232	1.26388	0.00469518	0.0458208	1.2411	0.00264024	0.0272718	PF02701:Dof domain, zinc finger
BnaCnng29130D	-1.07576	0.000738012	0.00684399	-1.15186	0.000197021	0.00282506	-1.32445	0.000224905	0.00311474	Q9MAC5.1 RecName: Full=Polypyrimidine tract-binding protein homolog 1 && PF13893:RNA recognition motif. (a.k.a. RRM, RBD, or RNP domain)|PF00076:RNA recognition motif. (a.k.a. RRM, RBD, or RNP domain)
BnaCnng45520D	1.1196	0.00368954	0.0282346	1.99841	7.77428e-05	0.00122732	1.67762	0.00176465	0.0193795	Q9FIU7.2 RecName: Full=Putative beta-glucosidase 41; Short=AtBGLU41; Flags: Precursor && PF00232:Glycosyl hydrolase family 1
BnaCnng46610D	2.2732	0.000173631	0.00186901	2.42104	0.00048298	0.00628341	2.59307	0.00269336	0.0277471	PF00106:short chain dehydrogenase
BnaCnng56700D	1.46105	0.00235619	0.0190873	1.47424	3.05754e-05	0.000528131	2.26084	1.34244e-09	4.99619e-08	Q8L548.1 RecName: Full=Protein tesmin/TSO1-like CXC 3; Short=AtTCX3; AltName: Full=Protein TSO1-like 1; Short=Protein SOL1 && PF03638:Tesmin/TSO1-like CXC domain, cysteine-rich domain
BnaCnng57560D	-7.21734	8.44062e-08	1.65349e-06	-6.66715	0.000283376	0.00389484	-5.88578	0.00020736	0.00288771	PF00010:Helix-loop-helix DNA-binding domain
BnaCnng71820D	1.38858	1.29595e-05	0.000174142	2.08354	7.40832e-08	2.08876e-06	2.09258	4.78802e-08	1.37867e-06	PF00664:ABC transporter transmembrane region|PF00005:ABC transporter
BnaCnng74420D	1.63031	2.79266e-07	5.06896e-06	1.55769	0.00106547	0.0127008	1.14128	0.00146069	0.0164238	PF03478:Protein of unknown function (DUF295)
BnaUnng00010D	-4.22516	2.1997e-09	5.52302e-08	-2.32275	0.00227183	0.0245675	-3.23073	1.11816e-05	0.000208737	P0DH95.1 RecName: Full=Calmodulin-1; Short=CaM-1 >P0DH96.1 RecName: Full=Calmodulin-4; Short=CaM-4 && PF13833:EF-hand domain pair|PF13499:EF-hand domain pair
BnaUnng00150D	-5.43605	0.00195503	0.0161759	-5.3869	0.000655314	0.00826988	-5.23203	0.00170855	0.0188338	PF04061:ORMDL family
BnaUnng00260D	5.38544	0.000633852	0.00598233	6.95872	0.000102324	0.00156743	6.13573	0.000250524	0.00342763	PF03107:C1 domain|PF07649:C1-like domain
BnaUnng00480D	2.25123	1.2604e-10	3.79644e-09	1.93065	0.000138399	0.00205981	2.1273	8.74294e-05	0.00133133	PF00931:NB-ARC domain|PF01582:TIR domain|PF07725:Leucine Rich Repeat
BnaUnng03810D	1.02141	0.000951423	0.00857437	1.22649	1.33575e-06	2.9986e-05	1.34383	1.11041e-06	2.51623e-05	Q8RXA7.1 RecName: Full=DENN domain and WD repeat-containing protein SCD1; AltName: Full=Protein STOMATAL CYTOKINESIS DEFECTIVE 1 && -
BnaUnng04830D	-3.98703	6.696e-07	1.13915e-05	-4.19894	0.000180514	0.00261589	-4.32295	0.00124942	0.0143141	PF14547:Hydrophobic seed protein

## Sheet: (D) Unino. CR vs Unino. CS
Table S2 D. Differentially expressed genes (DEGs) when comparisons were made between uninoculated clubroot resistant (CR) vs uninoculated clubroot susceptible (CS) genotypes. Res1 = Resistant genotype at 1 day post inoculation, Res4 = Resistant genotype at 4 day post inoculation, and Res7 = Resistant genotype at 7 day post inoculation. Sus1 = Susceptible genotype at 1 day post inoculation, Sus4 =…
gene_id	Res7_CvsSus7_C_log2FoldChange	Res7_CvsSus7_C_pvalue	Res7_CvsSus7_C_padj	Res4_CvsSus4_C_log2FoldChange	Res4_CvsSus4_C_pvalue	Res4_CvsSus4_C_padj	Res1_CvsSus1_C_log2FoldChange	Res1_CvsSus1_C_pvalue	Res1_CvsSus1_C_padj	gene_description	tf_family
BnaA03g50350D	-5.5022	0.000661911	0.00818713	-5.01044	0.0101122	0.0986254	-6.68199	5.9458e-06	9.10106e-05	PF00004:ATPase family associated with various cellular activities (AAA)	AAA
BnaC06g10270D	-4.64859	0.0019438	0.0210188	-4.77229	0.00120061	0.016153	-4.96221	0.000524884	0.00503582	PF00004:ATPase family associated with various cellular activities (AAA)	AAA
BnaA05g14180D	-3.91644	8.04372e-18	1.18295e-15	-3.53688	2.35903e-06	6.26552e-05	-3.11964	1.68593e-11	6.84572e-10	PF00004:ATPase family associated with various cellular activities (AAA)	AAA
BnaC05g24010D	-3.24924	0.00341887	0.0341993	-7.05331	7.57742e-06	0.000179967	-3.81521	0.000896342	0.00805125	PF00004:ATPase family associated with various cellular activities (AAA)	AAA
BnaA03g18710D	-3.02752	1.99861e-05	0.000350741	-2.08515	0.0033744	0.0392104	-2.35584	0.00173054	0.0143354	PF00004:ATPase family associated with various cellular activities (AAA)	AAA
BnaA08g02230D	-1.82205	2.1157e-11	1.07028e-09	-1.77863	5.48879e-06	0.000133641	-1.3656	3.00558e-09	8.47781e-08	PF00004:ATPase family associated with various cellular activities (AAA)	AAA
BnaA03g48780D	1.81773	0.00340986	0.0341292	1.43013	0.00791081	0.0807295	1.01216	0.129512	0.431363	PF00004:ATPase family associated with various cellular activities (AAA)	AAA
BnaA10g06830D	1.92974	3.46175e-09	1.18867e-07	1.62669	2.20928e-06	5.92273e-05	1.80385	8.06689e-14	4.57164e-12	PF00004:ATPase family associated with various cellular activities (AAA)	AAA
BnaC08g27560D	2.03158	2.44747e-05	0.000420622	0.897633	0.0870823	0.50442	1.24493	0.000189984	0.00205691	PF00004:ATPase family associated with various cellular activities (AAA)	AAA
BnaA09g11970D	3.13672	0.000355067	0.00471376	2.298	0.0484887	0.336192	2.77676	0.00889643	0.0582605	PF00004:ATPase family associated with various cellular activities (AAA)	AAA
BnaA05g05880D	3.65024	1.02867e-05	0.000190802	1.46556	0.0235249	0.194559	3.9679	1.4092e-06	2.45524e-05	PF00004:ATPase family associated with various cellular activities (AAA)	AAA
BnaC06g28800D	-1.67484	5.12818e-05	0.000827644	-1.47239	9.16272e-06	0.000214212	-1.61779	1.15182e-10	4.09206e-09	PF00004:ATPase family associated with various cellular activities (AAA)|PF01434:Peptidase family M41	AAA
BnaC05g43180D	-9.73149	3.91433e-42	8.59775e-39	-6.29608	7.53979e-12	6.76317e-10	-7.16377	0.00244854	0.0193589	PF00004:ATPase family associated with various cellular activities (AAA)|PF02359:Cell division protein 48 (CDC48), N-terminal domain|PF02933:Cell division protein 48 (CDC48), domain 2	AAA
BnaA01g32030D	-0.845986	0.000103425	0.00155582	-0.8765	0.000455349	0.00695936	-0.907788	1.76625e-07	3.63685e-06	PF00004:ATPase family associated with various cellular activities (AAA)|PF02359:Cell division protein 48 (CDC48), N-terminal domain|PF02933:Cell division protein 48 (CDC48), domain 2	AAA
BnaC01g38940D	5.88195	1.04361e-72	3.55303e-68	5.3186	8.49189e-50	1.94493e-45	5.9383	5.1143e-53	1.06614e-49	PF00004:ATPase family associated with various cellular activities (AAA)|PF02359:Cell division protein 48 (CDC48), N-terminal domain|PF02933:Cell division protein 48 (CDC48), domain 2	AAA
BnaCnng06190D	-6.62661	4.82167e-09	1.61561e-07	-4.91817	1.01598e-08	4.55963e-07	-5.96586	1.34919e-17	1.2248e-15	PF00004:ATPase family associated with various cellular activities (AAA)|PF12037:Domain of unknown function (DUF3523)	AAA
BnaA03g31340D	2.21092	2.50254e-06	5.21421e-05	1.70494	8.79972e-05	0.00162404	1.69682	7.62319e-10	2.37531e-08	PF00005:ABC transporter	ABC_tran
BnaCnng29690D	7.70412	2.62965e-12	1.52908e-10	8.4426	1.95973e-11	1.61068e-09	8.50782	4.21829e-12	1.87842e-10	PF00005:ABC transporter	ABC_tran
BnaC04g25760D	9.79161	7.54391e-15	6.85082e-13	9.88573	1.82628e-14	2.83899e-12	6.05099	0.000215089	0.0022982	PF00005:ABC transporter	ABC_tran
BnaA07g19210D	-0.903459	0.00407029	0.0397918	-0.906391	0.166917	0.747956	-1.20016	7.09948e-05	0.000845883	PF00005:ABC transporter|PF00664:ABC transporter transmembrane region|PF07673:Protein of unknown function (DUF1602)	ABC_membrane
BnaC03g63120D	1.35053	1.45931e-05	0.000262595	1.08232	0.00485613	0.0533949	1.41413	8.33234e-07	1.51767e-05	PF00005:ABC transporter|PF04068:Possible Fer4-like domain in RNase L inhibitor, RLI	ABC_tran
BnaC07g35780D	-0.907788	0.00115527	0.0133827	-0.94456	0.00640357	0.0674933	-0.855769	5.29137e-07	9.98931e-06	PF00005:ABC transporter|PF04068:Possible Fer4-like domain in RNase L inhibitor, RLI|PF00037:4Fe-4S binding domain|PF07673:Protein of unknown function (DUF1602)	ABC_tran
BnaA08g30900D	3.34229	2.59491e-11	1.28222e-09	2.94771	1.03703e-09	5.75563e-08	2.878	8.78674e-13	4.35036e-11	PF00005:ABC transporter|PF07673:Protein of unknown function (DUF1602)	ABC_tran
BnaA06g17150D	1.30843	0.0029315	0.0299263	1.06373	0.112379	0.594333	0.763437	0.00109512	0.00959776	PF00005:ABC transporter|PF12698:ABC-2 family transporter protein	ABC_tran
BnaA04g20940D	-1.84117	3.38826e-11	1.62701e-09	-1.86701	4.38808e-09	2.13985e-07	-1.8405	2.05487e-33	7.37331e-31	PF00009:Elongation factor Tu GTP binding domain|PF03144:Elongation factor Tu domain 2|PF14492:Elongation Factor G, domain II|PF03764:Elongation factor G, domain IV	GTP_EFTU
BnaA08g23240D	-1.31613	0.00128347	0.0146681	-0.990184	0.0411827	0.297942	-1.07748	0.000933814	0.00834387	PF00009:Elongation factor Tu GTP binding domain|PF11987:Translation-initiation factor 2	GTP_EFTU
BnaC01g08450D	-9.36743	5.11314e-26	2.07238e-23	-7.24978	1.08294e-21	6.0495e-19	-5.65089	3.80992e-06	6.08445e-05	PF00010:Helix-loop-helix DNA-binding domain	HLH
BnaC01g03860D	-6.61982	3.55934e-05	0.00059271	-6.77725	0.0831147	0.489694	-6.05202	2.83973e-05	0.000371813	PF00010:Helix-loop-helix DNA-binding domain	HLH
BnaC01g01170D	-6.42541	7.9024e-06	0.0001498	-7.14661	3.88953e-07	1.24534e-05	-7.83214	3.18427e-09	8.93745e-08	PF00010:Helix-loop-helix DNA-binding domain	HLH
BnaA08g24520D	-5.80519	5.64683e-05	0.000902366	-3.20838	0.0079217	0.0808166	-2.93654	0.0251109	0.134737	PF00010:Helix-loop-helix DNA-binding domain	HLH
BnaC04g35310D	-4.65364	2.66859e-05	0.00045552	-4.91452	3.20926e-09	1.6072e-07	-4.38999	1.85562e-12	8.74889e-11	PF00010:Helix-loop-helix DNA-binding domain	HLH
BnaC05g44630D	-3.68827	1.03149e-09	3.8998e-08	-4.32836	7.46689e-21	3.49014e-18	-3.36065	5.47033e-26	1.07477e-23	PF00010:Helix-loop-helix DNA-binding domain	HLH
BnaA05g30270D	1.9313	7.12038e-05	0.00111533	1.54097	0.000246213	0.00402506	2.15763	1.48078e-11	6.06695e-10	PF00010:Helix-loop-helix DNA-binding domain	HLH
BnaC03g61610D	2.28327	1.74818e-06	3.75032e-05	2.89011	0.000108856	0.0019585	2.25907	4.25192e-09	1.16746e-07	PF00010:Helix-loop-helix DNA-binding domain	HLH
BnaC07g42240D	3.15557	1.013e-06	2.28323e-05	2.62739	0.00473378	0.0523512	3.31167	6.66761e-28	1.53054e-25	PF00010:Helix-loop-helix DNA-binding domain	HLH
BnaA07g22200D	6.84248	5.83857e-06	0.000113392	6.50092	6.75528e-06	0.000162122	6.78755	6.80843e-07	1.26099e-05	PF00010:Helix-loop-helix DNA-binding domain	HLH
BnaA10g14590D	5.20699	2.6831e-12	1.55883e-10	5.09069	3.69933e-13	4.35988e-11	3.96015	6.26714e-16	4.70043e-14	PF00011:Hsp20/alpha crystallin family	-
BnaC06g05390D	7.11354	4.35673e-07	1.04492e-05	4.76756	0.0108762	0.10484	3.41189	0.00370205	0.0276654	PF00011:Hsp20/alpha crystallin family	-
BnaC04g18270D	-1.51883	0.00467692	0.0446705	-2.32672	0.00410057	0.0464692	-1.8762	0.000800666	0.00730348	PF00012:Hsp70 protein	HSP70
BnaA03g32320D	-4.42401	1.66106e-16	1.99125e-14	-4.94825	8.08112e-05	0.00150477	-5.4203	3.16465e-08	7.48104e-07	PF00012:Hsp70 protein|PF10712:NAD-specific glutamate dehydrogenase	HSP70
BnaC01g38510D	5.67426	5.76148e-29	3.16375e-26	2.84855	0.000171551	0.00291837	3.53719	0.00118273	0.0102757	PF00012:Hsp70 protein|PF10712:NAD-specific glutamate dehydrogenase	HSP70
BnaC05g42530D	-7.11734	1.18007e-07	3.14735e-06	-7.65141	7.70989e-09	3.54109e-07	-5.35745	3.74628e-06	5.99404e-05	PF00013:KH domain	KH_1
BnaA04g15300D	-1.10943	1.18946e-05	0.000217427	-0.931249	0.000914355	0.0127461	-0.629573	0.0200999	0.112935	PF00013:KH domain	KH_1
BnaC01g10810D	3.31691	0.00131782	0.0149828	2.10821	0.0399885	0.291048	1.93649	0.014319	0.086268	PF00013:KH domain	KH_1
BnaA10g18850D	4.25968	1.31098e-07	3.46127e-06	4.90501	1.20005e-07	4.31931e-06	4.32208	7.28214e-10	2.27842e-08	PF00013:KH domain	KH_1
BnaA08g00100D	-2.28126	6.68832e-11	3.04829e-09	-2.02532	2.16696e-09	1.11865e-07	-1.78561	2.49747e-11	9.80805e-10	PF00022:Actin	Actin
BnaA08g22640D	-2.15626	0.00250374	0.0260676	-1.26058	0.00305335	0.036035	-1.18234	0.000472897	0.00459459	PF00022:Actin	Actin
BnaA06g12580D	-1.54716	6.94161e-08	1.92923e-06	-1.08357	0.00287717	0.0342617	-0.969779	7.12986e-05	0.000848909	PF00022:Actin	Actin
BnaA02g00190D	0.786494	0.00394366	0.0387095	0.646842	0.0350502	0.26375	0.673036	0.00217478	0.017503	PF00022:Actin	Actin
BnaC04g55390D	5.83905	4.70659e-07	1.12251e-05	5.92835	5.79329e-07	1.78341e-05	5.58001	1.04428e-08	2.69576e-07	PF00022:Actin	Actin
BnaA09g00560D	-9.6888	1.19691e-19	2.24514e-17	-6.59422	4.77301e-11	3.58811e-09	-7.29106	4.79014e-05	0.000593768	PF00025:ADP-ribosylation factor family	Arf
BnaC01g06720D	-6.91346	7.39249e-07	1.70747e-05	-3.57373	0.00930325	0.0920545	-3.96433	7.98674e-05	0.000941397	PF00025:ADP-ribosylation factor family	Arf
BnaCnng06250D	-6.36392	8.38891e-25	3.08762e-22	-4.48545	8.21391e-15	1.35995e-12	-6.1893	3.31691e-44	2.82667e-41	PF00025:ADP-ribosylation factor family	Arf
BnaC07g31870D	-5.06823	0.00298034	0.0303658	-6.19146	6.28793e-05	0.00120413	-1.50639	0.312188	0.694218	PF00025:ADP-ribosylation factor family	Arf
BnaA04g08200D	-1.37548	0.000474332	0.00610382	-1.11912	0.0526117	0.356293	-1.26092	0.000395431	0.00391788	PF00025:ADP-ribosylation factor family	Arf
BnaC09g40900D	-1.1254	0.00362878	0.0360764	-1.12792	0.0172209	0.15133	-0.848907	0.00193022	0.0157768	PF00025:ADP-ribosylation factor family	Arf
BnaA05g32370D	0.956731	0.000156615	0.00225361	1.13545	0.000282569	0.00456294	0.998711	3.74199e-05	0.000475692	PF00025:ADP-ribosylation factor family	Arf
BnaA01g05100D	0.971638	0.00315142	0.0318373	0.730552	0.0193704	0.166243	0.931647	0.000139024	0.00155736	PF00025:ADP-ribosylation factor family	Arf
BnaA04g00470D	1.16899	0.00334883	0.0336023	1.34944	7.5684e-05	0.001422	0.792017	0.000251571	0.00263094	PF00025:ADP-ribosylation factor family	Arf
BnaC03g15590D	2.35681	2.9722e-10	1.22654e-08	1.49328	7.15958e-05	0.00135669	2.13715	1.57048e-10	5.46549e-09	PF00025:ADP-ribosylation factor family	Arf
BnaC04g37220D	3.20118	9.1186e-10	3.47062e-08	3.31778	2.93813e-11	2.31337e-09	2.63994	4.5508e-20	5.29446e-18	PF00025:ADP-ribosylation factor family	Arf
BnaC09g07180D	8.02691	7.62894e-10	2.93647e-08	5.74276	4.29282e-09	2.10235e-07	8.50244	8.20965e-12	3.49595e-10	PF00025:ADP-ribosylation factor family	Arf
BnaCnng01100D	3.88115	7.72549e-58	5.84485e-54	3.61713	4.5722e-38	2.24397e-34	3.65485	5.79185e-84	1.97432e-79	PF00025:ADP-ribosylation factor family|PF14009:Domain of unknown function (DUF4228)	Arf
BnaCnng05910D	-5.36619	1.38557e-38	1.8869e-35	-4.6138	1.88579e-06	5.14585e-05	-5.39648	5.17916e-50	8.40701e-47	PF00026:Eukaryotic aspartyl protease	Asp
BnaC01g08020D	-3.54621	8.70984e-12	4.66978e-10	-3.0707	9.55123e-10	5.36271e-08	-2.35799	7.69846e-12	3.2906e-10	PF00027:Cyclic nucleotide-binding domain|PF00520:Ion transport protein	Ion_trans
BnaA04g14740D	-1.11827	0.00199986	0.0215429	-1.05667	0.00504699	0.0551405	-1.13524	6.26664e-05	0.000756167	PF00027:Cyclic nucleotide-binding domain|PF13857:Ankyrin repeats (many copies)|PF12796:Ankyrin repeats (3 copies)|PF00520:Ion transport protein|PF11834:KHA, dimerisation domain of potassium ion channel	Ion_trans
BnaC04g53510D	-7.43336	4.71917e-08	1.34731e-06	-6.5179	7.19356e-07	2.17261e-05	-6.81183	7.54511e-08	1.66903e-06	PF00036:EF hand	efhand
BnaC01g08200D	-6.37118	1.12226e-15	1.17926e-13	-5.59554	3.65954e-13	4.32783e-11	-6.16913	1.90244e-20	2.29966e-18	PF00041:Fibronectin type III domain|PF07227:PHD - plant homeodomain finger protein	fn3
BnaC01g03050D	-8.84556	6.11526e-13	3.99611e-11	-6.44809	3.17596e-13	3.82173e-11	-6.5718	2.33607e-16	1.83062e-14	PF00046:Homeobox domain	Homeobox
BnaC03g61830D	-3.30449	0.000863755	0.0103773	-5.11663	0.000160879	0.00276488	-3.46078	0.000950202	0.0084701	PF00046:Homeobox domain	Homeobox
BnaA09g52670D	-2.04097	0.000904877	0.0108076	-1.36086	0.0989846	0.547031	-1.30375	0.00413975	0.030449	PF00046:Homeobox domain	Homeobox
BnaA10g21190D	-1.67877	0.000558082	0.00704363	-1.57046	0.000813374	0.0115183	-1.66731	1.67441e-05	0.000230476	PF00046:Homeobox domain	Homeobox
BnaC09g07850D	7.22345	1.1305e-07	3.0282e-06	6.86182	2.67125e-07	8.88392e-06	5.04357	9.95218e-09	2.57789e-07	PF00046:Homeobox domain	Homeobox
BnaC01g00960D	-12.094	3.5113e-19	6.32509e-17	-6.19053	0.0010336	0.0141867	-7.78057	2.58865e-13	1.36386e-11	PF00046:Homeobox domain|PF02183:Homeobox associated leucine zipper	HALZ
BnaA06g39210D	-2.08257	0.00340347	0.0340753	-2.08618	0.024496	0.201042	-2.69595	2.25445e-25	4.15404e-23	PF00046:Homeobox domain|PF02183:Homeobox associated leucine zipper	HALZ
BnaA08g27880D	-1.05915	0.000446497	0.00579204	-0.762987	0.0264204	0.213132	-1.03848	8.68753e-09	2.27189e-07	PF00056:lactate/malate dehydrogenase, NAD binding domain|PF02866:lactate/malate dehydrogenase, alpha/beta C-terminal domain	-
BnaC01g40760D	-8.37764	1.87645e-10	7.97563e-09	-4.37566	3.35243e-07	1.09065e-05	-4.91783	3.34948e-08	7.8988e-07	PF00063:Myosin head (motor domain)	Myosin_head
BnaC01g04980D	-6.03482	1.22462e-07	3.25343e-06	-8.03196	7.26531e-10	4.20555e-08	-6.67401	7.43556e-07	1.36527e-05	PF00063:Myosin head (motor domain)|PF02736:Myosin N-terminal SH3-like domain	Myosin_head
BnaC01g02400D	-9.03111	4.2575e-33	3.62372e-30	-5.36649	2.66734e-08	1.1014e-06	-6.51313	0.00327974	0.0249164	PF00067:Cytochrome P450	p450
BnaC01g01490D	-8.54867	1.04478e-10	4.6255e-09	-6.07468	3.05228e-13	3.69229e-11	-6.84653	3.36784e-14	2.00281e-12	PF00067:Cytochrome P450	p450
BnaC01g01590D	-8.3999	4.62284e-11	2.16043e-09	-5.4722	1.26798e-07	4.54237e-06	-6.54992	1.25983e-08	3.19771e-07	PF00067:Cytochrome P450	p450
BnaC06g25040D	-8.14574	5.0996e-10	2.02944e-08	-4.85061	9.89143e-11	6.94219e-09	-7.68592	5.39528e-09	1.46022e-07	PF00067:Cytochrome P450	p450
BnaC01g01580D	-6.56813	1.07704e-05	0.000198799	-5.68877	0.00243723	0.0297182	-6.29707	8.71978e-06	0.000128259	PF00067:Cytochrome P450	p450
BnaC03g59160D	-6.49532	8.65983e-06	0.000162933	-6.23584	2.05646e-05	0.000445535	-7.22132	7.70163e-08	1.70034e-06	PF00067:Cytochrome P450	p450
BnaC05g39060D	-6.35259	3.31597e-06	6.73792e-05	-7.32049	1.96338e-07	6.7683e-06	-4.33402	6.29907e-06	9.58583e-05	PF00067:Cytochrome P450	p450
BnaC01g00800D	-4.22275	4.83948e-11	2.25702e-09	-3.58748	5.22053e-08	2.03693e-06	-3.41384	1.46455e-42	1.04007e-39	PF00067:Cytochrome P450	p450
BnaC07g35800D	-3.02187	2.71505e-12	1.57471e-10	-2.314	3.67591e-08	1.47648e-06	-2.46558	1.10647e-13	6.15289e-12	PF00067:Cytochrome P450	p450
BnaC01g01540D	-2.93755	9.74456e-06	0.000181289	-2.83469	0.0246244	0.201758	-3.02589	9.06021e-09	2.363e-07	PF00067:Cytochrome P450	p450
BnaC03g61440D	-2.76644	6.02868e-06	0.000116818	-1.37675	0.0356101	0.266562	-1.98486	2.44375e-06	4.04873e-05	PF00067:Cytochrome P450	p450
BnaC02g37450D	-2.32279	3.9917e-05	0.000656678	-1.92185	0.00533985	0.0578526	-2.26209	6.96558e-08	1.55237e-06	PF00067:Cytochrome P450	p450
BnaA05g34230D	-2.08378	0.00125928	0.0144183	-1.96917	0.0349418	0.263049	-1.67888	0.00183051	0.0150448	PF00067:Cytochrome P450	p450
BnaC05g42450D	-1.53444	0.00416762	0.0405628	-0.992687	0.331506	0.992765	-1.84345	0.000599546	0.00566445	PF00067:Cytochrome P450	p450
BnaA07g15980D	1.6113	0.00179994	0.0196725	1.83658	0.000563429	0.00838311	1.21791	0.000747407	0.00687562	PF00067:Cytochrome P450	p450
BnaA09g51710D	1.97021	6.17845e-06	0.000119482	1.56479	0.0222062	0.185642	1.43265	1.22265e-06	2.15666e-05	PF00067:Cytochrome P450	p450
BnaC07g51130D	2.01559	0.000394629	0.00518539	1.79554	2.41801e-05	0.000513259	2.2614	4.5057e-07	8.67007e-06	PF00067:Cytochrome P450	p450
BnaA01g00600D	2.46601	1.116e-06	2.49391e-05	2.27121	0.000796442	0.0113042	1.84739	4.01128e-07	7.78903e-06	PF00067:Cytochrome P450	p450
BnaC07g15980D	2.48518	0.000159923	0.00229732	1.75158	0.0508329	0.34719	1.59616	2.12879e-05	0.000286087	PF00067:Cytochrome P450	p450
BnaC09g01820D	3.03015	1.1765e-07	3.14031e-06	2.72252	0.000226436	0.00373642	2.9924	3.90241e-31	1.16145e-28	PF00067:Cytochrome P450	p450
BnaC03g50910D	3.25275	1.53807e-10	6.62422e-09	2.69856	0.0253852	0.206497	2.72032	5.60794e-13	2.84681e-11	PF00067:Cytochrome P450	p450
BnaCnng69760D	5.48279	0.00433582	0.0419839	2.81891	0.0816458	0.484362	3.54223	0.0216607	0.119836	PF00067:Cytochrome P450	p450
BnaC04g35220D	6.15599	7.84505e-08	2.16354e-06	4.91343	1.46583e-07	5.1916e-06	5.53554	3.30919e-13	1.72879e-11	PF00067:Cytochrome P450	p450
BnaA08g15660D	7.83174	7.53944e-12	4.09058e-10	5.84539	0.000148432	0.00257026	4.58461	5.61806e-16	4.2416e-14	PF00067:Cytochrome P450	p450
BnaC01g05800D	-10.2665	2.30667e-16	2.68944e-14	-6.25184	5.20327e-12	4.85736e-10	-6.30228	8.43209e-30	2.25438e-27	PF00069:Protein kinase domain	Pkinase
BnaC01g05580D	-9.95732	1.09407e-15	1.15141e-13	-5.93897	2.12499e-08	9.02397e-07	-5.49761	0.00537587	0.0381697	PF00069:Protein kinase domain	Pkinase
BnaC03g49250D	-8.59157	2.26051e-11	1.13594e-09	-6.43757	2.93927e-11	2.31337e-09	-8.82848	9.54114e-13	4.69998e-11	PF00069:Protein kinase domain	Pkinase
BnaC01g06450D	-8.06555	4.08502e-10	1.6537e-08	-6.73555	7.19837e-09	3.3284e-07	-5.62551	9.43097e-07	1.69603e-05	PF00069:Protein kinase domain	Pkinase
BnaC03g71490D	-7.43335	7.55993e-07	1.74319e-05	-8.15419	2.73208e-08	1.12408e-06	-6.98744	4.7711e-07	9.10878e-06	PF00069:Protein kinase domain	Pkinase
BnaC05g42590D	-7.3588	2.07053e-08	6.30238e-07	-6.75181	2.44263e-07	8.19499e-06	-5.92585	7.79068e-06	0.000116146	PF00069:Protein kinase domain	Pkinase
BnaCnng62860D	-6.77693	3.52451e-07	8.61406e-06	-5.29392	7.36934e-05	0.00139145	-3.99664	3.9577e-12	1.77164e-10	PF00069:Protein kinase domain	Pkinase
BnaCnng24360D	-6.75755	2.01863e-06	4.27397e-05	-6.19767	5.46126e-05	0.00105851	-5.95927	7.1646e-06	0.00010766	PF00069:Protein kinase domain	Pkinase
BnaC05g43190D	-6.17251	3.08675e-09	1.06799e-07	-4.99156	1.50486e-05	0.000335492	-8.526	5.86917e-11	2.17584e-09	PF00069:Protein kinase domain	Pkinase
BnaC05g46960D	-6.14686	4.61471e-13	3.07155e-11	-5.66097	1.31813e-16	2.95504e-14	-5.12599	1.40587e-20	1.73008e-18	PF00069:Protein kinase domain	Pkinase
BnaA03g29820D	-6.10872	4.69825e-05	0.00076205	-3.92057	0.00425641	0.0479361	-3.32059	0.000308556	0.00314724	PF00069:Protein kinase domain	Pkinase
BnaA07g26070D	-6.0691	4.22546e-09	1.4266e-07	-3.75113	NA	1	-7.13111	7.67401e-11	2.80077e-09	PF00069:Protein kinase domain	Pkinase
BnaC05g47030D	-5.84598	0.00043293	0.00563321	-5.73588	0.000186453	0.00314461	-5.12592	0.00179281	0.0147759	PF00069:Protein kinase domain	Pkinase
BnaA06g01400D	-5.84293	9.17082e-05	0.00139823	-2.69181	0.087182	0.504784	-3.24324	0.0131942	0.0806103	PF00069:Protein kinase domain	Pkinase
BnaAnng30910D	-5.84063	6.10602e-13	3.9939e-11	-6.63678	7.89012e-11	5.65898e-09	-4.47924	1.96838e-15	1.3792e-13	PF00069:Protein kinase domain	Pkinase
BnaC01g03090D	-5.65847	7.44784e-24	2.52304e-21	-5.10825	2.09408e-19	7.65341e-17	-5.91463	2.34377e-24	3.96498e-22	PF00069:Protein kinase domain	Pkinase
BnaC08g48660D	-5.29857	1.50647e-27	7.22375e-25	-4.79553	1.63797e-27	2.04627e-24	-5.1157	2.26705e-22	3.26072e-20	PF00069:Protein kinase domain	Pkinase
BnaC05g46740D	-5.28692	8.2558e-36	9.06686e-33	-4.24556	1.4912e-07	5.26519e-06	-4.38828	5.06465e-23	7.69014e-21	PF00069:Protein kinase domain	Pkinase
BnaC05g43850D	-4.87128	6.77132e-17	8.5541e-15	-4.48904	1.82735e-16	4.05022e-14	-3.9838	2.59851e-47	3.22101e-44	PF00069:Protein kinase domain	Pkinase
BnaC05g43230D	-4.85292	8.17228e-10	3.13145e-08	-3.67228	0.00353433	0.0408493	-5.30924	2.72202e-15	1.85762e-13	PF00069:Protein kinase domain	Pkinase
BnaC05g47610D	-4.14757	1.40631e-09	5.16211e-08	-4.4432	4.88481e-08	1.91682e-06	-3.58719	2.74361e-10	9.20062e-09	PF00069:Protein kinase domain	Pkinase
BnaA03g23970D	-3.76149	0.00150703	0.016847	-2.67351	0.0578799	0.381589	-6.20971	1.5907e-05	0.000220556	PF00069:Protein kinase domain	Pkinase
BnaC08g28750D	-3.69127	0.000932415	0.0111073	-2.79518	0.0461549	0.324598	-4.30261	0.000129818	0.00146313	PF00069:Protein kinase domain	Pkinase
BnaC05g45800D	-3.66292	5.45942e-09	1.81512e-07	-3.81435	1.59567e-08	6.96116e-07	-3.61168	2.12699e-17	1.86388e-15	PF00069:Protein kinase domain	Pkinase
BnaC05g37430D	-3.30549	1.42792e-05	0.000257696	-2.59604	0.00157479	0.0204235	-2.78845	0.000226992	0.00240675	PF00069:Protein kinase domain	Pkinase
BnaC01g03870D	-2.9167	5.59316e-08	1.58224e-06	-4.81879	2.06359e-09	1.07091e-07	-4.53207	1.60415e-14	9.9422e-13	PF00069:Protein kinase domain	Pkinase
BnaA07g19110D	-2.66959	6.06235e-10	2.37373e-08	-2.52034	9.97732e-07	2.92967e-05	-3.22529	5.52273e-51	9.65431e-48	PF00069:Protein kinase domain	Pkinase
BnaA09g02320D	-2.50303	0.00173331	0.0190383	-1.4362	0.00552267	0.0595422	-2.04045	0.00072072	0.00665526	PF00069:Protein kinase domain	Pkinase
BnaA08g24650D	-2.48863	2.71459e-05	0.000462908	-1.88206	0.00525879	0.0570853	-2.21607	2.00127e-06	3.38054e-05	PF00069:Protein kinase domain	Pkinase
BnaC01g00890D	-2.37961	3.01697e-07	7.45386e-06	-1.60173	0.0160609	0.143392	-1.52918	1.23659e-08	3.14573e-07	PF00069:Protein kinase domain	Pkinase
BnaC06g40370D	-2.3189	0.000233624	0.00324382	-2.68489	0.000894375	0.012526	-1.9343	0.000240322	0.00252921	PF00069:Protein kinase domain	Pkinase
BnaC06g35250D	-2.26108	1.74456e-09	6.31734e-08	-2.14243	1.48061e-05	0.000330838	-2.02158	4.33891e-18	4.16634e-16	PF00069:Protein kinase domain	Pkinase
BnaA01g32300D	-1.93047	0.000109044	0.00162791	-2.34352	0.000199009	0.00333266	-1.45877	1.78059e-06	3.04169e-05	PF00069:Protein kinase domain	Pkinase
BnaA02g35130D	-1.89623	0.000209704	0.00293625	-1.47613	0.00152435	0.0198845	-1.64801	6.89123e-05	0.000824239	PF00069:Protein kinase domain	Pkinase
BnaC05g33820D	-1.84878	1.07662e-08	3.42081e-07	-1.16469	0.00820901	0.0832042	-1.78887	9.62734e-10	2.94593e-08	PF00069:Protein kinase domain	Pkinase
BnaA06g28950D	-1.7335	0.000911368	0.0108737	-1.02217	0.022868	0.190179	-0.746715	0.0404862	0.194188	PF00069:Protein kinase domain	Pkinase
BnaA09g00050D	-1.53995	1.66723e-05	0.000296715	-0.90436	0.0438462	0.31294	-1.01419	0.000282312	0.00291223	PF00069:Protein kinase domain	Pkinase
BnaC05g50100D	-1.38286	2.16017e-05	0.000376185	-1.26104	6.48502e-06	0.000156024	-1.04373	5.57254e-06	8.59338e-05	PF00069:Protein kinase domain	Pkinase
BnaA09g09520D	-1.30695	2.77941e-05	0.000473369	-0.879054	0.00999665	0.0977611	-1.02195	9.02995e-05	0.0010547	PF00069:Protein kinase domain	Pkinase
BnaA03g21350D	-1.28302	0.00015134	0.00218371	-1.44348	0.000599408	0.00884564	-1.25026	0.0268496	0.142219	PF00069:Protein kinase domain	Pkinase
BnaA01g30790D	-1.21232	0.00516318	0.0485857	-1.11505	0.00410381	0.0464842	-0.996051	1.12723e-07	2.4144e-06	PF00069:Protein kinase domain	Pkinase
BnaA09g21830D	-1.18827	0.00514678	0.0484431	-1.00261	0.00550261	0.0593632	-0.945055	0.000626009	0.00587781	PF00069:Protein kinase domain	Pkinase
BnaC04g32540D	-1.16095	0.00167541	0.0184896	-1.05328	0.000104522	0.00189091	-0.890679	0.00163744	0.0136528	PF00069:Protein kinase domain	Pkinase
BnaA09g19610D	-1.0138	0.00102411	0.0120374	-0.915177	3.58835e-05	0.000728704	-0.911593	0.000109239	0.00125126	PF00069:Protein kinase domain	Pkinase
BnaC03g38000D	0.962088	5.4867e-06	0.000107262	0.708234	0.0599553	0.391218	0.862848	0.000242524	0.00254806	PF00069:Protein kinase domain	Pkinase
BnaA06g12330D	0.967779	0.00120222	0.0138512	0.819707	0.00280926	0.0335636	0.729471	0.00578242	0.0406038	PF00069:Protein kinase domain	Pkinase
BnaA01g07170D	1.0699	0.0023207	0.0244497	1.01515	0.00538308	0.0582475	0.862663	0.000283408	0.00292265	PF00069:Protein kinase domain	Pkinase
BnaA05g32100D	1.1127	0.000975582	0.0115528	0.923238	0.00025706	0.00418639	0.990476	8.52254e-07	1.54901e-05	PF00069:Protein kinase domain	Pkinase
BnaC01g09880D	1.1321	0.000500233	0.00639169	0.816849	0.079998	0.477846	0.892441	4.49941e-06	7.07128e-05	PF00069:Protein kinase domain	Pkinase
BnaA01g03800D	1.14561	0.0031422	0.0317724	1.03925	0.0275598	0.220318	1.07017	9.05513e-06	0.000132591	PF00069:Protein kinase domain	Pkinase
BnaA10g16430D	1.19971	0.0026251	0.0271609	1.21065	0.0129838	0.120739	0.888002	0.000781499	0.00715328	PF00069:Protein kinase domain	Pkinase
BnaA05g31460D	1.34289	0.00110562	0.012882	1.08035	0.000756363	0.0108068	1.45556	9.96971e-12	4.18789e-10	PF00069:Protein kinase domain	Pkinase
BnaC08g19860D	1.3544	0.00103299	0.0121334	1.01864	0.280312	0.942994	0.709069	0.149957	0.472913	PF00069:Protein kinase domain	Pkinase
BnaC08g17690D	1.40478	0.00041173	0.00538619	1.08784	0.00671244	0.0702531	1.42568	2.19842e-05	0.000294864	PF00069:Protein kinase domain	Pkinase
BnaA05g37270D	1.65084	0.00212686	0.0226848	2.04989	1.7712e-06	4.87381e-05	2.39307	1.6258e-21	2.19053e-19	PF00069:Protein kinase domain	Pkinase
BnaA03g28850D	1.99745	6.25499e-05	0.0009921	1.57421	0.00292131	0.0347212	1.38326	5.92073e-06	9.06471e-05	PF00069:Protein kinase domain	Pkinase
BnaA01g08020D	2.12449	2.67241e-05	0.000455943	2.07821	3.16005e-05	0.000651446	2.50874	9.54731e-21	1.19127e-18	PF00069:Protein kinase domain	Pkinase
BnaC04g35630D	2.33936	4.11787e-22	1.12156e-19	2.01224	1.57455e-13	2.03743e-11	2.10568	1.61836e-23	2.55402e-21	PF00069:Protein kinase domain	Pkinase
BnaC04g46100D	2.49515	7.78381e-07	1.7881e-05	2.26473	5.2603e-05	0.00102303	2.12346	5.45867e-09	1.47503e-07	PF00069:Protein kinase domain	Pkinase
BnaC01g39350D	2.56804	1.67257e-06	3.60403e-05	1.5758	0.00235565	0.028872	3.2628	3.83848e-13	1.98703e-11	PF00069:Protein kinase domain	Pkinase
BnaA07g23470D	4.0441	0.000520278	0.00662172	3.4436	2.74471e-05	0.000575317	3.24584	1.62299e-05	0.000224439	PF00069:Protein kinase domain	Pkinase
BnaC02g44030D	4.78306	3.36693e-18	5.24618e-16	7.35696	4.73299e-11	3.56974e-09	4.78148	9.81833e-15	6.22096e-13	PF00069:Protein kinase domain	Pkinase
BnaC03g42860D	5.83716	0.000110068	0.0016414	5.81701	0.000184243	0.00310964	5.58418	0.000483876	0.00468168	PF00069:Protein kinase domain	Pkinase
BnaA01g04900D	6.02922	8.14396e-05	0.00125374	7.52015	0.0544128	0.365001	7.40926	6.77439e-08	1.51377e-06	PF00069:Protein kinase domain	Pkinase
BnaA07g22580D	8.31752	1.3013e-10	5.66178e-09	8.24269	5.90319e-10	3.50266e-08	5.09718	1.87844e-10	6.45811e-09	PF00069:Protein kinase domain	Pkinase
BnaC01g39340D	8.44866	1.299e-20	2.86247e-18	9.40954	3.3317e-12	3.23782e-10	5.67368	1.01766e-37	5.37832e-35	PF00069:Protein kinase domain	Pkinase
BnaCnng22980D	10.8914	7.57402e-24	2.55308e-21	9.53	2.31172e-35	8.35991e-32	7.41093	0.000276753	0.00286224	PF00069:Protein kinase domain	Pkinase
BnaC08g17660D	-2.10424	0.00432097	0.041852	-0.957996	0.467748	0.999967	-0.801974	0.438561	0.798932	PF00069:Protein kinase domain|PF00139:Legume lectin domain	Pkinase
BnaA10g08120D	-6.52899	0.000429095	0.00559117	-4.93682	0.00535341	0.0579812	-3.11272	0.297078	1	PF00069:Protein kinase domain|PF00582:Universal stress protein family|PF04564:U-box domain	Pkinase
BnaC01g06190D	-9.70937	7.45022e-13	4.73663e-11	-5.1641	5.01289e-07	1.5649e-05	-7.16041	1.86708e-15	1.31227e-13	PF00069:Protein kinase domain|PF01453:D-mannose binding lectin	Pkinase
BnaCnng49020D	-2.54036	0.00060287	0.00753765	-2.26445	0.00204348	0.0255331	-2.18845	0.00125962	0.0108731	PF00069:Protein kinase domain|PF01657:Salt stress response/antifungal	Pkinase
BnaC05g48600D	-2.18	2.40791e-05	0.000414348	-1.5366	0.000207383	0.00345605	-1.58664	3.89286e-07	7.57636e-06	PF00069:Protein kinase domain|PF02149:Kinase associated domain 1	Pkinase
BnaA01g33280D	7.89876	4.20716e-13	2.8098e-11	5.54594	8.95949e-08	3.32221e-06	9.87225	5.66443e-16	4.27188e-14	PF00069:Protein kinase domain|PF02149:Kinase associated domain 1|PF00627:UBA/TS-N domain	Pkinase
BnaA02g07660D	-3.26727	0.00458345	0.0440062	-4.10803	0.0275581	0.220318	-4.71503	0.0334624	0.167918	PF00069:Protein kinase domain|PF03822:NAF domain	Pkinase
BnaA07g15430D	3.73909	1.3104e-08	4.10993e-07	4.20881	4.65315e-12	4.39173e-10	3.63559	2.31798e-18	2.29696e-16	PF00069:Protein kinase domain|PF08038:TOM7 family	Pkinase
BnaA01g02910D	1.62399	0.00322446	0.0325077	1.61282	0.0847779	0.496128	0.720146	0.0619059	0.26421	PF00069:Protein kinase domain|PF08263:Leucine rich repeat N-terminal domain	Pkinase
BnaC03g50640D	-2.83385	0.00256456	0.0266438	-2.53211	0.000292048	0.00470054	-2.49658	1.51066e-12	7.23756e-11	PF00069:Protein kinase domain|PF08263:Leucine rich repeat N-terminal domain|PF13855:Leucine rich repeat	Pkinase
BnaA09g07170D	-1.57804	2.18694e-05	0.000380263	-1.38629	0.000709475	0.0102455	-1.0599	0.00268511	0.020998	PF00069:Protein kinase domain|PF08263:Leucine rich repeat N-terminal domain|PF13855:Leucine rich repeat	Pkinase
BnaC03g05930D	-1.58962	2.21602e-09	7.83848e-08	-1.77501	5.19088e-05	0.0010121	-1.86487	6.74978e-20	7.72103e-18	PF00069:Protein kinase domain|PF12796:Ankyrin repeats (3 copies)|PF13637:Ankyrin repeats (many copies)|PF13445:RING-type zinc-finger	Pkinase
BnaA04g18590D	-4.65013	9.44899e-09	3.03058e-07	-3.24179	7.03462e-10	4.08233e-08	-3.06849	3.84179e-14	2.26965e-12	PF00069:Protein kinase domain|PF13855:Leucine rich repeat	Pkinase
BnaC07g21070D	2.63816	0.00167281	0.0184668	2.8823	3.01876e-06	7.83008e-05	3.70847	2.71399e-33	9.58699e-31	PF00069:Protein kinase domain|PF13855:Leucine rich repeat|PF08263:Leucine rich repeat N-terminal domain	Pkinase
BnaA05g33240D	4.38878	4.4608e-20	9.0399e-18	4.47573	8.78261e-22	5.07104e-19	4.79983	2.11716e-65	9.62261e-62	PF00069:Protein kinase domain|PF13855:Leucine rich repeat|PF08263:Leucine rich repeat N-terminal domain	Pkinase
BnaAnng26810D	-1.23194	0.00137833	0.015574	-1.8677	3.49451e-05	0.000712274	-1.08297	0.00384035	0.0285518	PF00069:Protein kinase domain|PF14593:PH domain	Pkinase
BnaC01g00840D	-10.7803	6.83066e-18	1.0111e-15	-6.74074	2.56008e-11	2.05735e-09	-7.44382	8.80907e-08	1.91997e-06	PF00071:Ras family	Ras
BnaC02g46370D	-6.54304	8.5066e-06	0.000160183	-5.83802	0.00016585	0.00283401	-5.43188	0.000526104	0.00504468	PF00071:Ras family	Ras
BnaC02g46360D	-5.26573	0.000230313	0.00320177	-3.6683	0.00321692	0.037655	-6.42959	6.90551e-06	0.000104134	PF00071:Ras family	Ras
BnaA09g17520D	-1.70592	1.98282e-10	8.38146e-09	-1.83496	7.21271e-07	2.17648e-05	-1.82954	4.71988e-10	1.52431e-08	PF00071:Ras family	Ras
BnaA08g08340D	-1.48865	6.81383e-08	1.89837e-06	-1.30234	0.000609005	0.00897186	-1.27352	7.92387e-08	1.74489e-06	PF00071:Ras family	Ras
BnaA02g07230D	-1.41865	0.000138258	0.00201243	-1.26266	0.00601076	0.0639614	-1.38896	2.62797e-05	0.000346747	PF00071:Ras family	Ras
BnaAnng21250D	-1.28156	0.000431791	0.00562269	-1.12552	0.0138654	0.127274	-1.20359	5.1589e-08	1.18143e-06	PF00071:Ras family	Ras
BnaA03g02850D	-1.09462	0.00324597	0.0327051	-0.913908	0.0944845	0.530221	-1.15306	6.16087e-07	1.1498e-05	PF00071:Ras family	Ras
BnaA09g07020D	-1.01985	0.00295054	0.0301027	-0.98666	0.00179526	0.0228219	-0.962472	5.36117e-05	0.000656908	PF00071:Ras family	Ras
BnaAnng31680D	1.12122	4.00009e-06	7.99442e-05	0.954474	0.00277779	0.0332247	1.1161	3.68641e-10	1.21062e-08	PF00071:Ras family	Ras
BnaA08g02800D	1.41153	9.63105e-09	3.08026e-07	1.36984	3.72973e-07	1.19864e-05	1.11008	1.4931e-10	5.21483e-09	PF00071:Ras family	Ras
BnaUnng03720D	1.48709	0.00459002	0.0440568	1.59327	0.00301064	0.0356043	0.866715	0.0756988	0.303972	PF00071:Ras family	Ras
BnaC09g06850D	8.18101	1.55443e-18	2.55043e-16	7.85969	1.27042e-17	3.35732e-15	6.24414	4.23111e-30	1.15384e-27	PF00071:Ras family	Ras
BnaC01g06500D	-6.07254	4.63299e-05	0.000752964	-5.31963	0.00116249	0.015711	-2.32537	0.560822	1	PF00072:Response regulator receiver domain	Response_reg
BnaA05g01090D	2.07705	0.000145289	0.00210724	1.8133	0.000375197	0.00587775	1.76603	0.0083577	0.0553198	PF00072:Response regulator receiver domain	Response_reg
BnaC05g47680D	-10.863	1.92285e-18	3.10258e-16	-7.24002	1.78459e-27	2.18963e-24	-5.45774	0.00887931	0.0581648	PF00076:RNA recognition motif. (a.k.a. RRM, RBD, or RNP domain)	RRM_1
BnaA08g02930D	-10.0497	2.23981e-20	4.8263e-18	-5.62575	4.16361e-07	1.32621e-05	-7.63805	1.27102e-08	3.2213e-07	PF00076:RNA recognition motif. (a.k.a. RRM, RBD, or RNP domain)	RRM_1
BnaA09g22470D	-9.99294	1.4875e-15	1.53929e-13	-5.17873	2.16701e-05	0.000466757	-6.5101	2.97236e-06	4.85258e-05	PF00076:RNA recognition motif. (a.k.a. RRM, RBD, or RNP domain)	RRM_1
BnaC05g42710D	-8.50382	4.04224e-11	1.91405e-09	-5.62871	1.62976e-08	7.07843e-07	-7.99877	2.99509e-10	9.99966e-09	PF00076:RNA recognition motif. (a.k.a. RRM, RBD, or RNP domain)	RRM_1
BnaAnng32590D	-7.34766	6.51299e-08	1.82126e-06	-4.38438	9.86552e-06	0.000229239	-5.12418	1.76595e-07	3.63685e-06	PF00076:RNA recognition motif. (a.k.a. RRM, RBD, or RNP domain)	RRM_1
BnaC06g20120D	-6.35233	1.33832e-05	0.000243071	-5.4089	0.000106437	0.00192	-6.56944	3.36801e-06	5.44374e-05	PF00076:RNA recognition motif. (a.k.a. RRM, RBD, or RNP domain)	RRM_1
BnaC01g02880D	-6.35224	1.01406e-24	3.71229e-22	-4.43071	1.27154e-06	3.63274e-05	-3.92138	4.5556e-16	3.48187e-14	PF00076:RNA recognition motif. (a.k.a. RRM, RBD, or RNP domain)	RRM_1
BnaC04g07000D	-5.22179	0.000258789	0.00355267	-3.61721	0.00164077	0.0211356	-3.60525	0.00359801	0.0269882	PF00076:RNA recognition motif. (a.k.a. RRM, RBD, or RNP domain)	RRM_1
BnaCnng78180D	-4.75295	8.00036e-05	0.00123407	-4.10096	0.000288932	0.00465256	-2.81618	0.00861338	0.0567313	PF00076:RNA recognition motif. (a.k.a. RRM, RBD, or RNP domain)	RRM_1
BnaC03g08050D	-1.99907	1.16155e-10	5.10264e-09	-2.01696	2.99105e-05	0.000621078	-1.89562	2.17448e-16	1.71384e-14	PF00076:RNA recognition motif. (a.k.a. RRM, RBD, or RNP domain)	RRM_1
BnaC03g40810D	-1.76942	8.8382e-08	2.41687e-06	-1.79631	7.9862e-05	0.00148979	-2.04777	2.37074e-20	2.84056e-18	PF00076:RNA recognition motif. (a.k.a. RRM, RBD, or RNP domain)	RRM_1
BnaA08g00110D	-1.76159	0.00113041	0.0131395	-2.16846	1.16733e-05	0.000266912	-1.73538	0.00947286	0.0613943	PF00076:RNA recognition motif. (a.k.a. RRM, RBD, or RNP domain)	RRM_1
BnaC04g06960D	-1.53184	2.38636e-05	0.000411262	-1.01208	0.0441469	0.3144	-1.12238	0.000507034	0.00488105	PF00076:RNA recognition motif. (a.k.a. RRM, RBD, or RNP domain)	RRM_1
BnaAnng01000D	-1.43188	0.000145298	0.00210724	-2.02399	0.000165211	0.00282519	-1.28389	1.65566e-05	0.000228217	PF00076:RNA recognition motif. (a.k.a. RRM, RBD, or RNP domain)	RRM_1
BnaA06g35870D	-1.29207	0.00258063	0.0267862	-2.06335	0.00115289	0.0155997	-1.42869	0.000275739	0.00285263	PF00076:RNA recognition motif. (a.k.a. RRM, RBD, or RNP domain)	RRM_1
BnaA09g18380D	-1.02325	0.000599746	0.00750272	-1.15967	0.0553839	0.369746	-0.921032	0.000871248	0.00785795	PF00076:RNA recognition motif. (a.k.a. RRM, RBD, or RNP domain)	RRM_1
BnaA04g10360D	-1.01708	1.38465e-05	0.000250684	-0.757202	0.00922865	0.0914085	-0.815687	0.000119337	0.00135553	PF00076:RNA recognition motif. (a.k.a. RRM, RBD, or RNP domain)	RRM_1
BnaA03g03810D	0.748592	0.00293143	0.0299263	0.840067	0.00972322	0.0955496	0.96838	1.65149e-05	0.000227827	PF00076:RNA recognition motif. (a.k.a. RRM, RBD, or RNP domain)	RRM_1
BnaA05g32940D	0.863093	0.000407939	0.00534173	0.861273	0.00834035	0.0843115	1.13082	4.98421e-09	1.35524e-07	PF00076:RNA recognition motif. (a.k.a. RRM, RBD, or RNP domain)	RRM_1
BnaA05g29840D	0.886019	4.65317e-05	0.000755818	0.944347	0.000347013	0.00547617	0.725129	0.00011676	0.00133025	PF00076:RNA recognition motif. (a.k.a. RRM, RBD, or RNP domain)	RRM_1
BnaC04g32650D	0.91697	0.000470595	0.00606306	1.04001	0.00419157	0.0473144	0.963853	7.75113e-07	1.41825e-05	PF00076:RNA recognition motif. (a.k.a. RRM, RBD, or RNP domain)	RRM_1
BnaA10g09870D	0.924927	0.000470859	0.00606532	1.51465	0.000213572	0.003548	0.9342	0.000131011	0.00147438	PF00076:RNA recognition motif. (a.k.a. RRM, RBD, or RNP domain)	RRM_1
BnaC02g43850D	0.929485	0.000545508	0.00691183	0.901055	0.0139593	0.128005	0.706257	0.00640439	0.044324	PF00076:RNA recognition motif. (a.k.a. RRM, RBD, or RNP domain)	RRM_1
BnaA08g17220D	1.00732	1.37766e-05	0.000249551	1.2846	2.83059e-05	0.000591155	1.25903	1.30923e-11	5.41285e-10	PF00076:RNA recognition motif. (a.k.a. RRM, RBD, or RNP domain)	RRM_1
BnaA03g35110D	1.41547	8.13474e-05	0.00125261	1.30992	0.00508506	0.0554799	1.04642	7.24845e-07	1.33523e-05	PF00076:RNA recognition motif. (a.k.a. RRM, RBD, or RNP domain)	RRM_1
BnaA08g24030D	1.57932	1.09885e-06	2.45962e-05	1.06967	0.0028368	0.0338338	1.00076	0.002692	0.0210326	PF00076:RNA recognition motif. (a.k.a. RRM, RBD, or RNP domain)	RRM_1
BnaAnng01640D	1.70369	6.67264e-05	0.00105344	2.64894	1.30274e-06	3.71109e-05	1.37794	7.94181e-05	0.000937097	PF00076:RNA recognition motif. (a.k.a. RRM, RBD, or RNP domain)	RRM_1
BnaA01g25360D	2.41317	0.00335792	0.0336835	1.9163	0.00163802	0.0211108	1.77596	9.30615e-06	0.000135916	PF00076:RNA recognition motif. (a.k.a. RRM, RBD, or RNP domain)	RRM_1
BnaC03g41110D	7.39931	3.16673e-08	9.31429e-07	7.27638	5.69324e-08	2.20633e-06	6.30997	2.63299e-06	4.33592e-05	PF00076:RNA recognition motif. (a.k.a. RRM, RBD, or RNP domain)	RRM_1
BnaC06g03980D	11.1976	7.93389e-26	3.1778e-23	7.64101	5.04901e-12	4.73285e-10	7.60979	1.63838e-07	3.39725e-06	PF00076:RNA recognition motif. (a.k.a. RRM, RBD, or RNP domain)	RRM_1
BnaC05g43360D	-10.8262	8.21712e-19	1.4237e-16	-5.83954	2.09176e-10	1.36491e-08	-5.67731	0.00649885	0.0448039	PF00076:RNA recognition motif. (a.k.a. RRM, RBD, or RNP domain)|PF00098:Zinc knuckle	RRM_1
BnaC03g74030D	1.62531	0.000986745	0.0116626	1.83667	0.00309	0.0363863	1.2266	0.00357945	0.0268724	PF00076:RNA recognition motif. (a.k.a. RRM, RBD, or RNP domain)|PF00203:Ribosomal protein S19	RRM_1
BnaA06g02900D	-1.39954	0.00243482	0.0254552	-1.34412	0.00236587	0.0289766	-1.53508	0.000708603	0.00655313	PF00076:RNA recognition motif. (a.k.a. RRM, RBD, or RNP domain)|PF00641:Zn-finger in Ran binding protein and others	RRM_1
BnaC01g38570D	9.63979	1.31581e-14	1.14082e-12	7.08121	5.72124e-14	8.10529e-12	7.93454	1.41227e-13	7.71098e-12	PF00076:RNA recognition motif. (a.k.a. RRM, RBD, or RNP domain)|PF01480:PWI domain	RRM_1
BnaA06g36440D	-5.35366	6.61609e-06	0.000127079	-3.005	0.000220044	0.00364056	-3.14421	7.32058e-06	0.000109786	PF00076:RNA recognition motif. (a.k.a. RRM, RBD, or RNP domain)|PF02136:Nuclear transport factor 2 (NTF2) domain	RRM_1
BnaA09g17920D	-1.19509	2.46626e-07	6.17844e-06	-1.00484	0.00187865	0.0237327	-1.08365	7.81786e-07	1.42893e-05	PF00076:RNA recognition motif. (a.k.a. RRM, RBD, or RNP domain)|PF05383:La domain	RRM_1
BnaC09g07820D	4.59599	3.22671e-37	3.85456e-34	4.07286	9.02883e-18	2.46179e-15	4.1056	6.82979e-53	1.36949e-49	PF00076:RNA recognition motif. (a.k.a. RRM, RBD, or RNP domain)|PF12220:U1 small nuclear ribonucleoprotein of 70kDa MW N terminal	RRM_1
BnaA07g25750D	-3.28505	2.38395e-23	7.7298e-21	-2.60033	2.56677e-09	1.30736e-07	-3.13681	3.28458e-31	9.90839e-29	PF00076:RNA recognition motif. (a.k.a. RRM, RBD, or RNP domain)|PF13865:C-terminal duplication domain of Friend of PRMT1	RRM_1
BnaA04g23680D	1.74642	1.60528e-07	4.17036e-06	1.78398	8.77453e-05	0.00162026	1.90069	2.37438e-08	5.7143e-07	PF00076:RNA recognition motif. (a.k.a. RRM, RBD, or RNP domain)|PF14259:RNA recognition motif (a.k.a. RRM, RBD, or RNP domain)	RRM_1
BnaAnng21170D	3.64323	5.16092e-05	0.000832533	2.11399	0.0128479	0.119797	1.6704	0.0157581	0.0929667	PF00082:Subtilase family	Peptidase_S8
BnaC04g38660D	9.77364	3.10383e-14	2.48055e-12	7.32527	1.89894e-21	1.01144e-18	7.37792	1.23147e-11	5.11618e-10	PF00082:Subtilase family|PF05922:Peptidase inhibitor I9	Peptidase_S8
BnaC05g45870D	-8.37038	2.84624e-11	1.39628e-09	-6.24766	1.1592e-08	5.17201e-07	-8.73488	6.34751e-13	3.18901e-11	PF00083:Sugar (and other) transporter	Sugar_tr
BnaCnng06220D	-6.98012	3.38312e-31	2.32687e-28	-3.89279	4.01359e-05	0.00080377	-6.80013	8.18576e-59	2.65749e-55	PF00083:Sugar (and other) transporter	Sugar_tr
BnaC05g46620D	-6.85478	8.56392e-07	1.95156e-05	-7.4107	3.55019e-07	1.15035e-05	-5.04359	0.00265632	0.0208062	PF00083:Sugar (and other) transporter	Sugar_tr
BnaC01g28090D	-6.14803	9.01686e-05	0.00137815	-3.69567	0.0158957	0.142157	-6.20745	2.32878e-05	0.000310516	PF00083:Sugar (and other) transporter	Sugar_tr
BnaA09g00530D	-5.91183	0.00010623	0.00159394	-6.05962	0.000116081	0.00207114	-7.10194	6.62674e-08	1.48516e-06	PF00083:Sugar (and other) transporter	Sugar_tr
BnaC05g46390D	-3.90135	0.000390464	0.00513561	-7.05284	5.0471e-05	0.000987714	-5.02884	0.00316709	0.0241764	PF00083:Sugar (and other) transporter	Sugar_tr
BnaC05g06460D	-3.72645	9.29056e-06	0.000173792	-3.05613	0.000150344	0.00260013	-2.32934	1.44014e-08	3.61498e-07	PF00083:Sugar (and other) transporter	Sugar_tr
BnaC09g39010D	-2.88852	3.95369e-05	0.000650896	-2.74457	2.0335e-08	8.66222e-07	-3.42496	3.87906e-15	2.58766e-13	PF00083:Sugar (and other) transporter	Sugar_tr
BnaA04g22280D	-1.69278	0.00385804	0.0380061	-1.37037	0.0580359	0.382398	-0.950982	0.00193579	0.0158167	PF00083:Sugar (and other) transporter	Sugar_tr
BnaA10g16170D	-1.45005	0.00054283	0.00688164	-1.33307	0.00568763	0.0611097	-1.84452	1.4818e-05	0.000206761	PF00083:Sugar (and other) transporter	Sugar_tr
BnaA06g36740D	3.04987	2.41167e-12	1.40955e-10	1.73893	0.00597273	0.0636278	1.31763	0.00205342	0.0166267	PF00083:Sugar (and other) transporter	Sugar_tr
BnaC03g31170D	5.24671	0.000309849	0.00417463	2.92673	0.043411	0.310382	4.08003	0.0020414	0.0165428	PF00083:Sugar (and other) transporter	Sugar_tr
BnaA05g06230D	8.18138	1.42691e-26	6.35032e-24	4.83698	9.76073e-05	0.00177988	5.27554	2.48264e-26	5.02244e-24	PF00083:Sugar (and other) transporter	Sugar_tr
BnaC01g01960D	-8.16619	1.97003e-09	7.04522e-08	-8.27861	4.53137e-10	2.75776e-08	-4.01445	8.11518e-06	0.000120353	PF00085:Thioredoxin	-
BnaC05g43860D	-6.10495	2.42396e-23	7.82227e-21	-5.12609	1.35204e-11	1.14894e-09	-4.79356	2.56375e-21	3.39391e-19	PF00085:Thioredoxin	-
BnaC06g36750D	-1.84808	0.00276967	0.0284664	-1.48132	0.130825	0.651141	-1.26942	0.0429066	0.202703	PF00085:Thioredoxin	-
BnaA06g02880D	-1.18366	0.0053161	0.0497976	-1.83693	0.00219531	0.0271343	-1.7644	3.61724e-06	5.80256e-05	PF00085:Thioredoxin	-
BnaA05g37170D	1.42379	3.67524e-05	0.00061007	1.29555	0.000104367	0.00188862	1.23413	1.45773e-05	0.000203693	PF00085:Thioredoxin	-
BnaA03g33840D	5.54928	0.00131004	0.0149068	3.91708	0.0341005	0.258757	1.43597	0.491192	0.831761	PF00085:Thioredoxin	-
BnaAnng19520D	6.3393	8.79318e-14	6.60857e-12	4.43088	2.73125e-10	1.74517e-08	5.94243	1.49153e-12	7.15671e-11	PF00085:Thioredoxin	-
BnaC07g36480D	-1.47362	0.000105574	0.00158479	-1.59877	2.33341e-06	6.21428e-05	-1.38734	2.03596e-09	5.92419e-08	PF00091:Tubulin/FtsZ family, GTPase domain|PF03953:Tubulin C-terminal domain	Tubulin
BnaC01g04390D	-9.98462	5.40905e-16	6.0181e-14	-7.75075	2.02358e-12	2.04171e-10	-6.94453	4.98522e-19	5.26933e-17	PF00097:Zinc finger, C3HC4 type (RING finger)	zf-C3HC4
BnaC05g46520D	-7.67339	3.32354e-08	9.74186e-07	-4.68968	2.21081e-05	0.000474554	-3.94479	9.6341e-06	0.000140086	PF00097:Zinc finger, C3HC4 type (RING finger)	zf-C3HC4
BnaC05g38640D	-7.04685	1.03988e-06	2.33838e-05	-4.1459	0.000646382	0.00945559	-3.89575	0.000754229	0.00692996	PF00097:Zinc finger, C3HC4 type (RING finger)	zf-C3HC4
BnaAnng34450D	-3.41179	0.00030403	0.00410605	-6.87949	1.70865e-06	4.72441e-05	-3.56951	2.02264e-05	0.000273277	PF00097:Zinc finger, C3HC4 type (RING finger)	zf-C3HC4
BnaA08g19010D	1.31093	0.000510365	0.00650773	1.43163	0.000791038	0.0112391	1.40215	3.00707e-05	0.000390643	PF00098:Zinc knuckle|PF00313:'Cold-shock' DNA-binding domain	zf-CCHC
BnaC01g40290D	-9.84966	2.24371e-13	1.56053e-11	-4.7293	7.28094e-05	0.00137702	-10.5687	3.07526e-18	2.99941e-16	PF00106:short chain dehydrogenase	adh_short
BnaC03g26320D	-6.25043	3.02061e-11	1.47862e-09	-3.53795	1.09769e-08	4.90713e-07	-4.39005	1.94496e-10	6.68009e-09	PF00106:short chain dehydrogenase	adh_short
BnaC05g45760D	-4.71516	3.2299e-13	2.19708e-11	-4.87077	8.26894e-15	1.36577e-12	-4.42632	9.64523e-28	2.19191e-25	PF00106:short chain dehydrogenase	adh_short
BnaC02g36330D	-4.39371	3.86247e-08	1.11859e-06	-3.08309	0.000138589	0.00241934	-3.13945	9.40134e-06	0.00013713	PF00106:short chain dehydrogenase	adh_short
BnaA03g22000D	-3.90137	2.56967e-05	0.000440069	-4.68469	8.83726e-05	0.00162982	-5.901	9.33654e-06	0.000136299	PF00106:short chain dehydrogenase	adh_short
BnaA02g00320D	-2.63532	0.00287988	0.0294568	-1.79654	0.0551256	0.368487	-3.20408	4.0411e-16	3.10254e-14	PF00106:short chain dehydrogenase	adh_short
BnaC05g21140D	-1.4349	2.20908e-07	5.59383e-06	-1.33653	7.54129e-08	2.85001e-06	-1.07838	9.33779e-07	1.6806e-05	PF00106:short chain dehydrogenase	adh_short
BnaC03g26340D	1.21111	0.00137414	0.0155364	1.18646	0.0154513	0.138851	0.897689	0.00361392	0.0270929	PF00106:short chain dehydrogenase	adh_short
BnaC03g75820D	1.54819	1.61608e-08	4.98145e-07	1.97296	4.30459e-10	2.62779e-08	1.84434	7.29615e-20	8.29037e-18	PF00106:short chain dehydrogenase	adh_short
BnaA10g15860D	5.56453	0.000359008	0.00475865	5.37431	0.00128438	0.0171525	4.6615	0.0205724	0.115038	PF00106:short chain dehydrogenase	adh_short
BnaC04g14160D	6.02322	0.000338698	0.00452025	2.85902	0.133215	0.658171	3.17004	0.143476	0.459495	PF00106:short chain dehydrogenase	adh_short
BnaA04g17120D	6.41534	7.86783e-05	0.00121731	4.31271	0.0134026	0.123838	3.46964	0.0974734	0.360709	PF00106:short chain dehydrogenase	adh_short
BnaA04g17060D	8.05159	3.50224e-10	1.43657e-08	6.45216	1.21216e-05	0.000276151	7.6504	6.8797e-09	1.82715e-07	PF00106:short chain dehydrogenase	adh_short
BnaA04g01160D	-3.41953	6.75554e-07	1.57101e-05	-3.17383	1.19497e-05	0.00027259	-2.18826	0.000552392	0.00527227	PF00107:Zinc-binding dehydrogenase	ADH_zinc_N
BnaA07g16880D	-2.44178	6.19418e-07	1.44987e-05	-1.69016	1.26582e-06	3.61792e-05	-1.32301	1.6166e-05	0.000223738	PF00107:Zinc-binding dehydrogenase	ADH_zinc_N
BnaC06g02710D	1.40887	8.79808e-05	0.00134835	1.60966	3.00458e-06	7.80214e-05	2.02685	1.4622e-17	1.31848e-15	PF00107:Zinc-binding dehydrogenase|PF00106:short chain dehydrogenase|PF16884:N-terminal domain of oxidoreductase	adh_short
BnaC01g04160D	-2.53871	8.42412e-06	0.000158806	-1.70837	0.151818	0.710684	-3.09759	6.74177e-13	3.37961e-11	PF00107:Zinc-binding dehydrogenase|PF08240:Alcohol dehydrogenase GroES-like domain	ADH_N
BnaC05g24910D	8.90953	7.33111e-12	3.9839e-10	7.00567	3.43894e-15	5.99719e-13	5.75866	1.10022e-06	1.95234e-05	PF00107:Zinc-binding dehydrogenase|PF08240:Alcohol dehydrogenase GroES-like domain	ADH_N
BnaA08g28040D	-2.4435	2.58661e-07	6.4562e-06	-2.63325	1.19415e-06	3.43592e-05	-2.21977	0.00234615	0.0186815	PF00108:Thiolase, N-terminal domain|PF02803:Thiolase, C-terminal domain	Thiolase_N
BnaC01g32050D	5.36543	0.00390011	0.0383483	4.55576	0.0201841	0.171852	4.7102	0.0104475	0.066586	PF00109:Beta-ketoacyl synthase, N-terminal domain	ketoacyl-synt
BnaC05g11990D	-7.64429	2.33712e-08	7.04619e-07	-6.37196	1.04744e-05	0.00024167	-5.52474	5.99871e-05	0.000726796	PF00112:Papain family cysteine protease	Peptidase_C1
BnaA08g21600D	-5.31795	1.81745e-36	2.13365e-33	-4.03875	5.24251e-14	7.54802e-12	-4.85586	1.87396e-42	1.2905e-39	PF00112:Papain family cysteine protease	Peptidase_C1
BnaA09g52180D	-1.0609	0.00270544	0.0278904	-0.951505	0.079772	0.476953	-0.744582	0.000510822	0.00491334	PF00112:Papain family cysteine protease|PF08127:Peptidase family C1 propeptide	Peptidase_C1
BnaC01g00170D	-3.87506	4.05056e-22	1.10766e-19	-4.70911	1.48428e-19	5.66582e-17	-4.27591	2.74358e-33	9.64157e-31	PF00112:Papain family cysteine protease|PF08246:Cathepsin propeptide inhibitor domain (I29)	Peptidase_C1
BnaC07g42720D	1.59512	7.25932e-06	0.000138419	0.868459	0.166608	0.747418	1.12638	0.000408611	0.00403439	PF00117:Glutamine amidotransferase class-I	GATase
BnaA01g06540D	3.03451	4.24567e-14	3.31148e-12	2.52997	0.00104099	0.014271	2.33517	6.18958e-24	1.01682e-21	PF00117:Glutamine amidotransferase class-I	GATase
BnaCnng75990D	-4.60066	2.22365e-11	1.11908e-09	-4.10464	3.02743e-16	6.54135e-14	-3.66598	7.93921e-19	8.2134e-17	PF00118:TCP-1/cpn60 chaperonin family	-
BnaC07g48190D	-4.44199	0.000760643	0.00927025	-4.42957	0.00206421	0.0257501	-4.24898	1.64714e-06	2.83503e-05	PF00118:TCP-1/cpn60 chaperonin family	-
BnaC03g07550D	-1.21613	4.19879e-07	1.00989e-05	-1.02122	0.00164535	0.0211787	-1.11392	5.19642e-09	1.40807e-07	PF00118:TCP-1/cpn60 chaperonin family	-
BnaA08g19100D	-1.06285	8.16497e-06	0.000154305	-0.748315	0.0284089	0.225532	-1.05675	2.94525e-06	4.81177e-05	PF00118:TCP-1/cpn60 chaperonin family	-
BnaA05g33440D	1.1269	0.00445215	0.0429454	1.05445	9.71228e-05	0.0017734	1.25486	7.69233e-08	1.69884e-06	PF00118:TCP-1/cpn60 chaperonin family	-
BnaA10g14670D	1.16681	8.60204e-07	1.95894e-05	1.07084	0.000175135	0.00297565	1.18694	1.30063e-09	3.90968e-08	PF00118:TCP-1/cpn60 chaperonin family	-
BnaAnng08540D	2.32939	0.00142909	0.0160548	1.71038	0.0111764	0.107163	1.52482	0.00211546	0.0170659	PF00118:TCP-1/cpn60 chaperonin family	-
BnaCnng76110D	2.58554	2.06347e-10	8.70531e-09	2.02531	3.09047e-07	1.01407e-05	2.77968	3.21651e-17	2.7688e-15	PF00118:TCP-1/cpn60 chaperonin family	-
BnaC03g37960D	4.98863	2.2388e-17	3.06108e-15	4.89356	2.74353e-12	2.71234e-10	4.904	1.29247e-26	2.68644e-24	PF00118:TCP-1/cpn60 chaperonin family	-
BnaA10g17910D	2.93864	0.0050323	0.0475578	2.50966	0.00023731	0.00389713	2.41757	0.0248848	0.133797	PF00120:Glutamine synthetase, catalytic domain|PF03951:Glutamine synthetase, beta-Grasp domain	-
BnaA01g07100D	1.16534	0.00144348	0.0162058	1.26555	0.00156487	0.0203102	1.21678	7.50979e-08	1.66284e-06	PF00122:E1-E2 ATPase|PF00690:Cation transporter/ATPase, N-terminus|PF00689:Cation transporting ATPase, C-terminus|PF12515:Ca2+-ATPase N terminal autoinhibitory domain|PF00702:haloacid dehalogenase-like hydrolase	Cation_ATPase_C
BnaA01g00660D	1.32986	0.000180791	0.00256037	1.36268	0.000165261	0.00282536	1.75571	2.48565e-15	1.71001e-13	PF00122:E1-E2 ATPase|PF00702:haloacid dehalogenase-like hydrolase	E1-E2_ATPase
BnaC01g00910D	-10.0241	1.31705e-30	8.64541e-28	-5.21081	5.05981e-07	1.57812e-05	-7.1901	6.07407e-05	0.000735061	PF00125:Core histone H2A/H2B/H3/H4	Histone
BnaAnng26750D	0.722136	0.00169138	0.0186515	0.846429	0.00208555	0.0259786	0.852587	1.53863e-09	4.5727e-08	PF00125:Core histone H2A/H2B/H3/H4	Histone
BnaA10g13680D	1.67217	0.00180254	0.0196915	1.99363	2.46769e-09	1.26251e-07	1.47583	6.66947e-08	1.49326e-06	PF00125:Core histone H2A/H2B/H3/H4	Histone
BnaA07g37600D	1.97963	0.00100388	0.0118363	2.32721	6.44551e-07	1.96221e-05	1.71642	5.18651e-08	1.18696e-06	PF00125:Core histone H2A/H2B/H3/H4	Histone
BnaC04g28830D	8.22995	5.76841e-33	4.78996e-30	7.74512	3.20766e-39	1.69537e-35	8.98535	4.50227e-39	2.53675e-36	PF00125:Core histone H2A/H2B/H3/H4	Histone
BnaC09g24400D	-2.38739	0.000108078	0.00161668	-2.19608	0.000780895	0.0111105	-2.36096	5.58007e-05	0.000680427	PF00125:Core histone H2A/H2B/H3/H4|PF16211:C-terminus of histone H2A	Histone
BnaA08g02000D	-2.10917	1.22404e-07	3.25316e-06	-1.49355	0.000377196	0.00589965	-2.01148	1.15929e-23	1.86405e-21	PF00125:Core histone H2A/H2B/H3/H4|PF16211:C-terminus of histone H2A	Histone
BnaA03g18750D	0.840267	0.00171378	0.018858	0.891056	0.000430715	0.00663552	0.82006	3.87789e-05	0.000491594	PF00132:Bacterial transferase hexapeptide (six repeats)|PF00483:Nucleotidyl transferase	Hexapep
BnaC01g08840D	-5.90815	6.65343e-05	0.00105089	-3.3142	0.0136501	0.12569	-6.18202	1.90984e-05	0.000259373	PF00132:Bacterial transferase hexapeptide (six repeats)|PF13720:Udp N-acetylglucosamine O-acyltransferase; Domain 2	Hexapep
BnaC07g37220D	6.78114	1.79684e-07	4.61344e-06	7.28514	8.3075e-08	3.10054e-06	7.24346	4.908e-08	1.12929e-06	PF00133:tRNA synthetases class I (I, L, M and V)	-
BnaC05g10820D	-1.48835	2.07608e-07	5.29051e-06	-1.86831	2.50415e-07	8.38501e-06	-1.50352	1.04136e-14	6.5798e-13	PF00133:tRNA synthetases class I (I, L, M and V)|PF08264:Anticodon-binding domain of tRNA	-
BnaA03g45240D	8.62165	1.95887e-10	8.30002e-09	4.08539	1.34819e-07	4.81218e-06	8.33284	9.48197e-11	3.41672e-09	PF00133:tRNA synthetases class I (I, L, M and V)|PF08264:Anticodon-binding domain of tRNA	-
BnaC01g11890D	2.68404	1.22949e-05	0.000224202	2.38769	0.00609948	0.0647474	3.5283	4.36166e-10	1.41668e-08	PF00134:Cyclin, N-terminal domain	-
BnaA09g09200D	-2.8111	0.000132047	0.00193318	-2.56232	0.010413	0.101142	-2.01622	0.000274876	0.00284499	PF00134:Cyclin, N-terminal domain|PF02984:Cyclin, C-terminal domain	Cyclin_C
BnaC08g21500D	1.06739	0.00035269	0.00468586	0.988098	0.000461527	0.00704075	1.08073	3.03425e-05	0.000393858	PF00134:Cyclin, N-terminal domain|PF02984:Cyclin, C-terminal domain	Cyclin_C
BnaA08g21740D	1.45466	0.0022965	0.0242172	1.91226	1.79471e-05	0.000393348	1.6981	6.64276e-07	1.23374e-05	PF00134:Cyclin, N-terminal domain|PF02984:Cyclin, C-terminal domain	Cyclin_C
BnaA08g04030D	1.68802	0.00403424	0.0394915	1.96157	0.000218703	0.00362186	2.46453	9.13572e-07	1.64641e-05	PF00134:Cyclin, N-terminal domain|PF02984:Cyclin, C-terminal domain	Cyclin_C
BnaC01g05990D	-9.4743	1.20951e-18	2.01694e-16	-6.13557	1.07164e-10	7.43906e-09	-6.01197	7.91569e-09	2.08443e-07	PF00137:ATP synthase subunit C	-
BnaCnng24240D	-7.08503	1.01765e-06	2.29295e-05	-3.95203	0.000241486	0.00396192	-6.49492	2.32827e-06	3.87813e-05	PF00139:Legume lectin domain	-
BnaCnng24320D	-3.92634	1.55166e-12	9.32518e-11	-3.0402	6.75572e-12	6.14002e-10	-4.14706	3.11251e-28	7.31718e-26	PF00139:Legume lectin domain	-
BnaA05g29190D	-1.8262	1.73084e-05	0.000306754	-1.80417	3.16838e-06	8.17804e-05	-2.13391	2.5923e-05	0.000342638	PF00139:Legume lectin domain	-
BnaA07g16270D	1.35141	0.000789274	0.00957124	1.69655	0.0388136	0.284346	1.74708	0.000191161	0.00206833	PF00139:Legume lectin domain	-
BnaC03g20910D	3.54926	5.76475e-11	2.6558e-09	2.41068	1.53124e-14	2.40758e-12	3.73769	3.05945e-24	5.11228e-22	PF00139:Legume lectin domain|PF00069:Protein kinase domain	Pkinase
BnaC01g01400D	-10.844	3.17812e-16	3.63699e-14	-6.18752	1.09456e-17	2.91501e-15	-6.16425	0.00206375	0.0166922	PF00141:Peroxidase	-
BnaC01g02300D	-10.5945	1.06624e-29	6.36852e-27	-4.60907	NA	1	-7.1105	0.000897781	0.00806155	PF00141:Peroxidase	-
BnaC01g04790D	-9.51846	2.69408e-32	2.10854e-29	-5.93353	5.38136e-07	1.66856e-05	-7.12174	0.000612396	0.00576348	PF00141:Peroxidase	-
BnaCnng52220D	-8.4707	2.44953e-11	1.21923e-09	-4.01208	0.000124573	0.00220603	-8.07048	3.10181e-14	1.85988e-12	PF00141:Peroxidase	-
BnaC06g25550D	-6.55143	0.000134988	0.00197199	-6.82854	0.000561628	0.00835961	-5.71336	0.00016198	0.00178576	PF00141:Peroxidase	-
BnaC01g02640D	-5.49956	1.09078e-21	2.80272e-19	-4.07613	5.58744e-13	6.31435e-11	-4.22455	3.03581e-16	2.35728e-14	PF00141:Peroxidase	-
BnaA02g05640D	-5.11517	0.0020831	0.0223054	-6.30624	0.00030794	0.00492729	-6.22445	1.05403e-05	0.000152084	PF00141:Peroxidase	-
BnaC02g15500D	-3.30482	1.01846e-08	3.2436e-07	-2.88954	2.54075e-07	8.48687e-06	-4.34026	2.08868e-17	1.83266e-15	PF00141:Peroxidase	-
BnaA04g09990D	-2.92313	1.04579e-06	2.35014e-05	-2.27342	0.00157929	0.0204626	-1.77602	2.2803e-06	3.80661e-05	PF00141:Peroxidase	-
BnaA08g28210D	-2.06156	0.000282929	0.00384682	-1.31254	0.0295375	0.232424	-2.16186	1.93568e-08	4.74019e-07	PF00141:Peroxidase	-
BnaA10g15310D	-1.98566	5.62227e-07	1.32328e-05	-1.38302	0.0411854	0.297942	-1.12137	0.242433	0.613544	PF00141:Peroxidase	-
BnaA09g07380D	-1.08649	0.000494123	0.00632669	-1.3397	0.00639376	0.0674106	-1.30961	2.32035e-09	6.69456e-08	PF00141:Peroxidase	-
BnaA01g03520D	1.27719	1.9661e-06	4.17572e-05	1.25455	0.0370747	0.274686	1.06855	0.00684278	0.0468152	PF00141:Peroxidase	-
BnaA01g06830D	1.55045	3.2549e-07	8.01264e-06	1.52449	0.00585481	0.0625734	1.48516	2.38979e-11	9.39597e-10	PF00141:Peroxidase	-
BnaA01g01600D	1.68333	0.00116193	0.0134461	1.63738	0.00338269	0.0392742	1.59402	1.08948e-10	3.89084e-09	PF00141:Peroxidase	-
BnaA03g17800D	1.9865	1.89505e-12	1.12597e-10	0.958732	0.162694	0.738113	0.967793	0.00804536	0.0536064	PF00141:Peroxidase	-
BnaA01g00410D	2.14378	0.000857727	0.010315	0.979006	0.0474327	0.331176	1.03074	0.000213764	0.00228498	PF00141:Peroxidase	-
BnaA03g18320D	2.63733	0.000829266	0.0100045	1.54928	0.176288	0.770127	1.6482	0.00133273	0.0114214	PF00141:Peroxidase	-
BnaC08g46330D	3.64108	0.00236525	0.0248193	4.64544	0.000639871	0.00937241	5.37108	0.000189151	0.00204888	PF00141:Peroxidase	-
BnaA04g25090D	5.32732	5.74073e-10	2.25851e-08	4.09675	2.44573e-13	3.06095e-11	5.62923	1.26919e-16	1.02888e-14	PF00141:Peroxidase	-
BnaAnng36480D	8.67358	6.41423e-12	3.51652e-10	9.59779	5.55711e-14	7.92008e-12	7.40978	1.72819e-09	5.08507e-08	PF00141:Peroxidase	-
BnaC07g21320D	-9.54413	1.76898e-14	1.47251e-12	-5.40516	5.73561e-07	1.76962e-05	-6.23458	7.77881e-06	0.000115995	PF00149:Calcineurin-like phosphoesterase	Metallophos
BnaCnng22530D	-4.14005	1.45638e-08	4.52606e-07	-3.45629	1.87369e-07	6.47918e-06	-4.78915	2.90723e-06	4.75193e-05	PF00149:Calcineurin-like phosphoesterase	Metallophos
BnaC05g47900D	-3.84705	8.98497e-18	1.30447e-15	-3.81075	9.34759e-19	3.00128e-16	-3.77455	6.32322e-35	2.71127e-32	PF00149:Calcineurin-like phosphoesterase	Metallophos
BnaC02g46770D	-1.13096	5.57849e-06	0.0001089	-1.25367	0.00173594	0.0221745	-1.30913	4.87122e-09	1.32787e-07	PF00149:Calcineurin-like phosphoesterase	Metallophos
BnaCnng61610D	-0.667045	0.00457364	0.0439257	-0.634952	0.0102832	0.100065	-0.618938	0.00187755	0.0153888	PF00149:Calcineurin-like phosphoesterase	Metallophos
BnaC03g30360D	1.05633	0.000165089	0.00236356	0.877619	0.026228	0.211865	0.662308	0.00056665	0.00539176	PF00149:Calcineurin-like phosphoesterase	Metallophos
BnaA05g32550D	1.60167	2.65882e-09	9.2985e-08	1.45229	5.24925e-05	0.00102146	1.5396	5.99982e-12	2.6087e-10	PF00149:Calcineurin-like phosphoesterase|PF02450:Lecithin:cholesterol acyltransferase	Metallophos
BnaA05g30450D	2.2644	9.12779e-05	0.00139292	2.71253	7.78577e-05	0.00145766	2.69298	2.53238e-06	4.18032e-05	PF00149:Calcineurin-like phosphoesterase|PF14008:Iron/zinc purple acid phosphatase-like protein C|PF16656:Purple acid Phosphatase, N-terminal domain	Metallophos
BnaC04g14080D	-1.37582	0.000232482	0.00322928	-1.07278	0.00991021	0.0970816	-1.00692	0.000598883	0.00566132	PF00149:Calcineurin-like phosphoesterase|PF16891:Serine-threonine protein phosphatase N-terminal domain	Metallophos
BnaA03g29080D	1.31286	0.00235856	0.0247643	0.801952	0.290306	0.953944	1.06495	0.00297371	0.0229108	PF00149:Calcineurin-like phosphoesterase|PF16891:Serine-threonine protein phosphatase N-terminal domain	Metallophos
BnaC05g44530D	-1.83403	1.72476e-05	0.000305835	-1.44165	0.00231835	0.0284758	-1.74564	3.67746e-06	5.89223e-05	PF00152:tRNA synthetases class II (D, K and N)	tRNA-synt_2
BnaA01g06010D	0.976027	0.000608413	0.00759857	0.987009	7.40792e-05	0.00139719	1.07553	2.42845e-10	8.20831e-09	PF00152:tRNA synthetases class II (D, K and N)	tRNA-synt_2
BnaA03g58160D	5.36016	0.000136751	0.00199304	2.8026	0.0129554	0.120574	4.3465	1.77754e-06	3.03799e-05	PF00152:tRNA synthetases class II (D, K and N)	tRNA-synt_2
BnaC01g06120D	-10.0847	1.49487e-19	2.75101e-17	-5.75862	5.22599e-08	2.0379e-06	-6.28561	1.88202e-05	0.000256404	PF00153:Mitochondrial carrier protein	Mito_carr
BnaC01g00080D	-4.97382	0.00476608	0.045452	-4.09576	0.145636	0.694177	-4.1157	0.045096	0.210417	PF00153:Mitochondrial carrier protein	Mito_carr
BnaCnng35730D	-2.66974	8.37648e-05	0.0012875	-2.6839	0.000100209	0.00182153	-2.70435	1.09493e-11	4.57962e-10	PF00153:Mitochondrial carrier protein	Mito_carr
BnaA10g03110D	-1.8325	1.19747e-06	2.66634e-05	-1.8651	2.55888e-09	1.30431e-07	-1.93995	3.87124e-10	1.26705e-08	PF00153:Mitochondrial carrier protein	Mito_carr
BnaC03g05910D	-1.59227	2.14276e-05	0.000373823	-1.65998	7.87116e-08	2.95534e-06	-1.89926	2.47217e-19	2.67104e-17	PF00153:Mitochondrial carrier protein	Mito_carr
BnaA03g04370D	1.07452	0.00109531	0.012775	1.04819	1.68807e-05	0.000371874	1.08131	5.56691e-08	1.26975e-06	PF00153:Mitochondrial carrier protein	Mito_carr
BnaC04g46770D	2.06935	5.30879e-10	2.10285e-08	2.55421	2.87778e-12	2.82879e-10	2.04565	2.22961e-16	1.75324e-14	PF00153:Mitochondrial carrier protein	Mito_carr
BnaC09g03200D	6.72869	1.36072e-16	1.65747e-14	8.01181	2.63465e-13	3.25685e-11	5.52303	1.07826e-21	1.46729e-19	PF00153:Mitochondrial carrier protein	Mito_carr
BnaC05g39620D	-8.25993	7.68698e-11	3.47092e-09	-6.27439	3.56912e-13	4.24281e-11	-6.28023	1.0817e-11	4.52708e-10	PF00155:Aminotransferase class I and II	Aminotran_1_2
BnaC07g38400D	-6.86404	5.59126e-06	0.000109087	-6.62027	3.16743e-06	8.17804e-05	-6.62807	1.11234e-06	1.9728e-05	PF00155:Aminotransferase class I and II	Aminotran_1_2
BnaC01g06460D	-5.41922	3.08853e-31	2.14593e-28	-4.38963	1.83413e-20	8.23678e-18	-4.77558	7.67333e-52	1.37668e-48	PF00155:Aminotransferase class I and II	Aminotran_1_2
BnaA08g11470D	1.2803	0.000501898	0.00640936	1.66404	5.66132e-08	2.1952e-06	1.4285	3.74331e-09	1.03742e-07	PF00155:Aminotransferase class I and II	Aminotran_1_2
BnaC09g07070D	5.2277	0.00210863	0.0225257	5.42536	0.00090403	0.0126355	5.46366	0.000917924	0.00822236	PF00155:Aminotransferase class I and II	Aminotran_1_2
BnaCnng56050D	7.83185	1.04164e-12	6.46546e-11	4.38896	1.86214e-12	1.89552e-10	5.82937	8.15928e-05	0.000959742	PF00155:Aminotransferase class I and II	Aminotran_1_2
BnaA01g04910D	9.75774	2.18138e-30	1.38503e-27	8.47624	8.63424e-33	1.97753e-29	7.73478	3.45056e-80	5.88113e-76	PF00155:Aminotransferase class I and II	Aminotran_1_2
BnaCnng53700D	2.73021	3.37133e-06	6.83613e-05	1.80532	0.000117627	0.00209545	1.13754	0.00833602	0.0552085	PF00156:Phosphoribosyl transferase domain	Pribosyltran
BnaC03g65030D	5.19989	0.00262589	0.0271649	6.42388	9.78958e-05	0.00178325	6.00648	0.000238079	0.00250754	PF00156:Phosphoribosyl transferase domain	Pribosyltran
BnaA07g16410D	-1.01253	0.00278834	0.0286452	-0.954159	0.0151969	0.137115	-0.642936	0.00311243	0.0238232	PF00156:Phosphoribosyl transferase domain|PF00215:Orotidine 5'-phosphate decarboxylase / HUMPS family	Pribosyltran
BnaC01g06080D	-5.40823	3.81934e-13	2.57233e-11	-5.09375	7.65365e-09	3.51996e-07	-5.18536	1.12481e-17	1.02657e-15	PF00160:Cyclophilin type peptidyl-prolyl cis-trans isomerase/CLD	Pro_isomerase
BnaC04g41460D	-1.89275	0.00145434	0.0163224	-2.17325	6.77386e-05	0.00128786	-1.52241	0.0133856	0.0816548	PF00160:Cyclophilin type peptidyl-prolyl cis-trans isomerase/CLD	Pro_isomerase
BnaC03g05790D	-1.45178	5.99361e-06	0.000116172	-1.36289	0.00298599	0.0353432	-1.16465	3.57074e-06	5.73877e-05	PF00160:Cyclophilin type peptidyl-prolyl cis-trans isomerase/CLD	Pro_isomerase
BnaCnng32180D	-1.22448	3.79858e-05	0.000628399	-1.0225	0.018214	0.158075	-1.36288	3.12929e-08	7.41029e-07	PF00160:Cyclophilin type peptidyl-prolyl cis-trans isomerase/CLD	Pro_isomerase
BnaA07g20290D	1.96309	0.000156258	0.00224943	2.06973	0.00188727	0.0238362	2.40826	1.15427e-08	2.95397e-07	PF00162:Phosphoglycerate kinase	-
BnaC06g19780D	5.17212	2.21023e-16	2.59031e-14	3.89212	2.61964e-11	2.1003e-09	3.72967	1.15e-10	4.08772e-09	PF00162:Phosphoglycerate kinase	-
BnaAnng00560D	1.53946	3.42994e-05	0.000572983	1.41016	1.02651e-06	3.0026e-05	1.11552	7.86425e-09	2.07169e-07	PF00164:Ribosomal protein S12/S23	Ribosomal_S12
BnaA03g30560D	1.86268	1.09064e-05	0.000201091	1.973	1.33835e-10	9.05672e-09	1.75421	2.14675e-14	1.31734e-12	PF00164:Ribosomal protein S12/S23	Ribosomal_S12
BnaA03g55080D	-0.811359	0.00493752	0.0467985	-0.966424	0.0464758	0.326152	-0.822609	0.000636969	0.00596511	PF00168:C2 domain	C2
BnaC06g10130D	0.924848	0.00138461	0.0156299	0.842167	0.0394055	0.287548	0.877904	1.38934e-05	0.000195218	PF00168:C2 domain	C2
BnaA09g10870D	1.25046	0.000439764	0.00571558	1.20811	0.0358336	0.267797	0.686132	0.00905365	0.0591341	PF00168:C2 domain	C2
BnaC04g30460D	1.63857	9.62745e-07	2.17933e-05	1.19585	0.000763843	0.0108887	1.36529	3.79566e-06	6.06452e-05	PF00168:C2 domain	C2
BnaA09g05080D	2.06039	5.86761e-09	1.93478e-07	2.48594	0.000340205	0.00538109	1.55461	1.04883e-05	0.000151397	PF00168:C2 domain	C2
BnaC03g14160D	2.13879	1.97936e-08	6.03298e-07	1.84081	0.00168539	0.0216253	2.43149	2.712e-11	1.05956e-09	PF00168:C2 domain	C2
BnaA04g08270D	2.36197	0.00307856	0.0312124	2.06476	0.000286873	0.00462376	3.11724	5.50442e-06	8.49988e-05	PF00168:C2 domain	C2
BnaA09g51880D	3.9056	0.000121126	0.00178809	2.36113	0.184792	0.7881	4.38626	1.49195e-06	2.59081e-05	PF00168:C2 domain	C2
BnaA04g00370D	6.88865	4.56701e-07	1.09151e-05	4.01708	4.25941e-06	0.000106223	4.83537	2.13354e-06	3.58708e-05	PF00168:C2 domain	C2
BnaA06g37790D	8.45191	3.53121e-11	1.69326e-09	6.23547	1.95015e-11	1.60473e-09	5.55928	3.30691e-09	9.23226e-08	PF00168:C2 domain	C2
BnaC05g44090D	-3.78177	5.2394e-06	0.000102841	-6.54139	1.98923e-07	6.84428e-06	-5.56362	4.28436e-09	1.17541e-07	PF00168:C2 domain|PF01412:Putative GTPase activating protein for Arf	C2
BnaC01g04230D	-11.7132	4.3751e-18	6.70957e-16	-5.74245	2.93678e-13	3.57777e-11	-6.24503	0.00554148	0.0391539	PF00168:C2 domain|PF01585:G-patch domain	C2
BnaA02g36480D	6.48973	1.20986e-06	2.68954e-05	4.29089	0.000288114	0.00464267	6.33935	6.57231e-06	9.94394e-05	PF00168:C2 domain|PF08372:Plant phosphoribosyltransferase C-terminal	C2
BnaC04g41530D	1.40736	5.46277e-05	0.000875419	1.4905	2.90503e-07	9.59638e-06	2.02754	1.49252e-22	2.1696e-20	PF00169:PH domain	PH
BnaC01g01320D	-10.6899	1.56747e-15	1.61224e-13	-6.99397	1.91784e-15	3.52339e-13	-6.84134	5.48559e-17	4.62854e-15	PF00170:bZIP transcription factor	bZIP_1
BnaC01g02720D	-7.68066	4.04825e-07	9.76095e-06	-6.39272	3.58805e-05	0.000728704	-5.64701	0.000202575	0.00217767	PF00170:bZIP transcription factor	bZIP_1
BnaC01g03810D	-6.75651	7.41742e-40	1.14786e-36	-5.7459	1.55021e-39	8.87625e-36	-5.40523	1.02224e-33	3.82923e-31	PF00170:bZIP transcription factor	bZIP_1
BnaA03g34610D	-4.31221	0.000311775	0.00419795	-6.59725	1.83128e-05	0.000400342	-6.16202	2.41487e-05	0.000321116	PF00170:bZIP transcription factor	bZIP_1
BnaC01g04330D	-2.98177	2.9652e-06	6.08653e-05	-2.39324	4.61376e-06	0.000114156	-2.19252	6.22346e-06	9.48984e-05	PF00170:bZIP transcription factor	bZIP_1
BnaA05g01800D	1.02033	0.00279193	0.0286735	0.913794	0.114671	0.601148	1.08453	3.89559e-05	0.000493562	PF00170:bZIP transcription factor	bZIP_1
BnaA07g19330D	1.30333	0.00102687	0.0120657	1.49959	0.00622922	0.0658679	1.29173	1.93547e-07	3.95542e-06	PF00170:bZIP transcription factor	bZIP_1
BnaA04g23410D	1.4169	0.00331137	0.0332705	1.00241	0.0116526	0.110939	1.3011	0.000472833	0.00459459	PF00170:bZIP transcription factor	bZIP_1
BnaA01g01100D	2.86844	1.8993e-09	6.82094e-08	2.95864	1.16002e-05	0.000265507	2.72145	6.03222e-16	4.52921e-14	PF00170:bZIP transcription factor|PF07777:G-box binding protein MFMR	MFMR
BnaC02g43620D	-2.77665	3.91046e-06	7.82449e-05	-1.97979	0.0020885	0.0260059	-2.48229	1.36761e-13	7.489e-12	PF00170:bZIP transcription factor|PF14144:Seed dormancy control	bZIP_1
BnaC01g02370D	-8.24024	1.16015e-09	4.3309e-08	-4.45686	3.88304e-07	1.24384e-05	-4.49159	4.62772e-11	1.74599e-09	PF00171:Aldehyde dehydrogenase family	Aldedh
BnaC05g45180D	-4.82287	2.73676e-34	2.74042e-31	-4.40212	1.23696e-22	8.01807e-20	-3.79339	1.02601e-17	9.41446e-16	PF00171:Aldehyde dehydrogenase family	Aldedh
BnaA02g33470D	3.01992	0.00183375	0.0199843	1.68302	0.10333	0.562618	2.95762	0.000796126	0.00726887	PF00171:Aldehyde dehydrogenase family	Aldedh
BnaA06g19120D	-5.37891	0.000121145	0.00178809	-5.34882	0.00176524	0.0224902	-6.1548	1.5167e-05	0.000211068	PF00173:Cytochrome b5-like Heme/Steroid binding domain	-
BnaC04g37460D	-1.01554	9.12335e-05	0.00139255	-0.943238	0.0214877	0.180757	-0.892811	1.38907e-05	0.000195218	PF00173:Cytochrome b5-like Heme/Steroid binding domain	-
BnaA10g06850D	1.89182	2.79434e-11	1.37379e-09	1.5815	5.8757e-07	1.80393e-05	1.56003	3.99694e-09	1.10188e-07	PF00173:Cytochrome b5-like Heme/Steroid binding domain	-
BnaA03g27830D	-1.07273	0.00233987	0.0246213	-0.938597	0.0115385	0.109991	-0.776715	0.003422	0.0258532	PF00175:Oxidoreductase NAD-binding domain|PF00258:Flavodoxin|PF00667:FAD binding domain	NAD_binding_1
BnaC03g41330D	1.4137	7.55725e-05	0.00117431	1.60945	2.29558e-06	6.13017e-05	1.53917	1.76756e-08	4.36772e-07	PF00176:SNF2 family N-terminal domain|PF00097:Zinc finger, C3HC4 type (RING finger)|PF00271:Helicase conserved C-terminal domain	SNF2_N
BnaA05g30940D	0.708805	0.00259729	0.0269345	0.63384	0.0028232	0.0337126	0.664559	2.87499e-05	0.000375921	PF00176:SNF2 family N-terminal domain|PF09110:HAND|PF09111:SLIDE|PF00271:Helicase conserved C-terminal domain	SNF2_N
BnaA04g29230D	-3.18922	3.71993e-05	0.000616587	-1.79696	0.000432014	0.00665255	-3.5629	1.41669e-07	2.97548e-06	PF00177:Ribosomal protein S7p/S5e	-
BnaA05g27160D	-1.21767	0.00351024	0.0350206	-1.09693	0.00602422	0.0640947	-1.58964	9.89285e-09	2.5668e-07	PF00177:Ribosomal protein S7p/S5e	-
BnaA04g21290D	3.26006	1.84271e-15	1.86714e-13	3.54812	1.7899e-35	6.83245e-32	1.02721	NA	1	PF00177:Ribosomal protein S7p/S5e	-
BnaC05g43870D	-9.5722	9.03727e-19	1.54612e-16	-5.8203	4.37871e-12	4.15483e-10	-6.58342	8.24208e-09	2.16536e-07	PF00179:Ubiquitin-conjugating enzyme	UQ_con
BnaA08g24020D	-7.93866	2.15591e-10	9.07281e-09	-6.40167	9.28876e-11	6.57292e-09	-8.72226	3.20156e-12	1.45513e-10	PF00179:Ubiquitin-conjugating enzyme	UQ_con
BnaAnng21880D	-7.18685	1.60626e-08	4.95567e-07	-6.40205	2.86365e-08	1.1733e-06	-5.76131	1.57684e-11	6.42192e-10	PF00179:Ubiquitin-conjugating enzyme	UQ_con
BnaA08g23450D	-4.84975	6.79026e-30	4.12818e-27	-3.79424	6.18625e-10	3.64875e-08	-4.07777	3.28133e-26	6.57964e-24	PF00179:Ubiquitin-conjugating enzyme	UQ_con
BnaC07g29090D	-2.81538	1.38033e-10	5.99413e-09	-2.63838	1.11119e-10	7.65026e-09	-2.83664	6.06512e-26	1.18142e-23	PF00179:Ubiquitin-conjugating enzyme	UQ_con
BnaA07g15340D	-2.74173	5.78912e-06	0.000112625	-2.53394	7.3134e-05	0.00138202	-2.45608	4.13604e-12	1.84421e-10	PF00179:Ubiquitin-conjugating enzyme	UQ_con
BnaC05g12900D	-2.52492	8.84119e-17	1.09855e-14	-2.34224	1.08527e-06	3.15303e-05	-2.41322	1.00729e-29	2.68255e-27	PF00179:Ubiquitin-conjugating enzyme	UQ_con
BnaA06g34030D	-1.94805	8.60237e-09	2.77867e-07	-1.88358	2.26815e-11	1.84213e-09	-1.67252	9.95374e-18	9.17035e-16	PF00179:Ubiquitin-conjugating enzyme	UQ_con
BnaA07g37890D	-1.93516	1.28743e-05	0.000234142	-2.07117	0.000176326	0.00299145	-1.40637	1.2058e-05	0.000171657	PF00179:Ubiquitin-conjugating enzyme	UQ_con
BnaA03g21240D	-1.89564	2.28894e-06	4.79705e-05	-1.63123	1.23684e-06	3.54246e-05	-1.67219	5.55845e-11	2.06762e-09	PF00179:Ubiquitin-conjugating enzyme	UQ_con
BnaA06g27860D	0.769553	0.00160999	0.0178602	0.642379	0.0110976	0.106497	0.615019	0.00735632	0.0497248	PF00179:Ubiquitin-conjugating enzyme	UQ_con
BnaA05g29530D	1.22687	9.40372e-06	0.00017562	1.24983	2.03237e-05	0.000440657	0.98705	5.38645e-06	8.3347e-05	PF00179:Ubiquitin-conjugating enzyme	UQ_con
BnaA02g33480D	1.24541	0.00218345	0.0231969	1.12871	0.115641	0.604402	0.913755	0.00960399	0.0620863	PF00179:Ubiquitin-conjugating enzyme	UQ_con
BnaA10g03140D	2.41918	0.000978453	0.0115811	1.52518	0.0164695	0.146263	2.34395	0.00348923	0.0262824	PF00179:Ubiquitin-conjugating enzyme	UQ_con
BnaA09g04490D	3.37899	7.80866e-05	0.00120951	3.153	1.55014e-10	1.03509e-08	3.24494	6.13226e-12	2.6595e-10	PF00179:Ubiquitin-conjugating enzyme	UQ_con
BnaC01g03290D	-7.58788	9.76497e-09	3.1187e-07	-2.18128	0.0779674	0.469978	-6.26151	2.70727e-08	6.46709e-07	PF00180:Isocitrate/isopropylmalate dehydrogenase	-
BnaC05g43210D	-6.89504	8.43544e-07	1.9255e-05	-5.6659	7.38916e-06	0.000175678	-7.87722	6.03472e-10	1.91004e-08	PF00180:Isocitrate/isopropylmalate dehydrogenase	-
BnaC06g40420D	1.08536	0.000403043	0.00528473	0.821285	0.0116496	0.110926	1.08039	3.0637e-05	0.000397319	PF00180:Isocitrate/isopropylmalate dehydrogenase	-
BnaA07g25510D	1.25036	1.19309e-06	2.65746e-05	1.04816	0.00244666	0.029812	1.12887	1.61408e-11	6.56571e-10	PF00180:Isocitrate/isopropylmalate dehydrogenase	-
BnaA05g28730D	2.2307	8.02306e-05	0.00123709	3.00223	1.7418e-05	0.000382972	2.62436	9.84231e-08	2.12816e-06	PF00180:Isocitrate/isopropylmalate dehydrogenase	-
BnaA05g28740D	2.48003	8.36856e-06	0.000157868	2.07996	4.44974e-05	0.000882625	2.20938	1.20927e-09	3.64956e-08	PF00180:Isocitrate/isopropylmalate dehydrogenase	-
BnaA03g32270D	6.66326	2.39119e-05	0.00041199	2.54596	0.0329612	0.252454	5.6108	8.99649e-05	0.00105115	PF00182:Chitinase class I	-
BnaA03g20340D	-2.67803	0.00041956	0.0054777	-2.83986	0.00110961	0.0150857	-2.47167	7.95936e-07	1.45362e-05	PF00187:Chitin recognition protein|PF00182:Chitinase class I	-
BnaC01g04530D	-12.2078	1.56247e-23	5.18977e-21	-6.31543	4.59762e-12	4.34529e-10	-5.69387	0.0455471	0.211888	PF00188:Cysteine-rich secretory protein family	SCP
BnaC03g12850D	-2.6116	0.000358463	0.00475328	-1.34814	0.129846	0.64795	-1.07718	0.0285044	0.148693	PF00188:Cysteine-rich secretory protein family	SCP
BnaA01g31980D	-2.30353	2.37219e-05	0.000409234	-1.34227	0.0342694	0.259695	-1.19559	0.0316281	0.16088	PF00190:Cupin	-
BnaC01g38860D	3.2839	0.000645052	0.00800479	3.84421	7.975e-06	0.000188627	4.20424	7.65197e-08	1.69048e-06	PF00190:Cupin	-
BnaA06g29170D	4.94723	1.03814e-12	6.44961e-11	3.91446	1.27575e-08	5.64436e-07	3.90073	2.41566e-15	1.6669e-13	PF00190:Cupin	-
BnaA04g22180D	1.768	0.00531371	0.0497821	1.5717	0.0340758	0.258599	1.55256	0.00698682	0.0476	PF00191:Annexin	-
BnaA03g18080D	1.8429	7.24191e-05	0.00113254	1.41402	0.084143	0.493963	1.27321	1.15421e-06	2.04282e-05	PF00191:Annexin	-
BnaC03g21590D	2.22942	3.62399e-13	2.45289e-11	1.5419	0.0495836	0.34086	1.16979	0.00127769	0.0110048	PF00191:Annexin	-
BnaA03g18070D	2.3486	0.0004171	0.00545059	1.73493	0.0500038	0.342819	1.83638	7.29349e-05	0.000866576	PF00191:Annexin	-
BnaC06g34170D	-6.9889	0.000466473	0.00601793	-5.9686	NA	1	-5.10192	0.0363915	0.179252	PF00197:Trypsin and protease inhibitor	-
BnaA08g22890D	-5.72836	1.63104e-14	1.37619e-12	-3.20531	0.00958482	0.0944191	-5.12091	1.94002e-06	3.28848e-05	PF00197:Trypsin and protease inhibitor	-
BnaC06g23700D	2.38842	2.39887e-06	5.01047e-05	3.34097	1.16951e-06	3.37209e-05	1.94841	0.000409799	0.00404437	PF00197:Trypsin and protease inhibitor	-
BnaC02g46470D	3.71994	2.23e-26	9.61033e-24	4.73233	7.50214e-14	1.03926e-11	2.61661	8.4188e-09	2.20754e-07	PF00197:Trypsin and protease inhibitor	-
BnaAnng30440D	8.7362	3.46216e-12	1.9777e-10	7.40398	5.01821e-10	3.02723e-08	3.90724	0.0330486	0.166343	PF00197:Trypsin and protease inhibitor	-
BnaC06g31860D	8.98976	1.40073e-19	2.59882e-17	6.41084	1.09806e-33	3.01791e-30	4.87148	0.000189812	0.00205537	PF00197:Trypsin and protease inhibitor	-
BnaA06g02440D	-6.91784	2.99365e-05	0.000505933	-5.33909	2.53066e-05	0.000534855	-6.30505	1.15469e-05	0.000165243	PF00201:UDP-glucoronosyl and UDP-glucosyl transferase	UDPGT
BnaA04g19910D	-6.09955	7.1525e-08	1.9846e-06	-5.58302	4.65863e-08	1.83751e-06	-6.56886	3.15321e-09	8.85757e-08	PF00201:UDP-glucoronosyl and UDP-glucosyl transferase	UDPGT
BnaA03g12040D	-5.84632	0.000274168	0.00373966	-6.67692	1.75852e-05	0.000386279	-5.71481	0.000161913	0.00178531	PF00201:UDP-glucoronosyl and UDP-glucosyl transferase	UDPGT
BnaAnng24330D	-5.41843	0.000559164	0.00705075	-6.13932	5.60759e-05	0.00108534	-4.78522	0.00662625	0.0455486	PF00201:UDP-glucoronosyl and UDP-glucosyl transferase	UDPGT
BnaC01g04250D	-5.39823	1.12466e-07	3.01374e-06	-3.59345	3.89923e-05	0.000784069	-5.88083	2.88539e-20	3.42707e-18	PF00201:UDP-glucoronosyl and UDP-glucosyl transferase	UDPGT
BnaC03g71890D	-5.35109	1.74937e-05	0.000309877	-3.01139	0.00180239	0.0228913	-6.89159	2.79059e-07	5.58576e-06	PF00201:UDP-glucoronosyl and UDP-glucosyl transferase	UDPGT
BnaC05g17420D	-4.48209	5.44161e-22	1.44173e-19	-2.85064	1.664e-06	4.61579e-05	-4.76628	9.9013e-32	3.12514e-29	PF00201:UDP-glucoronosyl and UDP-glucosyl transferase	UDPGT
BnaA08g05710D	-4.38072	1.0794e-09	4.06738e-08	-4.00489	0.000161178	0.00276655	-3.87616	5.04725e-11	1.89067e-09	PF00201:UDP-glucoronosyl and UDP-glucosyl transferase	UDPGT
BnaA08g11370D	0.978221	0.00329367	0.0331172	1.19152	0.081389	0.483502	0.688909	0.144082	0.460847	PF00201:UDP-glucoronosyl and UDP-glucosyl transferase	UDPGT
BnaA01g03010D	1.45723	1.43527e-07	3.76606e-06	1.98109	0.0169574	0.149607	1.26212	0.00136999	0.0116999	PF00201:UDP-glucoronosyl and UDP-glucosyl transferase	UDPGT
BnaC05g36720D	2.1505	7.63664e-08	2.11205e-06	2.51026	2.12992e-07	7.25568e-06	2.42542	1.01634e-23	1.64194e-21	PF00201:UDP-glucoronosyl and UDP-glucosyl transferase	UDPGT
BnaC04g44320D	4.16229	0.00122475	0.0140869	4.64559	0.000337785	0.00534775	6.38493	5.41288e-06	8.37178e-05	PF00201:UDP-glucoronosyl and UDP-glucosyl transferase	UDPGT
BnaA08g05720D	6.003	0.00496035	0.0469888	3.41932	0.0453742	0.320465	0.817205	0.441632	0.800785	PF00201:UDP-glucoronosyl and UDP-glucosyl transferase	UDPGT
BnaC05g44970D	-1.84765	0.000180838	0.00256049	-1.76847	5.49632e-09	2.61713e-07	-1.85219	7.30518e-13	3.64329e-11	PF00201:UDP-glucoronosyl and UDP-glucosyl transferase|PF03033:Glycosyltransferase family 28 N-terminal domain	UDPGT
BnaA03g31030D	-7.96052	7.74731e-09	2.51321e-07	-2.49911	0.00276152	0.0330737	-8.00603	2.86481e-10	9.58819e-09	PF00202:Aminotransferase class-III	Aminotran_3
BnaC01g00550D	-5.77354	1.45029e-26	6.41243e-24	-4.53728	1.50912e-06	4.23405e-05	-5.27943	7.58944e-44	6.08727e-41	PF00202:Aminotransferase class-III	Aminotran_3
BnaC03g76360D	-2.37169	0.0042415	0.0411642	-1.71185	0.077234	0.467102	-2.09665	2.83518e-07	5.66173e-06	PF00202:Aminotransferase class-III	Aminotran_3
BnaAnng13920D	-5.81007	8.52858e-11	3.82808e-09	-5.12613	4.15713e-06	0.000104019	-7.979	1.96524e-67	1.21802e-63	PF00205:Thiamine pyrophosphate enzyme, central domain|PF02775:Thiamine pyrophosphate enzyme, C-terminal TPP binding domain|PF02776:Thiamine pyrophosphate enzyme, N-terminal TPP binding domain	TPP_enzyme_N
BnaC03g05880D	-3.72738	2.03297e-32	1.60961e-29	-3.51339	6.69904e-17	1.56562e-14	-3.87219	5.75157e-60	2.17844e-56	PF00213:ATP synthase delta (OSCP) subunit	-
BnaA03g04340D	1.12122	0.00213187	0.0227276	0.966142	0.0023447	0.0287482	0.986277	5.51618e-06	8.51226e-05	PF00213:ATP synthase delta (OSCP) subunit	-
BnaA10g06350D	2.63325	0.000568892	0.00715654	3.16213	0.000492359	0.00744498	3.4381	1.50444e-07	3.14333e-06	PF00224:Pyruvate kinase, barrel domain	PK
BnaA06g28980D	-2.63772	5.5968e-10	2.20795e-08	-2.31378	7.35402e-09	3.3958e-07	-2.11963	2.54286e-07	5.11845e-06	PF00225:Kinesin motor domain	Kinesin
BnaA10g28890D	-2.35007	0.000730476	0.00893619	-1.50468	0.0289308	0.228776	-1.64218	1.06735e-09	3.23989e-08	PF00225:Kinesin motor domain	Kinesin
BnaA09g03790D	-2.17888	0.000279876	0.00380989	-2.2028	3.08554e-05	0.000638192	-1.57668	4.0591e-06	6.43565e-05	PF00225:Kinesin motor domain	Kinesin
BnaA03g02940D	-1.89479	4.16365e-05	0.000682985	-1.4119	0.00156201	0.0202808	-1.39443	7.45645e-10	2.32549e-08	PF00225:Kinesin motor domain	Kinesin
BnaA04g21400D	-1.36342	0.000530087	0.00673524	-1.54857	0.000176073	0.00298789	-1.49954	1.97768e-08	4.83609e-07	PF00225:Kinesin motor domain	Kinesin
BnaC01g44240D	-1.25339	3.03954e-05	0.000513069	-0.969278	0.00584067	0.0624513	-0.8594	9.2794e-06	0.000135579	PF00225:Kinesin motor domain	Kinesin
BnaA01g27720D	0.992554	8.24987e-06	0.000155694	0.943668	0.00377384	0.0432672	0.77045	0.000156654	0.00173265	PF00225:Kinesin motor domain	Kinesin
BnaC09g03220D	2.21656	3.71587e-05	0.000616176	1.95092	1.26366e-05	0.000286839	2.78601	1.94756e-20	2.35003e-18	PF00225:Kinesin motor domain	Kinesin
BnaA06g12540D	3.46696	0.000627758	0.00781296	6.38851	4.01301e-06	0.000100743	4.70096	1.89403e-06	3.21692e-05	PF00225:Kinesin motor domain	Kinesin
BnaCnng54500D	3.71535	0.000332965	0.0044507	6.85245	2.56114e-06	6.75012e-05	7.13874	6.57782e-08	1.47613e-06	PF00225:Kinesin motor domain	Kinesin
BnaC01g35690D	6.61403	3.38117e-06	6.85199e-05	6.87733	1.2977e-06	3.69978e-05	6.8299	6.40003e-07	1.19198e-05	PF00225:Kinesin motor domain	Kinesin
BnaC04g45150D	9.1701	8.46527e-13	5.34206e-11	9.5797	3.95168e-14	5.75254e-12	9.86935	7.24646e-16	5.33515e-14	PF00225:Kinesin motor domain	Kinesin
BnaA05g00450D	-2.16465	5.27464e-05	0.000848265	-1.94216	0.00412719	0.0466951	-1.40252	9.05597e-12	3.83002e-10	PF00225:Kinesin motor domain|PF00307:Calponin homology (CH) domain	Kinesin
BnaC01g00060D	-5.23504	7.21596e-07	1.66839e-05	-3.91528	7.75697e-08	2.92045e-06	-2.88824	8.55727e-09	2.24068e-07	PF00225:Kinesin motor domain|PF11995:Domain of unknown function (DUF3490)	Kinesin
BnaC08g22570D	1.78248	2.29143e-07	5.78516e-06	1.32375	0.00482203	0.0531219	1.32541	0.000146191	0.00163042	PF00225:Kinesin motor domain|PF11995:Domain of unknown function (DUF3490)	Kinesin
BnaC01g02600D	-5.36351	8.76333e-19	1.50683e-16	-3.025	0.000526686	0.00790317	-4.29902	3.72691e-32	1.2042e-29	PF00226:DnaJ domain	DnaJ
BnaA03g23590D	-1.2348	0.000114383	0.00169897	-1.02354	0.0119596	0.113141	-1.49	1.90146e-07	3.89058e-06	PF00226:DnaJ domain	DnaJ
BnaA03g01870D	-0.993433	0.000739511	0.00903536	-1.1243	0.00938485	0.0927284	-0.980701	0.000153957	0.00170697	PF00226:DnaJ domain	DnaJ
BnaC02g45150D	7.01304	2.73425e-07	6.78738e-06	7.01558	4.77704e-07	1.49945e-05	4.19106	0.000190666	0.00206331	PF00226:DnaJ domain	DnaJ
BnaCnng23000D	8.34758	7.13465e-11	3.23439e-09	8.85053	3.82788e-12	3.68366e-10	8.60965	6.02879e-12	2.61962e-10	PF00226:DnaJ domain	DnaJ
BnaA07g20150D	9.96331	1.42171e-14	1.22075e-12	7.40706	2.78585e-13	3.41814e-11	4.74055	0.0178036	0.102837	PF00226:DnaJ domain	DnaJ
BnaA01g11090D	1.43251	0.00317734	0.0320705	1.7948	1.26102e-07	4.52215e-06	1.72939	2.14463e-10	7.32159e-09	PF00226:DnaJ domain|PF02889:Sec63 Brl domain	Sec63
BnaC05g45480D	-2.88741	6.83359e-07	1.58604e-05	-3.21014	5.46676e-07	1.69123e-05	-2.59776	6.7317e-07	1.24827e-05	PF00226:DnaJ domain|PF11926:Domain of unknown function (DUF3444)	DnaJ
BnaA01g05380D	1.59193	4.63149e-09	1.55581e-07	1.52854	3.02048e-06	7.8316e-05	1.70342	2.72272e-17	2.35265e-15	PF00226:DnaJ domain|PF14308:X-domain of DnaJ-containing	DnaJ
BnaC01g07210D	-4.13505	3.61753e-33	3.11799e-30	-3.65287	4.15524e-19	1.44927e-16	-3.76469	4.07829e-26	8.10617e-24	PF00227:Proteasome subunit	Proteasome
BnaA06g07650D	-3.05517	2.63778e-15	2.57689e-13	-2.98129	7.07261e-15	1.19108e-12	-2.85854	4.20992e-27	9.08277e-25	PF00227:Proteasome subunit	Proteasome
BnaA01g05950D	1.27975	3.10879e-05	0.000523297	1.18115	0.00140571	0.0185067	1.36817	3.92086e-13	2.02814e-11	PF00227:Proteasome subunit	Proteasome
BnaC05g47470D	-9.77239	3.05716e-15	2.95689e-13	-5.62864	3.47896e-10	2.17111e-08	-7.16092	4.16837e-20	4.89126e-18	PF00230:Major intrinsic protein	-
BnaA07g16510D	-1.68125	0.00514732	0.0484431	-1.43933	3.5602e-06	9.07349e-05	-1.75528	1.59616e-12	7.59917e-11	PF00230:Major intrinsic protein	-
BnaA05g37440D	0.974093	0.00128757	0.0147049	1.15392	4.74348e-05	0.000934953	0.764415	0.000181102	0.00197013	PF00230:Major intrinsic protein	-
BnaC02g36210D	1.08009	0.00213918	0.0227948	1.07908	0.0824217	0.487355	1.19137	8.0423e-05	0.000947455	PF00230:Major intrinsic protein	-
BnaA10g00360D	3.9217	4.75176e-12	2.66298e-10	3.68876	1.37567e-08	6.05138e-07	4.13401	9.50393e-66	5.3995e-62	PF00230:Major intrinsic protein	-
BnaC05g43620D	-9.29043	6.28054e-13	4.08842e-11	-6.86252	2.21107e-24	1.94773e-21	-7.07736	0.000270097	0.00280062	PF00232:Glycosyl hydrolase family 1	Glyco_hydro_1
BnaAnng19210D	-7.66146	3.58228e-17	4.72715e-15	-6.03085	6.69012e-17	1.56562e-14	-6.16131	0.000128028	0.00144439	PF00232:Glycosyl hydrolase family 1	Glyco_hydro_1
BnaC05g45310D	-5.93711	1.93392e-37	2.35147e-34	-4.69411	1.61081e-09	8.55324e-08	-4.74786	1.36376e-42	9.89104e-40	PF00232:Glycosyl hydrolase family 1	Glyco_hydro_1
BnaC05g43610D	-4.38522	6.55745e-12	3.58926e-10	-4.00982	1.58134e-27	2.01211e-24	-3.97196	1.80423e-30	5.04119e-28	PF00232:Glycosyl hydrolase family 1	Glyco_hydro_1
BnaA08g05540D	-1.15757	0.000108335	0.00161982	-0.684147	0.0397973	0.289934	-0.784074	0.0113923	0.0713204	PF00232:Glycosyl hydrolase family 1	Glyco_hydro_1
BnaA04g07780D	-0.864111	0.000336812	0.00449684	-0.849167	0.0117473	0.11164	-0.726632	1.4311e-05	0.000200301	PF00232:Glycosyl hydrolase family 1	Glyco_hydro_1
BnaA07g24400D	3.21705	5.50231e-05	0.000881547	5.50485	1.9578e-05	0.000425967	2.28165	0.00762875	0.0512664	PF00232:Glycosyl hydrolase family 1	Glyco_hydro_1
BnaC06g25540D	5.14603	0.000801349	0.00970728	3.95296	0.167997	0.750087	--	--	--	PF00232:Glycosyl hydrolase family 1	Glyco_hydro_1
BnaC07g32320D	2.21334	0.00262679	0.0271701	2.46324	1.01987e-05	0.000236023	2.23302	7.11326e-08	1.58326e-06	PF00234:Protease inhibitor/seed storage/LTP family	-
BnaC02g10060D	2.36015	0.000536711	0.00681125	1.44775	0.00859184	0.0863836	2.58341	7.2837e-05	0.000865865	PF00234:Protease inhibitor/seed storage/LTP family	-
BnaA02g07120D	2.48421	3.25493e-05	0.00054589	1.80013	0.0181241	0.157434	2.75559	0.000210485	0.00225381	PF00234:Protease inhibitor/seed storage/LTP family	-
BnaC02g10050D	4.19422	1.1267e-13	8.26738e-12	2.49747	0.000485414	0.00734967	5.21977	0.000124921	0.00141261	PF00234:Protease inhibitor/seed storage/LTP family	-
BnaC01g11730D	-1.6901	0.000820548	0.00991164	-1.79142	3.60512e-05	0.000731565	-1.55884	6.89019e-05	0.000824239	PF00235:Profilin	-
BnaAnng19920D	-1.33802	7.55789e-07	1.74319e-05	-1.3285	0.000295645	0.00475065	-1.18161	2.48203e-06	4.11014e-05	PF00235:Profilin	-
BnaA09g09990D	2.69653	1.77683e-13	1.25634e-11	2.76885	7.20627e-14	1.00231e-11	2.6672	4.62679e-37	2.31938e-34	PF00235:Profilin	-
BnaC01g16390D	7.85787	1.87311e-09	6.734e-08	7.81501	1.0113e-08	4.54456e-07	7.51832	2.04278e-08	4.97387e-07	PF00235:Profilin	-
BnaA06g21910D	-7.53806	2.3195e-09	8.17058e-08	-6.04057	6.90591e-10	4.01783e-08	-6.66041	1.50708e-09	4.48675e-08	PF00237:Ribosomal protein L22p/L17e	-
BnaA04g15320D	-5.52905	5.83252e-05	0.00092964	-3.9767	0.000724175	0.0104185	-3.01363	0.00117801	0.0102412	PF00238:Ribosomal protein L14p/L23e	-
BnaA09g17870D	-2.86503	0.00525444	0.0493082	-4.77915	0.00113584	0.0153963	-4.5124	8.8739e-06	0.000130223	PF00238:Ribosomal protein L14p/L23e	-
BnaA05g33020D	1.15487	0.00125024	0.0143314	1.04707	5.96525e-05	0.00114842	1.17882	2.33116e-07	4.71601e-06	PF00238:Ribosomal protein L14p/L23e	-
BnaC06g21170D	5.68426	7.44892e-13	4.73663e-11	4.66987	1.08639e-10	7.50962e-09	4.21773	5.73959e-11	2.12896e-09	PF00240:Ubiquitin family	ubiquitin
BnaA02g08050D	5.98627	0.0001162	0.00172304	7.06174	1.68432e-05	0.000371404	5.8105	2.93073e-05	0.00038233	PF00240:Ubiquitin family	ubiquitin
BnaA06g21560D	8.69328	2.0938e-10	8.82235e-09	4.87749	1.38876e-09	7.48403e-08	4.53336	0.00599096	0.041874	PF00240:Ubiquitin family|PF00225:Kinesin motor domain	ubiquitin
BnaC07g34040D	5.77833	0.000149834	0.00216564	6.88309	1.89494e-06	5.16671e-05	6.70361	5.0823e-06	7.90564e-05	PF00240:Ubiquitin family|PF01805:Surp module	ubiquitin
BnaA08g00640D	-4.09194	0.0013712	0.0155075	-1.7268	0.273984	0.934678	-2.50577	0.0145518	0.0873079	PF00244:14-3-3 protein	-
BnaA09g52470D	-1.13788	6.33523e-07	1.48085e-05	-1.00066	0.0150386	0.135907	-1.13948	1.62429e-09	4.80423e-08	PF00244:14-3-3 protein	-
BnaA03g02930D	-0.965578	0.000563662	0.00709809	-0.8435	0.0288699	0.228452	-0.902266	3.95804e-06	6.29152e-05	PF00244:14-3-3 protein	-
BnaA05g33430D	1.3139	1.22894e-08	3.87228e-07	1.1508	1.68712e-06	4.6724e-05	1.3775	2.74868e-11	1.07144e-09	PF00244:14-3-3 protein	-
BnaC09g06980D	2.55212	8.50799e-21	1.91194e-18	2.49581	2.27973e-10	1.47913e-08	2.77618	2.71621e-38	1.48144e-35	PF00244:14-3-3 protein	-
BnaC03g04330D	2.61561	0.00332987	0.0334367	1.4499	0.154378	0.717242	1.277	0.0646508	0.272498	PF00244:14-3-3 protein	-
BnaC04g02240D	7.94597	6.40929e-10	2.50094e-08	6.73094	1.45378e-12	1.51118e-10	7.09331	1.73483e-15	1.22691e-13	PF00244:14-3-3 protein	-
BnaC03g72040D	-2.07425	1.88534e-06	4.01924e-05	-1.6389	0.000525903	0.00789486	-1.81903	2.03052e-11	8.08603e-10	PF00248:Aldo/keto reductase family	Aldo_ket_red
BnaC01g01660D	-12.3083	1.76275e-22	5.04317e-20	-5.94963	5.2973e-15	9.09944e-13	-6.6778	2.96735e-07	5.90491e-06	PF00249:Myb-like DNA-binding domain	Myb_DNA-binding
BnaC05g46800D	-8.57146	1.27942e-11	6.69613e-10	-5.4953	9.0158e-09	4.08625e-07	-6.4875	5.6496e-13	2.86583e-11	PF00249:Myb-like DNA-binding domain	Myb_DNA-binding
BnaC01g00270D	-8.31651	9.12382e-11	4.06844e-09	-6.70608	7.26021e-08	2.75607e-06	-8.49693	8.78011e-12	3.72491e-10	PF00249:Myb-like DNA-binding domain	Myb_DNA-binding
BnaA03g34140D	-8.10748	0.00199885	0.0215354	-6.45539	4.31222e-05	0.000858073	-7.36483	7.93545e-09	2.08802e-07	PF00249:Myb-like DNA-binding domain	Myb_DNA-binding
BnaC05g43530D	-7.09648	3.5749e-08	1.03847e-06	-4.54156	3.32492e-06	8.53082e-05	-4.64416	2.88101e-11	1.12174e-09	PF00249:Myb-like DNA-binding domain	Myb_DNA-binding
BnaC01g02200D	-6.27159	1.27751e-11	6.69128e-10	-3.94818	4.12027e-09	2.02651e-07	-3.99901	6.02131e-08	1.36246e-06	PF00249:Myb-like DNA-binding domain	Myb_DNA-binding
BnaC05g44010D	-4.95428	0.00378771	0.0374269	-4.08474	0.135869	0.666257	-4.1631	0.0860762	0.332013	PF00249:Myb-like DNA-binding domain	Myb_DNA-binding
BnaA03g55780D	-3.92649	2.35013e-08	7.07752e-07	-2.45509	5.04473e-05	0.00098753	-2.8393	6.02043e-06	9.20908e-05	PF00249:Myb-like DNA-binding domain	Myb_DNA-binding
BnaC03g61550D	-3.828	1.12232e-06	2.50722e-05	-2.95104	0.000689299	0.00999825	-3.4891	5.12851e-08	1.17566e-06	PF00249:Myb-like DNA-binding domain	Myb_DNA-binding
BnaC01g05660D	-3.52467	5.55346e-05	0.000888907	-3.50371	2.62105e-05	0.000552261	-4.69362	9.19028e-12	3.88201e-10	PF00249:Myb-like DNA-binding domain	Myb_DNA-binding
BnaC01g01940D	-3.39983	4.31379e-05	0.000705913	-4.23969	1.02437e-07	3.75385e-06	-5.06647	8.18627e-23	1.21857e-20	PF00249:Myb-like DNA-binding domain	Myb_DNA-binding
BnaAnng39140D	-3.25102	0.00052535	0.00667879	-2.5484	0.000900813	0.012593	-2.10275	0.00229933	0.0183631	PF00249:Myb-like DNA-binding domain	Myb_DNA-binding
BnaUnng04070D	-3.07492	1.20333e-05	0.000219904	-3.33298	2.99236e-05	0.000621164	-2.75138	4.77992e-06	7.47593e-05	PF00249:Myb-like DNA-binding domain	Myb_DNA-binding
BnaA03g02170D	-2.91056	5.25247e-05	0.000845488	-1.40657	0.143106	0.686849	-2.05311	4.94431e-06	7.72241e-05	PF00249:Myb-like DNA-binding domain	Myb_DNA-binding
BnaA06g03110D	-2.68098	6.66117e-07	1.54959e-05	-2.0308	1.28611e-06	3.67131e-05	-2.27919	1.44213e-07	3.02333e-06	PF00249:Myb-like DNA-binding domain	Myb_DNA-binding
BnaA01g30920D	-1.87534	0.00525932	0.0493472	-0.955847	0.184322	0.787066	-0.911746	0.0808416	0.318283	PF00249:Myb-like DNA-binding domain	Myb_DNA-binding
BnaC02g05270D	-1.83263	0.000857264	0.0103144	-1.47895	0.142278	0.683953	-1.18478	0.00952794	0.0616999	PF00249:Myb-like DNA-binding domain	Myb_DNA-binding
BnaA10g17920D	1.87852	0.00509878	0.0480661	2.97459	8.19272e-05	0.00152306	3.06354	0.000158451	0.0017494	PF00249:Myb-like DNA-binding domain	Myb_DNA-binding
BnaA02g03510D	2.3243	0.00489151	0.0464206	3.51911	0.0257257	0.208667	2.92927	0.00408738	0.0301093	PF00249:Myb-like DNA-binding domain	Myb_DNA-binding
BnaC08g18080D	2.99059	0.000435875	0.00566612	2.72883	2.06936e-05	0.000447688	2.4256	0.00233986	0.0186424	PF00249:Myb-like DNA-binding domain	Myb_DNA-binding
BnaA01g31080D	5.76928	0.000183646	0.00259756	5.62287	0.000517299	0.0077793	4.72717	0.00197991	0.0161269	PF00249:Myb-like DNA-binding domain	Myb_DNA-binding
BnaCnng24780D	6.15051	0.000184213	0.00260504	6.12295	0.00163632	0.0210941	6.30792	2.04924e-05	0.000276378	PF00249:Myb-like DNA-binding domain|PF00226:DnaJ domain	DnaJ
BnaC09g07170D	7.44463	2.42896e-08	7.2827e-07	7.99531	7.96627e-10	4.56136e-08	7.9423	4.02101e-10	1.31354e-08	PF00249:Myb-like DNA-binding domain|PF00538:linker histone H1 and H5 family	Myb_DNA-binding
BnaA09g10560D	6.43878	5.41057e-05	0.000867871	5.94803	0.00118518	0.0159768	6.10674	3.0347e-05	0.000393858	PF00251:Glycosyl hydrolases family 32 N-terminal domain|PF08244:Glycosyl hydrolases family 32 C terminal|PF11837:Domain of unknown function (DUF3357)	-
BnaA06g09110D	1.16911	0.000901707	0.0107754	1.15908	6.1517e-05	0.00118068	0.994362	5.05441e-05	0.000622452	PF00252:Ribosomal protein L16p/L10e	-
BnaA08g24040D	1.31154	3.2457e-06	6.60301e-05	1.17348	0.000153646	0.00265185	1.10753	6.81059e-08	1.52086e-06	PF00252:Ribosomal protein L16p/L10e	-
BnaC01g04410D	-11.5451	3.58248e-21	8.41154e-19	-6.57569	6.0483e-13	6.80162e-11	-6.70642	0.00121852	0.0105531	PF00253:Ribosomal protein S14p/S29e	Ribosomal_S14
BnaA01g03150D	1.42896	6.7561e-06	0.000129622	1.66488	1.84844e-11	1.52836e-09	1.46403	5.3435e-11	1.99397e-09	PF00253:Ribosomal protein S14p/S29e	Ribosomal_S14
BnaA09g06810D	5.9978	6.90551e-05	0.00108592	6.51765	1.90198e-05	0.00041461	5.30243	0.00102698	0.00907874	PF00254:FKBP-type peptidyl-prolyl cis-trans isomerase	FKBP_C
BnaA07g19550D	1.94949	5.7282e-07	1.34775e-05	1.82823	0.00142565	0.0187368	1.15577	0.000235822	0.00248684	PF00255:Glutathione peroxidase	GSHPx
BnaC03g24130D	2.44502	1.67903e-07	4.34207e-06	3.10209	3.10123e-08	1.2646e-06	2.69261	1.96403e-10	6.7354e-09	PF00255:Glutathione peroxidase	GSHPx
BnaC06g21970D	-1.32906	0.00298185	0.0303766	-0.856122	0.00482673	0.0531482	-1.26472	8.87585e-09	2.31669e-07	PF00257:Dehydrin	-
BnaA01g05360D	6.1178	0.000167808	0.00239794	0.827935	0.690572	0.999967	4.68571	0.00205445	0.0166328	PF00257:Dehydrin	-
BnaC08g08280D	-7.39853	2.26254e-07	5.71646e-06	-4.65948	3.76061e-05	0.000760199	-7.56735	4.1277e-09	1.13558e-07	PF00258:Flavodoxin	-
BnaC01g08190D	-2.93425	2.48855e-07	6.22969e-06	-2.67098	0.00012676	0.00224015	-2.46636	2.24102e-19	2.43286e-17	PF00258:Flavodoxin|PF00667:FAD binding domain|PF00175:Oxidoreductase NAD-binding domain	NAD_binding_1
BnaC07g28600D	0.908867	0.000295637	0.00400203	1.04225	3.70827e-05	0.00075006	0.835794	2.71195e-06	4.45518e-05	PF00266:Aminotransferase class-V	Aminotran_5
BnaC09g50970D	7.30718	1.41387e-44	3.56563e-41	6.07318	1.26567e-33	3.22088e-30	6.67444	7.6939e-11	2.80652e-09	PF00266:Aminotransferase class-V	Aminotran_5
BnaC05g45010D	-3.18261	9.81527e-13	6.11465e-11	-2.59054	8.14608e-11	5.83038e-09	-2.64772	2.30552e-12	1.07218e-10	PF00270:DEAD/DEAH box helicase|PF00271:Helicase conserved C-terminal domain	DEAD
BnaC03g41130D	0.972227	0.00326063	0.0328189	0.601871	0.0739313	0.454489	0.762872	0.000973869	0.008653	PF00270:DEAD/DEAH box helicase|PF00271:Helicase conserved C-terminal domain	DEAD
BnaA03g29860D	4.78111	7.9734e-05	0.00123055	6.67842	1.5563e-06	4.34159e-05	5.44804	9.34882e-05	0.0010871	PF00271:Helicase conserved C-terminal domain	Helicase_C
BnaA03g29880D	5.40281	0.00104288	0.012239	5.40021	0.0010392	0.0142522	4.4732	0.0203799	0.114177	PF00271:Helicase conserved C-terminal domain	Helicase_C
BnaC05g45420D	-2.22713	5.24624e-19	9.25445e-17	-2.25457	2.24454e-18	6.6763e-16	-1.93216	1.27701e-21	1.73429e-19	PF00271:Helicase conserved C-terminal domain|PF00176:SNF2 family N-terminal domain|PF09110:HAND|PF09111:SLIDE	SNF2_N
BnaC05g47920D	-3.63382	0.00164299	0.0181759	-3.06312	5.3585e-05	0.00104124	-4.61008	0.000217085	0.00231539	PF00271:Helicase conserved C-terminal domain|PF00270:DEAD/DEAH box helicase	Helicase_C
BnaA01g32110D	-1.12918	0.00454338	0.0437077	-1.29909	0.0029684	0.0351896	-1.11001	1.88271e-05	0.000256404	PF00271:Helicase conserved C-terminal domain|PF00270:DEAD/DEAH box helicase	DEAD
BnaA08g00760D	1.11105	7.01354e-05	0.00110087	0.768317	0.16427	0.741685	1.07102	6.09537e-10	1.92745e-08	PF00271:Helicase conserved C-terminal domain|PF00270:DEAD/DEAH box helicase	DEAD
BnaC06g40510D	1.55325	2.06593e-07	5.26858e-06	1.07099	0.0165531	0.146765	1.41403	9.68106e-11	3.4811e-09	PF00271:Helicase conserved C-terminal domain|PF00270:DEAD/DEAH box helicase	Helicase_C
BnaAnng08750D	2.07298	0.00284625	0.0291698	2.01447	0.0175392	0.15355	3.09473	8.88446e-06	0.000130316	PF00271:Helicase conserved C-terminal domain|PF00270:DEAD/DEAH box helicase	DEAD
BnaC01g39020D	9.14178	4.67357e-13	3.10466e-11	5.77198	8.43075e-17	1.95043e-14	7.20575	2.22109e-23	3.47305e-21	PF00271:Helicase conserved C-terminal domain|PF00270:DEAD/DEAH box helicase	DEAD
BnaC02g37070D	-2.1093	0.000240086	0.00332203	-1.04876	0.0742628	0.455426	-1.69626	0.000605211	0.00571006	PF00271:Helicase conserved C-terminal domain|PF02889:Sec63 Brl domain|PF00270:DEAD/DEAH box helicase	Sec63
BnaC01g03720D	-9.62405	6.4818e-10	2.52779e-08	-5.68523	1.45837e-10	9.80478e-09	-4.17993	0.0163735	0.0960292	PF00278:Pyridoxal-dependent decarboxylase, C-terminal sheet domain|PF02784:Pyridoxal-dependent decarboxylase, pyridoxal binding domain	-
BnaA06g36650D	2.97415	0.000200925	0.00282144	2.44958	0.0180461	0.156936	1.01425	0.241296	0.612149	PF00280:Potato inhibitor I family	-
BnaC03g58220D	1.01829	0.00218543	0.0232114	1.16145	0.00100292	0.0138402	0.963494	0.000324613	0.00328844	PF00282:Pyridoxal-dependent decarboxylase conserved domain	-
BnaC03g08350D	1.76989	0.000291191	0.00394969	1.56118	0.00102883	0.0141354	1.72094	1.47597e-11	6.05087e-10	PF00282:Pyridoxal-dependent decarboxylase conserved domain	-
BnaC03g47540D	-1.39012	9.17629e-05	0.00139875	-1.19046	0.008436	0.0851031	-1.33041	6.53396e-07	1.21511e-05	PF00288:GHMP kinases N terminal domain|PF08544:GHMP kinases C terminal	GHMP_kinases
BnaA04g27890D	-10.4444	9.21738e-15	8.24243e-13	-7.08517	1.05714e-15	2.03463e-13	-6.70554	2.30339e-27	5.09857e-25	PF00291:Pyridoxal-phosphate dependent enzyme	PALP
BnaC01g08620D	-3.94178	7.41214e-25	2.75792e-22	-2.88058	2.56903e-07	8.57716e-06	-3.36587	2.10931e-34	8.45907e-32	PF00291:Pyridoxal-phosphate dependent enzyme	PALP
BnaA04g01540D	0.927843	0.000245198	0.00338725	0.800867	0.00197629	0.024802	0.979673	1.41313e-08	3.54979e-07	PF00291:Pyridoxal-phosphate dependent enzyme	PALP
BnaC05g42980D	-3.05299	5.24957e-10	2.08182e-08	-2.82138	4.4843e-06	0.000111314	-2.706	1.54897e-11	6.3273e-10	PF00291:Pyridoxal-phosphate dependent enzyme|PF00585:C-terminal regulatory domain of Threonine dehydratase	PALP
BnaA03g30400D	3.2767	1.69407e-07	4.37433e-06	3.62674	1.44387e-07	5.12174e-06	5.02237	1.02069e-18	1.04485e-16	PF00291:Pyridoxal-phosphate dependent enzyme|PF00585:C-terminal regulatory domain of Threonine dehydratase	PALP
BnaCnng05930D	-5.78994	1.85734e-33	1.66405e-30	-4.03954	8.44495e-12	7.50013e-10	-4.86944	4.14669e-48	5.43663e-45	PF00293:NUDIX domain	NUDIX
BnaC05g09220D	-2.58063	0.00159707	0.0177399	-2.4348	0.00259906	0.0313858	-5.57386	0.000116483	0.00132799	PF00293:NUDIX domain	NUDIX
BnaA05g33360D	1.31208	0.000736647	0.00900522	1.52542	0.000199651	0.0033426	1.1911	6.9686e-07	1.28717e-05	PF00293:NUDIX domain	NUDIX
BnaA08g17580D	4.65365	0.000261371	0.0035845	4.91043	5.54965e-06	0.000135027	7.08691	1.58599e-07	3.30258e-06	PF00293:NUDIX domain	NUDIX
BnaUnng01130D	-10.5717	3.77191e-16	4.26433e-14	-7.44302	8.77067e-13	9.47716e-11	-8.36534	6.54223e-15	4.23574e-13	PF00294:pfkB family carbohydrate kinase	PfkB
BnaA01g32050D	-1.62057	2.67206e-10	1.11009e-08	-1.29865	2.7661e-05	0.000579447	-1.57359	1.29989e-19	1.44806e-17	PF00294:pfkB family carbohydrate kinase	PfkB
BnaC07g50370D	1.10792	0.000112855	0.00167965	1.58537	0.00142105	0.0186872	1.31181	0.000252719	0.00264181	PF00294:pfkB family carbohydrate kinase	PfkB
BnaC01g38960D	1.7933	1.38515e-12	8.45884e-11	1.80222	2.2829e-09	1.17409e-07	1.8365	2.95103e-23	4.56212e-21	PF00294:pfkB family carbohydrate kinase	PfkB
BnaC01g04770D	-7.34835	2.39028e-07	6.008e-06	-7.45255	1.96185e-08	8.3778e-07	-6.72831	6.10103e-07	1.1402e-05	PF00295:Glycosyl hydrolases family 28	-
BnaC01g06140D	-6.25498	0.000190733	0.00268886	-6.51369	3.35445e-06	8.59375e-05	-4.70557	0.0092128	0.0600126	PF00295:Glycosyl hydrolases family 28	-
BnaC05g44070D	-6.01555	4.80178e-07	1.14321e-05	-5.10277	3.49512e-08	1.41016e-06	-3.88273	5.17602e-05	0.000636278	PF00295:Glycosyl hydrolases family 28	-
BnaCnng50710D	5.30666	0.00124091	0.0142439	4.54289	0.00602647	0.0640989	5.62187	0.00024995	0.00261679	PF00295:Glycosyl hydrolases family 28	-
BnaC04g24140D	5.65579	2.48144e-11	1.23421e-09	4.77746	7.20315e-08	2.73744e-06	5.3275	2.4864e-18	2.46027e-16	PF00295:Glycosyl hydrolases family 28	-
BnaC03g72020D	4.38665	1.07672e-17	1.54348e-15	3.98299	4.23712e-30	7.10078e-27	3.84113	1.81972e-52	3.5446e-49	PF00298:Ribosomal protein L11, RNA binding domain|PF03946:Ribosomal protein L11, N-terminal domain	-
BnaC05g46610D	-2.3646	0.000653293	0.00809482	-2.9807	6.93734e-07	2.10355e-05	-2.22778	4.69004e-08	1.08096e-06	PF00300:Histidine phosphatase superfamily (branch 1)	-
BnaCnng60150D	-1.48057	0.000553517	0.00699508	-1.78829	0.00253231	0.0306923	-1.38674	3.37984e-12	1.53208e-10	PF00300:Histidine phosphatase superfamily (branch 1)	-
BnaA07g18660D	1.09129	4.38165e-05	0.000716328	0.756633	0.0940039	0.528721	0.71036	0.000736735	0.00678752	PF00300:Histidine phosphatase superfamily (branch 1)	-
BnaA06g05220D	2.40734	7.86975e-05	0.00121731	2.57656	0.019117	0.164433	0.882214	0.00152119	0.012794	PF00300:Histidine phosphatase superfamily (branch 1)	-
BnaC05g07410D	4.17095	6.4384e-08	1.80188e-06	3.03121	0.0129576	0.120574	3.75126	3.21349e-25	5.85784e-23	PF00300:Histidine phosphatase superfamily (branch 1)	-
BnaC01g03830D	-5.88432	9.59018e-13	5.9799e-11	-4.49386	9.96654e-16	1.92902e-13	-4.96013	1.30367e-19	1.44991e-17	PF00303:Thymidylate synthase|PF00186:Dihydrofolate reductase	-
BnaA01g02590D	2.00334	3.55174e-09	1.21712e-07	1.92229	3.24252e-08	1.31675e-06	2.07528	1.54503e-18	1.5582e-16	PF00303:Thymidylate synthase|PF00186:Dihydrofolate reductase	-
BnaC01g00250D	-6.54548	1.22057e-06	2.71157e-05	-5.61139	8.47167e-06	0.000199345	-5.40815	3.66016e-08	8.59577e-07	PF00304:Gamma-thionin family	-
BnaC06g04850D	-1.82814	0.00062998	0.00783345	-1.68489	0.00461247	0.0512986	-1.96243	7.76038e-05	0.000917094	PF00304:Gamma-thionin family	-
BnaC06g09980D	2.37085	6.195e-10	2.42149e-08	1.8489	5.43142e-06	0.000132338	2.15576	1.32557e-10	4.65595e-09	PF00311:Phosphoenolpyruvate carboxylase	-
BnaC06g40390D	1.36109	1.4925e-06	3.24579e-05	1.38464	1.74149e-07	6.04945e-06	1.48678	9.42927e-10	2.89312e-08	PF00312:Ribosomal protein S15	-
BnaC01g02610D	-8.27325	8.10752e-20	1.57728e-17	-4.65102	0.0358994	0.268129	-7.04545	4.02359e-07	7.80406e-06	PF00314:Thaumatin family	Thaumatin
BnaC04g26950D	-7.54678	2.19825e-08	6.66137e-07	-7.24746	2.76131e-07	9.16126e-06	-3.89373	5.32555e-05	0.000653129	PF00314:Thaumatin family	Thaumatin
BnaC06g35830D	-5.33225	0.000366249	0.00483956	-2.7157	0.0446192	0.316811	-5.49575	0.000367644	0.00366976	PF00314:Thaumatin family	Thaumatin
BnaCnng23350D	-2.37777	6.86692e-05	0.00108085	-2.43836	0.000118483	0.00210906	-2.63989	0.000130038	0.00146513	PF00314:Thaumatin family	Thaumatin
BnaC06g36470D	1.53896	6.47825e-07	1.50807e-05	1.59324	0.000436411	0.0067034	1.30115	1.89491e-11	7.59657e-10	PF00314:Thaumatin family	Thaumatin
BnaC04g31990D	2.71577	0.000271386	0.0037069	2.7994	0.000115763	0.00206653	2.50912	6.82502e-07	1.26304e-05	PF00314:Thaumatin family	Thaumatin
BnaC06g35810D	2.92782	0.000483494	0.00620928	2.82696	0.0455022	0.320991	1.77015	0.210728	0.569335	PF00314:Thaumatin family	Thaumatin
BnaC04g15370D	3.60662	1.46584e-12	8.88784e-11	2.39134	1.13967e-06	3.29575e-05	2.44593	1.62759e-07	3.37785e-06	PF00314:Thaumatin family	Thaumatin
BnaC06g35850D	5.28037	0.00316479	0.0319581	4.47469	0.0334529	0.255252	3.52645	0.30186	1	PF00314:Thaumatin family	Thaumatin
BnaAnng18020D	7.89608	1.71032e-08	5.25294e-07	5.56589	9.65852e-07	2.84701e-05	7.15872	1.07189e-07	2.30309e-06	PF00314:Thaumatin family	Thaumatin
BnaC03g58110D	-5.59633	0.000560866	0.00706829	-5.49347	0.000556558	0.00829704	-5.44002	0.000525347	0.00503884	PF00318:Ribosomal protein S2	-
BnaA07g23080D	-1.29478	0.000269937	0.00368785	-1.50281	2.72473e-07	9.04862e-06	-1.35039	3.56438e-10	1.17507e-08	PF00318:Ribosomal protein S2	-
BnaC02g38130D	-5.84118	0.000209781	0.00293672	-5.40606	0.0192883	0.1656	-5.99582	4.60598e-05	0.000572874	PF00319:SRF-type transcription factor (DNA-binding and dimerisation domain)	SRF-TF
BnaC06g33560D	-4.57795	6.26872e-08	1.76018e-06	-3.58342	0.0011805	0.015923	-2.81764	0.000302733	0.00309386	PF00319:SRF-type transcription factor (DNA-binding and dimerisation domain)	SRF-TF
BnaCnng56720D	-2.39154	9.59969e-06	0.000178936	-2.82726	4.87885e-05	0.000959159	-2.26987	9.90478e-11	3.55779e-09	PF00319:SRF-type transcription factor (DNA-binding and dimerisation domain)	SRF-TF
BnaA06g28250D	2.56961	0.0037915	0.0374589	4.35193	0.000212578	0.00353702	3.43509	0.00673285	0.0461882	PF00319:SRF-type transcription factor (DNA-binding and dimerisation domain)	SRF-TF
BnaC03g16530D	-6.29313	2.7163e-05	0.000463083	-6.39779	9.40067e-06	0.000219104	-5.24746	0.00116201	0.0101203	PF00319:SRF-type transcription factor (DNA-binding and dimerisation domain)|PF01486:K-box region	SRF-TF
BnaA09g21280D	-5.5103	6.48184e-15	6.00483e-13	-4.80405	1.83551e-19	6.74427e-17	-4.92357	2.17768e-32	7.17224e-30	PF00319:SRF-type transcription factor (DNA-binding and dimerisation domain)|PF01486:K-box region	SRF-TF
BnaA05g02990D	-4.33344	3.8215e-05	0.00063173	-1.15455	0.209615	0.835277	-1.05889	0.225217	0.590441	PF00319:SRF-type transcription factor (DNA-binding and dimerisation domain)|PF01486:K-box region	SRF-TF
BnaA02g33230D	-1.49996	0.00469095	0.0447794	-2.18501	0.000204972	0.00342167	-1.25811	0.00754642	0.0507942	PF00319:SRF-type transcription factor (DNA-binding and dimerisation domain)|PF01486:K-box region	SRF-TF
BnaA01g02900D	1.45964	0.000466094	0.00601418	1.14582	0.0291467	0.229954	1.08314	6.91304e-05	0.000826558	PF00319:SRF-type transcription factor (DNA-binding and dimerisation domain)|PF01486:K-box region	SRF-TF
BnaC07g04450D	7.79663	3.34596e-08	9.79492e-07	3.93754	0.00265514	0.0319892	7.47134	9.92845e-09	2.5737e-07	PF00319:SRF-type transcription factor (DNA-binding and dimerisation domain)|PF01486:K-box region	SRF-TF
BnaC06g41200D	-8.31398	1.24789e-09	4.63051e-08	-6.28915	6.27159e-08	2.41007e-06	-8.55518	4.30605e-11	1.63185e-09	PF00320:GATA zinc finger	GATA
BnaA08g17340D	2.83888	2.88905e-05	0.000489714	4.23954	1.69325e-20	7.65418e-18	2.6399	4.84229e-19	5.12621e-17	PF00324:Amino acid permease|PF03522:Solute carrier family 12	AA_permease
BnaC04g52020D	-6.19136	6.55653e-05	0.00103631	-6.47583	1.40964e-05	0.000316628	-6.46387	2.34838e-05	0.000312884	PF00326:Prolyl oligopeptidase family	-
BnaA08g30180D	-2.2525	6.1398e-06	0.000118768	-1.49995	0.0100061	0.0978399	-1.96311	7.11323e-12	3.05963e-10	PF00326:Prolyl oligopeptidase family	-
BnaC09g07590D	6.88632	1.0395e-06	2.3383e-05	7.08699	3.89349e-07	1.24603e-05	7.46997	1.28531e-08	3.25269e-07	PF00326:Prolyl oligopeptidase family|PF02897:Prolyl oligopeptidase, N-terminal beta-propeller domain	-
BnaCnng05740D	1.13174	0.000962988	0.0114195	1.42315	0.00572458	0.0614492	1.51547	2.85354e-12	1.30566e-10	PF00328:Histidine phosphatase superfamily (branch 2)	Acid_phosphat_A
BnaC03g06720D	1.91522	7.13696e-06	0.000136391	1.93298	0.0283479	0.225203	1.16518	5.04466e-05	0.000621363	PF00328:Histidine phosphatase superfamily (branch 2)	Acid_phosphat_A
BnaA01g01700D	0.87258	2.86887e-05	0.000487021	0.852619	0.0046949	0.0520049	0.792162	7.32453e-06	0.000109821	PF00330:Aconitase family (aconitate hydratase)|PF00694:Aconitase C-terminal domain	Aconitase
BnaA07g19070D	-3.41035	9.26979e-05	0.00141086	-4.33702	7.64044e-06	0.000181338	-3.37667	0.000284521	0.00293235	PF00332:Glycosyl hydrolases family 17	Glyco_hydro_17
BnaC05g47540D	-9.73284	1.20087e-11	6.31905e-10	-3.82415	0.00164064	0.0211356	-9.43254	4.60073e-14	2.68314e-12	PF00332:Glycosyl hydrolases family 17|PF07983:X8 domain	Glyco_hydro_17
BnaC09g12840D	-3.22086	1.43924e-13	1.03157e-11	-3.20835	2.75941e-12	2.72412e-10	-3.77358	2.29732e-27	5.09857e-25	PF00332:Glycosyl hydrolases family 17|PF07983:X8 domain	Glyco_hydro_17
BnaA04g19830D	-2.17169	5.87078e-08	1.65664e-06	-1.67184	0.00325303	0.0380258	-1.90979	8.14123e-08	1.78871e-06	PF00333:Ribosomal protein S5, N-terminal domain|PF03719:Ribosomal protein S5, C-terminal domain	-
BnaA09g22160D	-1.95126	1.23059e-07	3.26674e-06	-1.80775	5.15927e-06	0.000126424	-1.56341	1.4936e-13	8.13972e-12	PF00334:Nucleoside diphosphate kinase	NDK
BnaA08g23130D	-1.43749	0.000200111	0.00281175	-1.04968	0.023787	0.196372	-1.24778	2.44443e-05	0.00032473	PF00334:Nucleoside diphosphate kinase	NDK
BnaA03g32670D	-2.22204	0.00115998	0.0134281	-2.1062	0.00100413	0.0138542	-1.26426	0.0887076	0.339169	PF00338:Ribosomal protein S10p/S20e	Ribosomal_S10
BnaC01g16480D	2.81123	8.17274e-13	5.18147e-11	2.977	5.54396e-10	3.30952e-08	3.32904	2.20815e-33	7.88183e-31	PF00342:Phosphoglucose isomerase	-
BnaA04g20040D	1.49438	1.45084e-07	3.79959e-06	1.14393	0.0173627	0.152264	1.40978	2.19708e-14	1.3458e-12	PF00344:SecY translocase|PF10559:Plug domain of Sec61p	-
BnaC03g48390D	-3.97103	8.89186e-10	3.38622e-08	-3.32597	1.73756e-07	6.04188e-06	-3.57185	1.15386e-15	8.33324e-14	PF00347:Ribosomal protein L6	-
BnaCnng67790D	-7.67124	7.60617e-10	2.93076e-08	-7.3582	2.84142e-11	2.25443e-09	-5.68516	0.00127157	0.0109666	PF00348:Polyprenyl synthetase	-
BnaA06g35250D	-6.93144	2.57609e-18	4.09834e-16	-6.26708	4.45518e-17	1.06987e-14	-6.67301	6.14583e-35	2.66878e-32	PF00348:Polyprenyl synthetase	-
BnaC01g02050D	-4.4393	7.34061e-09	2.3881e-07	-4.25317	2.06545e-09	1.07107e-07	-3.61486	4.71598e-10	1.52377e-08	PF00348:Polyprenyl synthetase	-
BnaCnng23390D	-2.42921	2.27093e-09	8.01607e-08	-2.225	1.12386e-05	0.000257917	-2.23325	2.38155e-12	1.10603e-10	PF00348:Polyprenyl synthetase	-
BnaAnng17980D	1.13533	0.00200358	0.0215761	1.44633	7.71602e-06	0.000183006	0.854238	0.00719395	0.0487772	PF00348:Polyprenyl synthetase	-
BnaA01g01020D	1.9339	1.47263e-05	0.000264852	1.75159	7.02581e-09	3.25738e-07	1.85871	2.90443e-09	8.21969e-08	PF00348:Polyprenyl synthetase	-
BnaC01g04590D	-2.75312	9.45689e-23	2.83669e-20	-2.69159	2.0576e-20	9.06267e-18	-3.13537	1.49252e-33	5.47063e-31	PF00350:Dynamin family|PF01031:Dynamin central region|PF02212:Dynamin GTPase effector domain	-
BnaC03g05860D	-10.1294	1.77731e-16	2.12533e-14	-5.87618	3.00122e-08	1.226e-06	-6.34333	7.90284e-05	0.000933282	PF00355:Rieske [2Fe-2S] domain|PF02921:Ubiquinol cytochrome reductase transmembrane region	-
BnaC06g34180D	-3.35127	9.28719e-08	2.52825e-06	-3.92086	2.93263e-12	2.87859e-10	-3.62174	1.55665e-13	8.45624e-12	PF00364:Biotin-requiring enzyme	Biotin_lipoyl
BnaC03g13370D	-2.94794	0.000135143	0.00197384	-3.14633	0.000335787	0.00532102	-2.41493	1.83286e-11	7.36339e-10	PF00365:Phosphofructokinase	PFK
BnaC06g37390D	1.84791	0.00504133	0.0476102	1.8006	0.00481522	0.053064	1.25248	2.51066e-07	5.06112e-06	PF00365:Phosphofructokinase	PFK
BnaC04g06970D	-8.97806	3.71839e-11	1.77179e-09	-6.18541	8.66564e-10	4.93282e-08	-7.06815	1.88683e-08	4.63221e-07	PF00366:Ribosomal protein S17	-
BnaA06g11400D	-2.15165	5.16931e-05	0.000833688	-0.631444	0.357715	0.999967	-1.98684	0.000188006	0.00203776	PF00378:Enoyl-CoA hydratase/isomerase	ECH
BnaA08g30740D	-1.96483	1.54348e-11	7.99828e-10	-2.08292	7.92289e-06	0.000187524	-1.85843	1.7966e-13	9.66735e-12	PF00378:Enoyl-CoA hydratase/isomerase|PF02737:3-hydroxyacyl-CoA dehydrogenase, NAD binding domain|PF00725:3-hydroxyacyl-CoA dehydrogenase, C-terminal domain	3HCDH_N
BnaC05g45070D	-1.38567	0.000522259	0.00664198	-1.37233	0.00270822	0.0325204	-1.26805	4.24282e-06	6.70437e-05	PF00378:Enoyl-CoA hydratase/isomerase|PF02737:3-hydroxyacyl-CoA dehydrogenase, NAD binding domain|PF00725:3-hydroxyacyl-CoA dehydrogenase, C-terminal domain	3HCDH_N
BnaC05g47390D	-11.0724	4.1392e-19	7.37806e-17	-4.96585	3.32125e-05	0.000680594	-7.5904	2.63523e-06	4.33855e-05	PF00380:Ribosomal protein S9/S16	-
BnaA06g16180D	1.0826	0.00190146	0.0206133	1.17279	6.32747e-05	0.00121103	1.12636	4.93055e-06	7.70268e-05	PF00380:Ribosomal protein S9/S16	-
BnaA05g33140D	1.12642	0.00217786	0.0231491	1.16626	0.000161089	0.00276572	1.0539	4.19861e-07	8.11575e-06	PF00380:Ribosomal protein S9/S16	-
BnaAnng17430D	3.75109	2.23898e-33	1.97993e-30	3.41714	6.37441e-13	7.11016e-11	3.96917	1.1244e-65	5.89668e-62	PF00380:Ribosomal protein S9/S16	-
BnaA03g06690D	-3.97399	1.47103e-12	8.91139e-11	-3.4737	0.0033721	0.0391975	-3.80721	9.65437e-18	8.91865e-16	PF00385:Chromo (CHRromatin Organisation MOdifier) domain	Chromo
BnaAnng15950D	5.88649	8.66305e-05	0.00132945	5.8412	0.000149928	0.00259419	4.383	0.000707907	0.00654759	PF00385:Chromo (CHRromatin Organisation MOdifier) domain	Chromo
BnaA02g07530D	-5.62228	1.54568e-09	5.63722e-08	-4.09944	0.000140081	0.00244227	-4.63685	1.07804e-17	9.87855e-16	PF00387:Phosphatidylinositol-specific phospholipase C, Y domain|PF00168:C2 domain|PF00388:Phosphatidylinositol-specific phospholipase C, X domain	PI-PLC-X
BnaC05g48310D	-2.78579	5.35039e-10	2.11441e-08	-2.35411	0.00296162	0.0351274	-3.13884	4.87606e-52	8.98461e-49	PF00393:6-phosphogluconate dehydrogenase, C-terminal domain|PF03446:NAD binding domain of 6-phosphogluconate dehydrogenase	NAD_binding_2
BnaA07g29090D	-1.59071	0.00105992	0.0124026	-2.09943	0.00101914	0.0140274	-2.52757	2.27487e-14	1.38971e-12	PF00394:Multicopper oxidase|PF07731:Multicopper oxidase	-
BnaA04g29320D	2.0074	7.05344e-05	0.00110612	1.26365	0.0422309	0.303492	1.55724	1.25617e-05	0.000178121	PF00394:Multicopper oxidase|PF07732:Multicopper oxidase|PF07731:Multicopper oxidase	-
BnaA05g00540D	-2.40299	1.54802e-11	8.0139e-10	-2.62292	1.05201e-06	3.07068e-05	-2.65812	1.63058e-12	7.74679e-11	PF00398:Ribosomal RNA adenine dimethylase	-
BnaC01g03920D	-6.93762	6.74417e-25	2.52317e-22	-5.05087	1.96018e-13	2.50341e-11	-4.53654	3.51801e-33	1.21748e-30	PF00400:WD domain, G-beta repeat	WD40
BnaC01g04030D	-6.78728	1.40478e-07	3.69316e-06	-4.01669	9.51518e-05	0.00174065	-6.4743	6.92383e-07	1.28063e-05	PF00400:WD domain, G-beta repeat	WD40
BnaC01g08630D	-6.29906	3.59886e-22	9.92106e-20	-5.51928	2.35133e-13	2.95897e-11	-5.49001	3.66579e-34	1.44462e-31	PF00400:WD domain, G-beta repeat	WD40
BnaC03g05900D	-4.16778	2.14617e-24	7.69129e-22	-3.55315	2.4863e-07	8.32929e-06	-3.76402	2.74572e-24	4.61065e-22	PF00400:WD domain, G-beta repeat	WD40
BnaC01g08600D	-3.61164	6.2626e-08	1.75919e-06	-2.78946	0.000320389	0.00510526	-3.16864	5.08158e-08	1.16631e-06	PF00400:WD domain, G-beta repeat	WD40
BnaA01g02660D	1.68197	0.000146028	0.00211692	1.84565	3.96316e-05	0.000795021	1.47315	1.24313e-07	2.64189e-06	PF00400:WD domain, G-beta repeat	WD40
BnaA06g16110D	5.43914	0.00087462	0.0104922	5.71192	0.00116143	0.0156997	5.84264	0.000170124	0.00186649	PF00400:WD domain, G-beta repeat	WD40
BnaC01g00490D	-3.57057	6.78972e-38	8.56146e-35	-3.37092	8.53801e-36	3.45086e-32	-3.24376	9.03987e-44	7.16631e-41	PF00400:WD domain, G-beta repeat|PF06957:Coatomer (COPI) alpha subunit C-terminus|PF04053:Coatomer WD associated region	Coatomer_WDAD
BnaC05g46560D	-8.91024	1.17959e-29	6.98433e-27	-4.96043	4.91102e-05	0.000963828	-7.37047	1.22627e-05	0.000174171	PF00403:Heavy-metal-associated domain	HMA
BnaAnng00410D	-7.77911	4.71253e-10	1.88864e-08	-6.54288	3.70505e-11	2.84759e-09	-7.91813	1.30239e-10	4.57925e-09	PF00403:Heavy-metal-associated domain	HMA
BnaC01g09040D	-5.85616	0.00017398	0.00247317	-5.53573	0.000412417	0.00639232	-6.01123	3.47913e-05	0.000446272	PF00403:Heavy-metal-associated domain	HMA
BnaA07g15730D	-2.38177	7.20941e-07	1.66745e-05	-1.92839	0.00235978	0.0289123	-2.56342	1.58703e-12	7.57155e-11	PF00403:Heavy-metal-associated domain	HMA
BnaAnng01020D	-1.61063	2.04466e-09	7.28154e-08	-1.61976	1.80082e-07	6.24604e-06	-1.65925	8.18073e-17	6.75218e-15	PF00403:Heavy-metal-associated domain	HMA
BnaA05g31400D	1.17287	1.15362e-05	0.000211557	1.1664	0.0153641	0.138285	1.16723	8.31815e-06	0.000123068	PF00403:Heavy-metal-associated domain	HMA
BnaA10g17270D	1.67989	1.79533e-06	3.843e-05	1.18902	0.152892	0.712992	2.05547	5.24829e-05	0.00064435	PF00403:Heavy-metal-associated domain	HMA
BnaA03g57410D	2.26085	2.80811e-05	0.000477659	2.52221	0.000565157	0.00840561	2.31644	1.27514e-05	0.00018051	PF00403:Heavy-metal-associated domain	HMA
BnaC05g08920D	3.49122	1.16703e-05	0.000213729	1.73888	0.00288556	0.0343438	1.96184	0.00161626	0.0134971	PF00403:Heavy-metal-associated domain	HMA
BnaA02g03610D	4.77363	1.62284e-06	3.50574e-05	3.66186	1.0116e-06	2.96404e-05	3.50351	8.0639e-05	0.000949835	PF00403:Heavy-metal-associated domain	HMA
BnaA01g07380D	5.54755	0.00144679	0.0162403	3.47777	0.0542905	0.364308	3.93256	0.0839042	0.326293	PF00403:Heavy-metal-associated domain	HMA
BnaC04g45130D	7.04393	1.80743e-06	3.86405e-05	6.71169	1.74546e-06	4.81456e-05	7.85787	3.05482e-09	8.60245e-08	PF00403:Heavy-metal-associated domain	HMA
BnaAnng32580D	-2.89032	1.213e-23	4.04875e-21	-2.82644	6.5522e-11	4.7941e-09	-2.74024	8.50675e-35	3.60221e-32	PF00406:Adenylate kinase	ADK
BnaA03g27260D	-1.06469	0.00366096	0.036338	-1.32114	0.000984616	0.0136287	-1.49722	4.14146e-06	6.55252e-05	PF00406:Adenylate kinase	ADK
BnaC07g48060D	1.90515	0.00477495	0.0455135	3.48713	0.00014828	0.00256827	2.69082	0.00150427	0.0126784	PF00406:Adenylate kinase	ADK
BnaC03g76760D	-7.69586	2.68301e-26	1.14181e-23	-7.38536	4.01926e-31	7.08111e-28	-5.92657	2.20691e-06	3.69677e-05	PF00407:Pathogenesis-related protein Bet v I family	-
BnaA02g15220D	1.28859	0.000978727	0.0115819	1.7602	0.00273037	0.0327463	1.06622	0.00285598	0.0221389	PF00407:Pathogenesis-related protein Bet v I family	-
BnaC06g24430D	2.17422	0.00200693	0.0216088	2.29568	0.00216238	0.0267707	2.50236	1.50236e-42	1.05592e-39	PF00407:Pathogenesis-related protein Bet v I family	-
BnaA07g28950D	2.74795	1.39821e-05	0.000252938	1.77101	0.00703723	0.0731509	2.76208	4.24333e-06	6.70437e-05	PF00407:Pathogenesis-related protein Bet v I family	-
BnaA10g14950D	4.4437	0.000455213	0.00589837	2.14558	0.00723021	0.0747836	4.48409	5.73266e-10	1.8246e-08	PF00407:Pathogenesis-related protein Bet v I family	-
BnaA07g28930D	7.10831	3.00902e-05	0.000508279	6.32909	8.78985e-05	0.00162265	3.01505	0.182177	0.526476	PF00407:Pathogenesis-related protein Bet v I family	-
BnaC08g26710D	0.909282	0.000351921	0.00467655	1.08481	0.00710446	0.0737494	0.762812	0.000377203	0.00375419	PF00412:LIM domain	LIM
BnaA09g07790D	-6.59021	2.56942e-06	5.34376e-05	-5.82653	0.000194984	0.00327483	-6.56522	2.23482e-06	3.73983e-05	PF00412:LIM domain|PF12315:Protein of unknown function (DUF3633)	LIM
BnaC01g02020D	-2.69065	1.12675e-13	8.26738e-12	-2.67056	2.15417e-06	5.7897e-05	-2.09272	1.1592e-18	1.17604e-16	PF00412:LIM domain|PF12315:Protein of unknown function (DUF3633)	LIM
BnaA01g00990D	1.07764	0.00461986	0.044274	0.868016	0.157916	0.726188	1.10611	5.14176e-08	1.1783e-06	PF00412:LIM domain|PF12315:Protein of unknown function (DUF3633)	LIM
BnaC09g07960D	4.14173	1.5424e-12	9.28588e-11	2.53668	0.00989981	0.0969936	1.83495	0.00111538	0.00975654	PF00412:LIM domain|PF12315:Protein of unknown function (DUF3633)	LIM
BnaA06g22980D	-1.43284	2.55045e-06	5.30754e-05	-1.07394	0.0178859	0.155868	-1.45364	4.98238e-09	1.35524e-07	PF00415:Regulator of chromosome condensation (RCC1) repeat	-
BnaA05g32730D	2.44579	2.86303e-06	5.89675e-05	2.23005	2.45625e-08	1.0216e-06	2.17411	1.40065e-11	5.74898e-10	PF00415:Regulator of chromosome condensation (RCC1) repeat|PF12796:Ankyrin repeats (3 copies)	-
BnaAnng24540D	-1.64656	0.000103544	0.00155708	-1.97155	4.59187e-08	1.81326e-06	-1.4717	7.79412e-08	1.71909e-06	PF00428:60s Acidic ribosomal protein	-
BnaC01g06270D	-9.68823	1.40061e-14	1.20415e-12	-6.98116	6.96263e-12	6.30306e-10	-6.56324	1.4236e-16	1.14452e-14	PF00430:ATP synthase B/B' CF(0)	-
BnaA01g04740D	8.71724	2.27947e-12	1.33918e-10	7.25016	8.34106e-13	9.05363e-11	9.56273	4.17004e-15	2.77092e-13	PF00430:ATP synthase B/B' CF(0)	-
BnaA09g22130D	-1.72587	2.48267e-05	0.000426564	-1.28742	0.0032125	0.0376096	-1.92171	1.41854e-12	6.83947e-11	PF00436:Single-strand binding protein family	-
BnaA06g24530D	-1.63838	0.000132178	0.00193468	-1.04403	0.0627567	0.404542	-1.49666	1.8898e-05	0.000257215	PF00439:Bromodomain|PF17035:Bromodomain extra-terminal - transcription regulation	Bromodomain
BnaC01g00780D	-10.318	4.80699e-17	6.19911e-15	-4.85602	4.28167e-08	1.69956e-06	-6.22551	4.19372e-31	1.22184e-28	PF00443:Ubiquitin carboxyl-terminal hydrolase	UCH
BnaC03g61300D	-6.64985	1.40843e-06	3.08464e-05	-6.03736	4.16596e-05	0.000831618	-3.95502	0.000668048	0.00622367	PF00443:Ubiquitin carboxyl-terminal hydrolase	UCH
BnaA01g34630D	0.977783	4.62999e-05	0.000752951	0.921338	0.000662685	0.00966526	0.809229	4.33687e-05	0.000542515	PF00443:Ubiquitin carboxyl-terminal hydrolase	UCH
BnaC01g06800D	-9.56956	1.06605e-14	9.4271e-13	-6.26925	2.28087e-14	3.49039e-12	-6.25732	6.04608e-15	3.94447e-13	PF00443:Ubiquitin carboxyl-terminal hydrolase|PF01753:MYND finger	UCH
BnaC05g47310D	-5.15013	0.00242746	0.025386	-5.65036	0.000278754	0.00450663	-5.55689	0.000291641	0.00299577	PF00443:Ubiquitin carboxyl-terminal hydrolase|PF04781:Protein of unknown function (DUF627)|PF04780:Protein of unknown function (DUF629)	UCH
BnaC01g11370D	-3.62824	4.86251e-07	1.15686e-05	-2.44148	0.00132651	0.0176206	-2.737	5.86197e-05	0.000711493	PF00447:HSF-type DNA-binding	HSF_DNA-bind
BnaA03g28190D	-1.93516	0.000282519	0.00384356	-1.90858	3.35079e-05	0.000686032	-2.01009	3.41899e-05	0.000439383	PF00447:HSF-type DNA-binding	HSF_DNA-bind
BnaA05g32280D	1.80345	7.01547e-05	0.00110092	1.11816	0.0456936	0.322044	1.79519	8.59882e-08	1.87764e-06	PF00447:HSF-type DNA-binding	HSF_DNA-bind
BnaAnng36200D	1.99833	0.000308251	0.00415708	2.05799	0.0257738	0.208881	1.0315	0.0072422	0.0490653	PF00447:HSF-type DNA-binding	HSF_DNA-bind
BnaC06g34280D	-8.62996	1.12582e-11	5.94709e-10	-6.55651	1.33734e-09	7.24675e-08	-7.60597	4.98555e-09	1.35524e-07	PF00450:Serine carboxypeptidase	Peptidase_S10
BnaC05g44060D	-7.78051	3.39617e-09	1.16851e-07	-3.58311	1.4032e-06	3.97093e-05	-3.30309	4.06074e-09	1.11857e-07	PF00450:Serine carboxypeptidase	Peptidase_S10
BnaC05g42700D	-6.30157	1.55055e-15	1.59725e-13	-5.22402	3.97928e-08	1.58778e-06	-6.05419	1.15871e-05	0.000165715	PF00450:Serine carboxypeptidase	Peptidase_S10
BnaC01g07580D	-4.5397	1.03364e-19	1.97701e-17	-3.9829	2.87507e-11	2.27851e-09	-4.14024	5.60098e-37	2.78724e-34	PF00450:Serine carboxypeptidase	Peptidase_S10
BnaA07g22720D	-3.0329	9.72156e-11	4.32083e-09	-2.7523	2.69226e-06	7.06049e-05	-2.70239	7.452e-07	1.36793e-05	PF00450:Serine carboxypeptidase	Peptidase_S10
BnaC03g36530D	-1.30546	0.000134919	0.00197142	-1.14042	0.00974949	0.0957666	-1.24265	9.43371e-05	0.00109603	PF00450:Serine carboxypeptidase	Peptidase_S10
BnaA04g20790D	-1.20943	0.001129	0.0131252	-0.878281	0.0324541	0.249655	-0.816244	4.07082e-05	0.000513759	PF00450:Serine carboxypeptidase	Peptidase_S10
BnaA01g06330D	1.30846	0.00140797	0.0158542	1.35705	0.0232492	0.192766	1.63893	1.28452e-16	1.04007e-14	PF00450:Serine carboxypeptidase	Peptidase_S10
BnaCnng22970D	7.66231	6.59367e-09	2.15851e-07	7.30498	7.70863e-08	2.90702e-06	8.55159	5.20246e-12	2.28533e-10	PF00450:Serine carboxypeptidase	Peptidase_S10
BnaA03g21460D	-3.41911	3.63584e-12	2.06996e-10	-2.31558	1.44068e-05	0.000322774	-2.92824	5.58766e-13	2.83863e-11	PF00454:Phosphatidylinositol 3- and 4-kinase	PI3_PI4_kinase
BnaA06g02600D	4.72819	0.000515657	0.0065666	5.75521	0.00026892	0.00436202	4.10803	0.000269024	0.00279162	PF00454:Phosphatidylinositol 3- and 4-kinase|PF00613:Phosphoinositide 3-kinase family, accessory domain (PIK domain)	PI3Ka
BnaA09g26600D	-1.22628	0.000612485	0.00764102	-1.15786	0.000132335	0.00232373	-0.776278	0.000749733	0.00689449	PF00458:WHEP-TRS domain|PF00587:tRNA synthetase class II core domain (G, H, P, S and T)|PF03129:Anticodon binding domain	HGTP_anticodon
BnaA08g16710D	-4.18851	7.79967e-10	2.99711e-08	-3.50446	1.51502e-07	5.34653e-06	-4.07161	6.25576e-13	3.14987e-11	PF00459:Inositol monophosphatase family	-
BnaA06g23130D	-1.83476	9.16566e-05	0.00139776	-1.79366	0.00177673	0.0226156	-2.34607	5.24627e-24	8.66028e-22	PF00459:Inositol monophosphatase family	-
BnaAnng00200D	-6.38893	6.64394e-06	0.000127578	-3.15022	0.0169829	0.149775	-4.5448	9.04001e-06	0.000132398	PF00462:Glutaredoxin	-
BnaA09g02360D	-2.91853	0.00356179	0.0354673	-1.97758	0.000966547	0.0134002	-1.01608	0.211687	0.570545	PF00462:Glutaredoxin	-
BnaA09g07960D	-1.66324	4.17899e-08	1.20216e-06	-1.12351	0.000301414	0.00483317	-1.47912	1.06608e-07	2.29283e-06	PF00462:Glutaredoxin	-
BnaA03g17670D	2.49781	2.2034e-07	5.58155e-06	2.49115	2.66699e-08	1.1014e-06	2.34731	4.00437e-16	3.08129e-14	PF00462:Glutaredoxin	-
BnaA04g11830D	3.50147	1.22749e-09	4.56228e-08	2.69756	0.00112203	0.0152241	3.11121	2.52914e-07	5.09235e-06	PF00462:Glutaredoxin	-
BnaA03g25620D	1.51272	2.457e-07	6.15978e-06	1.46214	0.000377407	0.0059016	1.18711	3.27383e-08	7.72841e-07	PF00462:Glutaredoxin|PF00085:Thioredoxin	-
BnaC01g01090D	-8.90551	1.93053e-11	9.84658e-10	-8.09733	3.31546e-11	2.57407e-09	-7.66079	1.43037e-12	6.89163e-11	PF00464:Serine hydroxymethyltransferase	SHMT
BnaC01g06000D	-7.87804	1.1051e-19	2.09021e-17	-4.71138	2.03958e-08	8.68276e-07	-5.16796	4.91534e-34	1.91491e-31	PF00464:Serine hydroxymethyltransferase	SHMT
BnaAnng08840D	0.910732	2.93053e-05	0.000496128	0.747911	0.000671532	0.00977563	0.738072	0.000207111	0.00222109	PF00464:Serine hydroxymethyltransferase	SHMT
BnaC03g38190D	-9.6335	1.82768e-14	1.5172e-12	-5.5604	1.30902e-09	7.11574e-08	-4.92772	0.00104238	0.00919939	PF00468:Ribosomal protein L34	-
BnaA08g18170D	-2.75823	4.52511e-10	1.81674e-08	-2.24511	3.41527e-09	1.7054e-07	-2.73728	3.47074e-11	1.33383e-09	PF00468:Ribosomal protein L34	-
BnaCnng48150D	1.42523	0.000701993	0.00862494	1.06353	0.0011087	0.0150819	1.11947	0.000280303	0.00289412	PF00472:RF-1 domain|PF03462:PCRF domain	-
BnaA01g04290D	2.3103	2.14658e-08	6.5164e-07	2.21924	1.48173e-06	4.1657e-05	2.58716	4.92505e-14	2.86493e-12	PF00476:DNA polymerase family A|PF00271:Helicase conserved C-terminal domain|PF00270:DEAD/DEAH box helicase	DEAD
BnaC01g06710D	-10.816	2.04186e-18	3.27907e-16	-4.65854	0.0458272	0.322952	-6.6722	2.23383e-05	0.000299084	PF00481:Protein phosphatase 2C	PP2C
BnaAnng02130D	-9.95292	6.8176e-16	7.42748e-14	-5.20567	9.22761e-08	3.40693e-06	-8.12001	1.68109e-14	1.04002e-12	PF00481:Protein phosphatase 2C	PP2C
BnaC05g43470D	-4.66034	0.00530684	0.0497245	-6.25814	6.77388e-05	0.00128786	-4.43199	0.00689606	0.0471088	PF00481:Protein phosphatase 2C	PP2C
BnaCnng05920D	-4.3225	6.87396e-34	6.59232e-31	-3.27235	4.49932e-08	1.77876e-06	-3.98043	7.48925e-36	3.52129e-33	PF00481:Protein phosphatase 2C	PP2C
BnaA10g04610D	-2.3376	2.19236e-07	5.55563e-06	-2.45797	0.00829054	0.0838573	-3.04941	1.56681e-11	6.38486e-10	PF00481:Protein phosphatase 2C	PP2C
BnaC06g39980D	-1.79188	1.37345e-05	0.000248987	-1.28	0.0864961	0.502379	-2.11625	2.57656e-10	8.67885e-09	PF00481:Protein phosphatase 2C	PP2C
BnaA04g28120D	-0.973606	0.000459686	0.00594614	-1.05842	0.00140862	0.0185414	-1.18345	1.73149e-08	4.28791e-07	PF00481:Protein phosphatase 2C	PP2C
BnaA01g30450D	-0.817849	0.00418654	0.0407158	-0.963333	0.00024282	0.00398	-0.94544	9.97501e-06	0.000144754	PF00481:Protein phosphatase 2C	PP2C
BnaA08g14490D	2.93427	1.76498e-09	6.37893e-08	2.42633	0.00429596	0.0482865	1.89577	0.000488878	0.00472428	PF00481:Protein phosphatase 2C	PP2C
BnaC06g06590D	7.17568	5.04504e-07	1.19694e-05	7.8436	6.06345e-08	2.33662e-06	5.03489	2.86231e-05	0.000374478	PF00481:Protein phosphatase 2C	PP2C
BnaA03g19260D	1.24578	0.000462976	0.00597991	1.58097	1.10242e-05	0.000253506	1.73882	7.16662e-08	1.5941e-06	PF00481:Protein phosphatase 2C|PF00069:Protein kinase domain	PP2C
BnaA04g11700D	-1.17007	2.241e-05	0.00038867	-0.692794	0.136403	0.667255	-0.86987	0.0020245	0.0164332	PF00483:Nucleotidyl transferase	-
BnaC07g42740D	-2.82415	1.42001e-05	0.000256473	-1.98243	0.000977282	0.0135381	-2.0418	0.0524793	0.235771	PF00483:Nucleotidyl transferase|PF00132:Bacterial transferase hexapeptide (six repeats)	Hexapep
BnaA01g03360D	1.62057	0.00502533	0.0475052	1.32588	0.010562	0.1023	1.7428	1.31955e-09	3.95782e-08	PF00484:Carbonic anhydrase	-
BnaC05g04360D	-1.98453	3.0613e-05	0.000516365	-1.38891	0.000212653	0.00353702	-1.20585	0.0404725	0.194136	PF00487:Fatty acid desaturase	-
BnaC05g43310D	-6.73351	2.18885e-06	4.6043e-05	-7.17021	1.65642e-07	5.79789e-06	-2.94848	0.000372206	0.00370933	PF00493:MCM2/3/5 family|PF14551:MCM N-terminal domain	MCM
BnaC01g03780D	-10.2859	9.96984e-17	1.22759e-14	-5.90628	4.20763e-18	1.20965e-15	-6.02155	0.000548886	0.00524395	PF00494:Squalene/phytoene synthase	-
BnaC01g03770D	-3.55677	3.32543e-07	8.17149e-06	-3.38522	0.00338142	0.0392661	-3.62742	4.1683e-41	2.70646e-38	PF00494:Squalene/phytoene synthase	-
BnaC05g44780D	-6.17743	2.16347e-24	7.71272e-22	-7.43975	6.80543e-19	2.25894e-16	-5.77546	4.09621e-31	1.20372e-28	PF00498:FHA domain	FHA
BnaA01g33000D	2.59738	0.00239579	0.0250972	2.35229	0.0255729	0.207648	2.09402	0.0101362	0.0649624	PF00498:FHA domain	FHA
BnaA05g33420D	2.74623	8.13783e-06	0.000153835	2.59738	0.000922246	0.0128456	3.35086	7.38408e-10	2.30502e-08	PF00498:FHA domain	FHA
BnaC09g07550D	7.64198	1.94523e-09	6.96751e-08	5.97373	7.4025e-09	3.41589e-07	5.71511	3.38972e-12	1.53349e-10	PF00498:FHA domain|PF01494:FAD binding domain	FHA
BnaC03g34500D	-3.14031	2.96966e-30	1.83825e-27	-3.49596	7.37093e-27	8.30257e-24	-2.93068	9.35976e-15	5.94144e-13	PF00501:AMP-binding enzyme	AMP-binding
BnaA03g29320D	-1.30094	0.000114024	0.00169476	-1.45459	0.000136092	0.002383	-1.35914	7.63903e-06	0.000114085	PF00501:AMP-binding enzyme	AMP-binding
BnaC03g56590D	6.26906	1.78319e-11	9.14989e-10	6.49132	6.83023e-12	6.19953e-10	8.48293	1.19682e-11	4.98439e-10	PF00501:AMP-binding enzyme	AMP-binding
BnaC05g30940D	8.03908	1.81584e-08	5.55697e-07	6.57733	6.19939e-06	0.000149617	7.46028	8.07839e-09	2.124e-07	PF00501:AMP-binding enzyme	AMP-binding
BnaA01g28170D	-3.82632	1.30942e-17	1.86526e-15	-2.79938	3.59068e-07	1.16024e-05	-2.81663	4.9066e-15	3.2414e-13	PF00501:AMP-binding enzyme|PF13193:AMP-binding enzyme C-terminal domain	AMP-binding
BnaA06g10520D	-5.96865	8.4523e-06	0.000159249	-1.47642	0.235776	0.879852	-4.69617	0.00161559	0.0134932	PF00504:Chlorophyll A-B binding protein	-
BnaA08g23760D	-4.30838	4.52836e-06	8.96861e-05	-2.1853	0.0036148	0.0416523	-3.55655	1.02598e-12	5.03944e-11	PF00504:Chlorophyll A-B binding protein	-
BnaA04g20150D	-2.54729	9.59514e-06	0.0001789	-2.09814	0.00656458	0.068905	-2.0108	0.0029638	0.0228523	PF00504:Chlorophyll A-B binding protein	-
BnaC01g03040D	-7.71985	4.99316e-38	6.41489e-35	-5.55549	1.35612e-11	1.14899e-09	-6.07978	1.92277e-07	3.93182e-06	PF00505:HMG (high mobility group) box	HMG_box
BnaA09g09180D	-2.65132	0.00200773	0.0216139	-3.1806	3.5489e-05	0.000722289	-2.16689	6.58588e-05	0.000791187	PF00505:HMG (high mobility group) box	HMG_box
BnaA09g22120D	-1.86503	2.81624e-05	0.000478802	-1.52585	0.0253942	0.206514	-1.27166	0.000280126	0.00289274	PF00505:HMG (high mobility group) box	HMG_box
BnaA01g01900D	1.10678	2.99168e-06	6.12827e-05	1.0964	0.00134374	0.0178136	1.20302	1.01657e-08	2.6282e-07	PF00505:HMG (high mobility group) box	HMG_box
BnaA08g28100D	4.45592	7.41508e-09	2.41118e-07	3.57692	9.91711e-06	0.000230127	3.91692	1.89085e-15	1.32761e-13	PF00505:HMG (high mobility group) box|PF01388:ARID/BRIGHT DNA binding domain	ARID
BnaCnng61310D	-4.89865	1.17345e-08	3.70427e-07	-2.93816	8.212e-05	0.00152623	-5.38567	1.78537e-10	6.16926e-09	PF00514:Armadillo/beta-catenin-like repeat	Arm
BnaAnng00600D	1.42893	0.00182403	0.019907	1.25986	0.0217028	0.182009	1.15383	0.000303311	0.00309884	PF00514:Armadillo/beta-catenin-like repeat	Arm
BnaCnng05650D	1.91942	1.96553e-05	0.000345647	1.32896	0.0312281	0.242231	1.7723	1.30084e-05	0.000183882	PF00514:Armadillo/beta-catenin-like repeat	Arm
BnaA10g07330D	7.5616	2.89704e-07	7.17578e-06	7.25221	7.79934e-07	2.34627e-05	7.13864	2.91043e-07	5.80011e-06	PF00520:Ion transport protein	Ion_trans
BnaA01g06670D	1.3623	0.00367729	0.0364735	1.51769	0.000245884	0.00402064	1.98478	4.03664e-12	1.80224e-10	PF00520:Ion transport protein|PF00027:Cyclic nucleotide-binding domain	Ion_trans
BnaA01g04350D	2.27934	5.31003e-05	0.000853352	1.89411	0.0354108	0.265513	2.3817	3.30216e-11	1.27191e-09	PF00520:Ion transport protein|PF11834:KHA, dimerisation domain of potassium ion channel|PF00027:Cyclic nucleotide-binding domain	Ion_trans
BnaCnng23260D	6.10838	5.91725e-06	0.000114822	3.40772	0.0153793	0.138379	3.50249	0.000180743	0.00196661	PF00534:Glycosyl transferases group 1|PF00862:Sucrose synthase	Glycos_transf_1
BnaA05g34510D	1.48367	0.000127548	0.00187254	1.53024	8.50283e-06	0.00020001	1.46737	9.49954e-07	1.70611e-05	PF00534:Glycosyl transferases group 1|PF15924:ALG11 mannosyltransferase N-terminus	Glycos_transf_1
BnaA06g14480D	-6.73728	3.97018e-06	7.93931e-05	-5.66692	0.000110764	0.00198918	-4.6933	0.000155032	0.00171723	PF00535:Glycosyl transferase family 2	Glycos_transf_2
BnaCnng09250D	-6.80512	1.70836e-20	3.71643e-18	-4.57722	5.02173e-12	4.7137e-10	-4.58266	1.29672e-28	3.18005e-26	PF00536:SAM domain (Sterile alpha motif)	SAM_1
BnaA04g25150D	3.58077	0.00171897	0.0188967	3.61035	0.00578641	0.0620063	4.29936	1.51784e-05	0.000211184	PF00537:Scorpion toxin-like domain	-
BnaA04g25170D	3.86201	0.00015961	0.00229331	1.02679	0.528266	0.999967	2.62712	0.0602815	0.259111	PF00537:Scorpion toxin-like domain	-
BnaC04g53000D	8.07154	5.43934e-09	1.80933e-07	6.67302	1.27687e-05	0.000289482	7.64452	2.3512e-09	6.76513e-08	PF00537:Scorpion toxin-like domain	-
BnaC03g17040D	-3.32806	3.78916e-11	1.80299e-09	-2.52626	0.00071137	0.0102631	-3.65862	8.13792e-47	9.2291e-44	PF00538:linker histone H1 and H5 family	-
BnaA09g09460D	-2.79633	1.29635e-21	3.29365e-19	-2.37069	5.45054e-05	0.00105703	-1.84704	2.41323e-09	6.92545e-08	PF00538:linker histone H1 and H5 family	-
BnaA10g04420D	-1.91465	2.10449e-06	4.4378e-05	-1.47393	0.00266253	0.0320595	-2.1153	6.43632e-22	8.95516e-20	PF00538:linker histone H1 and H5 family	-
BnaA04g17710D	1.76302	0.000249762	0.00344471	1.99231	0.00014537	0.00252487	1.62827	1.00965e-17	9.28932e-16	PF00538:linker histone H1 and H5 family	-
BnaC05g45780D	-9.54062	3.14997e-14	2.50566e-12	-7.7773	2.0408e-12	2.05607e-10	-9.84642	5.15901e-16	3.91235e-14	PF00542:Ribosomal protein L7/L12 C-terminal domain	-
BnaC01g01350D	-8.71894	1.99479e-11	1.01439e-09	-6.26013	7.31183e-10	4.22725e-08	-7.74641	4.13075e-10	1.34617e-08	PF00542:Ribosomal protein L7/L12 C-terminal domain	-
BnaA05g31240D	1.14601	0.00501307	0.0474152	1.07604	0.00537452	0.058164	0.961665	0.000519867	0.004994	PF00542:Ribosomal protein L7/L12 C-terminal domain	-
BnaC05g43400D	-9.52315	1.4304e-12	8.71172e-11	-6.12755	6.82203e-14	9.52727e-12	-7.47601	4.09666e-12	1.82784e-10	PF00544:Pectate lyase	-
BnaA07g16000D	-6.32107	0.000108979	0.00162737	-3.91795	0.00480546	0.0529873	-3.18139	0.0154223	0.0913335	PF00544:Pectate lyase	-
BnaC05g44980D	-2.8832	1.62e-10	6.95945e-09	-2.8364	4.84865e-06	0.000119389	-2.83545	1.98265e-29	5.04363e-27	PF00544:Pectate lyase	-
BnaA03g08040D	3.40522	1.37662e-05	0.00024946	3.74691	1.39559e-10	9.40107e-09	4.00181	5.35042e-12	2.34127e-10	PF00544:Pectate lyase|PF03016:Exostosin family	-
BnaC02g39080D	9.22278	3.34838e-13	2.2754e-11	7.1022	4.11096e-11	3.13546e-09	7.59508	2.56752e-12	1.18352e-10	PF00549:CoA-ligase|PF00285:Citrate synthase	Citrate_synt
BnaC04g29960D	3.79	2.48712e-11	1.23523e-09	4.67296	6.97257e-11	5.06968e-09	3.2527	3.61535e-10	1.18957e-08	PF00550:Phosphopantetheine attachment site	PP-binding
BnaC06g27510D	2.13589	0.000193771	0.00272886	1.78258	0.000474651	0.00721214	1.62431	3.4581e-05	0.000443741	PF00551:Formyl transferase|PF02911:Formyl transferase, C-terminal domain	-
BnaA07g18610D	-3.32501	1.01595e-17	1.46252e-15	-3.01371	7.12483e-11	5.17491e-09	-3.17391	4.78236e-22	6.70869e-20	PF00557:Metallopeptidase family M24	Peptidase_M24
BnaC01g04990D	-8.80016	2.19471e-12	1.2938e-10	-5.66862	2.29444e-11	1.86129e-09	-8.80337	1.05525e-12	5.17202e-11	PF00561:alpha/beta hydrolase fold	Abhydrolase_1
BnaC01g02170D	-7.20194	1.98301e-10	8.38146e-09	-5.51369	9.26941e-11	6.56599e-09	-5.18233	6.36815e-15	4.13875e-13	PF00561:alpha/beta hydrolase fold	Abhydrolase_1
BnaA01g32140D	-1.33974	0.0031727	0.0320285	-1.22554	0.00758542	0.0778657	-1.54511	1.22172e-06	2.15559e-05	PF00561:alpha/beta hydrolase fold	Abhydrolase_1
BnaA01g34540D	1.74433	1.77437e-05	0.000314142	1.13083	0.029631	0.232972	1.35914	1.33489e-10	4.68387e-09	PF00561:alpha/beta hydrolase fold	Abhydrolase_1
BnaC01g39060D	3.16934	2.01675e-06	4.27264e-05	3.44804	3.30551e-07	1.07641e-05	4.44036	6.05982e-12	2.62976e-10	PF00561:alpha/beta hydrolase fold	Abhydrolase_1
BnaA06g16720D	-1.3083	0.00261734	0.0271053	-0.708211	0.197861	0.813974	-1.35128	0.00218465	0.017572	PF00564:PB1 domain	-
BnaA04g20490D	-1.27395	1.52109e-05	0.000272631	-1.24028	1.45761e-06	4.10292e-05	-1.14797	1.22321e-08	3.11403e-07	PF00564:PB1 domain|PF07714:Protein tyrosine kinase	Pkinase_Tyr
BnaA01g04840D	3.83691	1.83567e-15	1.86279e-13	3.05359	1.36793e-13	1.80059e-11	3.48855	3.91407e-42	2.64204e-39	PF00564:PB1 domain|PF13414:TPR repeat	-
BnaC01g08420D	-2.57381	1.14213e-11	6.02856e-10	-1.94269	0.000656507	0.00958738	-2.51371	6.49468e-21	8.30734e-19	PF00566:Rab-GTPase-TBC domain	TBC
BnaC04g07980D	1.03089	0.000265125	0.00363076	1.02121	0.000673109	0.00979651	1.30909	1.83591e-05	0.000250932	PF00566:Rab-GTPase-TBC domain	TBC
BnaA01g07000D	1.56833	4.42964e-07	1.06017e-05	1.79102	7.48224e-05	0.00140812	1.45163	1.73062e-10	5.98919e-09	PF00566:Rab-GTPase-TBC domain	TBC
BnaA02g09450D	1.57114	0.000641359	0.00796331	1.67252	0.0019427	0.0244385	0.737528	0.132986	0.438586	PF00566:Rab-GTPase-TBC domain	TBC
BnaA10g02940D	2.96619	0.00104503	0.0122558	3.75021	0.00169513	0.021738	4.71673	4.65841e-06	7.30543e-05	PF00566:Rab-GTPase-TBC domain	TBC
BnaA05g29910D	-1.76617	6.39193e-08	1.78961e-06	-1.87443	1.01271e-08	4.54794e-07	-1.61556	4.79732e-09	1.31035e-07	PF00569:Zinc finger, ZZ type|PF00249:Myb-like DNA-binding domain	Myb_DNA-binding
BnaA10g21510D	-0.935976	0.000138751	0.00201874	-0.842874	0.128382	0.643359	-0.63632	0.0195855	0.1107	PF00571:CBS domain	CBS
BnaC04g08800D	7.76881	2.46552e-07	6.17844e-06	6.78139	4.38151e-07	1.38862e-05	6.44969	3.91035e-06	6.22587e-05	PF00571:CBS domain|PF00564:PB1 domain	CBS
BnaC01g03130D	-6.18938	3.48442e-05	0.000580945	-3.47648	0.00633667	0.0669217	-5.24457	0.000249442	0.00261273	PF00571:CBS domain|PF00654:Voltage gated chloride channel	Voltage_CLC
BnaA03g27290D	-9.42251	1.3322e-13	9.6092e-12	-6.06609	2.24528e-13	2.84637e-11	-8.76865	5.09441e-13	2.60162e-11	PF00572:Ribosomal protein L13	-
BnaC05g43330D	-5.46641	9.98823e-51	3.67165e-47	-5.07227	6.57013e-26	6.68788e-23	-5.26686	4.94797e-41	3.18238e-38	PF00573:Ribosomal protein L4/L1 family|PF14374:60S ribosomal protein L4 C-terminal domain	-
BnaC07g34090D	-3.69644	3.71205e-09	1.26759e-07	-1.92245	0.00922804	0.0914085	-3.08032	6.5192e-15	4.22519e-13	PF00574:Clp protease	-
BnaC05g09420D	1.47813	0.000172905	0.00246067	1.44636	0.000492935	0.0074504	1.77307	2.30917e-09	6.66511e-08	PF00574:Clp protease	-
BnaCnng74080D	4.79298	0.00186173	0.0202309	1.58827	0.181011	0.780386	4.62394	1.79925e-05	0.000246218	PF00574:Clp protease	-
BnaC07g34050D	9.69946	9.98457e-15	8.88705e-13	7.55031	1.69395e-15	3.13724e-13	6.87215	6.02962e-21	7.72698e-19	PF00574:Clp protease	-
BnaA06g07940D	1.49115	4.94339e-05	0.000800067	1.47234	0.00412255	0.0466555	1.10598	0.0004209	0.00414252	PF00575:S1 RNA binding domain	S1
BnaA04g15180D	-3.23021	3.02043e-05	0.00051008	-1.85119	0.00337605	0.039217	-2.41517	0.000215252	0.00229908	PF00579:tRNA synthetases class I (W and Y)	-
BnaC01g02910D	-6.35164	0.000304207	0.00410743	-3.18425	0.00936565	0.0925652	-5.54407	8.83031e-08	1.92337e-06	PF00581:Rhodanese-like domain	Rhodanese
BnaA03g00900D	-2.37604	0.000108555	0.00162239	-2.17777	0.000343676	0.00542725	-2.28561	1.56953e-13	8.51945e-12	PF00581:Rhodanese-like domain	Rhodanese
BnaC06g39640D	1.09905	0.00155038	0.0172749	0.964944	0.0255583	0.207553	0.937305	0.00182259	0.0149888	PF00581:Rhodanese-like domain	Rhodanese
BnaC05g47950D	-5.14807	6.62857e-39	9.6031e-36	-4.77672	1.65657e-34	5.17376e-31	-4.96503	1.3839e-68	9.43485e-65	PF00582:Universal stress protein family	Usp
BnaAnng24100D	-3.37968	1.7479e-07	4.50308e-06	-1.19804	0.177446	0.772299	-1.40761	0.0809194	0.318501	PF00582:Universal stress protein family	Usp
BnaA05g00280D	-3.25588	1.49812e-15	1.54793e-13	-3.32258	6.45549e-13	7.18892e-11	-2.37709	4.05565e-08	9.44001e-07	PF00582:Universal stress protein family	Usp
BnaA06g33220D	-2.72996	0.000169279	0.00241643	-3.36518	0.000377794	0.00590631	-2.69847	1.17534e-08	3.00337e-07	PF00582:Universal stress protein family	Usp
BnaA09g08850D	-2.44032	0.00160793	0.0178403	-1.8045	0.0218089	0.182787	-0.85173	0.283168	0.662622	PF00582:Universal stress protein family	Usp
BnaA10g19150D	1.81207	4.69084e-05	0.000761029	1.75311	1.47949e-05	0.000330804	0.894486	0.0145205	0.0872048	PF00582:Universal stress protein family	Usp
BnaC04g00160D	2.34924	2.72322e-06	5.63436e-05	1.84418	0.000239919	0.00393809	2.78917	9.0336e-10	2.78299e-08	PF00582:Universal stress protein family	Usp
BnaA08g02910D	2.43819	2.84134e-06	5.85739e-05	3.09979	2.43028e-10	1.57384e-08	2.31796	1.07575e-05	0.00015489	PF00582:Universal stress protein family	Usp
BnaA02g00970D	6.59129	3.32995e-09	1.14689e-07	4.171	2.49211e-10	1.60933e-08	4.25985	1.10326e-12	5.39955e-11	PF00583:Acetyltransferase (GNAT) family	Acetyltransf_1
BnaC07g39190D	2.89299	3.54818e-13	2.40637e-11	2.51719	5.33879e-09	2.55191e-07	2.94545	1.39437e-30	3.94451e-28	PF00584:SecE/Sec61-gamma subunits of protein translocation complex	-
BnaC01g38880D	6.28521	2.08158e-30	1.33714e-27	5.33088	2.5793e-26	2.81308e-23	5.89808	5.20163e-57	1.47761e-53	PF00585:C-terminal regulatory domain of Threonine dehydratase|PF00291:Pyridoxal-phosphate dependent enzyme	PALP
BnaC01g01030D	-5.82597	0.000104644	0.00157187	-5.4874	0.000587381	0.00868495	-6.22477	1.06913e-05	0.000154034	PF00588:SpoU rRNA Methylase family	SpoU_methylase
BnaA10g18760D	2.44063	8.67625e-07	1.97451e-05	2.08255	5.05011e-06	0.000124103	1.95229	3.23865e-07	6.3981e-06	PF00588:SpoU rRNA Methylase family	SpoU_methylase
BnaC01g06690D	-7.30955	6.84262e-08	1.90483e-06	-6.13452	6.16879e-06	0.000148983	-7.60559	4.29501e-09	1.17739e-07	PF00590:Tetrapyrrole (Corrin/Porphyrin) Methylases	-
BnaC01g08060D	-7.26531	4.89573e-08	1.39538e-06	-4.96636	3.06392e-05	0.000633911	-7.88754	8.03123e-10	2.49447e-08	PF00609:Diacylglycerol kinase accessory domain|PF00781:Diacylglycerol kinase catalytic domain	-
BnaA03g01970D	-0.936321	0.00246227	0.0257105	-0.956757	0.0150352	0.135894	-0.992717	0.000296639	0.00303887	PF00612:IQ calmodulin-binding motif|PF13178:Protein of unknown function (DUF4005)	IQ
BnaAnng26590D	-1.41887	6.40838e-06	0.000123578	-1.39833	0.000101992	0.00184904	-1.78147	2.27763e-10	7.76787e-09	PF00620:RhoGAP domain	RhoGAP
BnaC05g45590D	-7.61985	2.22567e-21	5.37405e-19	-6.68139	3.65693e-18	1.05575e-15	-6.3496	2.08602e-29	5.28687e-27	PF00625:Guanylate kinase	-
BnaC03g23480D	2.26383	8.99915e-08	2.45667e-06	2.02321	1.20683e-06	3.46516e-05	2.42312	4.80308e-25	8.66282e-23	PF00626:Gelsolin repeat|PF02209:Villin headpiece domain	-
BnaC06g12200D	4.0049	1.43398e-05	0.000258652	3.71538	0.00185722	0.0234842	3.55237	0.000352759	0.0035388	PF00626:Gelsolin repeat|PF02209:Villin headpiece domain	-
BnaC05g44870D	-2.65274	1.19459e-20	2.64094e-18	-2.53908	1.06306e-20	4.86952e-18	-2.15813	1.6085e-25	3.02097e-23	PF00626:Gelsolin repeat|PF04815:Sec23/Sec24 helical domain|PF08033:Sec23/Sec24 beta-sandwich domain|PF04810:Sec23/Sec24 zinc finger|PF04811:Sec23/Sec24 trunk domain	-
BnaC03g07910D	2.34789	0.000147855	0.00214043	1.93794	0.0454992	0.320991	2.4312	0.00402898	0.0297401	PF00628:PHD-finger	PHD
BnaC06g21100D	2.46462	1.10067e-07	2.95761e-06	1.79699	0.000230834	0.0038026	2.85702	8.79966e-14	4.95806e-12	PF00628:PHD-finger	PHD
BnaC07g37120D	-1.44049	0.00012358	0.00181899	-0.819835	0.0117771	0.11185	-1.41559	9.11188e-06	0.000133336	PF00628:PHD-finger|PF01426:BAH domain	BAH
BnaA09g10980D	-1.86996	0.000152457	0.00219842	-1.79473	1.88292e-05	0.000410715	-1.28793	4.29368e-05	0.000537802	PF00628:PHD-finger|PF02375:jmjN domain|PF02373:JmjC domain, hydroxylase|PF02928:C5HC2 zinc finger|PF08429:PLU-1-like protein|PF01388:ARID/BRIGHT DNA binding domain	JmjC
BnaC03g05570D	1.00789	0.000236672	0.00327945	0.860843	0.057322	0.378748	0.897759	0.00115981	0.0101037	PF00628:PHD-finger|PF02791:DDT domain	DDT
BnaA09g19080D	-1.20194	0.00012055	0.00178055	-1.01544	0.0173054	0.151878	-0.784274	4.25946e-05	0.000534203	PF00628:PHD-finger|PF12165:Domain of unknown function (DUF3594)	PHD
BnaA08g23940D	-1.18642	8.57981e-05	0.00131697	-1.01034	0.00299255	0.0354086	-0.808965	0.000636115	0.00595874	PF00628:PHD-finger|PF12165:Domain of unknown function (DUF3594)	PHD
BnaA10g14970D	2.90169	8.44648e-05	0.00129767	3.42559	3.07683e-06	7.96269e-05	3.19712	8.16963e-08	1.79379e-06	PF00628:PHD-finger|PF12165:Domain of unknown function (DUF3594)	PHD
BnaC05g46120D	-7.09864	5.47455e-18	8.19269e-16	-5.80464	6.33448e-19	2.12313e-16	-6.71072	4.15798e-21	5.38924e-19	PF00628:PHD-finger|PF13639:Ring finger domain	PHD
BnaA04g21480D	-0.975177	0.000111466	0.00166152	-0.844413	0.00691146	0.0720945	-0.616823	0.047104	0.217476	PF00628:PHD-finger|PF16135:TPL-binding domain in jasmonate signalling	PHD
BnaAnng00510D	11.3104	4.94046e-20	9.93127e-18	7.79338	4.78503e-24	3.81359e-21	6.14058	0.00185864	0.0152503	PF00632:HECT-domain (ubiquitin-transferase)	HECT
BnaC04g22100D	-1.56196	1.34196e-08	4.2031e-07	-1.31197	2.86753e-07	9.48162e-06	-1.47617	1.27755e-12	6.19475e-11	PF00635:MSP (Major sperm protein) domain	Motile_Sperm
BnaA03g27170D	-1.28786	0.000541904	0.00687128	-1.52284	0.000173463	0.00294797	-1.91156	2.64328e-07	5.31274e-06	PF00635:MSP (Major sperm protein) domain	Motile_Sperm
BnaC01g01410D	-8.86408	2.30856e-12	1.35394e-10	-6.93294	9.01012e-10	5.08698e-08	-6.29584	3.97108e-12	1.77646e-10	PF00636:Ribonuclease III domain	Ribonuclease_3
BnaC01g39430D	-6.43629	9.41693e-06	0.00017577	-5.21219	0.000223964	0.00369829	-6.6104	3.31695e-06	5.37014e-05	PF00637:Region in Clathrin and VPS	-
BnaA01g31010D	1.33037	8.3804e-09	2.70826e-07	1.11502	0.000187294	0.00315571	1.32758	7.46472e-09	1.97407e-07	PF00637:Region in Clathrin and VPS	-
BnaA03g30360D	-0.961958	0.00100825	0.0118797	-1.17505	1.37749e-06	3.90943e-05	-0.753446	0.00013345	0.00150009	PF00637:Region in Clathrin and VPS|PF01394:Clathrin propeller repeat|PF13838:Clathrin-H-link|PF09268:Clathrin, heavy-chain linker	-
BnaA10g04580D	1.99951	1.28124e-09	4.74393e-08	1.67004	1.80736e-06	4.95545e-05	1.86981	7.06046e-17	5.87017e-15	PF00638:RanBP1 domain	-
BnaC03g57440D	10.3503	3.41077e-17	4.51833e-15	6.91887	3.41466e-17	8.43962e-15	7.43829	6.38401e-22	8.90053e-20	PF00639:PPIC-type PPIASE domain	-
BnaA06g03700D	-2.0101	3.14092e-05	0.000527939	-1.76035	7.42582e-05	0.00139942	-1.8166	2.78315e-09	7.9027e-08	PF00641:Zn-finger in Ran binding protein and others	zf-RanBP
BnaA03g29420D	-1.75642	2.39246e-05	0.000412105	-1.60547	0.000130479	0.0022976	-1.76635	4.53529e-07	8.72208e-06	PF00642:Zinc finger C-x8-C-x5-C-x3-H type (and similar)	zf-CCCH
BnaC03g33170D	-1.30769	0.000399882	0.00524834	-1.4622	0.0362171	0.269906	-1.24795	0.021784	0.120323	PF00642:Zinc finger C-x8-C-x5-C-x3-H type (and similar)	zf-CCCH
BnaA03g35240D	1.16007	0.00416483	0.0405414	0.776572	0.196095	0.810838	1.01088	0.00211681	0.0170747	PF00642:Zinc finger C-x8-C-x5-C-x3-H type (and similar)	zf-CCCH
BnaA02g35100D	3.87225	1.09674e-05	0.000202105	3.65879	0.00202911	0.0253767	3.20064	1.30637e-06	2.29071e-05	PF00642:Zinc finger C-x8-C-x5-C-x3-H type (and similar)	zf-CCCH
BnaC05g38630D	-3.47697	9.95088e-16	1.05704e-13	-3.9385	2.12142e-15	3.84598e-13	-3.23771	3.69924e-18	3.57729e-16	PF00645:Poly(ADP-ribose) polymerase and DNA-Ligase Zn-finger region|PF08645:Polynucleotide kinase 3 phosphatase	-
BnaA05g24640D	1.01452	0.00514375	0.0484229	1.4601	0.000292988	0.00471356	1.05496	0.000653629	0.00610516	PF00645:Poly(ADP-ribose) polymerase and DNA-Ligase Zn-finger region|PF08645:Polynucleotide kinase 3 phosphatase	-
BnaC01g05020D	-8.28894	1.29255e-09	4.78061e-08	-6.37149	5.1144e-08	2.00006e-06	-7.69277	8.24644e-10	2.5555e-08	PF00646:F-box domain	F-box
BnaA03g34730D	-7.63365	8.41585e-08	2.31159e-06	-6.50371	1.29879e-06	3.70135e-05	-8.20569	1.61284e-10	5.60147e-09	PF00646:F-box domain	F-box
BnaC05g47230D	-3.77632	0.00140705	0.0158491	-3.76626	2.15153e-05	0.000464004	-2.77622	0.00104711	0.00923634	PF00646:F-box domain	F-box
BnaA07g22770D	-3.74936	7.17206e-06	0.000136947	-1.89316	0.0482029	0.334886	-1.52045	0.0368296	0.180822	PF00646:F-box domain	F-box
BnaA05g29450D	-2.18328	1.11737e-08	3.53875e-07	-2.06	1.31222e-05	0.000296784	-1.61164	9.39731e-07	1.69042e-05	PF00646:F-box domain	F-box
BnaC06g21190D	-1.95047	0.00303763	0.0308663	-1.90544	0.0332356	0.254006	-0.959513	0.0101361	0.0649624	PF00646:F-box domain	F-box
BnaA09g07490D	-1.47332	1.56301e-05	0.000279776	-0.899344	0.0284595	0.225802	-1.61874	2.74432e-11	1.07035e-09	PF00646:F-box domain	F-box
BnaA01g03670D	1.74342	0.000107957	0.00161523	1.28728	0.140308	0.67815	1.01085	0.00245356	0.0193851	PF00646:F-box domain	F-box
BnaA05g02030D	1.89861	0.000136492	0.00199012	1.39617	0.0546243	0.365955	2.01982	0.00199003	0.0162055	PF00646:F-box domain	F-box
BnaC03g72970D	5.22657	0.00222857	0.0235886	5.03883	0.00415509	0.0469721	5.07423	0.00378956	0.0282361	PF00646:F-box domain	F-box
BnaC02g35180D	7.01246	1.8056e-06	3.86134e-05	6.57517	7.09348e-06	0.000169469	6.85298	4.0612e-07	7.87029e-06	PF00646:F-box domain	F-box
BnaC09g07370D	7.76543	2.33708e-34	2.37514e-31	7.28162	5.2916e-20	2.1514e-17	7.11152	5.0825e-06	7.90564e-05	PF00646:F-box domain	F-box
BnaC05g45450D	-7.70177	5.55459e-12	3.07744e-10	-5.71522	1.23464e-09	6.75415e-08	-8.32601	1.44646e-11	5.93343e-10	PF00646:F-box domain|PF01167:Tub family	Tub
BnaA08g19290D	-1.14198	4.52926e-05	0.000737979	-0.842574	0.0314757	0.243821	-1.0868	0.000106814	0.00122678	PF00646:F-box domain|PF01167:Tub family	Tub
BnaA09g04010D	1.36921	0.000284958	0.00387364	1.66933	0.000675935	0.00983139	0.740372	0.00457708	0.0332212	PF00646:F-box domain|PF01344:Kelch motif	Kelch_1
BnaA10g16910D	-1.12886	0.00473858	0.0452151	-1.03333	0.0222058	0.185642	-1.24034	0.000614266	0.0057795	PF00646:F-box domain|PF06991:Microfibril-associated/Pre-mRNA processing|PF07734:F-box associated	F-box
BnaC03g73940D	-5.57307	0.000461762	0.00596846	-5.3146	0.0013804	0.0182399	-5.27202	0.00126412	0.010905	PF00646:F-box domain|PF07734:F-box associated	F-box
BnaC03g34600D	2.89981	1.09471e-12	6.78869e-11	2.56808	4.63637e-07	1.4593e-05	1.9923	3.14224e-06	5.11767e-05	PF00646:F-box domain|PF07734:F-box associated	F-box
BnaC07g20270D	-2.23148	0.000179148	0.00254132	-2.06783	NA	1	-2.22619	4.7108e-06	7.37967e-05	PF00650:CRAL/TRIO domain	-
BnaA06g00190D	-1.6672	0.000405602	0.00531725	-1.11192	0.00244508	0.0297981	-1.25723	5.57381e-05	0.000679907	PF00650:CRAL/TRIO domain	-
BnaC05g17570D	3.40896	1.11985e-05	0.000205807	4.17943	0.00220323	0.0272273	3.69397	0.000126633	0.00143031	PF00650:CRAL/TRIO domain	-
BnaC05g45580D	-9.59307	7.54595e-15	6.85082e-13	-6.05541	1.19443e-17	3.16869e-15	-6.2091	0.000726213	0.00669873	PF00651:BTB/POZ domain	BTB
BnaC03g09550D	6.53085	1.63253e-05	0.000291186	6.34669	1.81139e-05	0.000396751	6.58998	3.52777e-06	5.67506e-05	PF00651:BTB/POZ domain	BTB
BnaC01g06630D	-11.2833	1.29398e-19	2.41393e-17	-4.88	4.98866e-05	0.000977391	-7.15382	4.26485e-05	0.000534486	PF00651:BTB/POZ domain|PF03000:NPH3 family	BTB
BnaA09g08440D	1.32334	0.00412999	0.0402714	1.30176	0.00898518	0.0895651	0.879788	0.00449124	0.0326887	PF00651:BTB/POZ domain|PF03000:NPH3 family	BTB
BnaA08g07280D	-1.98034	3.23683e-08	9.49997e-07	-0.907999	0.08989	0.514355	-1.27814	4.38943e-07	8.45589e-06	PF00654:Voltage gated chloride channel	Voltage_CLC
BnaA07g15180D	2.43773	0.000603553	0.00754401	2.203	0.00213755	0.0264919	2.00901	4.03394e-08	9.39268e-07	PF00654:Voltage gated chloride channel	Voltage_CLC
BnaC01g37130D	-1.87703	1.00008e-05	0.000185701	-2.27157	4.04204e-05	0.000808762	-1.24528	4.15514e-05	0.000522369	PF00657:GDSL-like Lipase/Acylhydrolase	Lipase_GDSL
BnaC02g13410D	1.25874	0.0033732	0.033817	0.806094	0.168946	0.752951	1.04985	0.000772134	0.00708016	PF00657:GDSL-like Lipase/Acylhydrolase	Lipase_GDSL
BnaC03g59270D	2.53981	0.000226194	0.00314965	1.76668	0.00103214	0.0141745	1.42881	0.000152468	0.00169156	PF00657:GDSL-like Lipase/Acylhydrolase	Lipase_GDSL
BnaA08g17830D	2.76155	0.00407989	0.039873	1.63128	0.0240612	0.198112	1.80459	0.012889	0.0790216	PF00657:GDSL-like Lipase/Acylhydrolase	Lipase_GDSL
BnaA02g09320D	3.30218	8.97535e-11	4.01802e-09	2.71923	2.71849e-08	1.11983e-06	3.40078	3.68757e-28	8.58033e-26	PF00657:GDSL-like Lipase/Acylhydrolase	Lipase_GDSL
BnaA06g00620D	3.79915	6.56602e-06	0.000126189	2.72536	0.0104891	0.101752	3.26297	0.00373636	0.0278851	PF00657:GDSL-like Lipase/Acylhydrolase	Lipase_GDSL
BnaC03g58810D	4.91918	0.00465656	0.0445198	2.91399	0.0247058	0.202328	3.01535	0.0260473	0.138803	PF00657:GDSL-like Lipase/Acylhydrolase	Lipase_GDSL
BnaA04g15580D	6.2431	6.97617e-06	0.000133544	3.90064	0.000337994	0.00534982	8.24744	4.23404e-11	1.60634e-09	PF00657:GDSL-like Lipase/Acylhydrolase	Lipase_GDSL
BnaC01g04280D	-9.93649	6.07597e-29	3.30975e-26	-5.23522	6.86354e-10	3.99656e-08	-6.83003	0.00149686	0.0126299	PF00658:Poly-adenylate binding protein, unique domain|PF00076:RNA recognition motif. (a.k.a. RRM, RBD, or RNP domain)	RRM_1
BnaC04g35810D	-0.896509	0.000650628	0.00806956	-0.795892	0.020261	0.172379	-0.677271	0.000865717	0.00781426	PF00658:Poly-adenylate binding protein, unique domain|PF00076:RNA recognition motif. (a.k.a. RRM, RBD, or RNP domain)	RRM_1
BnaCnng67910D	-1.94855	0.000374795	0.00494481	-1.71806	0.0027857	0.0332995	-2.13599	3.66572e-05	0.000467268	PF00667:FAD binding domain|PF00175:Oxidoreductase NAD-binding domain|PF00258:Flavodoxin	NAD_binding_1
BnaA01g06800D	2.18847	2.28094e-09	8.04308e-08	2.19745	0.000362093	0.00569323	2.10223	6.24281e-13	3.14568e-11	PF00667:FAD binding domain|PF00258:Flavodoxin|PF00175:Oxidoreductase NAD-binding domain	NAD_binding_1
BnaA01g33220D	1.73424	2.49396e-13	1.71879e-11	1.44039	5.35052e-08	2.08393e-06	1.54284	1.23196e-13	6.76248e-12	PF00675:Insulinase (Peptidase family M16)|PF05193:Peptidase M16 inactive domain	-
BnaCnng28170D	8.20875	2.60698e-08	7.75498e-07	6.16359	4.22149e-06	0.000105514	7.84307	2.74697e-09	7.80647e-08	PF00676:Dehydrogenase E1 component	-
BnaA07g37870D	-1.34828	3.67313e-07	8.94197e-06	-1.36911	6.9535e-06	0.000166588	-1.34865	9.86818e-13	4.85757e-11	PF00676:Dehydrogenase E1 component|PF02779:Transketolase, pyrimidine binding domain|PF16870:2-oxoglutarate dehydrogenase C-terminal	-
BnaAnng34020D	-3.04104	1.31383e-19	2.44426e-17	-3.07404	2.70511e-10	1.73384e-08	-3.42165	1.99486e-37	1.03032e-34	PF00679:Elongation factor G C-terminus	-
BnaC09g43450D	-1.1797	0.00141208	0.0158861	-0.906949	0.0161054	0.14377	-0.974061	0.00293824	0.0226783	PF00679:Elongation factor G C-terminus|PF00009:Elongation factor Tu GTP binding domain|PF03144:Elongation factor Tu domain 2	GTP_EFTU
BnaC08g22000D	-1.95226	0.000918915	0.0109618	-2.36276	0.000384592	0.00600439	-1.84508	0.000943605	0.00842252	PF00685:Sulfotransferase domain	Sulfotransfer_1
BnaC06g34970D	-1.49179	0.00410118	0.0400363	-1.10586	0.00642489	0.0676919	-1.04806	0.0129049	0.0790975	PF00685:Sulfotransferase domain	Sulfotransfer_1
BnaC06g35000D	2.06012	1.01052e-07	2.72721e-06	1.68562	4.58099e-05	0.000905783	2.41489	2.35078e-25	4.31986e-23	PF00685:Sulfotransferase domain	Sulfotransfer_1
BnaC02g35150D	2.81798	1.18485e-05	0.0002167	2.50993	6.18265e-05	0.00118596	1.90359	2.03965e-08	4.96804e-07	PF00685:Sulfotransferase domain	Sulfotransfer_1
BnaC02g35140D	10.1626	1.68115e-15	1.71621e-13	7.02294	1.61075e-13	2.08035e-11	5.89839	0.00757351	0.0509605	PF00685:Sulfotransferase domain	Sulfotransfer_1
BnaC01g41570D	2.16062	0.000500436	0.00639309	1.7526	0.000105781	0.00191118	1.82073	0.001235	0.0106836	PF00689:Cation transporting ATPase, C-terminus	Cation_ATPase_C
BnaC05g44550D	-1.90238	7.00672e-08	1.94574e-06	-1.65816	0.000103275	0.00187034	-1.8329	1.50128e-15	1.0695e-13	PF00690:Cation transporter/ATPase, N-terminus|PF00122:E1-E2 ATPase|PF00702:haloacid dehalogenase-like hydrolase|PF13246:Cation transport ATPase (P-type)|PF00689:Cation transporting ATPase, C-terminus	E1-E2_ATPase
BnaA02g01540D	-1.13072	6.31587e-05	0.00100129	-0.968137	0.000256743	0.00418227	-1.06625	3.53203e-05	0.000452206	PF00696:Amino acid kinase family	AA_kinase
BnaA03g18760D	-1.71604	0.00156436	0.0174136	-2.12082	0.0010753	0.0146915	-1.03875	0.0155335	0.0919204	PF00696:Amino acid kinase family|PF00171:Aldehyde dehydrogenase family	AA_kinase
BnaA04g17370D	3.31559	1.8674e-10	7.94705e-09	3.61491	8.13221e-09	3.70533e-07	3.80039	1.08099e-32	3.59499e-30	PF00698:Acyl transferase domain	Acyl_transf_1
BnaC03g16690D	3.98603	1.53939e-13	1.09643e-11	3.54163	3.37675e-09	1.68739e-07	3.53914	2.24019e-25	4.13895e-23	PF00698:Acyl transferase domain	Acyl_transf_1
BnaA02g33520D	-9.48899	1.20282e-11	6.32443e-10	-7.0865	6.36621e-10	3.73865e-08	-6.47216	4.29257e-16	3.2919e-14	PF00702:haloacid dehalogenase-like hydrolase|PF00122:E1-E2 ATPase	E1-E2_ATPase
BnaC01g01650D	-8.79261	2.61353e-16	3.01113e-14	-6.38943	2.30928e-11	1.87112e-09	-6.38795	0.000241708	0.00254065	PF00702:haloacid dehalogenase-like hydrolase|PF00122:E1-E2 ATPase	E1-E2_ATPase
BnaC01g08280D	-2.50524	5.55839e-05	0.000889486	-3.20302	0.000328437	0.00521657	-3.03879	0.000113711	0.00129811	PF00702:haloacid dehalogenase-like hydrolase|PF00122:E1-E2 ATPase	E1-E2_ATPase
BnaAnng23670D	-3.17628	2.9831e-14	2.38686e-12	-3.03575	1.02606e-31	2.0143e-28	-2.87244	1.8477e-34	7.45377e-32	PF00702:haloacid dehalogenase-like hydrolase|PF00122:E1-E2 ATPase|PF00690:Cation transporter/ATPase, N-terminus	E1-E2_ATPase
BnaA01g06820D	1.57096	6.29281e-05	0.000997865	1.31082	0.00110781	0.0150728	1.68689	8.65153e-18	8.04674e-16	PF00702:haloacid dehalogenase-like hydrolase|PF00122:E1-E2 ATPase|PF00690:Cation transporter/ATPase, N-terminus	E1-E2_ATPase
BnaA03g26330D	-8.05791	3.0621e-06	6.26506e-05	-5.88926	8.42266e-05	0.001562	-4.96924	0.000203947	0.00219034	PF00704:Glycosyl hydrolases family 18	-
BnaA03g00860D	-3.08121	1.80383e-07	4.62965e-06	-3.07845	3.15338e-05	0.000650266	-2.92945	3.06834e-11	1.19127e-09	PF00708:Acylphosphatase	-
BnaA04g02300D	-1.47817	3.57472e-05	0.000594689	-1.28983	0.0010559	0.0144495	-1.24941	1.24578e-07	2.64622e-06	PF00709:Adenylosuccinate synthetase	-
BnaA07g17380D	7.61018	2.44336e-09	8.59355e-08	8.83677	5.82012e-12	5.39676e-10	9.09449	2.44054e-13	1.29182e-11	PF00709:Adenylosuccinate synthetase	-
BnaA01g28550D	-0.986971	0.000464039	0.0059922	-0.728362	0.0793071	0.474916	-0.856152	0.00113432	0.00990694	PF00717:Peptidase S24-like	Peptidase_S24
BnaA10g00790D	-3.78625	2.34923e-13	1.62728e-11	-3.66565	3.76342e-24	3.11547e-21	-3.97622	4.69004e-46	4.77236e-43	PF00719:Inorganic pyrophosphatase	Pyrophosphatase
BnaC04g27080D	-2.11855	7.2114e-11	3.26701e-09	-1.72215	0.00101805	0.0140181	-1.75702	6.81048e-17	5.69009e-15	PF00719:Inorganic pyrophosphatase	Pyrophosphatase
BnaC01g08120D	-6.53662	1.48626e-32	1.20478e-29	-5.14844	2.76861e-13	3.40306e-11	-5.69826	6.12295e-47	7.07523e-44	PF00722:Glycosyl hydrolases family 16|PF06955:Xyloglucan endo-transglycosylase (XET) C-terminus	-
BnaA08g13110D	-4.02181	2.61845e-07	6.52848e-06	-4.50461	4.24085e-06	0.000105921	-3.26487	1.0396e-12	5.10262e-11	PF00722:Glycosyl hydrolases family 16|PF06955:Xyloglucan endo-transglycosylase (XET) C-terminus	-
BnaC01g09600D	-2.53017	1.11379e-05	0.000204859	-2.43669	5.39667e-07	1.67256e-05	-3.39382	2.15287e-18	2.13645e-16	PF00722:Glycosyl hydrolases family 16|PF06955:Xyloglucan endo-transglycosylase (XET) C-terminus	-
BnaA07g22900D	3.8423	0.00012795	0.00187764	3.19412	0.0152766	0.137642	4.21422	0.000236713	0.00249469	PF00732:GMC oxidoreductase|PF05199:GMC oxidoreductase	-
BnaA06g23950D	1.4626	0.000581844	0.00730696	1.3533	0.000310444	0.00496292	1.19849	2.20332e-06	3.69165e-05	PF00733:Asparagine synthase|PF13537:Glutamine amidotransferase domain	-
BnaA08g17480D	-2.01571	3.70849e-11	1.76831e-09	-1.99726	3.12465e-09	1.56813e-07	-2.03377	1.74671e-20	2.13411e-18	PF00736:EF-1 guanine nucleotide exchange domain	-
BnaAnng41850D	2.0486	0.000808608	0.0097813	1.96103	0.0127331	0.118952	2.32748	3.71972e-05	0.000473303	PF00743:Flavin-binding monooxygenase-like	FMO-like
BnaA06g07920D	3.06274	0.00449452	0.043305	5.07986	0.000519212	0.00780124	1.21931	0.221297	0.584704	PF00745:Glutamyl-tRNAGlu reductase, dimerisation domain|PF05201:Glutamyl-tRNAGlu reductase, N-terminal domain|PF01488:Shikimate / quinate 5-dehydrogenase	-
BnaA04g25070D	-1.5194	2.19097e-09	7.75721e-08	-1.23774	0.00654996	0.0687726	-1.00243	6.82037e-06	0.000102896	PF00753:Metallo-beta-lactamase superfamily|PF16123:Hydroxyacylglutathione hydrolase C-terminus	Lactamase_B
BnaA04g27800D	-3.95504	8.298e-08	2.28014e-06	-3.47796	9.90826e-07	2.91187e-05	-4.27207	4.19977e-07	8.11575e-06	PF00759:Glycosyl hydrolase family 9	-
BnaA09g00720D	-2.02084	4.07505e-06	8.12279e-05	-1.03096	0.173923	0.76516	-1.02311	0.000508576	0.00489312	PF00759:Glycosyl hydrolase family 9	-
BnaC07g39150D	1.15953	0.000617448	0.00769706	0.854693	0.0201511	0.171657	1.10545	0.000525731	0.00504181	PF00764:Arginosuccinate synthase	-
BnaC03g61950D	-5.07402	0.00083076	0.0100208	-1.11412	0.232096	0.873549	-3.15561	0.0171724	0.0997909	PF00780:CNH domain	CNH
BnaC03g16020D	-0.931883	0.00044854	0.00581743	-0.80167	0.152157	0.711356	-1.23189	4.41145e-05	0.000551237	PF00781:Diacylglycerol kinase catalytic domain	-
BnaAnng19930D	-2.97382	5.67803e-08	1.60558e-06	-3.08785	0.00202285	0.0253031	-3.46012	6.81696e-21	8.70324e-19	PF00782:Dual specificity phosphatase, catalytic domain	DSPc
BnaC01g06300D	-11.8047	1.53541e-21	3.8156e-19	-5.50967	3.71142e-10	2.29533e-08	-6.78537	0.000598356	0.0056579	PF00787:PX domain	PX
BnaC01g35630D	0.778911	0.00141929	0.0159526	0.623652	0.0499632	0.34268	0.709005	0.00595811	0.0416786	PF00787:PX domain	PX
BnaA01g04770D	10.2979	4.9236e-22	1.31472e-19	9.5822	6.18249e-27	7.07998e-24	6.87897	0.000627405	0.00589011	PF00787:PX domain	PX
BnaAnng01620D	0.91644	0.00101957	0.0119882	0.926245	0.054164	0.363652	1.05813	1.06897e-06	1.90133e-05	PF00787:PX domain|PF02984:Cyclin, C-terminal domain|PF00134:Cyclin, N-terminal domain|PF09325:Vps5 C terminal like	Cyclin_C
BnaAnng29860D	-1.57268	7.73815e-05	0.0011994	-0.943827	0.0269179	0.216294	-1.19007	0.000143454	0.00160172	PF00789:UBX domain|PF08059:SEP domain|PF14555:UBA-like domain	UBX
BnaC01g05650D	-7.37151	2.4738e-31	1.75462e-28	-5.37177	1.42072e-06	4.01552e-05	-6.27719	1.14113e-40	7.13742e-38	PF00790:VHS domain|PF03127:GAT domain	-
BnaA09g06820D	-4.09141	2.09945e-20	4.53822e-18	-3.18779	1.93941e-08	8.29704e-07	-3.94372	2.98291e-35	1.32917e-32	PF00795:Carbon-nitrogen hydrolase	CN_hydrolase
BnaA08g00710D	-1.60257	1.70625e-08	5.24279e-07	-1.55623	2.57576e-06	6.78605e-05	-1.90695	1.0016e-14	6.33444e-13	PF00795:Carbon-nitrogen hydrolase|PF02540:NAD synthase	NAD_synthase
BnaC05g44320D	-5.02876	6.81275e-17	8.59051e-15	-4.40979	1.21892e-08	5.41382e-07	-6.13442	6.41687e-26	1.24637e-23	PF00800:Prephenate dehydratase	-
BnaA06g04450D	-1.9319	4.47414e-05	0.000729697	-1.43512	0.000638736	0.00935968	-1.09813	0.0054865	0.0388391	PF00808:Histone-like transcription factor (CBF/NF-Y) and archaeal histone	-
BnaA06g05230D	2.48682	0.000506243	0.00646001	3.04551	4.28359e-05	0.000853118	2.70669	3.8355e-16	2.96137e-14	PF00808:Histone-like transcription factor (CBF/NF-Y) and archaeal histone	-
BnaA08g26690D	7.97732	1.5198e-09	5.55773e-08	6.59712	1.82463e-08	7.8602e-07	7.76157	4.8327e-09	1.31868e-07	PF00808:Histone-like transcription factor (CBF/NF-Y) and archaeal histone	-
BnaC01g38370D	9.37758	1.48752e-13	1.06171e-11	9.46709	9.51918e-14	1.285e-11	8.56916	1.77528e-12	8.38749e-11	PF00808:Histone-like transcription factor (CBF/NF-Y) and archaeal histone	-
BnaC01g07490D	-7.52089	1.67505e-08	5.15391e-07	-5.42041	1.10107e-07	4.00288e-06	-4.62338	2.07828e-08	5.0513e-07	PF00829:Ribosomal prokaryotic L21 protein	-
BnaCnng54270D	-9.58564	4.04702e-14	3.16379e-12	-4.72965	0.00015707	0.00270416	-6.57014	2.31755e-06	3.86328e-05	PF00830:Ribosomal L28 family	-
BnaA01g04920D	11.8411	4.89887e-22	1.31326e-19	10.1099	9.50879e-21	4.38489e-18	8.19962	4.64978e-07	8.92465e-06	PF00832:Ribosomal L39 protein	-
BnaC01g06470D	-10.3098	1.79261e-28	9.31758e-26	-5.16867	6.63007e-06	0.000159284	-6.55202	1.1907e-05	0.000169827	PF00832:Ribosomal L39 protein|PF05903:PPPDE putative peptidase domain	-
BnaC01g03990D	-12.1885	1.38526e-15	1.44226e-13	-5.96112	3.47456e-06	8.87168e-05	-6.17472	7.26053e-05	0.000863713	PF00847:AP2 domain	AP2
BnaA09g10750D	-5.95996	0.00437169	0.0422831	-0.939351	0.666003	0.999967	-3.88653	0.00293772	0.0226768	PF00847:AP2 domain	AP2
BnaC01g00660D	-5.06978	3.59632e-13	2.43659e-11	-3.99587	0.000448152	0.00686108	-6.07847	4.22922e-47	5.05845e-44	PF00847:AP2 domain	AP2
BnaC03g05820D	-4.75225	5.93862e-14	4.54344e-12	-3.70431	0.000183079	0.00309304	-5.08605	6.20637e-20	7.13534e-18	PF00847:AP2 domain	AP2
BnaA04g14830D	-4.7042	0.00184464	0.0200837	-2.33664	0.0630321	0.405709	-2.85687	0.0516695	0.233147	PF00847:AP2 domain	AP2
BnaA10g20950D	-3.37845	0.00202594	0.0217859	-1.21563	0.0718531	0.445218	-2.09003	0.0589234	0.255463	PF00847:AP2 domain	AP2
BnaA07g18690D	-3.18364	2.81196e-06	5.80034e-05	-2.05551	0.0238963	0.197014	-3.60983	3.4932e-06	5.62477e-05	PF00847:AP2 domain	AP2
BnaA09g18210D	-2.15077	9.56272e-06	0.000178344	-1.61966	0.0440324	0.313747	-2.58729	9.83375e-12	4.13588e-10	PF00847:AP2 domain	AP2
BnaC05g18050D	-1.74737	0.00397521	0.0389855	-0.980015	0.0714765	0.443565	-1.30422	5.50135e-05	0.000672479	PF00847:AP2 domain	AP2
BnaC05g17550D	-1.59511	0.00119959	0.0138279	-1.25699	0.00480595	0.0529873	-1.179	4.0141e-07	7.79007e-06	PF00847:AP2 domain	AP2
BnaA01g05760D	2.52524	3.46905e-05	0.000578665	2.07065	0.010525	0.102013	1.75155	1.15548e-05	0.000165323	PF00847:AP2 domain	AP2
BnaC09g07480D	4.07364	6.38584e-16	6.99098e-14	4.44522	2.21722e-08	9.35205e-07	3.70455	3.29989e-15	2.22086e-13	PF00847:AP2 domain	AP2
BnaA08g18380D	4.6578	5.80279e-16	6.40385e-14	5.67203	3.4305e-24	2.90999e-21	5.56824	6.47189e-40	3.87042e-37	PF00847:AP2 domain	AP2
BnaC04g50030D	5.25012	0.00516928	0.0486296	5.66841	0.000306657	0.00491037	5.88176	8.28938e-05	0.000974206	PF00847:AP2 domain	AP2
BnaA02g33530D	-14.7079	2.32031e-30	1.44947e-27	-6.78449	5.0166e-10	3.02723e-08	-7.20765	0.00502321	0.0359994	PF00854:POT family	-
BnaC05g28620D	-3.27632	9.52678e-08	2.58957e-06	-2.64883	0.0132681	0.122881	-2.55841	6.53666e-12	2.82589e-10	PF00854:POT family	-
BnaA05g01710D	-2.06554	0.00128847	0.014708	-1.54635	0.0399185	0.290643	-2.59027	7.98115e-06	0.000118545	PF00854:POT family	-
BnaA08g20790D	-1.4483	0.00120411	0.0138706	-1.31522	0.0079659	0.0811961	-1.10041	0.00190549	0.0156009	PF00854:POT family	-
BnaC05g17820D	-0.94196	0.00214204	0.0228182	-0.848459	0.00313766	0.0368527	-1.15097	6.97825e-05	0.000833624	PF00854:POT family	-
BnaC02g42260D	1.29623	0.00334964	0.0336055	1.04105	0.0654523	0.416603	0.757315	0.00840428	0.0555688	PF00854:POT family	-
BnaA07g23200D	1.37478	0.00201173	0.0216434	1.12734	0.030166	0.236314	1.63198	1.73394e-09	5.0998e-08	PF00854:POT family	-
BnaCnng04550D	2.38589	0.00182818	0.019946	1.6478	0.0750994	0.458347	2.76099	0.000659225	0.00614988	PF00854:POT family	-
BnaA06g34380D	7.18471	2.33548e-41	4.73423e-38	6.47236	2.107e-21	1.10513e-18	4.80064	9.21254e-19	9.47322e-17	PF00854:POT family	-
BnaA05g32380D	0.909589	0.00106363	0.0124418	0.909056	0.00145848	0.0191135	1.07493	1.78148e-05	0.000243982	PF00855:PWWP domain	PWWP
BnaA09g00500D	-9.30738	3.93626e-14	3.09203e-12	-5.27196	1.0965e-05	0.000252313	-7.11457	5.35762e-20	6.19087e-18	PF00856:SET domain	SET
BnaA05g03780D	-1.22001	0.00233522	0.0245761	-1.00819	0.00460264	0.0512059	-1.2907	1.42176e-06	2.47586e-05	PF00856:SET domain	SET
BnaA02g03480D	1.72199	0.000467463	0.00602812	1.62075	0.00248422	0.0302	1.85069	7.48044e-07	1.37241e-05	PF00856:SET domain	SET
BnaAnng01770D	3.15712	0.000868656	0.0104262	2.06529	0.0328252	0.251836	1.69703	0.00191886	0.015701	PF00856:SET domain	SET
BnaC01g01000D	-4.78081	9.19462e-16	9.81302e-14	-4.44777	1.82905e-05	0.000399981	-5.4786	1.98707e-17	1.75027e-15	PF00860:Permease family	-
BnaA02g02080D	-6.75394	6.9632e-06	0.000133333	-6.87466	1.55451e-06	4.34159e-05	-6.67834	9.11784e-07	1.64406e-05	PF00861:Ribosomal L18p/L5e family	-
BnaC05g06440D	1.93349	0.000170266	0.0024295	1.45112	0.0219166	0.183578	1.34678	0.00259671	0.0203814	PF00861:Ribosomal L18p/L5e family	-
BnaCnng71870D	0.963124	0.00223105	0.0236112	1.25	0.00432962	0.0485578	0.979976	0.000154913	0.0017166	PF00875:DNA photolyase|PF03441:FAD binding domain of DNA photolyase	-
BnaC04g49410D	-3.05443	4.68675e-22	1.26137e-19	-2.74913	5.09205e-19	1.74067e-16	-2.88983	9.77239e-23	1.43897e-20	PF00885:6,7-dimethyl-8-ribityllumazine synthase	-
BnaA04g25520D	-2.57308	6.19869e-18	9.23577e-16	-2.13123	3.90445e-14	5.70049e-12	-2.08013	1.79615e-21	2.41052e-19	PF00885:6,7-dimethyl-8-ribityllumazine synthase	-
BnaA08g07670D	1.48226	0.000559474	0.00705335	1.63062	0.000279449	0.00451574	1.78494	4.65898e-05	0.000578563	PF00887:Acyl CoA binding protein	-
BnaC03g08270D	6.16139	9.29855e-05	0.00141486	5.81266	0.000314042	0.00501343	5.22756	0.00141043	0.0120032	PF00888:Cullin family	Cullin
BnaC04g26900D	-2.6063	1.36154e-06	2.99544e-05	-2.84416	0.000310185	0.00495994	-2.61119	8.9989e-08	1.95759e-06	PF00888:Cullin family|PF08672:Anaphase promoting complex (APC) subunit 2	Cullin
BnaA09g52600D	-0.79419	0.00224042	0.023703	-0.896701	0.00426634	0.0480242	-0.865105	3.01876e-05	0.000391938	PF00890:FAD binding domain|PF02910:Fumarate reductase flavoprotein C-term	-
BnaC02g38150D	-6.67264	6.03564e-06	0.00011692	-5.44347	0.000879327	0.0123328	-6.54343	6.61596e-06	0.000100011	PF00892:EamA-like transporter family	DUF6
BnaC03g23030D	-3.23944	0.000179696	0.00254804	-4.32041	1.28468e-05	0.000291129	-2.46883	0.0017887	0.0147456	PF00892:EamA-like transporter family	DUF6
BnaC05g17180D	-2.76897	0.00219084	0.0232594	-2.71992	0.00225556	0.0277891	-3.32856	8.30132e-08	1.81861e-06	PF00892:EamA-like transporter family	DUF6
BnaA09g17610D	-1.84827	1.3676e-05	0.00024805	-2.32142	0.000729014	0.0104858	-2.08727	6.32097e-05	0.00076151	PF00892:EamA-like transporter family	DUF6
BnaC08g27520D	4.41879	2.84633e-07	7.05789e-06	3.38609	0.0010323	0.0141745	3.66411	9.52161e-10	2.91489e-08	PF00892:EamA-like transporter family	DUF6
BnaA04g21430D	7.12223	6.18454e-07	1.44861e-05	5.33703	2.93924e-07	9.69541e-06	5.6491	1.17095e-08	2.99329e-07	PF00892:EamA-like transporter family	DUF6
BnaA08g28200D	-1.50129	0.000569169	0.00715834	-1.29277	0.00138576	0.0182896	-0.825017	0.0288366	0.149894	PF00899:ThiF family	-
BnaA02g09250D	1.09688	0.00263392	0.0272314	1.32159	0.00524203	0.0569544	1.31112	1.39287e-05	0.000195634	PF00899:ThiF family|PF00581:Rhodanese-like domain	Rhodanese
BnaC03g05940D	-2.22083	9.24442e-08	2.51885e-06	-2.38957	1.99516e-08	8.50946e-07	-2.43559	5.3394e-29	1.32854e-26	PF00916:Sulfate permease family|PF01740:STAS domain	Sulfate_transp
BnaA04g08070D	-9.10017	3.63929e-10	1.4892e-08	-8.46593	1.11554e-09	6.15158e-08	-8.28092	2.58685e-13	1.36386e-11	PF00917:MATH domain	MATH
BnaA09g23270D	1.62312	0.00406075	0.03971	0.943656	0.244647	0.894241	0.924411	0.0477266	0.219659	PF00917:MATH domain	MATH
BnaA06g08320D	0.860483	0.00133669	0.0151518	1.12024	0.0131165	0.121772	1.06647	6.51599e-07	1.2121e-05	PF00923:Transaldolase	-
BnaA03g33540D	-2.31603	0.00014353	0.0020856	-1.86821	0.0348663	0.262699	-1.44091	0.00369775	0.0276393	PF00924:Mechanosensitive ion channel	-
BnaAnng01170D	0.825088	0.0018319	0.0199705	0.93978	0.00176979	0.0225398	0.842695	3.41506e-05	0.000438961	PF00928:Adaptor complexes medium subunit family	Adap_comp_sub
BnaC01g00700D	-4.85978	0.00172841	0.0189883	-3.42987	0.022679	0.188842	-4.67204	0.0381382	0.185815	PF00929:Exonuclease	Exonuc_X-T
BnaCnng66530D	-1.60438	0.00072762	0.00890605	-1.72617	0.0403391	0.293239	-1.64753	4.92553e-05	0.000608559	PF00931:NB-ARC domain	NB-ARC
BnaC09g07440D	4.91295	9.50594e-09	3.04597e-07	3.99522	0.000809349	0.0114684	2.99643	0.000201277	0.00216507	PF00931:NB-ARC domain	NB-ARC
BnaA06g29890D	8.60447	9.03014e-12	4.8263e-10	7.87295	5.24031e-09	2.51089e-07	7.75428	2.03422e-09	5.92165e-08	PF00931:NB-ARC domain	NB-ARC
BnaC03g62010D	-8.09915	1.24529e-10	5.43892e-09	-6.97809	3.28538e-10	2.05966e-08	-6.61019	3.29381e-09	9.20323e-08	PF00931:NB-ARC domain|PF01582:TIR domain	TIR
BnaA04g11180D	-3.95998	1.29259e-05	0.000234955	-3.9064	4.18239e-07	1.33078e-05	-3.37221	4.09269e-07	7.92679e-06	PF00931:NB-ARC domain|PF01582:TIR domain	TIR
BnaA07g22930D	1.65268	0.000200648	0.00281872	1.71838	0.00128192	0.017123	0.913287	0.0161688	0.0950364	PF00931:NB-ARC domain|PF01582:TIR domain	TIR
BnaC01g40310D	4.65033	1.48445e-09	5.4343e-08	6.71117	3.9781e-07	1.27239e-05	4.54479	3.00201e-09	8.47125e-08	PF00931:NB-ARC domain|PF01582:TIR domain	TIR
BnaA02g35050D	10.1761	7.46824e-16	8.07175e-14	6.24255	4.71018e-22	2.76612e-19	7.34178	7.62101e-17	6.31312e-15	PF00931:NB-ARC domain|PF01582:TIR domain	TIR
BnaC03g08660D	2.564	6.6558e-10	2.59119e-08	2.26001	5.09725e-07	1.58907e-05	2.74299	3.30304e-22	4.70121e-20	PF00931:NB-ARC domain|PF01582:TIR domain|PF07714:Protein tyrosine kinase	Pkinase_Tyr
BnaA03g25330D	-6.34209	0.000601138	0.00751737	-6.75676	1.49763e-06	4.20524e-05	-5.8525	0.000139586	0.0015634	PF00931:NB-ARC domain|PF01582:TIR domain|PF07725:Leucine Rich Repeat	TIR
BnaC06g04820D	-9.72165	1.79237e-14	1.49016e-12	-7.76632	3.85312e-12	3.70277e-10	-7.83512	1.39635e-18	1.41033e-16	PF00931:NB-ARC domain|PF13855:Leucine rich repeat	NB-ARC
BnaC02g42990D	-1.29368	0.0015957	0.0177277	-1.68298	7.68198e-05	0.00144176	-1.14419	0.00211506	0.0170647	PF00939:Sodium:sulfate symporter transmembrane region	Na_sulph_symp
BnaC01g03570D	1.36336	0.000540029	0.00685005	0.844596	0.0682008	0.428343	1.46181	2.82173e-07	5.63816e-06	PF00941:FAD binding domain in molybdopterin dehydrogenase|PF00111:2Fe-2S iron-sulfur cluster binding domain|PF01315:Aldehyde oxidase and xanthine dehydrogenase, a/b hammerhead domain|PF02738:Molybdopterin-binding domain of aldehyde dehydrogenase|PF01799:[2Fe-2S] binding domain|PF03450:CO dehydrogenase flavoprotein C-terminal domain	Fer2
BnaCnng46690D	3.63145	5.56388e-12	3.08008e-10	3.31751	1.2895e-09	7.01515e-08	2.73304	6.39699e-07	1.19198e-05	PF00941:FAD binding domain in molybdopterin dehydrogenase|PF03450:CO dehydrogenase flavoprotein C-terminal domain|PF01799:[2Fe-2S] binding domain|PF01315:Aldehyde oxidase and xanthine dehydrogenase, a/b hammerhead domain|PF02738:Molybdopterin-binding domain of aldehyde dehydrogenase|PF00111:2Fe-2S iron-sulfur cluster binding domain	Fer2
BnaC07g35200D	-2.02214	3.89883e-06	7.80802e-05	-1.54194	0.000251354	0.00410032	-1.6124	2.55883e-09	7.30838e-08	PF00953:Glycosyl transferase family 4	Glycos_transf_4
BnaC05g14430D	1.15013	0.000145512	0.00210989	1.21861	0.0044089	0.0493313	1.05917	0.000331476	0.00334647	PF00956:Nucleosome assembly protein (NAP)	-
BnaAnng01390D	1.76624	9.45311e-08	2.57057e-06	1.49819	0.000217196	0.00360261	1.53611	5.4135e-07	1.01953e-05	PF00957:Synaptobrevin	-
BnaA01g04780D	10.457	2.54684e-17	3.45451e-15	7.8553	4.3198e-27	5.11747e-24	6.32204	0.000753339	0.00692365	PF00957:Synaptobrevin|PF13774:Regulated-SNARE-like domain	-
BnaC06g38300D	1.16156	0.00101375	0.01193	0.879852	0.0709659	0.441153	0.861673	0.00305247	0.02343	PF00970:Oxidoreductase FAD-binding domain|PF00173:Cytochrome b5-like Heme/Steroid binding domain|PF00174:Oxidoreductase molybdopterin binding domain|PF03404:Mo-co oxidoreductase dimerisation domain|PF00175:Oxidoreductase NAD-binding domain	FAD_binding_6
BnaC03g09950D	1.04902	0.000608048	0.00759541	1.0668	0.000421034	0.00650388	1.14133	3.37311e-07	6.64064e-06	PF00970:Oxidoreductase FAD-binding domain|PF00175:Oxidoreductase NAD-binding domain	NAD_binding_1
BnaA02g18610D	2.77314	1.09997e-06	2.46051e-05	1.74366	0.053391	0.359904	1.68849	0.000650353	0.00607793	PF00970:Oxidoreductase FAD-binding domain|PF03404:Mo-co oxidoreductase dimerisation domain|PF00173:Cytochrome b5-like Heme/Steroid binding domain|PF00175:Oxidoreductase NAD-binding domain	FAD_binding_6
BnaCnng41250D	-1.51077	0.000999383	0.0117921	-1.3354	0.00350217	0.0405244	-1.67896	8.28687e-12	3.52663e-10	PF00982:Glycosyltransferase family 20|PF02358:Trehalose-phosphatase	-
BnaCnng57670D	-3.37583	5.15695e-05	0.000832091	-2.59024	0.00533037	0.0577705	-2.22819	0.00605964	0.0422775	PF00995:Sec1 family	Sec1
BnaC06g21140D	3.77949	3.32718e-07	8.17282e-06	4.12801	6.08523e-07	1.86243e-05	2.40798	1.09357e-05	0.000157257	PF00995:Sec1 family	Sec1
BnaC06g20810D	6.8958	2.15041e-06	4.52764e-05	6.79907	1.97877e-06	5.37397e-05	6.75987	7.93591e-07	1.44973e-05	PF00995:Sec1 family	Sec1
BnaC06g20830D	9.07508	7.06219e-13	4.52372e-11	9.10027	6.10976e-13	6.85951e-11	7.96301	1.34566e-10	4.71923e-09	PF00995:Sec1 family|PF03151:Triose-phosphate Transporter family	Sec1
BnaC05g45290D	-11.2483	3.11936e-20	6.49541e-18	-6.81967	4.83719e-15	8.37188e-13	-6.31378	0.00118554	0.0102976	PF00996:GDP dissociation inhibitor	-
BnaC05g45460D	-9.64412	1.75016e-11	8.99396e-10	-8.50606	1.72607e-09	9.08798e-08	-5.65838	3.61014e-05	0.000461167	PF00999:Sodium/hydrogen exchanger family	Na_H_Exchanger
BnaC05g46790D	-5.67693	1.08612e-13	8.0038e-12	-8.43126	9.03336e-08	3.34599e-06	-5.66274	5.66999e-26	1.10761e-23	PF00999:Sodium/hydrogen exchanger family	Na_H_Exchanger
BnaA08g15080D	-2.17118	3.3626e-05	0.000562424	-2.00793	0.0119922	0.113294	-1.40001	0.00783338	0.0523989	PF00999:Sodium/hydrogen exchanger family	Na_H_Exchanger
BnaC05g47000D	-10.3181	3.07983e-21	7.25635e-19	-7.19877	4.8955e-26	5.09651e-23	-5.91162	0.00215319	0.0173477	PF01015:Ribosomal S3Ae family	-
BnaA01g02490D	1.21414	0.00154876	0.0172625	1.1456	0.00046296	0.00705791	1.27362	8.80755e-10	2.7158e-08	PF01015:Ribosomal S3Ae family	-
BnaC03g06840D	2.48307	2.20178e-06	4.62719e-05	2.24679	4.7603e-08	1.87439e-06	1.39047	0.00290364	0.0224621	PF01016:Ribosomal L27 protein	-
BnaC01g00540D	-10.6514	7.54051e-18	1.11134e-15	-4.34235	0.000388623	0.00605219	-6.749	0.00052473	0.00503504	PF01019:Gamma-glutamyltranspeptidase	-
BnaC07g41830D	-3.38492	0.000488761	0.00626865	-2.63375	0.0408094	0.295782	-4.24144	0.000121631	0.00137883	PF01019:Gamma-glutamyltranspeptidase	-
BnaA08g14300D	-1.81483	0.000133904	0.00195742	-1.35255	0.00556628	0.0599372	-1.39427	6.17457e-05	0.000745849	PF01025:GrpE	-
BnaA03g41920D	3.07148	3.16902e-17	4.24768e-15	2.86395	1.13333e-07	4.10278e-06	3.07983	1.3068e-24	2.26698e-22	PF01027:Inhibitor of apoptosis-promoting Bax1	-
BnaCnng10840D	-2.61961	0.000330514	0.00442316	-4.36647	0.000468617	0.00713464	-2.54339	0.000636465	0.00596121	PF01042:Endoribonuclease L-PSP	Ribonuc_L-PSP
BnaC05g47220D	-9.0804	4.76214e-13	3.15427e-11	-6.58506	1.04075e-11	9.06445e-10	-4.74057	1.40996e-13	7.70853e-12	PF01042:Endoribonuclease L-PSP|PF01902:Diphthamide synthase	Ribonuc_L-PSP
BnaA08g16900D	-1.17192	1.99845e-05	0.000350741	-1.1056	0.000134977	0.00236527	-0.651575	0.000686419	0.00637739	PF01048:Phosphorylase superfamily	-
BnaC08g27980D	2.1989	0.000190123	0.00268082	2.56029	1.3433e-07	4.7972e-06	3.65952	3.23908e-17	2.78471e-15	PF01053:Cys/Met metabolism PLP-dependent enzyme	Cys_Met_Meta_PP
BnaC04g25770D	7.77471	4.94209e-09	1.65443e-07	7.60602	2.64901e-07	8.82274e-06	7.80166	1.26052e-09	3.79766e-08	PF01061:ABC-2 type transporter	ABC2_membrane
BnaA04g21310D	2.78767	4.01683e-05	0.000660653	2.23243	0.00375435	0.0430653	1.11809	0.0567263	0.248801	PF01061:ABC-2 type transporter|PF08370:Plant PDR ABC transporter associated|PF14510:ABC-transporter extracellular N-terminal|PF00005:ABC transporter	ABC2_membrane
BnaA06g10230D	1.6936	0.00398848	0.0391043	1.68113	0.155315	0.719603	1.1496	9.19208e-07	1.65569e-05	PF01061:ABC-2 type transporter|PF14510:ABC-transporter extracellular N-terminal|PF00005:ABC transporter|PF08370:Plant PDR ABC transporter associated	ABC2_membrane
BnaAnng29280D	4.81859	1.81145e-06	3.87141e-05	7.99043	4.61247e-09	2.23974e-07	5.25996	5.6376e-09	1.52157e-07	PF01063:Amino-transferase class IV	-
BnaC03g72300D	1.67599	8.98824e-11	4.02114e-09	1.72185	2.41456e-11	1.94724e-09	1.49639	1.47567e-16	1.18499e-14	PF01086:Clathrin light chain	-
BnaA01g33230D	10.9352	3.75422e-18	5.79657e-16	9.68705	8.57571e-26	8.53967e-23	8.43821	4.62498e-08	1.06669e-06	PF01090:Ribosomal protein S19e	-
BnaC01g06790D	-10.6606	3.30979e-18	5.18085e-16	-5.51034	0.0173878	0.152446	-6.83348	4.95369e-08	1.13903e-06	PF01092:Ribosomal protein S6e	-
BnaA09g02980D	2.72834	0.00333728	0.0335062	2.08609	0.0390676	0.285703	1.70175	0.128761	0.429661	PF01094:Receptor family ligand binding region|PF00060:Ligand-gated ion channel|PF00497:Bacterial extracellular solute-binding proteins, family 3	Lig_chan
BnaC04g08570D	-2.57409	0.00164627	0.0182092	-1.63261	0.015728	0.140917	-1.8169	0.000912635	0.00817929	PF01095:Pectinesterase	-
BnaC07g20260D	1.48259	0.000550106	0.00695967	1.95887	0.000169465	0.0028886	1.21066	1.62988e-05	0.000225211	PF01095:Pectinesterase	-
BnaC06g41940D	1.98298	4.7619e-06	9.39561e-05	1.46643	0.0173175	0.151926	1.47213	9.24602e-06	0.000135125	PF01095:Pectinesterase|PF04043:Plant invertase/pectin methylesterase inhibitor	-
BnaA08g27240D	6.67949	1.50058e-07	3.91888e-06	8.82575	1.22452e-09	6.71485e-08	8.11579	1.02566e-10	3.67448e-09	PF01095:Pectinesterase|PF04043:Plant invertase/pectin methylesterase inhibitor	-
BnaC03g37050D	0.864118	0.00506044	0.0477575	1.07638	0.00211351	0.0262462	1.35628	1.74462e-07	3.59664e-06	PF01103:Surface antigen|PF07244:Surface antigen variable number repeat	-
BnaC05g17190D	-7.82353	5.28809e-27	2.43292e-24	-5.54746	2.38693e-18	7.04674e-16	-6.76814	1.33089e-12	6.44425e-11	PF01105:emp24/gp25L/p24 family/GOLD	-
BnaC05g44290D	-6.39449	3.59268e-26	1.51006e-23	-4.85118	4.02092e-09	1.9819e-07	-7.0005	7.05932e-27	1.49002e-24	PF01105:emp24/gp25L/p24 family/GOLD	-
BnaA08g24150D	-2.14683	5.19708e-06	0.000102069	-2.13535	4.77137e-09	2.30874e-07	-2.16458	1.15694e-13	6.39186e-12	PF01105:emp24/gp25L/p24 family/GOLD	-
BnaA05g29960D	1.07459	8.03366e-06	0.000152119	0.972511	7.73194e-05	0.00144995	0.925309	3.20921e-05	0.000414613	PF01105:emp24/gp25L/p24 family/GOLD	-
BnaA03g26440D	-2.14409	4.66455e-10	1.87052e-08	-2.52428	3.88989e-09	1.92283e-07	-2.27342	5.04218e-11	1.88981e-09	PF01106:NifU-like domain	-
BnaC03g64390D	-1.2619	1.50908e-06	3.27976e-05	-1.0605	0.000463803	0.00706918	-0.855855	0.000722035	0.0066647	PF01125:G10 protein	-
BnaC02g34570D	7.05169	1.61593e-07	4.19162e-06	6.91244	1.0302e-07	3.76918e-06	6.82272	1.16336e-07	2.48165e-06	PF01128:2-C-methyl-D-erythritol 4-phosphate cytidylyltransferase	-
BnaC05g48080D	-2.22756	4.25636e-06	8.45996e-05	-2.03494	0.000103592	0.00187558	-2.10441	8.7221e-07	1.58064e-05	PF01138:3' exoribonuclease family, domain 1|PF03725:3' exoribonuclease family, domain 2|PF00575:S1 RNA binding domain|PF00013:KH domain	RNase_PH
BnaA03g07010D	-4.86082	0.000118806	0.00175708	-2.73901	0.0400624	0.291444	-6.48045	4.74312e-06	7.42349e-05	PF01150:GDA1/CD39 (nucleoside phosphatase) family	-
BnaC07g46320D	4.34373	4.45833e-05	0.000727294	3.66541	0.00016197	0.00277876	7.33292	1.78885e-07	3.68004e-06	PF01151:GNS1/SUR4 family	ELO
BnaC09g38990D	-2.42013	2.59033e-08	7.7127e-07	-2.41516	0.00619814	0.0655898	-2.85579	2.10016e-18	2.09328e-16	PF01156:Inosine-uridine preferring nucleoside hydrolase	-
BnaA08g26270D	-3.38435	8.7249e-18	1.27213e-15	-2.92091	2.67183e-18	7.81199e-16	-3.09606	6.94085e-37	3.42898e-34	PF01157:Ribosomal protein L21e	-
BnaC06g34900D	4.18309	1.01393e-13	7.52884e-12	4.75787	1.13248e-13	1.508e-11	4.95824	4.43342e-20	5.17556e-18	PF01159:Ribosomal protein L6e|PF03868:Ribosomal protein L6, N-terminal domain	-
BnaA03g22340D	1.6483	0.0026004	0.0269586	0.769381	0.417881	0.999967	1.38234	0.00202078	0.016409	PF01161:Phosphatidylethanolamine-binding protein	-
BnaA08g19460D	-1.77083	2.96862e-08	8.78091e-07	-1.60058	8.51277e-06	0.000200175	-1.75718	1.80883e-16	1.43896e-14	PF01169:Uncharacterized protein family UPF0016	-
BnaC04g29970D	1.0754	2.91146e-06	5.99106e-05	1.05647	0.000204421	0.00341414	0.909015	2.94507e-09	8.31744e-08	PF01169:Uncharacterized protein family UPF0016	-
BnaA02g06220D	2.06277	0.00240342	0.0251655	1.71112	0.0189029	0.162882	2.19591	0.00725954	0.0491632	PF01174:SNO glutamine amidotransferase family	-
BnaC08g23300D	-6.58243	2.96121e-06	6.08241e-05	-7.0466	3.63719e-07	1.17274e-05	-6.76643	5.5427e-07	1.04214e-05	PF01180:Dihydroorotate dehydrogenase	DHO_dh
BnaA06g26920D	-0.768795	0.000745188	0.00909983	-0.756928	0.0177606	0.155095	-0.839277	4.0711e-06	6.45168e-05	PF01182:Glucosamine-6-phosphate isomerases/6-phosphogluconolactonase	-
BnaA09g04900D	2.43212	5.0858e-05	0.000821193	4.56346	1.80278e-06	4.94653e-05	3.31037	3.85226e-06	6.14056e-05	PF01182:Glucosamine-6-phosphate isomerases/6-phosphogluconolactonase	-
BnaC07g30010D	3.27875	4.10619e-09	1.39033e-07	2.98996	0.000252234	0.00411271	3.56738	5.22165e-27	1.11596e-24	PF01182:Glucosamine-6-phosphate isomerases/6-phosphogluconolactonase	-
BnaC01g00880D	-6.08556	6.92995e-15	6.37658e-13	-3.81161	8.71385e-06	0.000204414	-4.95788	2.41412e-22	3.46494e-20	PF01189:16S rRNA methyltransferase RsmF	-
BnaA10g18500D	-1.36612	0.00463976	0.0444216	-0.997326	0.202866	0.82318	-0.760383	0.153662	0.478941	PF01190:Pollen proteins Ole e I like	-
BnaA07g19400D	2.2548	7.76646e-06	0.000147511	1.78183	0.0017428	0.0222456	1.81944	0.000121533	0.00137796	PF01190:Pollen proteins Ole e I like	-
BnaC04g26910D	-1.80934	8.60923e-06	0.000162071	-1.89845	2.37073e-07	7.98103e-06	-2.15662	3.09117e-12	1.40777e-10	PF01192:RNA polymerase Rpb6	-
BnaA07g16330D	-2.02187	3.85029e-05	0.000636026	-2.21962	2.12003e-07	7.22554e-06	-1.9964	8.96365e-07	1.6214e-05	PF01196:Ribosomal protein L17	-
BnaA09g09960D	1.09117	0.00459811	0.0441122	1.15973	0.000681873	0.00990518	0.847282	6.02719e-05	0.000730117	PF01198:Ribosomal protein L31e	Ribosomal_L31e
BnaAnng00820D	2.97906	3.03959e-15	2.94408e-13	3.20257	2.48874e-14	3.76655e-12	3.06188	2.51701e-31	7.6607e-29	PF01200:Ribosomal protein S28e	-
BnaC01g00420D	-2.97847	0.0011702	0.0135291	-2.25636	0.0376107	0.277695	-4.68797	9.90672e-09	2.56904e-07	PF01202:Shikimate kinase	SKI
BnaC01g00040D	-3.66194	5.36608e-10	2.11939e-08	-3.86168	1.45483e-07	5.15532e-06	-3.21733	9.08179e-16	6.61496e-14	PF01207:Dihydrouridine synthase (Dus)	Dus
BnaC05g38600D	-1.85307	0.000381804	0.00503046	-1.95004	2.59281e-06	6.82313e-05	-2.01895	1.96811e-11	7.86046e-10	PF01208:Uroporphyrinogen decarboxylase (URO-D)	-
BnaA06g35590D	-2.43301	0.00169145	0.0186515	-1.80445	0.0159208	0.142345	-1.62161	0.0273551	0.144246	PF01214:Casein kinase II regulatory subunit	-
BnaC01g38970D	8.51585	4.5688e-15	4.31476e-13	10.1136	3.54455e-16	7.56354e-14	6.86156	1.5938e-06	2.75435e-05	PF01217:Clathrin adaptor complex small chain	-
BnaC07g33330D	-2.64242	7.56182e-08	2.09391e-06	-3.60339	2.17143e-08	9.18146e-07	-1.529	0.00221093	0.0177604	PF01221:Dynein light chain type 1	-
BnaC05g43580D	-5.48859	1.05219e-28	5.55387e-26	-4.9369	4.07992e-24	3.31012e-21	-4.38003	4.06504e-31	1.19973e-28	PF01237:Oxysterol-binding protein	-
BnaC05g48220D	-5.76467	1.24554e-19	2.32995e-17	-4.19908	1.72321e-09	9.08684e-08	-6.09778	9.61832e-23	1.41935e-20	PF01238:Phosphomannose isomerase type I	-
BnaA05g33470D	1.42602	1.60896e-06	3.48127e-05	1.06675	0.00945043	0.0932824	1.22371	1.1462e-06	2.02918e-05	PF01238:Phosphomannose isomerase type I	-
BnaA08g08360D	-2.28508	2.00917e-07	5.13731e-06	-1.71741	0.000466347	0.0071048	-1.80894	1.38e-06	2.40744e-05	PF01245:Ribosomal protein L19	-
BnaCnng32900D	1.94977	2.29381e-08	6.93552e-07	1.73344	1.79512e-10	1.18599e-08	2.00255	2.07588e-15	1.45154e-13	PF01246:Ribosomal protein L24e	-
BnaA07g15010D	3.6751	0.00013576	0.00198115	2.24994	9.70699e-05	0.00177291	4.90118	1.48016e-14	9.21566e-13	PF01246:Ribosomal protein L24e	-
BnaC06g35200D	2.93118	1.14816e-18	1.92088e-16	3.10056	1.21287e-32	2.68827e-29	2.88561	1.57931e-25	2.97435e-23	PF01247:Ribosomal protein L35Ae	-
BnaAnng25500D	-3.90813	1.09988e-06	2.46051e-05	-3.24501	0.00539675	0.0583678	-3.7386	1.28513e-08	3.25269e-07	PF01248:Ribosomal protein L7Ae/L30e/S12e/Gadd45 family	-
BnaC06g34790D	2.04783	6.20034e-08	1.74242e-06	1.94077	8.32032e-08	3.10363e-06	2.22844	1.00202e-09	3.05653e-08	PF01248:Ribosomal protein L7Ae/L30e/S12e/Gadd45 family	-
BnaA06g28610D	5.12513	1.5244e-22	4.41694e-20	4.41554	1.26569e-16	2.86071e-14	4.21729	1.29444e-46	1.3789e-43	PF01249:Ribosomal protein S21e	Ribosomal_S21e
BnaC03g40680D	-1.58393	0.00307551	0.0311861	-1.56533	0.00270882	0.032522	-1.35782	0.00022147	0.00235663	PF01250:Ribosomal protein S6	-
BnaC05g48210D	-7.65117	7.57997e-09	2.46362e-07	-3.09904	2.52166e-07	8.43951e-06	-6.92295	1.42881e-14	8.92037e-13	PF01251:Ribosomal protein S7e	-
BnaA03g28000D	-0.956342	0.00262136	0.0271345	-1.01472	0.00496759	0.0544028	-0.979481	7.30098e-06	0.000109516	PF01251:Ribosomal protein S7e	-
BnaA05g33460D	1.28494	0.0029241	0.0298733	1.85439	6.92547e-08	2.63774e-06	1.86356	5.92254e-10	1.87977e-08	PF01251:Ribosomal protein S7e	-
BnaC03g33030D	2.05585	4.54048e-12	2.55298e-10	1.8943	3.1632e-13	3.81975e-11	2.04437	9.52045e-24	1.54908e-21	PF01251:Ribosomal protein S7e	-
BnaA08g14130D	-1.12805	6.83648e-07	1.58604e-05	-0.843379	0.00245212	0.029868	-1.2102	5.77594e-10	1.83666e-08	PF01253:Translation initiation factor SUI1	SUI1
BnaC03g09500D	9.26904	2.05939e-13	1.43969e-11	9.19751	6.71284e-13	7.42736e-11	9.25842	5.40334e-14	3.1245e-12	PF01256:Carbohydrate kinase	-
BnaA03g26110D	-4.75556	1.14319e-09	4.27464e-08	-3.95809	1.38443e-23	1.02284e-20	-4.09552	0.000791413	0.00723359	PF01257:Thioredoxin-like [2Fe-2S] ferredoxin	-
BnaA01g25350D	1.85088	0.000146476	0.00212206	1.25276	0.000550247	0.00821544	1.2745	0.00301296	0.0231658	PF01259:SAICAR synthetase	-
BnaC03g12990D	1.57865	0.000109725	0.00163665	1.3984	0.00216671	0.026805	1.30307	4.00801e-08	9.34188e-07	PF01263:Aldose 1-epimerase	Aldose_epim
BnaA03g27550D	5.88909	4.26679e-09	1.43898e-07	4.6328	5.71295e-08	2.21272e-06	5.50827	2.03861e-07	4.15374e-06	PF01263:Aldose 1-epimerase	Aldose_epim
BnaC05g44810D	-4.27464	2.29191e-13	1.59243e-11	-2.30162	9.13186e-07	2.71271e-05	-3.21183	7.57593e-16	5.5597e-14	PF01266:FAD dependent oxidoreductase	DAO
BnaC01g38650D	6.49603	5.0863e-18	7.66219e-16	6.08628	3.62498e-19	1.28388e-16	5.99489	3.11847e-31	9.4491e-29	PF01266:FAD dependent oxidoreductase|PF16901:C-terminal domain of alpha-glycerophosphate oxidase	DAO
BnaA06g02790D	-1.20552	2.97834e-05	0.00050347	-0.772848	0.105835	0.571645	-0.956088	0.000202075	0.00217263	PF01268:Formate--tetrahydrofolate ligase	-
BnaA09g00680D	-1.34828	0.000128299	0.00188195	-1.37829	0.00340131	0.0394771	-1.4405	1.7056e-09	5.02295e-08	PF01280:Ribosomal protein L19e	-
BnaA08g27220D	-0.742292	0.00285062	0.0292102	-0.600091	0.00772398	0.0791167	-0.687057	0.000896134	0.00805045	PF01280:Ribosomal protein L19e	-
BnaCnng23290D	2.75081	2.37974e-15	2.34839e-13	3.04855	7.90363e-21	3.66931e-18	2.65738	4.12851e-31	1.20801e-28	PF01280:Ribosomal protein L19e	-
BnaC05g46950D	-1.42543	0.00303595	0.0308579	-1.62372	1.64482e-07	5.76336e-06	-1.27929	2.43266e-09	6.96844e-08	PF01282:Ribosomal protein S24e	Ribosomal_S24e
BnaC08g27290D	-2.57768	7.72067e-08	2.13269e-06	-2.26154	4.27986e-07	1.36017e-05	-2.03651	7.60485e-12	3.25466e-10	PF01283:Ribosomal protein S26e	-
BnaA04g23390D	-2.1189	4.88756e-12	2.7301e-10	-2.16292	3.29903e-10	2.06633e-08	-2.30607	7.71078e-26	1.48837e-23	PF01283:Ribosomal protein S26e	-
BnaC03g69780D	1.78704	1.11636e-05	0.000205277	1.79678	9.40548e-06	0.000219142	2.24978	2.93137e-12	1.33947e-10	PF01283:Ribosomal protein S26e	-
BnaC01g01140D	-7.68846	2.80851e-65	6.37447e-61	-5.38581	8.77234e-13	9.47716e-11	-5.9173	1.22496e-34	5.06139e-32	PF01293:Phosphoenolpyruvate carboxykinase	-
BnaA09g05110D	6.91346	3.02251e-25	1.17603e-22	7.62585	2.9743e-26	3.19319e-23	6.65632	2.81327e-43	2.17952e-40	PF01294:Ribosomal protein L13e	-
BnaA08g30290D	-1.25916	0.000974275	0.0115393	-1.27898	0.0044194	0.0494233	-1.17852	0.000288595	0.0029703	PF01336:OB-fold nucleic acid binding domain|PF00152:tRNA synthetases class II (D, K and N)	tRNA-synt_2
BnaA04g14440D	-1.48258	0.00070075	0.00861433	-0.676401	0.0717406	0.444922	-1.27499	4.61865e-05	0.000574077	PF01336:OB-fold nucleic acid binding domain|PF08784:Replication protein A C terminal	tRNA_anti
BnaA08g19030D	-6.05621	1.44658e-07	3.79135e-06	-6.44423	3.25461e-06	8.37857e-05	-4.92707	3.6125e-06	5.79906e-05	PF01344:Kelch motif	Kelch_1
BnaA06g00430D	-2.64044	0.000810986	0.00980484	-1.23953	0.187736	0.793958	-2.42103	0.00064498	0.00603433	PF01344:Kelch motif	Kelch_1
BnaC08g48530D	-1.60545	3.6401e-07	8.8679e-06	-1.44812	0.000605336	0.00892737	-1.42873	4.8039e-07	9.15857e-06	PF01344:Kelch motif	Kelch_1
BnaC03g57670D	1.16842	0.00120182	0.0138488	0.849429	0.128522	0.643967	0.856767	0.0534496	0.238777	PF01344:Kelch motif	Kelch_1
BnaCnng66850D	3.95497	1.42732e-08	4.44591e-07	3.91124	0.000774449	0.0110285	4.07097	4.41745e-05	0.000551684	PF01344:Kelch motif	Kelch_1
BnaC03g30770D	-7.12782	3.12305e-08	9.20969e-07	-6.05151	3.79268e-07	1.21603e-05	-4.70658	0.00549444	0.0388805	PF01344:Kelch motif|PF00646:F-box domain	Kelch_1
BnaC08g24160D	-7.04388	1.05378e-05	0.000194994	-6.31571	6.61706e-05	0.00126084	-3.37188	0.333839	1	PF01344:Kelch motif|PF00646:F-box domain	Kelch_1
BnaA01g05560D	1.03873	0.00300059	0.0305401	1.04873	0.00917074	0.0910236	1.38343	6.71605e-06	0.000101389	PF01344:Kelch motif|PF00646:F-box domain	Kelch_1
BnaC09g03350D	1.3267	0.000507357	0.00647179	1.08284	0.0318471	0.246005	0.623713	0.0356791	0.176444	PF01344:Kelch motif|PF00646:F-box domain	Kelch_1
BnaC05g46370D	-8.08835	1.71567e-43	4.1722e-40	-5.9443	1.43407e-09	7.71612e-08	-6.66604	2.17913e-57	6.75292e-54	PF01344:Kelch motif|PF00887:Acyl CoA binding protein|PF13415:Galactose oxidase, central domain	Kelch_1
BnaA05g31780D	0.994811	7.41704e-06	0.000141268	1.05253	7.97369e-07	2.39559e-05	0.994516	2.39647e-09	6.88212e-08	PF01344:Kelch motif|PF00887:Acyl CoA binding protein|PF13415:Galactose oxidase, central domain	Kelch_1
BnaA04g18820D	-5.78554	9.25204e-13	5.79559e-11	-4.08557	0.000986377	0.0136476	-4.01998	2.97291e-07	5.91252e-06	PF01344:Kelch motif|PF13415:Galactose oxidase, central domain	Kelch_1
BnaA06g37510D	-10.5177	1.28142e-16	1.56648e-14	-6.72907	8.5076e-19	2.77041e-16	-5.72352	0.00621728	0.0432088	PF01344:Kelch motif|PF13415:Galactose oxidase, central domain|PF01419:Jacalin-like lectin domain	Kelch_1
BnaA06g01970D	-3.31539	2.02254e-09	7.21032e-08	-4.04199	2.31008e-07	7.80361e-06	-3.96039	1.91288e-52	3.62256e-49	PF01344:Kelch motif|PF13415:Galactose oxidase, central domain|PF01419:Jacalin-like lectin domain	Kelch_1
BnaC05g44250D	-6.27953	5.22634e-55	2.73744e-51	-4.98737	1.53999e-18	4.80967e-16	-5.37049	1.79903e-65	8.76077e-62	PF01344:Kelch motif|PF13418:Galactose oxidase, central domain	Kelch_1
BnaA06g14290D	5.21264	0.00333915	0.03352	5.23994	0.00305665	0.0360616	4.83398	0.00577147	0.0405353	PF01357:Pollen allergen	-
BnaC04g15200D	-5.52868	0.00272758	0.0280591	-1.71213	0.161499	0.735214	-3.9153	0.00311025	0.0238092	PF01357:Pollen allergen|PF03330:Rare lipoprotein A (RlpA)-like double-psi beta-barrel	-
BnaC01g05200D	-4.65217	3.97104e-13	2.66396e-11	-4.33134	3.01602e-10	1.90469e-08	-3.76448	9.32048e-14	5.2256e-12	PF01370:NAD dependent epimerase/dehydratase family	Epimerase
BnaC06g40190D	-2.34235	8.43922e-07	1.92572e-05	-1.87416	0.127598	0.640852	-3.17624	2.80141e-28	6.63156e-26	PF01370:NAD dependent epimerase/dehydratase family	Epimerase
BnaC06g34160D	1.04925	7.87574e-06	0.000149336	1.0412	0.000161757	0.0027758	0.815247	6.53293e-05	0.00078538	PF01370:NAD dependent epimerase/dehydratase family	Epimerase
BnaC07g42660D	1.25419	0.00227253	0.0239831	0.807121	0.101615	0.556805	1.29371	0.000333996	0.00337041	PF01370:NAD dependent epimerase/dehydratase family	Epimerase
BnaC07g07730D	1.56336	1.08079e-06	2.42239e-05	1.55052	1.98314e-05	0.000431344	1.72619	1.22016e-16	9.90307e-15	PF01370:NAD dependent epimerase/dehydratase family	Epimerase
BnaA07g35280D	1.705	0.000512335	0.00652985	1.65937	0.102323	0.559052	0.905596	0.00197867	0.01612	PF01370:NAD dependent epimerase/dehydratase family	Epimerase
BnaA08g05660D	-2.21205	0.00392861	0.0385948	-2.15514	0.0195574	0.16745	-2.3148	7.34947e-05	0.000872467	PF01373:Glycosyl hydrolase family 14	-
BnaA06g20090D	1.22426	1.45275e-08	4.51687e-07	1.07382	0.00270469	0.0324837	0.983098	7.0056e-09	1.85914e-07	PF01388:ARID/BRIGHT DNA binding domain	ARID
BnaC08g14580D	6.17083	0.000847408	0.0102053	4.79421	0.00866124	0.0870177	5.9912	0.116525	0.402681	PF01398:JAB1/Mov34/MPN/PAD-1 ubiquitin protease	Mov34
BnaA03g01760D	-0.988014	0.000553175	0.00699206	-1.26796	1.21773e-05	0.000277238	-0.915728	1.11414e-05	0.000160045	PF01398:JAB1/Mov34/MPN/PAD-1 ubiquitin protease|PF13012:Maintenance of mitochondrial structure and function	Mov34
BnaA02g02050D	-1.9843	1.02786e-09	3.88821e-08	-1.40709	0.000313866	0.00501195	-1.70465	2.24784e-12	1.04821e-10	PF01399:PCI domain	-
BnaA03g22570D	-0.887493	0.00156724	0.0174427	-0.713307	0.0522759	0.354648	-1.0133	6.20433e-07	1.1576e-05	PF01399:PCI domain	-
BnaA04g02470D	-1.0057	2.54883e-05	0.000436829	-0.989646	0.00439862	0.0492471	-1.00679	2.87088e-06	4.6959e-05	PF01399:PCI domain|PF09440:eIF3 subunit 6 N terminal domain	-
BnaCnng13480D	3.09286	3.397e-17	4.50887e-15	3.51371	3.85472e-13	4.51206e-11	3.40055	2.41987e-38	1.34128e-35	PF01399:PCI domain|PF10602:26S proteasome subunit RPN7	-
BnaA04g12390D	5.90381	3.7318e-09	1.27306e-07	3.07302	5.75147e-07	1.77371e-05	5.13711	3.75843e-09	1.04118e-07	PF01409:tRNA synthetases class II core domain (F)	tRNA-synt_2d
BnaC03g05800D	-7.29162	6.7116e-10	2.61143e-08	-5.6343	5.18736e-11	3.84907e-09	-8.05868	1.19853e-10	4.24251e-09	PF01412:Putative GTPase activating protein for Arf|PF16746:BAR domain of APPL family|PF00169:PH domain	PH
BnaC03g16800D	1.37393	0.00015042	0.00217265	1.30507	0.000855585	0.01204	1.34329	6.40802e-06	9.73208e-05	PF01416:tRNA pseudouridine synthase	-
BnaAnng35670D	-7.41876	3.50703e-08	1.02137e-06	-7.57361	1.04289e-08	4.6682e-07	-7.10866	7.9692e-08	1.75317e-06	PF01419:Jacalin-like lectin domain	-
BnaA10g03500D	-7.05797	2.18705e-07	5.55045e-06	-7.01623	1.99839e-07	6.87233e-06	-6.73897	8.34847e-07	1.5198e-05	PF01419:Jacalin-like lectin domain	-
BnaA06g37520D	-4.85649	0.00492179	0.0466884	-2.64302	0.103099	0.56204	-3.1529	0.00703729	0.0478865	PF01419:Jacalin-like lectin domain	-
BnaC05g03880D	-1.17256	0.00264917	0.0273642	-1.11579	0.00812376	0.0825227	-0.763884	0.0430079	0.203063	PF01419:Jacalin-like lectin domain	-
BnaC01g35290D	1.7827	0.000173854	0.00247189	1.5103	0.00419314	0.0473243	1.85775	1.53632e-14	9.5392e-13	PF01419:Jacalin-like lectin domain	-
BnaA04g23170D	3.20045	1.62744e-14	1.37486e-12	3.07204	3.96337e-06	9.96426e-05	3.17171	6.51975e-15	4.22519e-13	PF01419:Jacalin-like lectin domain	-
BnaC05g44350D	-5.1529	1.21621e-33	1.11909e-30	-4.35951	7.68038e-16	1.52962e-13	-4.29768	8.62798e-24	1.40723e-21	PF01423:LSM domain	LSM
BnaA03g26010D	-3.3156	0.00174331	0.0191211	-4.59645	0.000198818	0.00333027	-3.26404	5.02024e-06	7.83025e-05	PF01423:LSM domain	LSM
BnaA04g14000D	-2.38377	5.935e-11	2.72686e-09	-2.2776	6.49465e-11	4.75744e-09	-2.45973	1.75259e-20	2.13747e-18	PF01423:LSM domain	LSM
BnaC07g35260D	2.69004	0.00141463	0.0159081	3.90607	1.00605e-05	0.000233217	3.10753	1.06029e-05	0.000152922	PF01423:LSM domain	LSM
BnaA04g24110D	-3.14243	1.27506e-06	2.82159e-05	-2.90138	4.06602e-09	2.00126e-07	-3.31906	6.95795e-17	5.79201e-15	PF01428:AN1-like Zinc finger	zf-AN1
BnaAnng30120D	0.981698	0.00137828	0.015574	0.867093	0.0119784	0.113241	0.839611	0.00322926	0.0245877	PF01428:AN1-like Zinc finger	zf-AN1
BnaC05g37500D	-6.30686	1.40605e-09	5.16211e-08	-5.51159	1.4584e-09	7.82738e-08	-6.4543	4.1639e-09	1.14467e-07	PF01429:Methyl-CpG binding domain|PF00332:Glycosyl hydrolases family 17	Glyco_hydro_17
BnaA04g00200D	5.08329	0.000185512	0.00262014	4.29556	7.76587e-05	0.00145472	4.27134	1.21534e-05	0.000172798	PF01429:Methyl-CpG binding domain|PF07496:CW-type Zinc Finger	MBD
BnaA06g24520D	-1.0405	0.00160157	0.017778	-1.13415	0.000846388	0.0119268	-0.673717	0.00109404	0.00959271	PF01432:Peptidase family M3	Peptidase_M3
BnaC05g47320D	-9.6077	3.45292e-14	2.73705e-12	-5.51596	2.6458e-11	2.1188e-09	-9.1351	5.38065e-14	3.11402e-12	PF01434:Peptidase family M41|PF00004:ATPase family associated with various cellular activities (AAA)	AAA
BnaA10g18890D	2.61291	1.44993e-08	4.51015e-07	2.12668	9.96541e-10	5.55782e-08	2.84353	1.37359e-21	1.86174e-19	PF01434:Peptidase family M41|PF01016:Ribosomal L27 protein|PF00004:ATPase family associated with various cellular activities (AAA)	AAA
BnaAnng00330D	-8.7781	1.44386e-33	1.31085e-30	-6.98106	6.23304e-15	1.05706e-12	-6.19402	1.06018e-08	2.73163e-07	PF01439:Metallothionein	-
BnaC05g43490D	-4.73194	3.08809e-11	1.50408e-09	-4.30568	2.71327e-15	4.81728e-13	-3.39572	4.62417e-17	3.92111e-15	PF01439:Metallothionein	-
BnaA08g24210D	-2.73167	2.02971e-14	1.67157e-12	-2.18834	0.000436353	0.0067034	-2.84158	1.19014e-33	4.40972e-31	PF01448:ELM2 domain	ELM2
BnaC01g32850D	-2.06227	0.00201315	0.0216552	-1.58642	9.48395e-07	2.80035e-05	-1.31427	0.000118183	0.00134377	PF01459:Eukaryotic porin	-
BnaC09g07230D	5.36861	4.52147e-55	2.5656e-51	5.30683	6.95971e-45	1.1955e-40	5.10936	1.35347e-91	9.2274e-87	PF01459:Eukaryotic porin	-
BnaC05g12390D	2.77913	0.00533124	0.0499188	2.36536	0.0874865	0.50578	3.2357	0.00559258	0.0394577	PF01464:Transglycosylase SLT domain	-
BnaC04g06660D	-1.25101	0.00220304	0.0233679	-0.9119	0.00484325	0.0532874	-0.869069	0.000280518	0.00289592	PF01467:Cytidylyltransferase-like	CTP_transf_2
BnaC03g21530D	-0.742138	0.00310791	0.0314818	-0.620127	0.0152309	0.137284	-0.778047	0.000888606	0.00799019	PF01467:Cytidylyltransferase-like	CTP_transf_2
BnaC01g00830D	-6.46453	7.87485e-21	1.77552e-18	-4.21029	0.000569967	0.00846755	-5.91249	5.16057e-53	1.06614e-49	PF01474:Class-II DAHP synthetase family	-
BnaA06g25940D	-1.88682	0.000151325	0.00218371	-2.3935	NA	1	-1.62053	6.96313e-11	2.55775e-09	PF01476:LysM domain	LysM
BnaCnng52300D	-4.99872	3.66624e-26	1.53152e-23	-4.45233	6.31039e-12	5.79662e-10	-4.18016	1.91165e-31	5.87066e-29	PF01477:PLAT/LH2 domain	-
BnaA04g12670D	2.51979	5.93486e-06	0.000115131	1.94628	0.0245538	0.201372	2.69235	1.68076e-47	2.12199e-44	PF01477:PLAT/LH2 domain	-
BnaA01g36630D	1.62829	6.99791e-06	0.000133922	1.79468	1.19547e-07	4.30733e-06	1.66716	1.60897e-09	4.761e-08	PF01477:PLAT/LH2 domain|PF00305:Lipoxygenase	Lipoxygenase
BnaA02g02770D	1.76378	0.00019791	0.00278255	0.949055	0.0914122	0.519601	1.27686	6.78763e-05	0.000813275	PF01479:S4 domain|PF00163:Ribosomal protein S4/S9 N-terminal domain	S4
BnaC03g06830D	2.69341	4.8402e-13	3.19664e-11	2.80013	4.51392e-22	2.67372e-19	2.77221	2.514e-23	3.9042e-21	PF01479:S4 domain|PF00163:Ribosomal protein S4/S9 N-terminal domain	S4
BnaCnng68790D	-1.28365	2.53e-05	0.000434039	-1.39116	7.21108e-08	2.73894e-06	-1.28286	4.94839e-12	2.17934e-10	PF01480:PWI domain|PF00076:RNA recognition motif. (a.k.a. RRM, RBD, or RNP domain)	RRM_1
BnaC01g04040D	-3.17674	7.25353e-17	9.07905e-15	-2.56588	5.02578e-13	5.69838e-11	-2.764	6.02756e-24	9.92596e-22	PF01485:IBR domain, a half RING-finger domain	IBR
BnaA01g02770D	0.913901	0.00219736	0.0233199	1.05126	0.000819003	0.0115909	1.14059	6.60962e-07	1.22817e-05	PF01485:IBR domain, a half RING-finger domain	IBR
BnaC03g50620D	4.08046	9.29202e-09	2.99009e-07	3.98817	5.82039e-10	3.4625e-08	4.23427	3.27226e-23	5.04727e-21	PF01485:IBR domain, a half RING-finger domain	IBR
BnaC02g38140D	-5.87697	2.18033e-06	4.58779e-05	-5.8215	6.81645e-06	0.000163476	-7.34725	2.67352e-08	6.39319e-07	PF01486:K-box region	K-box
BnaC01g01080D	-8.98392	1.64116e-12	9.81971e-11	-7.04457	4.17012e-12	3.96306e-10	-8.68536	2.63298e-12	1.20961e-10	PF01486:K-box region|PF00319:SRF-type transcription factor (DNA-binding and dimerisation domain)	SRF-TF
BnaC01g04170D	-4.97992	7.81918e-23	2.38751e-20	-4.40363	2.15332e-08	9.12625e-07	-4.64873	6.04493e-23	9.11768e-21	PF01486:K-box region|PF00319:SRF-type transcription factor (DNA-binding and dimerisation domain)	SRF-TF
BnaC03g34680D	-5.61175	1.44219e-47	4.26957e-44	-5.34791	2.80535e-16	6.08063e-14	-4.65036	2.91693e-57	8.64629e-54	PF01488:Shikimate / quinate 5-dehydrogenase|PF01487:Type I 3-dehydroquinase|PF08501:Shikimate dehydrogenase substrate binding domain	-
BnaA03g29410D	2.34136	1.05725e-11	5.61538e-10	2.29223	0.000493076	0.0074509	1.67961	2.53065e-12	1.1689e-10	PF01488:Shikimate / quinate 5-dehydrogenase|PF08501:Shikimate dehydrogenase substrate binding domain|PF01487:Type I 3-dehydroquinase	-
BnaC02g38180D	-9.99292	8.46515e-16	9.09149e-14	-9.12316	2.38108e-13	2.99093e-11	-6.24771	0.000106004	0.00121829	PF01490:Transmembrane amino acid transporter protein	Aa_trans
BnaA06g22970D	-5.44125	8.74913e-23	2.64772e-20	-5.66786	4.47318e-17	1.06987e-14	-3.84655	1.94298e-19	2.12387e-17	PF01490:Transmembrane amino acid transporter protein	Aa_trans
BnaA03g55030D	-4.33103	0.00482109	0.0458802	-4.68305	0.00994861	0.0973745	-2.41568	0.0109688	0.0692419	PF01490:Transmembrane amino acid transporter protein	Aa_trans
BnaA03g19350D	2.68489	9.63382e-06	0.000179376	1.5254	9.59704e-05	0.00175422	1.15274	0.00702649	0.0478273	PF01490:Transmembrane amino acid transporter protein	Aa_trans
BnaA07g15490D	3.47352	2.32292e-13	1.61233e-11	2.55819	0.0137327	0.126315	2.35708	6.84811e-14	3.91675e-12	PF01490:Transmembrane amino acid transporter protein	Aa_trans
BnaC06g40470D	3.8526	2.12206e-15	2.12489e-13	4.77962	1.67922e-22	1.06833e-19	3.89934	1.63525e-33	5.93004e-31	PF01490:Transmembrane amino acid transporter protein	Aa_trans
BnaA05g02050D	4.38496	0.00257469	0.0267286	3.79309	0.0236771	0.195582	2.7577	0.0315004	0.160422	PF01490:Transmembrane amino acid transporter protein	Aa_trans
BnaA04g23740D	-1.06994	8.10882e-06	0.000153372	-1.09285	0.0019422	0.0244366	-1.08252	9.43837e-10	2.8946e-08	PF01493:GXGXG motif|PF04898:Glutamate synthase central domain|PF01645:Conserved region in glutamate synthase|PF00310:Glutamine amidotransferases class-II	GATase_2
BnaAnng31700D	-6.03889	3.29165e-05	0.000551448	-5.95853	0.00010012	0.00182039	-5.71729	0.0001761	0.00192185	PF01494:FAD binding domain	FAD_binding_3
BnaC01g00150D	-3.01551	2.06885e-29	1.1875e-26	-2.73733	4.20671e-25	3.95949e-22	-2.99492	6.39033e-48	8.22013e-45	PF01496:V-type ATPase 116kDa subunit family	-
BnaC04g10930D	7.90302	1.11448e-11	5.89176e-10	8.0001	6.69468e-13	7.41921e-11	5.44014	1.07478e-05	0.000154783	PF01496:V-type ATPase 116kDa subunit family|PF02636:Putative S-adenosyl-L-methionine-dependent methyltransferase	-
BnaA03g17980D	1.07985	0.000722669	0.00885979	0.869031	0.0308986	0.240408	1.02387	3.3675e-06	5.44374e-05	PF01501:Glycosyl transferase family 8	Glyco_transf_8
BnaC03g66670D	1.94407	0.000301102	0.00407034	0.913602	0.0825395	0.487663	1.24759	0.000589292	0.00558614	PF01501:Glycosyl transferase family 8	Glyco_transf_8
BnaA07g29040D	-0.669286	0.0027237	0.028039	-0.697631	0.0284272	0.225598	-0.715401	0.000290863	0.00298913	PF01504:Phosphatidylinositol-4-phosphate 5-Kinase|PF00118:TCP-1/cpn60 chaperonin family	PIP5K
BnaAnng00860D	3.27316	2.22892e-07	5.6378e-06	2.62526	0.000458936	0.00700433	2.08114	7.6003e-05	0.000899736	PF01521:Iron-sulphur cluster biosynthesis	-
BnaC05g43550D	-8.56733	1.54885e-11	8.0139e-10	-5.22554	1.66104e-07	5.80815e-06	-7.89402	2.32707e-10	7.91669e-09	PF01529:DHHC palmitoyltransferase	-
BnaA05g29090D	-8.07141	9.58217e-10	3.64096e-08	-6.81002	1.47598e-07	5.22218e-06	-7.22513	7.265e-09	1.922e-07	PF01529:DHHC palmitoyltransferase	-
BnaA01g24840D	-1.117	0.00287111	0.0293848	-0.675814	0.213226	0.841951	-1.44575	0.000686698	0.00637911	PF01529:DHHC palmitoyltransferase	-
BnaA03g26730D	1.17707	0.00234944	0.0246892	0.713967	0.101948	0.557847	1.06668	0.0032575	0.024775	PF01529:DHHC palmitoyltransferase	-
BnaC07g37520D	2.54257	9.58387e-08	2.60405e-06	2.41295	4.45689e-08	1.763e-06	2.63172	6.44864e-16	4.82064e-14	PF01529:DHHC palmitoyltransferase	-
BnaC03g41930D	-1.29759	0.00499359	0.0472576	-1.2395	0.00535859	0.0580191	-1.31933	1.64321e-08	4.08412e-07	PF01532:Glycosyl hydrolase family 47	-
BnaC01g00810D	-5.68053	0.000180558	0.00255813	-5.12386	0.0011697	0.015796	-5.74506	0.000125338	0.00141686	PF01535:PPR repeat|PF13041:PPR repeat family	PPR
BnaC05g47060D	-4.17689	0.000235528	0.0032656	-3.77461	0.00222143	0.0274276	-4.89607	5.33542e-05	0.000654105	PF01535:PPR repeat|PF13041:PPR repeat family	PPR
BnaC04g45040D	5.59504	9.37506e-09	3.0097e-07	5.94857	3.74974e-07	1.20451e-05	5.16432	1.0236e-09	3.11819e-08	PF01535:PPR repeat|PF13041:PPR repeat family	PPR
BnaAnng36830D	1.68356	4.82015e-09	1.61561e-07	1.38847	3.67668e-08	1.47648e-06	1.40403	3.01021e-07	5.9832e-06	PF01536:Adenosylmethionine decarboxylase	SAM_decarbox
BnaA02g00130D	-1.81371	0.00127804	0.0146159	-3.7406	2.91998e-06	7.59394e-05	-2.22585	3.61529e-06	5.8008e-05	PF01544:CorA-like Mg2+ transporter protein	-
BnaC02g25960D	2.07269	4.05173e-06	8.08012e-05	3.25737	6.18006e-10	3.64875e-08	1.82553	9.31292e-06	0.000135986	PF01544:CorA-like Mg2+ transporter protein	-
BnaA03g21530D	-3.05449	5.53338e-05	0.000886108	-3.09841	3.27751e-07	1.06779e-05	-2.097	0.000261195	0.00272157	PF01545:Cation efflux family	-
BnaA06g10910D	-1.73275	1.3917e-06	3.05389e-05	-0.800349	0.00432974	0.0485578	-1.11182	0.000698352	0.00647063	PF01545:Cation efflux family|PF16916:Dimerisation domain of Zinc Transporter	-
BnaA10g07220D	-7.8941	1.84093e-09	6.63583e-08	-8.02183	1.26917e-09	6.92101e-08	-8.02579	1.70291e-10	5.89926e-09	PF01546:Peptidase family M20/M25/M40	Peptidase_M20
BnaAnng17940D	1.06943	7.42408e-05	0.00115811	1.14183	0.00711249	0.0738216	1.24839	4.0123e-14	2.3622e-12	PF01546:Peptidase family M20/M25/M40	Peptidase_M20
BnaA05g33250D	1.25668	2.11725e-05	0.000369845	1.56415	0.0022534	0.0277674	1.93388	4.80925e-15	3.18325e-13	PF01546:Peptidase family M20/M25/M40|PF07687:Peptidase dimerisation domain	Peptidase_M20
BnaC06g40070D	-2.72914	1.14436e-09	4.27664e-08	-2.77879	1.81811e-10	1.20002e-08	-2.89961	8.37844e-13	4.1603e-11	PF01553:Acyltransferase	Acyltransferase
BnaA01g02170D	-1.4835	4.24558e-08	1.21926e-06	-1.392	0.000218472	0.00361978	-1.13241	9.8917e-07	1.77048e-05	PF01553:Acyltransferase	Acyltransferase
BnaA10g13450D	-1.33154	0.00128439	0.0146762	-0.963662	0.0362712	0.270233	-0.642926	0.0198498	0.111842	PF01553:Acyltransferase	Acyltransferase
BnaC06g39090D	0.96105	0.00451123	0.0434475	1.37627	0.000232377	0.00382343	1.11235	0.000270089	0.00280062	PF01553:Acyltransferase	Acyltransferase
BnaA10g04260D	1.56744	0.00266391	0.0275122	1.2374	0.00143495	0.0188339	1.67973	3.66387e-05	0.000467155	PF01553:Acyltransferase	Acyltransferase
BnaA07g20190D	9.78052	3.99171e-15	3.80139e-13	6.78077	1.42469e-15	2.68929e-13	6.57354	6.17316e-17	5.17029e-15	PF01553:Acyltransferase	Acyltransferase
BnaAnng29060D	-7.54462	6.71354e-08	1.87119e-06	-6.57595	3.41119e-06	8.72285e-05	-6.41698	3.95118e-06	6.28355e-05	PF01554:MatE	MatE
BnaAnng29050D	-7.01454	5.15368e-06	0.000101275	-6.98229	4.37012e-05	0.000869091	-6.54316	3.94852e-06	6.28078e-05	PF01554:MatE	MatE
BnaC03g42250D	-5.95835	5.25017e-05	0.000845328	-5.14246	0.000412733	0.00639461	-6.11141	2.0738e-05	0.000279359	PF01554:MatE	MatE
BnaAnng40100D	-5.46231	0.00126789	0.0145145	-5.39786	0.00277634	0.0332223	-5.00251	0.00582244	0.0408469	PF01554:MatE	MatE
BnaA05g29700D	-3.09977	6.9282e-08	1.92708e-06	-2.40234	0.00297673	0.0352822	-2.49085	1.1103e-10	3.95898e-09	PF01554:MatE	MatE
BnaA07g26020D	-2.33549	3.85202e-06	7.72115e-05	-2.43978	1.44441e-06	4.07078e-05	-2.30312	9.64496e-10	2.95e-08	PF01554:MatE	MatE
BnaA07g26010D	-1.23338	0.00215475	0.0229356	-1.75222	0.000858236	0.012066	-0.890893	0.0016595	0.0138125	PF01554:MatE	MatE
BnaC03g64740D	0.837486	0.00462753	0.0443232	0.673857	0.449398	0.999967	0.65416	0.0494464	0.225559	PF01554:MatE	MatE
BnaC07g39840D	1.52914	0.0019614	0.0211788	1.28829	0.0338598	0.257456	1.61703	0.00102208	0.00904129	PF01554:MatE	MatE
BnaC06g23470D	3.02862	0.00272493	0.0280404	0.622321	0.286401	0.949189	2.20266	0.00224459	0.0179969	PF01554:MatE	MatE
BnaCnng17090D	3.92723	1.61215e-11	8.32246e-10	3.93195	7.67551e-05	0.00144133	3.39587	1.06933e-15	7.75557e-14	PF01554:MatE	MatE
BnaC06g34520D	4.27308	0.00225945	0.0238747	4.43458	0.000706748	0.0102083	2.11973	0.026306	0.139904	PF01554:MatE	MatE
BnaC07g37580D	6.92568	1.67262e-07	4.32714e-06	3.15591	0.00133572	0.0177313	3.49985	4.60245e-06	7.22321e-05	PF01554:MatE	MatE
BnaC09g06920D	7.68196	7.20297e-09	2.34781e-07	8.40048	1.18076e-10	8.0887e-09	4.55485	7.71849e-07	1.41401e-05	PF01554:MatE	MatE
BnaC06g27730D	7.6963	7.33425e-09	2.38717e-07	7.85606	4.94286e-09	2.38165e-07	8.25068	6.7442e-11	2.48015e-09	PF01554:MatE	MatE
BnaC05g43650D	-4.1756	5.67187e-09	1.87519e-07	-3.00689	4.26893e-05	0.000850443	-4.95853	1.05926e-10	3.79287e-09	PF01556:DnaJ C terminal domain|PF00226:DnaJ domain	DnaJ_C
BnaC01g39280D	3.77372	4.95734e-20	9.93127e-18	2.4297	4.3025e-06	0.00010711	3.02207	7.74018e-16	5.67413e-14	PF01556:DnaJ C terminal domain|PF00226:DnaJ domain	DnaJ_C
BnaC01g00820D	-3.54175	3.58763e-08	1.04128e-06	-3.08323	1.93221e-14	2.98341e-12	-3.33841	4.68202e-18	4.47061e-16	PF01556:DnaJ C terminal domain|PF00684:DnaJ central domain|PF00226:DnaJ domain	DnaJ_C
BnaA06g38260D	1.67281	5.3196e-07	1.25814e-05	1.53006	0.00177882	0.0226381	1.58968	4.21816e-17	3.59471e-15	PF01557:Fumarylacetoacetate (FAA) hydrolase family|PF09298:Fumarylacetoacetase N-terminal	FAA_hydrolase
BnaC09g38120D	-1.79811	7.26616e-07	1.67943e-05	-1.23964	0.0379676	0.279662	-1.16605	5.66059e-05	0.000689259	PF01564:Spermine/spermidine synthase	-
BnaA08g20290D	-1.29673	0.00148021	0.0165744	-0.818854	0.0272289	0.218257	-0.713418	0.0020086	0.0163313	PF01564:Spermine/spermidine synthase	-
BnaA04g20350D	-1.39909	0.00101218	0.0119158	-1.87225	0.030791	0.239788	-2.11817	1.61964e-15	1.14783e-13	PF01565:FAD binding domain	FAD_binding_4
BnaC04g10420D	-2.77191	1.17701e-07	3.14042e-06	-2.04615	2.22259e-06	5.95376e-05	-2.23602	1.0485e-06	1.86735e-05	PF01565:FAD binding domain|PF08031:Berberine and berberine like	FAD_binding_4
BnaC06g19550D	-2.95021	4.92916e-05	0.000797983	-2.95128	5.52655e-05	0.00107026	-1.64187	0.0157172	0.0927817	PF01566:Natural resistance-associated macrophage protein	-
BnaC05g48240D	-2.63772	0.000108983	0.00162737	-2.03672	8.81884e-05	0.00162713	-2.27443	2.92179e-19	3.14189e-17	PF01569:PAP2 superfamily	-
BnaA06g07360D	3.19305	1.20494e-06	2.68175e-05	2.85898	0.00131155	0.0174679	3.08055	2.04841e-28	4.96514e-26	PF01571:Aminomethyltransferase folate-binding domain|PF08669:Glycine cleavage T-protein C-terminal barrel domain|PF00800:Prephenate dehydratase|PF00903:Glyoxalase/Bleomycin resistance protein/Dioxygenase superfamily	GCV_T
BnaA09g17530D	-10.6783	5.449e-18	8.17243e-16	-4.67671	1.15579e-05	0.000264626	-7.49021	9.40086e-06	0.00013713	PF01582:TIR domain	TIR
BnaC08g20210D	-3.31529	1.18164e-05	0.000216171	-7.18106	1.67979e-06	4.65396e-05	-4.32904	5.27217e-06	8.17085e-05	PF01582:TIR domain	TIR
BnaC03g76970D	-2.73363	0.00261807	0.0271088	-2.55059	0.000749152	0.010726	-1.63525	9.38602e-05	0.00109086	PF01582:TIR domain	TIR
BnaC02g34950D	6.18587	5.75037e-05	0.00091762	3.56899	0.243756	1	5.39696	0.00274023	0.0213629	PF01582:TIR domain	TIR
BnaC03g62020D	-7.11532	6.18945e-07	1.44926e-05	-8.01147	1.32617e-09	7.19185e-08	-6.93082	5.43298e-08	1.24087e-06	PF01582:TIR domain|PF00931:NB-ARC domain	TIR
BnaA08g10100D	2.17862	0.00015367	0.00221404	2.25416	1.55554e-06	4.34159e-05	3.07634	9.88397e-14	5.52336e-12	PF01582:TIR domain|PF00931:NB-ARC domain	TIR
BnaA08g16300D	6.25681	2.22094e-06	4.66602e-05	6.33645	2.63583e-06	6.93102e-05	6.48739	2.69586e-05	0.000354881	PF01582:TIR domain|PF00931:NB-ARC domain	TIR
BnaC06g34070D	8.74945	3.03736e-11	1.48427e-09	8.89654	2.58772e-10	1.66637e-08	8.76529	3.85796e-12	1.73012e-10	PF01582:TIR domain|PF00931:NB-ARC domain	TIR
BnaC05g47420D	-9.8466	3.88806e-14	3.0606e-12	-9.08002	3.87858e-13	4.53227e-11	-6.01209	6.35451e-15	4.13382e-13	PF01582:TIR domain|PF00931:NB-ARC domain|PF07725:Leucine Rich Repeat	TIR
BnaC03g62030D	-9.22561	1.09743e-11	5.81067e-10	-7.15957	1.71727e-09	9.06247e-08	-6.53749	5.03197e-13	2.57552e-11	PF01582:TIR domain|PF00931:NB-ARC domain|PF07725:Leucine Rich Repeat	NB-ARC
BnaA08g09210D	-9.0953	4.09478e-12	2.31384e-10	-5.27872	1.73756e-08	7.50393e-07	-8.16172	4.975e-11	1.86771e-09	PF01582:TIR domain|PF00931:NB-ARC domain|PF07725:Leucine Rich Repeat|PF12799:Leucine Rich repeats (2 copies)	NB-ARC
BnaC05g47410D	-5.28888	0.00176543	0.0193294	-5.32738	0.00199381	0.0249808	-3.43718	0.0190698	0.108315	PF01582:TIR domain|PF05253:U11-48K-like CHHC zinc finger	TIR
BnaA09g18030D	-3.59277	0.0022865	0.0241192	-2.5833	8.68807e-05	0.00160602	-1.0056	0.4116	0.781608	PF01582:TIR domain|PF07725:Leucine Rich Repeat|PF00931:NB-ARC domain	TIR
BnaA09g11760D	-2.47238	4.16e-05	0.000682551	-2.12219	0.000145772	0.0025293	-1.81695	4.92366e-06	7.69368e-05	PF01582:TIR domain|PF07725:Leucine Rich Repeat|PF00931:NB-ARC domain	TIR
BnaC01g00790D	-5.82766	8.4257e-10	3.22131e-08	-6.23839	6.51623e-23	4.4773e-20	-5.39271	4.29289e-27	9.23255e-25	PF01583:Adenylylsulphate kinase	-
BnaC07g51290D	1.05238	0.00388457	0.0382066	0.735908	0.150829	0.707402	1.07411	2.15688e-06	3.62097e-05	PF01583:Adenylylsulphate kinase	-
BnaA09g11330D	-1.18332	5.33604e-06	0.000104497	-0.918132	0.00534742	0.0579255	-0.969003	8.97048e-07	1.62181e-05	PF01585:G-patch domain	G-patch
BnaA09g04120D	-1.06406	8.72912e-05	0.00133898	-0.684291	0.102233	0.558663	-1.19869	2.27082e-05	0.000303322	PF01585:G-patch domain	G-patch
BnaC08g25080D	5.86951	4.41858e-21	1.03036e-18	5.44001	2.18447e-16	4.78009e-14	6.36985	1.88506e-29	4.82895e-27	PF01585:G-patch domain|PF00076:RNA recognition motif. (a.k.a. RRM, RBD, or RNP domain)	RRM_1
BnaA08g27820D	-1.81235	0.000119426	0.00176587	-1.86714	0.00508532	0.0554799	-1.63202	0.000105908	0.0012174	PF01590:GAF domain|PF00917:MATH domain	MATH
BnaC05g46990D	-9.28818	9.62059e-12	5.12579e-10	-7.03101	8.2552e-11	5.89621e-09	-5.25905	0.0033805	0.0255877	PF01593:Flavin containing amine oxidoreductase	Amino_oxidase
BnaC05g43370D	-7.81013	1.44496e-08	4.49673e-07	-4.68646	4.10482e-05	0.000820366	-8.00349	3.40438e-10	1.12559e-08	PF01593:Flavin containing amine oxidoreductase	Amino_oxidase
BnaC01g08790D	-4.61099	2.12099e-11	1.07137e-09	-4.20549	9.78457e-11	6.87421e-09	-3.14074	4.08784e-08	9.5052e-07	PF01593:Flavin containing amine oxidoreductase	Amino_oxidase
BnaC03g06000D	-1.94078	0.00152019	0.0169802	-1.61485	0.00261074	0.031504	-0.939421	0.00398899	0.02948	PF01593:Flavin containing amine oxidoreductase	Amino_oxidase
BnaA10g01010D	1.25972	0.00191203	0.0207048	1.4178	0.000831743	0.0117397	1.16745	3.41231e-05	0.000438773	PF01593:Flavin containing amine oxidoreductase	Amino_oxidase
BnaA05g28900D	2.36195	6.80661e-05	0.00107309	1.78365	0.01251	0.117236	1.90167	0.0214018	0.118722	PF01593:Flavin containing amine oxidoreductase	Amino_oxidase
BnaC01g04540D	-10.0384	1.56677e-14	1.3269e-12	-4.23288	0.000420037	0.00648993	-6.78805	2.63069e-18	2.5843e-16	PF01595:Domain of unknown function DUF21	-
BnaC07g44690D	1.81116	0.000653382	0.00809482	1.27547	0.0498932	0.342303	1.63247	2.64835e-11	1.03588e-09	PF01596:O-methyltransferase	-
BnaC01g07000D	-5.54186	0.00035988	0.00476465	-2.5244	0.0505578	0.345792	-4.5534	0.00332131	0.0251929	PF01602:Adaptin N terminal region	-
BnaC03g07260D	-5.12554	0.00198825	0.0214382	-4.27106	0.0411704	0.297896	-4.69095	0.00942751	0.0611251	PF01602:Adaptin N terminal region	-
BnaAnng37610D	5.52441	0.000548913	0.0069498	4.69214	0.00227467	0.0280108	4.82288	0.00640519	0.044324	PF01602:Adaptin N terminal region|PF09066:Beta2-adaptin appendage, C-terminal sub-domain|PF02883:Adaptin C-terminal domain	-
BnaA05g13880D	-8.32758	4.81732e-11	2.24977e-09	-5.12936	1.90841e-08	8.18007e-07	-5.60087	3.56605e-09	9.91513e-08	PF01603:Protein phosphatase 2A regulatory B subunit (B56 family)	-
BnaC05g43110D	-5.14079	1.11653e-24	4.06554e-22	-3.95741	1.11545e-10	7.67195e-09	-5.45027	1.60983e-28	3.9197e-26	PF01603:Protein phosphatase 2A regulatory B subunit (B56 family)	-
BnaC01g42510D	9.54948	1.46362e-14	1.24886e-12	7.64552	8.77569e-12	7.76033e-10	8.4519	3.85462e-12	1.73012e-10	PF01612:3'-5' exonuclease|PF00570:HRDC domain	3_5_exonuc
BnaA09g09450D	-1.05298	0.00078533	0.00953529	-1.02201	0.00872759	0.0875051	-0.94493	8.01026e-05	0.000944006	PF01625:Peptide methionine sulfoxide reductase	PMSR
BnaC07g25790D	-1.07392	0.000370311	0.00488755	-0.887654	0.00808994	0.08224	-0.969571	4.61276e-05	0.000573554	PF01627:Hpt domain	Hpt
BnaC06g35230D	1.24746	0.00401897	0.0393693	1.34844	0.00758599	0.0778657	0.709724	0.077437	0.308937	PF01633:Choline/ethanolamine kinase	Choline_kinase
BnaC01g13210D	-2.20853	0.000465069	0.00600323	-1.86036	0.00127636	0.0170554	-2.29034	1.08367e-07	2.3262e-06	PF01641:SelR domain	-
BnaC03g64610D	-1.84344	3.30076e-05	0.000552624	-1.21977	0.0894103	0.512932	-1.93031	6.03937e-10	1.91063e-08	PF01641:SelR domain	-
BnaA03g25580D	5.63287	3.40296e-10	1.39669e-08	4.97428	4.89688e-07	1.53217e-05	4.20622	2.37263e-10	8.0516e-09	PF01641:SelR domain	-
BnaA06g05070D	-2.926	8.02871e-12	4.33875e-10	-2.00883	0.000152293	0.00262981	-1.99329	1.07794e-07	2.31537e-06	PF01650:Peptidase C13 family	-
BnaC05g22580D	2.49426	2.57685e-05	0.000441188	2.1757	0.00180625	0.0229318	1.34773	0.00649295	0.0447813	PF01652:Eukaryotic initiation factor 4E	-
BnaC07g35030D	5.76364	0.000857371	0.0103144	4.54927	0.105582	0.570787	4.63334	0.0135188	0.0822783	PF01652:Eukaryotic initiation factor 4E	-
BnaA09g18000D	-3.37481	4.62604e-12	2.59894e-10	-2.98436	2.35996e-08	9.88736e-07	-3.40552	9.48484e-35	3.9916e-32	PF01655:Ribosomal protein L32	-
BnaC07g30410D	-1.08341	0.00049785	0.00636723	-1.07661	0.00110964	0.0150857	-1.59115	1.30568e-09	3.92026e-08	PF01656:CobQ/CobB/MinD/ParA nucleotide binding domain	CbiA
BnaA09g20400D	-1.39989	0.00209645	0.0224237	-1.25628	0.00997922	0.0976046	-1.64746	4.54086e-10	1.47138e-08	PF01657:Salt stress response/antifungal|PF00069:Protein kinase domain	Pkinase
BnaCnng53810D	3.96024	1.46655e-05	0.000263828	4.15368	3.88097e-05	0.000781081	2.05598	0.0401538	0.19311	PF01657:Salt stress response/antifungal|PF07714:Protein tyrosine kinase	Pkinase_Tyr
BnaA01g34710D	1.38576	0.000269108	0.003678	1.416	0.0332007	0.253808	1.60496	2.18314e-09	6.32815e-08	PF01658:Myo-inositol-1-phosphate synthase|PF07994:Myo-inositol-1-phosphate synthase	-
BnaC04g47280D	2.12468	6.18218e-13	4.03596e-11	2.1246	5.9081e-13	6.65485e-11	2.04217	9.26512e-20	1.03551e-17	PF01661:Macro domain|PF01357:Pollen allergen|PF01283:Ribosomal protein S26e|PF03330:Rare lipoprotein A (RlpA)-like double-psi beta-barrel	A1pp
BnaC01g08830D	-7.71795	4.82375e-09	1.61561e-07	-8.01926	5.12218e-10	3.07913e-08	-7.23932	7.12455e-09	1.88704e-07	PF01663:Type I phosphodiesterase / nucleotide pyrophosphatase	-
BnaC01g08820D	-6.51089	1.61353e-18	2.6347e-16	-5.40789	2.99601e-10	1.89475e-08	-5.05514	7.15136e-07	1.31842e-05	PF01663:Type I phosphodiesterase / nucleotide pyrophosphatase	-
BnaA09g02840D	2.95836	2.6813e-05	0.000457347	2.4151	2.36392e-08	9.89191e-07	2.54646	3.44509e-09	9.59839e-08	PF01667:Ribosomal protein S27	-
BnaC01g07710D	-10.7481	1.93653e-18	3.11726e-16	-7.02636	8.78711e-11	6.24366e-09	-6.80008	0.000118901	0.00135103	PF01679:Proteolipid membrane potential modulator	-
BnaC01g07700D	-9.22532	1.44995e-12	8.80716e-11	-7.03139	1.81403e-09	9.50498e-08	-7.22901	1.49447e-11	6.11568e-10	PF01679:Proteolipid membrane potential modulator	-
BnaC05g45940D	-9.0791	8.61995e-29	4.62158e-26	-5.9594	4.5169e-11	3.41802e-09	-7.35726	9.29133e-08	2.01734e-06	PF01679:Proteolipid membrane potential modulator	-
BnaC02g18240D	-3.03757	6.83423e-07	1.58604e-05	-2.60233	0.000434902	0.00668953	-2.87938	2.69204e-10	9.04101e-09	PF01679:Proteolipid membrane potential modulator	-
BnaA03g31390D	6.48081	8.31881e-07	1.9021e-05	7.21678	1.13904e-07	4.12131e-06	6.76131	1.35756e-07	2.86541e-06	PF01679:Proteolipid membrane potential modulator	-
BnaAnng00210D	-1.26191	5.97223e-06	0.00011579	-1.47819	0.000637004	0.00933629	-1.64155	3.07952e-14	1.84978e-12	PF01680:SOR/SNZ family	-
BnaC03g00280D	1.15805	0.000485597	0.00623159	1.428	0.00148649	0.0194435	0.861421	7.89356e-06	0.000117449	PF01680:SOR/SNZ family	-
BnaC04g15270D	1.2318	6.87447e-05	0.00108154	1.81356	0.000108359	0.00195109	1.23578	5.44014e-07	1.02427e-05	PF01694:Rhomboid family	Rhomboid
BnaA08g00890D	1.47011	3.35411e-06	6.80932e-05	1.40419	4.39358e-07	1.39181e-05	1.18031	7.07909e-09	1.87572e-07	PF01699:Sodium/calcium exchanger protein	Na_Ca_ex
BnaAnng25620D	-2.34859	8.07136e-11	3.63003e-09	-2.43626	9.16673e-12	8.07495e-10	-2.16856	1.335e-17	1.21353e-15	PF01704:UTP--glucose-1-phosphate uridylyltransferase	-
BnaC03g08340D	4.01934	9.57627e-16	1.01884e-13	3.46844	4.95448e-08	1.94194e-06	3.22802	1.30639e-40	8.09674e-38	PF01704:UTP--glucose-1-phosphate uridylyltransferase	-
BnaA04g16010D	2.40835	2.60532e-05	0.000445167	2.3403	7.65225e-06	0.000181556	2.3499	1.0626e-11	4.45259e-10	PF01715:IPP transferase	IPPT
BnaC01g30540D	-3.91405	2.41018e-17	3.27568e-15	-4.48229	1.55304e-11	1.29975e-09	-3.53585	3.12746e-11	1.21284e-09	PF01738:Dienelactone hydrolase family	-
BnaC04g28500D	-7.86129	3.51208e-09	1.20413e-07	-6.76375	1.84935e-07	6.40145e-06	-6.29955	1.25505e-06	2.20869e-05	PF01740:STAS domain|PF00916:Sulfate permease family	Sulfate_transp
BnaC05g08140D	5.10573	0.00298496	0.0303992	5.41012	0.00142704	0.0187515	4.73299	0.0100694	0.0646168	PF01743:Poly A polymerase head domain	-
BnaCnng69640D	-1.88645	2.68859e-11	1.32275e-09	-1.72679	4.6765e-05	0.000923074	-1.78474	1.80762e-11	7.27915e-10	PF01747:ATP-sulfurylase|PF14306:PUA-like domain	-
BnaC05g46090D	-7.0769	2.98733e-07	7.38598e-06	-5.67842	0.000118849	0.00211393	-5.76956	1.65335e-05	0.000227992	PF01749:Importin beta binding domain|PF00514:Armadillo/beta-catenin-like repeat|PF16186:Atypical Arm repeat	Arm
BnaC01g07250D	-3.05779	0.00140782	0.0158542	-7.06613	9.78757e-08	3.59628e-06	-4.33082	5.77368e-09	1.55584e-07	PF01751:Toprim domain|PF01131:DNA topoisomerase|PF01396:Topoisomerase DNA binding C4 zinc finger|PF13368:Topoisomerase C-terminal repeat	Topoisom_bac
BnaA01g05990D	0.834007	0.00148557	0.0166263	0.773775	0.0129468	0.120528	1.11368	5.22704e-05	0.000641856	PF01751:Toprim domain|PF01396:Topoisomerase DNA binding C4 zinc finger|PF13368:Topoisomerase C-terminal repeat|PF01131:DNA topoisomerase	Topoisom_bac
BnaC02g45710D	-1.76698	0.00344373	0.0344126	-2.50046	1.28903e-08	5.69942e-07	-2.18075	7.36705e-07	1.35523e-05	PF01753:MYND finger	zf-MYND
BnaC01g38560D	11.4443	2.40376e-24	8.52472e-22	7.96947	4.11146e-20	1.71211e-17	7.92234	0.000123011	0.00139262	PF01754:A20-like zinc finger|PF01428:AN1-like Zinc finger	zf-AN1
BnaA08g20120D	6.16138	5.83716e-06	0.000113392	7.49954	7.73526e-08	2.91547e-06	7.60262	3.23312e-09	9.03735e-08	PF01762:Galactosyltransferase|PF00337:Galactoside-binding lectin	Galactosyl_T
BnaC01g06350D	-3.77302	8.74857e-20	1.68753e-17	-3.31661	1.52155e-12	1.57417e-10	-4.0803	2.51604e-33	8.93405e-31	PF01762:Galactosyltransferase|PF13334:Domain of unknown function (DUF4094)	Galactosyl_T
BnaA01g04800D	8.21622	3.14343e-14	2.50566e-12	8.49768	6.2574e-15	1.05706e-12	6.45608	7.10792e-05	0.000846741	PF01762:Galactosyltransferase|PF13334:Domain of unknown function (DUF4094)	Galactosyl_T
BnaA04g05420D	-4.23766	3.93798e-07	9.51192e-06	-2.73752	0.00173002	0.0221112	-2.96958	3.75448e-11	1.4372e-09	PF01764:Lipase (class 3)	Lipase_3
BnaA08g27200D	-2.61488	1.08706e-09	4.08944e-08	-1.58334	0.031877	0.246153	-2.41142	4.9198e-05	0.00060818	PF01764:Lipase (class 3)	Lipase_3
BnaC04g17650D	-2.46151	9.1622e-12	4.89305e-10	-2.08126	0.0156889	0.140656	-1.95855	8.99538e-12	3.80912e-10	PF01764:Lipase (class 3)	Lipase_3
BnaC05g44540D	-2.18185	1.41267e-08	4.41037e-07	-1.99408	6.51408e-08	2.49767e-06	-1.9159	3.0298e-13	1.59015e-11	PF01764:Lipase (class 3)	Lipase_3
BnaA08g08850D	-1.70594	0.00482652	0.045919	-2.24391	0.00504878	0.0551513	-1.10799	0.0733148	0.297625	PF01764:Lipase (class 3)	Lipase_3
BnaA09g07600D	-1.47517	0.00420885	0.0408881	-1.20001	0.0799848	0.477846	-2.09104	2.84102e-06	4.65041e-05	PF01764:Lipase (class 3)	Lipase_3
BnaAnng08480D	-1.04724	0.00104281	0.012239	-1.43148	0.000182335	0.00308349	-1.46113	3.97316e-08	9.267e-07	PF01764:Lipase (class 3)	Lipase_3
BnaA10g28190D	1.86775	0.00364377	0.036199	1.24844	0.0864478	0.502216	0.904862	0.000107986	0.00123857	PF01764:Lipase (class 3)	Lipase_3
BnaC09g07540D	6.58749	3.35185e-06	6.80677e-05	5.8412	0.000149928	0.00259419	4.63781	2.85979e-05	0.000374221	PF01764:Lipase (class 3)	Lipase_3
BnaA03g27280D	-8.72064	3.97238e-12	2.25028e-10	-5.50171	2.23042e-08	9.40197e-07	-6.43673	6.90024e-16	5.10782e-14	PF01765:Ribosome recycling factor	-
BnaC01g09080D	-7.85939	4.10025e-36	4.73204e-33	-5.12411	1.49251e-10	9.99118e-09	-5.46131	3.43292e-31	1.03102e-28	PF01778:Ribosomal L28e protein family	-
BnaC05g45150D	-9.56963	9.22402e-15	8.24243e-13	-7.35141	3.08523e-19	1.10987e-16	-5.61747	1.02871e-05	0.00014884	PF01779:Ribosomal L29e protein family	-
BnaA05g30690D	1.02507	0.00281194	0.0288547	1.10394	1.56451e-05	0.000347327	1.079	7.99065e-07	1.45856e-05	PF01779:Ribosomal L29e protein family	-
BnaA03g29570D	2.19303	1.11324e-11	5.8898e-10	1.8949	1.4648e-13	1.9098e-11	2.03153	6.43326e-18	6.0663e-16	PF01779:Ribosomal L29e protein family	-
BnaA05g03330D	-3.7812	1.82335e-16	2.17052e-14	-3.37365	3.41093e-13	4.06179e-11	-3.29703	1.43218e-23	2.27599e-21	PF01781:Ribosomal L38e protein family	-
BnaA10g21490D	-1.28064	0.00296455	0.0302184	-1.29826	0.0017027	0.0218229	-0.909807	0.0121914	0.0754514	PF01795:MraW methylase family	-
BnaA08g00080D	-1.45018	5.92847e-07	1.39198e-05	-1.68026	0.000588661	0.008702	-1.5234	2.66927e-10	8.97781e-09	PF01798:snoRNA binding domain, fibrillarin|PF08156:NOP5NT (NUC127) domain	-
BnaA06g28960D	-1.25344	0.00428602	0.0415548	-1.40006	0.012491	0.117104	-1.16935	6.30676e-06	9.59539e-05	PF01798:snoRNA binding domain, fibrillarin|PF08156:NOP5NT (NUC127) domain	-
BnaC07g39720D	7.20211	7.68017e-08	2.12236e-06	5.85793	2.66879e-05	0.000561631	5.56026	1.61611e-06	2.78655e-05	PF01803:LIM-domain binding protein	-
BnaC09g44050D	-2.87165	2.1919e-09	7.75721e-08	-2.58471	8.41512e-11	5.99795e-09	-2.59993	7.34912e-08	1.63097e-06	PF01812:5-formyltetrahydrofolate cyclo-ligase family	-
BnaC03g44300D	-7.1119	1.44365e-07	3.78513e-06	-7.26456	2.55061e-06	6.73271e-05	-6.05223	5.81992e-05	0.000706767	PF01842:ACT domain	ACT
BnaAnng24140D	-1.5553	0.00514205	0.0484136	-2.0134	0.000145272	0.00252381	-1.66308	3.52004e-05	0.000450756	PF01842:ACT domain	ACT
BnaA06g13400D	6.38293	1.33953e-05	0.000243226	6.2188	2.22084e-05	0.000476559	5.20297	0.000223423	0.00237481	PF01842:ACT domain	ACT
BnaC03g40970D	1.92348	0.00236337	0.0248034	1.68375	0.0323297	0.249049	1.42323	0.0248205	0.133536	PF01842:ACT domain|PF00389:D-isomer specific 2-hydroxyacid dehydrogenase, catalytic domain|PF02826:D-isomer specific 2-hydroxyacid dehydrogenase, NAD binding domain	2-Hacid_dh_C
BnaCnng63540D	-8.46528	3.29152e-11	1.58503e-09	-5.23262	3.72492e-09	1.8466e-07	-7.36103	3.82937e-09	1.05825e-07	PF01843:DIL domain	DIL
BnaCnng51610D	-1.49675	1.49688e-05	0.000268787	-1.40237	3.31594e-05	0.000679911	-1.44555	3.57857e-06	5.75001e-05	PF01843:DIL domain|PF02736:Myosin N-terminal SH3-like domain|PF00063:Myosin head (motor domain)	Myosin_head
BnaC05g13840D	-0.934703	0.00161165	0.0178757	-0.772115	0.0213242	0.179645	-0.886248	1.32295e-06	2.31502e-05	PF01849:NAC domain	-
BnaA03g32240D	-0.919228	0.00523444	0.0491485	-0.793555	0.00121336	0.0162959	-0.725502	0.00214137	0.0172626	PF01849:NAC domain	-
BnaA06g00040D	-1.93159	3.91418e-05	0.000645016	-2.03308	3.8135e-06	9.62621e-05	-1.6569	0.000401018	0.00396804	PF01852:START domain	START
BnaA08g05340D	0.879906	0.000926766	0.0110477	1.22087	0.0069856	0.0727023	0.671459	0.00291017	0.0224973	PF01852:START domain	START
BnaC03g14700D	1.37173	0.000125706	0.00184789	1.37378	0.0129296	0.120395	0.809412	1.01352e-05	0.000146861	PF01852:START domain	START
BnaC03g36880D	2.1972	0.000161835	0.00232038	2.27718	0.000423989	0.00654364	1.67987	6.67341e-06	0.000100812	PF01852:START domain	START
BnaA03g32620D	2.33759	3.51167e-07	8.58884e-06	2.15491	4.42774e-05	0.000879024	2.47384	1.0828e-10	3.87038e-09	PF01852:START domain	START
BnaAnng30670D	-8.22773	1.19571e-19	2.24514e-17	-5.88794	9.50871e-16	1.86138e-13	-6.4304	5.10337e-08	1.17068e-06	PF01852:START domain|PF00046:Homeobox domain	START
BnaC06g34320D	1.46921	0.000293845	0.00398252	1.2671	0.000492742	0.00744914	1.64852	0.000215953	0.00230476	PF01852:START domain|PF00046:Homeobox domain	START
BnaA01g30730D	-1.47013	2.63657e-09	9.22542e-08	-1.4329	0.000231841	0.00381643	-1.45471	2.51127e-10	8.46726e-09	PF01858:Retinoblastoma-associated protein A domain|PF11934:Domain of unknown function (DUF3452)|PF01857:Retinoblastoma-associated protein B domain	-
BnaAnng37870D	-1.98324	3.99975e-10	1.62401e-08	-2.22668	6.58079e-11	4.80516e-09	-2.07888	1.94579e-23	3.0566e-21	PF01873:Domain found in IF2B/IF5	-
BnaA02g05130D	0.968979	0.000493173	0.00631809	0.675759	0.0593861	0.388648	0.794103	7.97529e-06	0.000118536	PF01873:Domain found in IF2B/IF5	-
BnaA05g04730D	-0.839109	0.00295185	0.0301115	-0.890127	0.00146989	0.0192484	-1.08245	8.41958e-05	0.000988655	PF01885:RNA 2'-phosphotransferase, Tpt1 / KptA family	-
BnaA06g01640D	-4.82372	3.86328e-12	2.1903e-10	-3.9311	3.18612e-16	6.86263e-14	-3.22755	9.95601e-12	4.18471e-10	PF01907:Ribosomal protein L37e	-
BnaA03g22850D	1.94334	1.56625e-06	3.3975e-05	1.97048	4.44901e-05	0.000882625	2.09441	2.70604e-19	2.91449e-17	PF01925:Sulfite exporter TauE/SafE	-
BnaC06g06010D	-2.75202	6.79907e-16	7.41915e-14	-2.85283	2.63217e-09	1.33671e-07	-2.48839	4.54968e-22	6.40012e-20	PF01926:50S ribosome-binding GTPase|PF08153:NGP1NT (NUC091) domain	-
BnaC07g40370D	-2.28003	9.40328e-09	3.01734e-07	-1.96222	2.47848e-11	1.99527e-09	-1.9959	9.44377e-18	8.73593e-16	PF01929:Ribosomal protein L14	-
BnaC01g31970D	-8.22139	1.28909e-10	5.61225e-09	-6.12779	6.74399e-09	3.14927e-07	-5.28251	1.17463e-11	4.89496e-10	PF01936:NYN domain	DUF88
BnaC07g35760D	-8.05041	4.32594e-10	1.73986e-08	-6.96083	9.76393e-08	3.59055e-06	-4.45676	2.35541e-06	3.91776e-05	PF01936:NYN domain	DUF88
BnaCnng36050D	-4.89194	9.22934e-05	0.00140621	-5.46644	4.4462e-06	0.000110488	-3.5756	7.00166e-05	0.000836127	PF01936:NYN domain	DUF88
BnaC05g18270D	-3.58895	7.00665e-19	1.22018e-16	-3.30479	1.79317e-06	4.92638e-05	-3.39781	1.85126e-16	1.46758e-14	PF01936:NYN domain	DUF88
BnaAnng09400D	-2.23107	0.000492267	0.00630886	-1.77518	0.0087975	0.0880776	-1.91018	0.00148133	0.0125175	PF01936:NYN domain	DUF88
BnaC03g47610D	-1.47666	6.68441e-05	0.00105481	-1.34682	0.00599359	0.0637986	-1.1374	0.000280763	0.002898	PF01937:Protein of unknown function DUF89	DUF89
BnaA09g20830D	-2.42707	1.87704e-13	1.31898e-11	-2.12938	1.61509e-11	1.34512e-09	-2.71694	1.44864e-15	1.03416e-13	PF01956:Integral membrane protein DUF106	-
BnaC01g05340D	-8.39284	3.37043e-11	1.61959e-09	-5.36561	1.90356e-08	8.16441e-07	-8.41789	1.78131e-11	7.1902e-10	PF01981:Peptidyl-tRNA hydrolase PTH2	PTH2
BnaA03g03070D	-4.39808	2.92431e-08	8.66113e-07	-5.06544	3.64124e-07	1.1735e-05	-6.08435	5.0113e-08	1.1515e-06	PF01981:Peptidyl-tRNA hydrolase PTH2	PTH2
BnaA08g04950D	1.56616	1.52585e-05	0.00027334	1.51548	0.00199869	0.0250269	1.18504	5.51114e-05	0.000673106	PF01985:CRS1 / YhbY (CRM) domain	-
BnaA01g26770D	2.77926	0.00437922	0.0423318	2.22449	0.0398012	0.289934	1.02454	0.106468	0.38031	PF01985:CRS1 / YhbY (CRM) domain	-
BnaC05g48770D	5.30701	0.00176176	0.0192924	5.65485	0.000350229	0.00552312	4.28633	0.00800488	0.0533637	PF01985:CRS1 / YhbY (CRM) domain	-
BnaA03g26090D	-1.6896	2.53193e-06	5.27062e-05	-1.83612	1.36617e-09	7.38551e-08	-2.01985	3.80531e-17	3.25509e-15	PF01990:ATP synthase (F/14-kDa) subunit	-
BnaA09g12020D	-2.37894	2.62406e-07	6.53835e-06	-2.29057	6.29264e-06	0.000151761	-2.29151	1.81795e-30	5.05879e-28	PF01991:ATP synthase (E/31 kDa) subunit	-
BnaC04g13920D	-7.861	6.72e-13	4.32079e-11	-5.63269	5.66682e-21	2.70394e-18	-6.64691	1.83558e-17	1.62522e-15	PF01997:Translin family	-
BnaA10g18460D	0.734137	0.00291504	0.0297941	0.688716	0.0148024	0.134214	0.677993	0.00130312	0.0111977	PF02005:N2,N2-dimethylguanosine tRNA methyltransferase	TRM
BnaC03g76340D	-1.7476	5.56554e-07	1.31174e-05	-1.9585	0.00242856	0.0296283	-2.11027	6.91925e-09	1.83694e-07	PF02037:SAP domain	SAP
BnaC09g07730D	3.31541	6.31362e-06	0.000121854	2.90976	0.00174227	0.0222429	2.62857	1.70173e-06	2.92092e-05	PF02037:SAP domain	SAP
BnaA08g16340D	1.27048	3.18504e-06	6.4932e-05	1.20327	0.0010191	0.0140274	1.44859	5.05178e-12	2.222e-10	PF02037:SAP domain|PF16294:RNSP1-SAP18 binding (RSB) motif	SAP
BnaA01g01880D	1.57931	3.09669e-05	0.000521664	1.30468	0.0352538	0.264817	1.03913	0.0129323	0.0792512	PF02042:RWP-RK domain	RWP-RK
BnaC01g04080D	-3.73796	3.11101e-24	1.09758e-21	-3.01746	2.69887e-13	3.32329e-11	-3.16398	1.31709e-25	2.49427e-23	PF02114:Phosducin	-
BnaA10g19440D	0.804308	0.00124579	0.0142951	0.773935	0.027636	0.220809	0.811276	4.50532e-05	0.000561629	PF02114:Phosducin	-
BnaC03g27790D	1.34457	4.63017e-08	1.32523e-06	1.19467	5.51634e-05	0.00106859	1.01609	2.49915e-10	8.43476e-09	PF02127:Aminopeptidase I zinc metalloprotease (M18)	Peptidase_M18
BnaC01g38120D	-8.04188	8.12211e-10	3.11398e-08	-4.65633	1.40423e-06	3.97218e-05	-8.21045	7.42559e-11	2.71446e-09	PF02135:TAZ zinc finger|PF08214:Histone acetylation protein	zf-TAZ
BnaC03g58210D	-2.07444	1.29525e-08	4.0662e-07	-1.72821	5.47779e-09	2.61193e-07	-2.01773	9.43086e-15	5.98101e-13	PF02136:Nuclear transport factor 2 (NTF2) domain	-
BnaAnng21720D	0.958834	0.000948106	0.0112705	1.43183	1.3117e-05	0.000296764	1.18213	8.95105e-08	1.9478e-06	PF02136:Nuclear transport factor 2 (NTF2) domain	-
BnaA03g22180D	-2.46932	1.66825e-07	4.31747e-06	-2.44549	2.14294e-06	5.76513e-05	-2.28869	6.21216e-17	5.19656e-15	PF02140:Galactose binding lectin domain|PF01301:Glycosyl hydrolases family 35	-
BnaA04g19060D	1.50396	2.55583e-06	5.3171e-05	1.42833	0.00309638	0.036449	1.48656	9.17536e-08	1.99343e-06	PF02140:Galactose binding lectin domain|PF01301:Glycosyl hydrolases family 35	-
BnaA06g03290D	-4.85764	1.52527e-07	3.97768e-06	-6.27621	3.29766e-08	1.33677e-06	-3.72319	4.06678e-07	7.87885e-06	PF02141:DENN (AEX-3) domain	DENN
BnaA04g29090D	-9.29417	1.35922e-13	9.77307e-12	-5.74125	3.23636e-08	1.31502e-06	-6.49382	1.93365e-12	9.10419e-11	PF02142:MGS-like domain	-
BnaC01g13850D	0.9885	0.00220866	0.0234106	0.694939	0.064834	0.413806	0.624271	0.00950494	0.0615627	PF02148:Zn-finger in ubiquitin-hydrolases and other protein|PF00443:Ubiquitin carboxyl-terminal hydrolase	UCH
BnaCnng29110D	-1.18656	4.18931e-05	0.000686864	-1.11425	0.000559202	0.00833104	-0.810496	2.97633e-05	0.000387315	PF02149:Kinase associated domain 1|PF00069:Protein kinase domain|PF00627:UBA/TS-N domain	Pkinase
BnaC05g46330D	-5.51008	0.000621044	0.00773646	-5.63421	0.00113742	0.0154146	-6.19351	1.32096e-05	0.000186493	PF02181:Formin Homology 2 Domain	FH2
BnaA03g20490D	3.17395	0.000467303	0.0060275	2.76343	0.00252873	0.0306652	3.86014	0.00012307	0.00139307	PF02181:Formin Homology 2 Domain	FH2
BnaA09g25140D	-1.66797	1.44744e-05	0.000260734	-1.47964	9.42063e-07	2.78525e-05	-1.62811	8.71708e-10	2.68912e-08	PF02181:Formin Homology 2 Domain|PF10409:C2 domain of PTEN tumour-suppressor protein	FH2
BnaUnng00320D	0.687112	0.00298905	0.0304363	0.655794	0.00430313	0.0483513	0.644154	0.000583624	0.00554012	PF02184:HAT (Half-A-TPR) repeat	-
BnaC05g48150D	-9.65868	7.01126e-15	6.42536e-13	-7.17908	1.24548e-14	1.98095e-12	-6.28688	1.40662e-16	1.13354e-14	PF02201:SWIB/MDM2 domain	-
BnaCnng65730D	-9.17692	1.63791e-13	1.16538e-11	-6.66594	4.15395e-12	3.95316e-10	-6.53602	3.02224e-16	2.34942e-14	PF02201:SWIB/MDM2 domain	-
BnaA01g02810D	1.04154	0.00387756	0.0381542	1.50272	5.70272e-05	0.0011019	1.65125	1.65425e-07	3.42796e-06	PF02201:SWIB/MDM2 domain	-
BnaA09g08750D	-1.40021	5.12763e-06	0.000100822	-1.26401	0.00100897	0.0139126	-1.11587	0.000129987	0.00146479	PF02201:SWIB/MDM2 domain|PF03126:Plus-3 domain	-
BnaA09g09480D	-1.14569	0.000191999	0.00270559	-1.33425	0.0227412	0.189216	-1.4969	7.2765e-08	1.61643e-06	PF02201:SWIB/MDM2 domain|PF05277:Protein of unknown function (DUF726)|PF02213:GYF domain	-
BnaAnng00320D	-7.99672	5.95898e-16	6.56558e-14	-6.30453	7.65982e-15	1.28367e-12	-5.5647	1.01119e-23	1.6375e-21	PF02207:Putative zinc finger in N-recognin (UBR box)	zf-UBR1
BnaA03g10330D	-3.15152	0.00250154	0.0260527	-2.32881	0.000413885	0.00640929	-1.087	0.266204	0.643549	PF02209:Villin headpiece domain|PF00626:Gelsolin repeat	-
BnaA04g01330D	1.50391	0.00363608	0.0361384	1.51377	0.00111653	0.0151675	0.914664	0.0385647	0.187384	PF02212:Dynamin GTPase effector domain|PF00350:Dynamin family|PF01031:Dynamin central region	-
BnaCnng24220D	-3.66737	5.58807e-16	6.19702e-14	-3.69502	4.75776e-13	5.43033e-11	-4.29947	1.16956e-15	8.43767e-14	PF02214:BTB/POZ domain	K_tetra
BnaA05g29300D	0.979276	0.00478507	0.0455884	1.6687	1.29259e-05	0.000292729	0.953798	0.000900496	0.00808005	PF02214:BTB/POZ domain	K_tetra
BnaC03g71640D	-2.42106	7.82131e-12	4.23676e-10	-2.41615	2.53203e-09	1.29254e-07	-2.4861	4.66468e-16	3.55726e-14	PF02214:BTB/POZ domain|PF00805:Pentapeptide repeats (8 copies)	K_tetra
BnaA07g18600D	-1.07568	2.57905e-05	0.000441453	-1.08378	0.0025606	0.0309806	-1.28949	1.80921e-15	1.27554e-13	PF02219:Methylenetetrahydrofolate reductase	-
BnaAnng01700D	-7.2397	8.71245e-08	2.38632e-06	-5.60188	0.000337471	0.00534401	-5.14758	0.00285602	0.0221389	PF02221:ML domain	-
BnaA08g09050D	-2.1745	0.00396375	0.0388898	-1.49073	0.0516915	0.351795	-1.89546	1.02348e-05	0.000148146	PF02221:ML domain	-
BnaCnng62970D	1.21199	0.00341075	0.0341331	1.14682	0.0242462	0.199325	1.32082	7.3682e-07	1.35523e-05	PF02221:ML domain	-
BnaC03g20870D	-1.6293	2.30407e-05	0.000398797	-2.14741	2.01833e-07	6.92705e-06	-1.39435	4.69702e-05	0.000582968	PF02222:ATP-grasp domain|PF00731:AIR carboxylase	-
BnaA01g29630D	-1.21954	8.07015e-06	0.000152725	-0.860464	0.0144879	0.131745	-1.0481	1.93965e-08	4.74822e-07	PF02225:PA domain|PF00082:Subtilase family|PF05922:Peptidase inhibitor I9	Peptidase_S8
BnaC01g37240D	11.3676	1.53817e-26	6.75715e-24	9.63549	4.97127e-41	3.41576e-37	6.66508	0.00549796	0.0388988	PF02225:PA domain|PF00082:Subtilase family|PF05922:Peptidase inhibitor I9	Peptidase_S8
BnaA03g57130D	-1.7721	1.41978e-08	4.42649e-07	-1.11154	0.000913419	0.0127356	-1.16291	0.000432514	0.00424335	PF02225:PA domain|PF13639:Ring finger domain	-
BnaAnng05920D	8.39407	2.69088e-10	1.11722e-08	6.90851	3.20307e-07	1.04752e-05	7.49866	2.57254e-09	7.34445e-08	PF02229:Transcriptional Coactivator p15 (PC4)	-
BnaA03g57470D	1.5027	5.61552e-07	1.32215e-05	1.3834	0.0686713	0.430669	1.13287	0.000897843	0.00806155	PF02230:Phospholipase/Carboxylesterase	Abhydrolase_2
BnaA06g37540D	-2.61416	0.00275705	0.028341	-3.97489	0.0120518	0.113779	-2.64085	0.0038338	0.0285217	PF02234:Cyclin-dependent kinase inhibitor	-
BnaC03g64400D	-3.17942	2.08566e-15	2.09153e-13	-3.16324	1.08341e-16	2.47479e-14	-3.09139	7.115e-17	5.90831e-15	PF02238:Cytochrome c oxidase subunit VIIa	-
BnaA01g11000D	-1.2952	0.000257897	0.00354256	-1.01288	0.0208476	0.176213	-0.953118	0.0145577	0.0873204	PF02238:Cytochrome c oxidase subunit VIIa	-
BnaA10g00210D	-1.61696	0.000356096	0.00472558	-1.76797	4.28861e-06	0.000106842	-1.56265	1.1413e-13	6.33109e-12	PF02254:TrkA-N domain|PF00999:Sodium/hydrogen exchanger family	Na_H_Exchanger
BnaC01g40730D	-3.90019	3.10005e-11	1.50883e-09	-3.04488	5.76343e-07	1.77506e-05	-3.26277	8.28161e-11	3.01284e-09	PF02260:FATC domain|PF00454:Phosphatidylinositol 3- and 4-kinase|PF02259:FAT domain	PI3_PI4_kinase
BnaA10g01290D	-2.68362	1.05324e-05	0.000194987	-3.45575	7.32336e-08	2.77562e-06	-2.55807	2.27184e-06	3.79434e-05	PF02269:Transcription initiation factor IID, 18kD subunit	-
BnaC01g06030D	-11.0072	4.18996e-18	6.44014e-16	-6.6236	2.7297e-25	2.60497e-22	-7.05606	5.57667e-05	0.000680135	PF02271:Ubiquinol-cytochrome C reductase complex 14kD subunit	-
BnaA01g04540D	1.25986	0.00180307	0.019694	1.14507	0.00351497	0.0406521	1.20705	7.82825e-08	1.72495e-06	PF02271:Ubiquinol-cytochrome C reductase complex 14kD subunit	-
BnaC04g49120D	1.46724	0.00233059	0.024535	1.27531	0.000694635	0.010065	1.00172	0.00019946	0.00214858	PF02290:Signal recognition particle 14kD protein	-
BnaC07g41190D	-3.6606	4.02413e-22	1.10487e-19	-3.38429	1.09947e-18	3.49745e-16	-3.76198	1.32755e-30	3.77113e-28	PF02297:Cytochrome oxidase c subunit VIb	-
BnaC05g17740D	-0.704598	0.00452266	0.0435391	-0.603094	0.0499902	0.342797	-0.65062	0.00358019	0.0268725	PF02297:Cytochrome oxidase c subunit VIb	-
BnaC01g06600D	-8.44403	3.20802e-10	1.31986e-08	-7.61657	2.29557e-08	9.65291e-07	-7.75259	3.69402e-10	1.21195e-08	PF02298:Plastocyanin-like domain	Cu_bind_like
BnaA05g04320D	2.42187	6.09687e-07	1.42906e-05	2.50793	9.83542e-13	1.05428e-10	1.64649	1.8626e-05	0.000254121	PF02298:Plastocyanin-like domain	Cu_bind_like
BnaA10g15190D	2.65873	1.25223e-09	4.64409e-08	2.54503	0.00366359	0.0421227	1.62707	2.15067e-06	3.61232e-05	PF02298:Plastocyanin-like domain	Cu_bind_like
BnaA04g18680D	3.51674	0.000497476	0.00636364	3.44498	0.000358863	0.00564762	3.75521	1.08884e-13	6.06478e-12	PF02298:Plastocyanin-like domain	Cu_bind_like
BnaA01g33260D	4.35699	3.08496e-05	0.000519817	6.69395	2.88164e-06	7.50842e-05	5.35101	8.41374e-06	0.000124294	PF02298:Plastocyanin-like domain	Cu_bind_like
BnaC06g26770D	5.15686	0.00371551	0.0368096	5.06213	0.000456836	0.00697692	2.80739	0.00757696	0.0509786	PF02301:HORMA domain	HORMA
BnaA09g07160D	-1.77626	1.68017e-07	4.34337e-06	-1.41279	0.00524512	0.056979	-1.50662	1.95669e-14	1.20396e-12	PF02309:AUX/IAA family	-
BnaC09g03870D	-1.77046	0.000112951	0.0016806	-1.07364	0.0648699	0.413853	-1.28601	0.00237803	0.0189022	PF02309:AUX/IAA family	-
BnaC03g43120D	1.40942	0.00128739	0.0147049	0.875315	0.220069	0.852798	0.915097	0.00564606	0.0397776	PF02309:AUX/IAA family	-
BnaA10g02680D	3.52124	0.00444033	0.0428435	4.24492	5.7375e-05	0.00110737	4.68325	6.5253e-06	9.89037e-05	PF02309:AUX/IAA family	-
BnaCnng57860D	7.75494	6.75534e-36	7.6663e-33	10.0612	3.74311e-19	1.31219e-16	6.00228	0.005999	0.0419217	PF02309:AUX/IAA family	-
BnaA03g54820D	-2.55177	0.000340379	0.00453823	-2.39909	3.03685e-06	7.87106e-05	-2.78715	0.000629087	0.00590346	PF02319:E2F/DP family winged-helix DNA-binding domain|PF08781:Transcription factor DP	E2F_TDP
BnaC03g10520D	-2.16297	6.83332e-05	0.00107681	-1.82496	0.00326105	0.0381066	-1.73445	0.00142253	0.0120986	PF02325:YGGT family	-
BnaC01g05870D	-7.81801	5.08382e-10	2.02434e-08	-4.71439	6.34208e-10	3.72767e-08	-6.5333	3.21116e-13	1.68015e-11	PF02330:Mitochondrial glycoprotein	-
BnaC01g05640D	-7.49719	9.81538e-09	3.13186e-07	-6.16076	2.18989e-05	0.0004708	-4.4893	3.61905e-08	8.508e-07	PF02330:Mitochondrial glycoprotein	-
BnaA01g04430D	1.04173	0.00114022	0.0132287	1.04312	0.00156033	0.0202666	1.12055	3.06138e-05	0.000397094	PF02330:Mitochondrial glycoprotein	-
BnaA06g02640D	-1.14952	0.00147103	0.0164796	-1.46719	9.7253e-05	0.00177531	-1.27722	7.36082e-11	2.69367e-09	PF02338:OTU-like cysteine protease	OTU
BnaC03g42630D	4.78027	4.74385e-09	1.59198e-07	5.2532	2.76239e-10	1.75744e-08	2.64629	0.00864077	0.0568568	PF02338:OTU-like cysteine protease	OTU
BnaA09g07560D	-1.23092	0.000688777	0.00848092	-1.17647	0.00897506	0.0894771	-1.82765	6.60243e-08	1.48068e-06	PF02338:OTU-like cysteine protease|PF02810:SEC-C motif	OTU
BnaA02g04520D	1.25308	8.94005e-05	0.00136785	1.17926	0.0203346	0.172813	0.853954	0.00403269	0.0297546	PF02341:RbcX protein|PF04398:Protein of unknown function, DUF538	-
BnaA01g03860D	0.76112	0.000921765	0.0109919	0.604156	0.0905353	0.516412	0.836379	4.05137e-05	0.000511683	PF02347:Glycine cleavage system P-protein	-
BnaC01g05130D	-5.82814	2.74664e-13	1.87961e-11	-4.61059	4.1e-14	5.94327e-12	-4.81898	4.88762e-20	5.67664e-18	PF02353:Mycolic acid cyclopropane synthetase	-
BnaA03g52340D	-2.19751	0.00440033	0.0425178	-1.43728	0.114817	0.601628	-0.940117	0.22787	0.593991	PF02353:Mycolic acid cyclopropane synthetase	-
BnaC03g42190D	-5.80767	9.82539e-07	2.22192e-05	-3.38875	6.08252e-08	2.34266e-06	-4.24311	1.54868e-09	4.59655e-08	PF02361:Cobalt transport protein	-
BnaA08g30700D	-3.24014	0.000547355	0.00693395	-3.13806	0.0192483	0.16534	-3.23666	0.0104157	0.0664204	PF02362:B3 DNA binding domain	B3
BnaA09g07640D	-2.84404	0.00090278	0.0107863	-2.51258	0.0011274	0.0152909	-3.12761	3.65492e-05	0.000466189	PF02362:B3 DNA binding domain	B3
BnaC07g12370D	5.1659	0.00186973	0.0203049	6.85256	5.42894e-05	0.00105344	2.64247	0.0191412	0.108648	PF02362:B3 DNA binding domain	B3
BnaA06g14090D	6.13662	2.27338e-05	0.000393885	1.63195	0.193862	0.807827	0.655768	0.632879	0.897628	PF02362:B3 DNA binding domain	B3
BnaC09g07580D	6.94484	3.52685e-06	7.11757e-05	7.29828	1.67197e-06	4.63604e-05	6.67739	2.31846e-06	3.86369e-05	PF02362:B3 DNA binding domain	B3
BnaA01g34850D	8.55144	2.48688e-11	1.23523e-09	7.71553	4.81202e-09	2.32513e-07	7.90835	9.46691e-10	2.90075e-08	PF02362:B3 DNA binding domain	B3
BnaC01g08330D	-2.80429	2.31582e-08	6.99274e-07	-3.40903	5.09666e-11	3.8023e-09	-3.87972	2.4115e-12	1.11841e-10	PF02362:B3 DNA binding domain|PF06507:Auxin response factor	Auxin_resp
BnaC03g25860D	-4.25041	1.13426e-08	3.58889e-07	-1.466	0.0384364	0.282239	-2.21576	0.000309139	0.00315224	PF02362:B3 DNA binding domain|PF06507:Auxin response factor|PF02309:AUX/IAA family	Auxin_resp
BnaA09g05840D	-1.30461	0.00415166	0.0404479	-1.25927	0.00763213	0.0782827	-1.37562	9.59923e-07	1.7222e-05	PF02362:B3 DNA binding domain|PF06507:Auxin response factor|PF02309:AUX/IAA family	Auxin_resp
BnaA04g17550D	3.72328	3.71491e-13	2.50457e-11	3.33092	6.75933e-05	0.00128616	3.20331	1.83606e-13	9.86411e-12	PF02362:B3 DNA binding domain|PF07496:CW-type Zinc Finger	B3
BnaC05g44800D	-1.65374	5.86364e-09	1.9344e-07	-1.55942	0.000434401	0.00668426	-1.74078	8.77051e-18	8.13522e-16	PF02364:1,3-beta-glucan synthase component	-
BnaA04g24740D	-7.85888	1.81786e-09	6.56658e-08	-4.32551	0.000594648	0.00878484	-7.43226	1.46534e-08	3.67282e-07	PF02365:No apical meristem (NAM) protein	NAM
BnaC05g47490D	-7.49427	2.35509e-08	7.08931e-07	-4.06503	0.000171517	0.00291837	-5.79716	2.10478e-05	0.00028314	PF02365:No apical meristem (NAM) protein	NAM
BnaC05g47500D	-7.48018	1.92558e-08	5.87696e-07	-3.29278	0.000760629	0.0108542	-4.49775	2.97618e-05	0.000387315	PF02365:No apical meristem (NAM) protein	NAM
BnaA09g02500D	-3.3537	0.00169473	0.0186815	-4.51803	0.00239244	0.0292343	-3.81451	0.00226259	0.0181177	PF02365:No apical meristem (NAM) protein	NAM
BnaCnng06310D	-3.32085	4.87704e-05	0.000790108	-3.15706	0.0119716	0.113192	-4.56317	0.000591153	0.00560068	PF02365:No apical meristem (NAM) protein	NAM
BnaA02g33910D	-1.95181	1.01984e-05	0.000189216	-1.78761	0.00267845	0.032208	-1.66025	1.21386e-05	0.000172625	PF02365:No apical meristem (NAM) protein	NAM
BnaAnng17650D	-1.94532	5.70604e-06	0.000111104	-2.5161	3.40761e-07	1.10703e-05	-2.31172	2.74124e-11	1.06976e-09	PF02365:No apical meristem (NAM) protein	NAM
BnaA05g32430D	2.41223	0.00257294	0.0267145	1.62012	0.0753226	0.458976	2.13657	0.00137642	0.0117504	PF02365:No apical meristem (NAM) protein	NAM
BnaA03g19960D	4.96303	0.000606475	0.00757715	3.69259	NA	1	2.60789	0.00829028	0.0549429	PF02365:No apical meristem (NAM) protein|PF03479:Domain of unknown function (DUF296)	NAM
BnaC05g44330D	-3.56331	9.15512e-14	6.87301e-12	-3.10056	7.50254e-12	6.73855e-10	-2.96123	4.48316e-23	6.853e-21	PF02373:JmjC domain, hydroxylase	JmjC
BnaC01g20420D	4.89708	8.40781e-13	5.31073e-11	3.47454	4.30989e-05	0.000857858	4.28945	6.77193e-19	7.07019e-17	PF02374:Anion-transporting ATPase	-
BnaC04g30920D	6.81612	1.62194e-06	3.50565e-05	5.18718	0.000321941	0.00512644	6.09696	2.76868e-05	0.000363275	PF02374:Anion-transporting ATPase	-
BnaC03g72230D	6.69363	3.59283e-07	8.76843e-06	7.85723	3.48242e-09	1.73641e-07	7.69834	3.30634e-09	9.23226e-08	PF02375:jmjN domain|PF02373:JmjC domain, hydroxylase|PF02928:C5HC2 zinc finger	JmjC
BnaA09g08140D	-1.21303	2.58616e-06	5.3752e-05	-1.11642	4.50058e-05	0.000891681	-1.10814	1.44714e-08	3.63121e-07	PF02383:SacI homology domain|PF01465:GRIP domain	-
BnaA09g22560D	-5.31402	0.00298466	0.0303992	-2.4915	0.16109	0.73423	-1.08236	0.348629	0.729754	PF02386:Cation transport protein	-
BnaA10g17070D	-3.32937	0.0012926	0.0147493	-1.52244	0.147419	0.698312	-1.88363	0.0235211	0.127894	PF02390:Putative methyltransferase	-
BnaC01g04060D	-7.22516	3.39745e-07	8.33943e-06	-3.60777	0.00102498	0.0140965	-6.98659	3.86172e-07	7.5179e-06	PF02401:LytB protein	-
BnaAnng37160D	-2.55721	0.00460203	0.0441325	-2.54112	0.0128178	0.119575	-3.14312	0.00153905	0.0129269	PF02431:Chalcone-flavanone isomerase	-
BnaC05g47870D	-5.99269	1.01521e-14	9.01263e-13	-4.34163	8.71447e-08	3.2366e-06	-4.2196	4.41808e-12	1.95589e-10	PF02450:Lecithin:cholesterol acyltransferase	-
BnaA09g21920D	-4.15228	0.00370892	0.0367551	-5.52423	6.09371e-05	0.00117151	-4.21827	7.0886e-05	0.000844882	PF02453:Reticulon	-
BnaC04g00900D	1.59931	2.61644e-09	9.15968e-08	1.44977	0.00483252	0.0532034	1.04587	1.42437e-07	2.98885e-06	PF02453:Reticulon	-
BnaC01g38700D	2.21673	4.51777e-11	2.11759e-09	2.16536	2.19864e-14	3.3772e-12	1.86869	9.11563e-07	1.64406e-05	PF02453:Reticulon	-
BnaAnng32210D	-9.6651	1.39563e-10	6.049e-09	-5.02173	0.000127099	0.0022448	-6.88875	8.45333e-08	1.84894e-06	PF02458:Transferase family	-
BnaC06g31590D	-8.01301	2.11149e-17	2.91039e-15	-5.22442	2.58163e-06	6.79632e-05	-6.83115	2.64788e-32	8.63741e-30	PF02458:Transferase family	-
BnaCnng70090D	-7.19712	0.00130074	0.0148281	-4.79704	NA	1	-5.33807	4.31467e-06	6.80446e-05	PF02458:Transferase family	-
BnaC02g38050D	-6.60547	1.69169e-06	3.63947e-05	-6.68375	2.90626e-06	7.56397e-05	-7.08978	1.44944e-07	3.03678e-06	PF02458:Transferase family	-
BnaAnng13950D	-3.70007	2.90972e-25	1.13865e-22	-3.40306	3.66536e-19	1.29152e-16	-3.7873	2.45346e-48	3.41361e-45	PF02458:Transferase family	-
BnaC06g31570D	1.81222	0.00264331	0.027312	2.31484	7.47416e-05	0.00140698	2.8136	9.14773e-07	1.64814e-05	PF02458:Transferase family	-
BnaC04g26140D	4.2462	1.87526e-14	1.5515e-12	5.00715	9.28455e-12	8.16826e-10	4.18456	3.54106e-14	2.10109e-12	PF02463:RecF/RecN/SMC N terminal domain	SMC_N
BnaC03g14170D	1.65651	0.000938525	0.0111703	2.83732	2.43132e-06	6.44259e-05	1.73956	0.000383514	0.00381144	PF02466:Tim17/Tim22/Tim23/Pmp24 family	-
BnaA06g27130D	2.41591	0.000517276	0.00658475	2.07244	0.00870254	0.0872972	1.09843	0.349194	0.730167	PF02466:Tim17/Tim22/Tim23/Pmp24 family	-
BnaC06g41260D	-8.35449	1.02848e-10	4.55925e-09	-3.68524	0.000561728	0.00835961	-4.21015	2.41488e-10	8.17869e-09	PF02485:Core-2/I-Branching enzyme	-
BnaC07g50350D	-7.99393	7.05579e-10	2.7313e-08	-5.02333	7.1357e-07	2.15893e-05	-5.19981	1.72172e-09	5.06823e-08	PF02485:Core-2/I-Branching enzyme	-
BnaC01g07150D	-7.06865	6.07575e-13	3.97792e-11	-6.7271	4.67151e-13	5.34966e-11	-6.34739	1.77097e-17	1.57416e-15	PF02485:Core-2/I-Branching enzyme	-
BnaC04g27720D	-5.40781	0.00251129	0.0261422	-5.04936	0.00386224	0.0441334	-4.08921	0.0103412	0.0660102	PF02492:CobW/HypB/UreG, nucleotide-binding domain	-
BnaC03g05980D	-3.76127	0.00457067	0.0439201	-3.8183	0.0036599	0.0420874	-3.48132	0.0543176	0.241579	PF02514:CobN/Magnesium Chelatase|PF11965:Domain of unknown function (DUF3479)	-
BnaA08g24050D	-2.67781	0.00399311	0.0391441	-2.3604	0.00131305	0.0174811	-2.26052	0.00692236	0.0472553	PF02517:CAAX protease self-immunity	-
BnaC03g20020D	1.9547	9.64833e-05	0.00146346	1.42714	0.00302648	0.0357732	1.38181	0.00106793	0.00939494	PF02517:CAAX protease self-immunity	-
BnaC05g44190D	-2.88606	0.000628042	0.00781506	-5.38329	3.21715e-07	1.05012e-05	-3.76317	6.70653e-07	1.24415e-05	PF02518:Histidine kinase-, DNA gyrase B-, and HSP90-like ATPase|PF00183:Hsp90 protein	HATPase_c
BnaC01g07200D	-6.63659	1.38314e-06	3.03706e-05	-5.05564	0.000155995	0.00268833	-7.08296	2.03733e-07	4.1531e-06	PF02519:Auxin responsive protein	Auxin_inducible
BnaA07g23070D	-2.21536	7.54995e-05	0.001174	-1.76836	0.021213	0.178818	-3.1406	3.00464e-06	4.90292e-05	PF02519:Auxin responsive protein	Auxin_inducible
BnaA04g01170D	1.87445	0.00408117	0.0398753	1.95356	0.028183	0.224075	0.792794	0.0156765	0.0925816	PF02519:Auxin responsive protein	Auxin_inducible
BnaA01g02430D	2.70692	6.85162e-05	0.00107944	2.0222	1.54902e-07	5.46091e-06	1.1415	0.00895878	0.0585838	PF02519:Auxin responsive protein	Auxin_inducible
BnaC05g43900D	-7.54066	2.07233e-23	6.75153e-21	-5.59696	6.70305e-10	3.91638e-08	-5.49603	3.66453e-07	7.16674e-06	PF02535:ZIP Zinc transporter	-
BnaC01g05220D	-7.16825	4.05246e-06	8.08012e-05	-2.88394	0.0013966	0.0184044	-6.47025	5.26368e-06	8.15954e-05	PF02535:ZIP Zinc transporter	-
BnaA08g08320D	-3.77659	0.00480068	0.0457108	-3.93266	0.00875445	0.0877616	-4.48847	0.0150794	0.0897157	PF02535:ZIP Zinc transporter	-
BnaA05g29570D	1.67172	2.48075e-06	5.17198e-05	1.42365	2.77143e-07	9.1904e-06	1.13064	1.51164e-07	3.15644e-06	PF02535:ZIP Zinc transporter	-
BnaC01g39390D	3.41811	5.0776e-06	9.98668e-05	2.36437	4.82341e-07	1.51263e-05	1.92181	0.000126991	0.00143364	PF02535:ZIP Zinc transporter	-
BnaC05g46230D	-7.76061	3.58247e-08	1.04023e-06	-7.89736	6.64209e-09	3.11096e-07	-5.33503	5.08258e-08	1.16631e-06	PF02536:mTERF	-
BnaA09g01200D	-1.84949	3.89699e-05	0.00064296	-1.70117	0.000358735	0.00564689	-2.04146	7.87536e-06	0.000117229	PF02536:mTERF	-
BnaC09g30580D	1.46293	0.00013808	0.00201026	0.89169	0.178575	0.774801	0.869358	0.0587495	0.254936	PF02536:mTERF	-
BnaC04g19840D	5.29989	0.0025508	0.0265211	5.55899	0.000414241	0.00641337	5.5971	0.000758603	0.00696828	PF02536:mTERF	-
BnaC07g05630D	-7.4583	1.94766e-08	5.939e-07	-7.77344	4.99346e-09	2.40435e-07	-8.0261	2.36141e-10	8.02148e-09	PF02544:3-oxo-5-alpha-steroid 4-dehydrogenase	-
BnaA09g08770D	-2.78473	1.68401e-05	0.000299389	-2.46646	7.28007e-05	0.00137702	-2.23797	1.407e-07	2.95605e-06	PF02544:3-oxo-5-alpha-steroid 4-dehydrogenase	-
BnaA09g07850D	-2.60943	7.3167e-10	2.82587e-08	-2.5797	1.10673e-06	3.2113e-05	-1.67751	1.30587e-09	3.92026e-08	PF02545:Maf-like protein	Maf
BnaC09g08000D	4.80551	7.9411e-05	0.00122695	4.44858	0.00189385	0.0239028	3.88699	0.00124325	0.0107481	PF02545:Maf-like protein	Maf
BnaC04g23230D	3.38308	1.54929e-09	5.64736e-08	3.25285	0.000125757	0.0022247	3.43851	6.53929e-10	2.06044e-08	PF02567:Phenazine biosynthesis-like protein	-
BnaA08g12980D	-1.94015	0.000191097	0.00269343	-1.55294	0.0352637	0.264863	-1.92242	2.03594e-06	3.43486e-05	PF02575:YbaB/EbfC DNA-binding family	-
BnaA10g15810D	1.84888	0.000122979	0.00181055	0.874322	0.199149	0.816767	2.22083	5.1948e-09	1.40807e-07	PF02598:Putative RNA methyltransferase	-
BnaC02g37820D	1.32906	5.19685e-05	0.000837734	1.97046	0.0178456	0.155665	1.10495	5.68023e-05	0.000691265	PF02622:Uncharacterized ACR, COG1678	-
BnaCnng24160D	-2.37132	0.00101138	0.0119104	-2.64072	7.83154e-05	0.00146503	-2.40878	6.74459e-11	2.48015e-09	PF02630:SCO1/SenC	-
BnaCnng14450D	-2.21335	0.00110487	0.0128756	-1.60102	0.0203577	0.172944	-2.25309	0.00316515	0.024167	PF02666:Phosphatidylserine decarboxylase	-
BnaA06g22280D	-1.16697	0.00116352	0.0134622	-0.705472	0.128369	0.643343	-1.08457	2.72398e-06	4.47386e-05	PF02670:1-deoxy-D-xylulose 5-phosphate reductoisomerase|PF13288:DXP reductoisomerase C-terminal domain|PF08436:1-deoxy-D-xylulose 5-phosphate reductoisomerase C-terminal	-
BnaC03g42210D	-6.32782	9.17551e-06	0.000171971	-6.78928	3.07301e-06	7.95578e-05	-7.4416	1.4983e-08	3.74579e-07	PF02681:Divergent PAP2 family	-
BnaC01g38600D	5.78972	0.000128693	0.00188732	6.26217	0.000360483	0.00566922	6.54924	2.81842e-06	4.61453e-05	PF02681:Divergent PAP2 family	-
BnaC03g66850D	2.00093	5.4026e-06	0.00010577	2.98742	7.31662e-08	2.77562e-06	3.23819	2.13221e-11	8.46132e-10	PF02686:Glu-tRNAGln amidotransferase C subunit	-
BnaC01g35450D	-1.273	0.00183235	0.0199722	-1.53002	0.000126016	0.00222872	-1.20601	0.00160015	0.0133773	PF02689:Helicase|PF05970:PIF1-like helicase	-
BnaC03g06850D	1.39442	0.00407398	0.0398222	1.13121	0.0041646	0.0470718	0.864115	0.00783849	0.0524258	PF02704:Gibberellin regulated protein	-
BnaC01g04660D	-4.65999	6.66009e-31	4.53492e-28	-4.78501	8.38079e-18	2.30338e-15	-3.70387	9.66121e-22	1.31733e-19	PF02705:K+ potassium transporter	K_trans
BnaC03g03790D	1.03965	0.00200941	0.0216252	1.11813	0.00702735	0.0730704	0.9498	0.00931074	0.0605349	PF02705:K+ potassium transporter	K_trans
BnaC05g50890D	-5.02924	1.24027e-06	2.74945e-05	-6.16623	6.62424e-08	2.53708e-06	-7.62832	2.33725e-09	6.72907e-08	PF02713:Domain of unknown function DUF220	-
BnaCnng28390D	-5.88264	1.07261e-05	0.000198088	-3.35797	9.48034e-05	0.00173474	-2.40926	0.00146628	0.012415	PF02721:Domain of unknown function DUF223	-
BnaCnng31330D	-5.56257	0.000406262	0.00532283	-5.48543	0.000715743	0.0103187	-3.44174	0.0158826	0.09358	PF02721:Domain of unknown function DUF223	-
BnaC04g55400D	6.886	6.98436e-12	3.80154e-10	9.32696	3.89498e-13	4.54371e-11	6.61334	1.62498e-12	7.72555e-11	PF02721:Domain of unknown function DUF223	-
BnaA03g53590D	-5.59118	0.0003414	0.00454829	-5.21852	0.00429418	0.0482764	-5.37115	0.000712138	0.00658047	PF02721:Domain of unknown function DUF223|PF08646:Replication factor-A C terminal domain	-
BnaAnng36880D	6.79208	1.45493e-07	3.80882e-06	7.38483	4.32569e-08	1.71505e-06	8.05344	5.29012e-10	1.69483e-08	PF02721:Domain of unknown function DUF223|PF16900:Replication protein A OB domain	-
BnaC05g45090D	-1.45406	9.1349e-06	0.000171257	-1.63368	1.63621e-05	0.000361841	-1.28478	1.12462e-06	1.99252e-05	PF02770:Acyl-CoA dehydrogenase, middle domain|PF00441:Acyl-CoA dehydrogenase, C-terminal domain|PF02771:Acyl-CoA dehydrogenase, N-terminal domain|PF01636:Phosphotransferase enzyme family	APH
BnaC04g00410D	1.66897	0.00342967	0.0342972	1.4237	0.00283438	0.0338248	1.88614	6.50854e-08	1.46396e-06	PF02772:S-adenosylmethionine synthetase, central domain|PF02773:S-adenosylmethionine synthetase, C-terminal domain|PF00438:S-adenosylmethionine synthetase, N-terminal domain	-
BnaA05g00770D	1.91342	0.000455726	0.00590388	2.00769	6.10441e-05	0.00117291	1.98929	8.51476e-09	2.23098e-07	PF02773:S-adenosylmethionine synthetase, C-terminal domain|PF00438:S-adenosylmethionine synthetase, N-terminal domain|PF02772:S-adenosylmethionine synthetase, central domain	-
BnaC08g27300D	8.09343	4.75437e-10	1.90318e-08	7.79747	2.34403e-06	6.23533e-05	7.05033	3.27757e-07	6.46374e-06	PF02777:Iron/manganese superoxide dismutases, C-terminal domain|PF00081:Iron/manganese superoxide dismutases, alpha-hairpin domain	-
BnaA06g24700D	-2.54078	1.98639e-10	8.39051e-09	-2.50019	1.16636e-08	5.20055e-07	-2.5482	6.52577e-16	4.8649e-14	PF02779:Transketolase, pyrimidine binding domain|PF00676:Dehydrogenase E1 component|PF16870:2-oxoglutarate dehydrogenase C-terminal	-
BnaC03g42170D	-6.15915	1.14544e-09	4.27836e-08	-4.91757	1.71192e-08	7.40719e-07	-6.03527	2.10594e-18	2.09598e-16	PF02780:Transketolase, C-terminal domain|PF02779:Transketolase, pyrimidine binding domain|PF13292:1-deoxy-D-xylulose-5-phosphate synthase	-
BnaA07g15160D	2.20541	1.56969e-08	4.85165e-07	2.14979	0.0105833	0.102477	1.85149	6.10409e-10	1.92931e-08	PF02781:Glucose-6-phosphate dehydrogenase, C-terminal domain|PF00479:Glucose-6-phosphate dehydrogenase, NAD binding domain	G6PD_C
BnaC03g05110D	-10.2574	7.11546e-17	8.92263e-15	-7.28022	1.29432e-16	2.91584e-14	-5.61748	0.00450363	0.0327649	PF02784:Pyridoxal-dependent decarboxylase, pyridoxal binding domain|PF00278:Pyridoxal-dependent decarboxylase, C-terminal sheet domain	-
BnaC09g44330D	5.61213	0.000772817	0.00940517	5.315	0.0028224	0.0337088	6.12114	2.20489e-05	0.000295558	PF02791:DDT domain|PF00628:PHD-finger	DDT
BnaCnng06300D	-9.36926	2.42598e-13	1.67533e-11	-4.81206	1.65848e-09	8.78596e-08	-5.77188	5.56194e-11	2.06762e-09	PF02798:Glutathione S-transferase, N-terminal domain|PF00043:Glutathione S-transferase, C-terminal domain	GST_N
BnaC03g47720D	2.23498	0.00128078	0.0146448	3.0361	1.13797e-06	3.29221e-05	3.77698	9.99621e-13	4.91483e-11	PF02798:Glutathione S-transferase, N-terminal domain|PF00043:Glutathione S-transferase, C-terminal domain	GST_N
BnaA07g20590D	-5.9736	9.29933e-06	0.000173908	-6.97706	5.28285e-07	1.64321e-05	-6.8323	1.77336e-06	3.03236e-05	PF02798:Glutathione S-transferase, N-terminal domain|PF13410:Glutathione S-transferase, C-terminal domain	GST_N
BnaA06g10900D	-1.83288	1.23903e-10	5.41855e-09	-1.6354	3.45151e-07	1.11994e-05	-1.84739	3.96484e-11	1.51179e-09	PF02800:Glyceraldehyde 3-phosphate dehydrogenase, C-terminal domain|PF00044:Glyceraldehyde 3-phosphate dehydrogenase, NAD binding domain	-
BnaC02g32230D	5.17089	5.65219e-14	4.33405e-12	5.40046	1.67264e-23	1.20976e-20	4.98493	2.26228e-27	5.0403e-25	PF02801:Beta-ketoacyl synthase, C-terminal domain|PF00109:Beta-ketoacyl synthase, N-terminal domain	ketoacyl-synt
BnaC07g26300D	1.64978	2.45197e-07	6.15e-06	1.42106	1.3056e-06	3.71768e-05	1.547	1.55704e-11	6.34884e-10	PF02803:Thiolase, C-terminal domain|PF00108:Thiolase, N-terminal domain	Thiolase_N
BnaC09g07490D	3.94477	2.58046e-07	6.44793e-06	3.15761	1.82573e-05	0.000399381	3.21909	5.12745e-08	1.17566e-06	PF02810:SEC-C motif|PF02338:OTU-like cysteine protease	OTU
BnaA03g29700D	-2.29004	0.00440006	0.0425178	-1.58099	0.0556573	0.370779	-2.0944	1.43909e-05	0.000201379	PF02817:e3 binding domain|PF00364:Biotin-requiring enzyme|PF00198:2-oxoacid dehydrogenases acyltransferase (catalytic domain)	Biotin_lipoyl
BnaAnng07210D	-1.20712	1.79755e-06	3.84655e-05	-1.32368	3.96053e-08	1.58122e-06	-1.26593	1.27049e-10	4.47863e-09	PF02823:ATP synthase, Delta/Epsilon chain, beta-sandwich domain	-
BnaC01g00410D	-8.9231	1.57103e-16	1.88999e-14	-6.32599	7.61221e-23	5.07801e-20	-7.30589	1.58572e-07	3.30258e-06	PF02824:TGS domain|PF16897:C-terminal region of MMR_HSR1 domain|PF01926:50S ribosome-binding GTPase	-
BnaA01g05530D	1.13674	2.44861e-06	5.10654e-05	0.876498	0.000677136	0.00984677	1.02451	2.50229e-06	4.13723e-05	PF02824:TGS domain|PF16897:C-terminal region of MMR_HSR1 domain|PF01926:50S ribosome-binding GTPase	-
BnaC02g48600D	-1.31046	0.00412928	0.0402703	-1.42242	0.00033879	0.00536118	-1.67569	4.50747e-07	8.67102e-06	PF02845:CUE domain	CUE
BnaC03g58120D	-0.943618	0.00182881	0.0199497	-1.02692	0.00764527	0.0783922	-1.22356	1.18085e-09	3.56851e-08	PF02845:CUE domain	CUE
BnaC01g16380D	9.98238	6.60344e-15	6.10917e-13	8.93502	1.29259e-12	1.35185e-10	6.20969	3.73015e-06	5.96964e-05	PF02845:CUE domain	CUE
BnaC06g40100D	-1.69436	7.02898e-10	2.72402e-08	-1.75029	6.68924e-08	2.55627e-06	-1.46626	2.13637e-11	8.4729e-10	PF02847:MA3 domain	-
BnaC05g04680D	7.07594	3.2582e-08	9.55856e-07	5.30242	7.82124e-08	2.93981e-06	7.73707	4.25877e-09	1.16887e-07	PF02847:MA3 domain	-
BnaA01g06460D	1.77948	5.14297e-06	0.000101094	1.53017	0.000405897	0.00629836	2.24004	3.67099e-22	5.20318e-20	PF02847:MA3 domain|PF02854:MIF4G domain	-
BnaC01g07660D	-3.52891	7.49096e-13	4.75808e-11	-3.36128	7.67547e-11	5.53391e-09	-3.26778	1.86165e-24	3.18894e-22	PF02854:MIF4G domain|PF02847:MA3 domain	-
BnaC04g35330D	0.923922	0.000645989	0.00801495	0.955909	0.0112931	0.108071	0.789632	1.3179e-05	0.0001861	PF02866:lactate/malate dehydrogenase, alpha/beta C-terminal domain|PF00056:lactate/malate dehydrogenase, NAD binding domain	-
BnaCnng29330D	1.06959	7.20512e-05	0.00112705	0.965559	0.00922732	0.0914085	0.752298	4.76351e-05	0.000590575	PF02866:lactate/malate dehydrogenase, alpha/beta C-terminal domain|PF00056:lactate/malate dehydrogenase, NAD binding domain	-
BnaA02g03650D	0.959544	0.00230338	0.0242786	0.740595	0.00813036	0.0825775	0.885212	1.57025e-05	0.000217987	PF02880:Phosphoglucomutase/phosphomannomutase, alpha/beta/alpha domain III|PF02878:Phosphoglucomutase/phosphomannomutase, alpha/beta/alpha domain I|PF02879:Phosphoglucomutase/phosphomannomutase, alpha/beta/alpha domain II	PGM_PMM_II
BnaA05g17060D	-4.12507	0.00279166	0.0286735	-2.75401	0.0491501	0.339106	-5.04009	0.000397201	0.00393427	PF02881:SRP54-type protein, helical bundle domain|PF00448:SRP54-type protein, GTPase domain	-
BnaA10g00550D	6.69993	3.05359e-06	6.24953e-05	6.0457	1.00577e-05	0.000233217	6.47617	7.82896e-06	0.000116641	PF02887:Pyruvate kinase, alpha/beta domain	PK_C
BnaA03g02560D	-1.13676	4.68316e-05	0.000759965	-1.12751	0.0121116	0.114163	-1.00586	0.00038261	0.00380356	PF02887:Pyruvate kinase, alpha/beta domain|PF00224:Pyruvate kinase, barrel domain	PK
BnaA07g15410D	-1.32877	2.11417e-05	0.000369402	-1.40093	1.7635e-05	0.000387125	-1.34788	9.73202e-06	0.000141439	PF02891:MIZ/SP-RING zinc finger	zf-MIZ
BnaA04g11220D	3.02134	5.06189e-05	0.000817721	2.06428	0.00656718	0.0689218	2.56342	1.08754e-06	1.93134e-05	PF02891:MIZ/SP-RING zinc finger	zf-MIZ
BnaC02g47850D	5.03749	0.00414067	0.040364	3.31934	0.194792	1	4.20586	0.038889	0.188651	PF02892:BED zinc finger	zf-BED
BnaA08g29410D	7.44815	9.62097e-09	3.07848e-07	7.67325	1.87889e-09	9.82485e-08	6.27366	3.56481e-08	8.39208e-07	PF02892:BED zinc finger|PF04937:Protein of unknown function (DUF 659)	DUF659
BnaC01g27340D	7.28861	1.42453e-07	3.74076e-06	6.54996	1.07806e-06	3.13738e-05	6.28362	1.94849e-06	3.29955e-05	PF02892:BED zinc finger|PF05699:hAT family C-terminal dimerisation region	hATC
BnaC07g02370D	-5.59457	0.000656117	0.00812137	-6.2581	4.99924e-05	0.000979184	-5.61674	0.000274556	0.00284211	PF02902:Ulp1 protease family, C-terminal catalytic domain	Peptidase_C48
BnaC01g41380D	1.84446	0.00532319	0.0498502	1.33979	0.0759013	0.46168	2.1986	0.000408782	0.00403549	PF02902:Ulp1 protease family, C-terminal catalytic domain	Peptidase_C48
BnaC04g11360D	6.48184	2.42228e-06	5.05627e-05	5.89348	4.15588e-07	1.32506e-05	6.98059	4.0053e-08	9.33876e-07	PF02902:Ulp1 protease family, C-terminal catalytic domain	Peptidase_C48
BnaC06g00820D	6.53714	0.000161429	0.00231587	5.85674	0.000882078	0.0123689	3.52222	0.204247	1	PF02902:Ulp1 protease family, C-terminal catalytic domain	Peptidase_C48
BnaC09g41160D	-7.16221	5.03953e-07	1.19605e-05	-6.60699	3.51982e-06	8.97725e-05	-6.14661	2.02228e-05	0.000273277	PF02902:Ulp1 protease family, C-terminal catalytic domain|PF09331:Domain of unknown function (DUF1985)	Peptidase_C48
BnaA09g44480D	-5.11537	0.00347502	0.0346896	-3.9622	0.059473	0.388957	-3.40814	0.224952	1	PF02902:Ulp1 protease family, C-terminal catalytic domain|PF09331:Domain of unknown function (DUF1985)	Peptidase_C48
BnaA03g04330D	1.02695	7.72923e-05	0.00119829	0.987283	4.82255e-05	0.000949177	1.04538	4.38728e-08	1.01461e-06	PF02921:Ubiquinol cytochrome reductase transmembrane region|PF00355:Rieske [2Fe-2S] domain	-
BnaA10g20290D	-1.05412	0.00508141	0.0479288	-0.999975	0.000551125	0.00822498	-0.915919	0.00121554	0.0105339	PF02926:THUMP domain	-
BnaC03g30040D	-2.2433	4.57227e-14	3.53785e-12	-2.15556	2.43344e-15	4.35421e-13	-2.21883	2.0524e-14	1.26058e-12	PF02933:Cell division protein 48 (CDC48), domain 2|PF00004:ATPase family associated with various cellular activities (AAA)	AAA
BnaA03g55720D	-4.24996	1.03876e-05	0.00019262	-2.18782	0.000191317	0.00321601	-3.70088	2.31788e-08	5.5819e-07	PF02941:Ferredoxin thioredoxin reductase variable alpha chain	-
BnaA04g09900D	-1.57843	0.000476381	0.00612771	-1.33113	0.00144557	0.0189551	-0.613742	0.06795	0.282257	PF02943:Ferredoxin thioredoxin reductase catalytic beta chain	-
BnaA07g21840D	-2.30108	0.00466518	0.0445876	-2.67983	6.47213e-06	0.000155816	-2.05961	3.05087e-05	0.000395807	PF02953:Tim10/DDP family zinc finger	-
BnaA06g09990D	-6.36451	1.23926e-06	2.74862e-05	-2.99671	0.0157079	0.140789	-4.59752	0.000179759	0.0019577	PF02978:Signal peptide binding domain|PF00448:SRP54-type protein, GTPase domain|PF02881:SRP54-type protein, helical bundle domain	-
BnaC02g02830D	-3.68118	0.000469306	0.00604875	-2.23396	0.0563215	0.374043	-1.59887	0.0762771	0.305736	PF02978:Signal peptide binding domain|PF02881:SRP54-type protein, helical bundle domain|PF00448:SRP54-type protein, GTPase domain	-
BnaA01g00430D	1.5852	0.000240866	0.00333214	1.88385	0.000598997	0.00884338	2.16745	3.93047e-10	1.28582e-08	PF02984:Cyclin, C-terminal domain|PF00134:Cyclin, N-terminal domain	Cyclin_C
BnaA10g15380D	-0.696132	0.00173488	0.0190471	-1.01862	0.00468314	0.0519165	-0.689512	1.98938e-05	0.000269263	PF02985:HEAT repeat|PF13646:HEAT repeats	HEAT
BnaC05g10860D	-1.43016	0.00278515	0.0286168	-0.970711	0.0294024	0.231493	-1.62657	0.000297288	0.0030446	PF02990:Endomembrane protein 70	-
BnaCnng27350D	-0.735342	0.00425222	0.0412506	-0.819744	0.0037458	0.0429888	-0.857288	4.0861e-06	6.47245e-05	PF02990:Endomembrane protein 70	-
BnaA09g07350D	-1.8622	0.00022696	0.00315902	-1.59115	1.65345e-07	5.79044e-06	-2.04511	4.37044e-14	2.56419e-12	PF03000:NPH3 family|PF00651:BTB/POZ domain	BTB
BnaA01g05040D	2.87048	3.70903e-20	7.62995e-18	2.84869	2.83028e-05	0.000591155	2.35515	3.43111e-28	8.01094e-26	PF03000:NPH3 family|PF00651:BTB/POZ domain	BTB
BnaC01g01330D	-9.23129	3.5574e-15	3.41165e-13	-5.08749	9.27002e-05	0.0017026	-8.47411	2.67021e-21	3.52798e-19	PF03006:Haemolysin-III related	-
BnaC07g46700D	-1.12447	0.000944144	0.0112293	-1.60249	5.41432e-05	0.0010509	-1.53203	6.32277e-06	9.61118e-05	PF03006:Haemolysin-III related	-
BnaA01g00320D	2.03879	5.60631e-06	0.000109287	1.94192	0.000135203	0.00236803	1.47571	3.85682e-05	0.000489104	PF03006:Haemolysin-III related	-
BnaA07g22350D	1.61447	0.00030992	0.00417463	0.869734	0.0119053	0.112767	1.12291	0.00416127	0.0305809	PF03009:Glycerophosphoryl diester phosphodiesterase family	-
BnaC05g14440D	-5.46961	4.90269e-06	9.65662e-05	-5.02403	3.65454e-05	0.000740499	-7.03957	1.134e-07	2.42591e-06	PF03016:Exostosin family	-
BnaC05g48110D	-5.21238	0.00114801	0.0133076	-5.04676	0.000615453	0.00905325	-5.54832	0.000292876	0.003008	PF03016:Exostosin family	-
BnaC03g08100D	-4.02793	2.18571e-12	1.28966e-10	-2.79884	4.18255e-14	6.05017e-12	-2.88514	2.73617e-15	1.86541e-13	PF03016:Exostosin family	-
BnaC01g39770D	-2.77671	0.000363305	0.0048071	-1.97481	0.000844731	0.0119084	-1.21936	0.00157523	0.0131852	PF03016:Exostosin family	-
BnaA06g27910D	-1.5762	0.000685406	0.00844859	-1.25337	0.000713736	0.010294	-1.27971	0.000322423	0.0032696	PF03016:Exostosin family	-
BnaA10g15500D	-1.40499	0.000797323	0.00966367	-0.819039	0.0450155	0.31867	-0.747132	0.0180026	0.103722	PF03016:Exostosin family	-
BnaA01g00100D	0.767396	0.00334821	0.033601	1.04348	0.00217794	0.0269341	1.34607	4.54101e-12	2.00603e-10	PF03016:Exostosin family	-
BnaA02g03300D	1.01571	0.00410193	0.0400379	0.910279	0.00956436	0.0942446	0.682524	0.0495767	0.226007	PF03016:Exostosin family	-
BnaC03g57690D	2.90249	1.49271e-05	0.000268109	2.16259	0.00428623	0.0482087	3.24851	6.28478e-10	1.98366e-08	PF03016:Exostosin family	-
BnaA10g17600D	3.10032	4.14909e-10	1.67765e-08	3.54189	1.02583e-06	3.0019e-05	3.72169	7.90864e-19	8.19422e-17	PF03016:Exostosin family	-
BnaAnng31440D	3.65914	8.02764e-06	0.000152047	3.50398	4.56318e-06	0.000113068	3.49828	0.000298143	0.00305152	PF03016:Exostosin family	-
BnaA04g16600D	3.38614	1.14209e-07	3.05805e-06	4.0987	1.57459e-05	0.000349339	4.10909	3.94605e-44	3.31275e-41	PF03018:Dirigent-like protein	-
BnaC04g13570D	-1.49144	0.000172207	0.00245308	-1.09191	0.00569818	0.061204	-1.61846	6.81495e-07	1.26151e-05	PF03029:Conserved hypothetical ATP binding protein	-
BnaC04g08760D	-4.73487	0.000263233	0.00360712	-2.58831	0.0211925	0.178689	-5.72528	0.000295369	0.00302859	PF03031:NLI interacting factor-like phosphatase	NIF
BnaA06g35990D	-2.62965	2.83012e-12	1.63448e-10	-2.38636	0.000122137	0.00216681	-2.59722	2.25609e-12	1.05134e-10	PF03031:NLI interacting factor-like phosphatase	NIF
BnaA07g16690D	-1.0078	0.00255014	0.0265182	-1.03526	0.0036246	0.0417372	-0.829794	0.00418891	0.0307475	PF03031:NLI interacting factor-like phosphatase	NIF
BnaC01g07350D	-7.62372	4.10194e-08	1.183e-06	-7.46691	1.03231e-07	3.77488e-06	-5.80591	2.60755e-05	0.000344386	PF03040:CemA family	-
BnaA06g29800D	2.44885	5.93419e-08	1.67384e-06	3.13627	6.93662e-10	4.03228e-08	2.16638	4.6131e-11	1.74143e-09	PF03061:Thioesterase superfamily	4HBT
BnaC01g01360D	-5.69832	0.000633467	0.0078725	-5.87111	8.8655e-05	0.00163442	-4.50975	0.0166241	0.097201	PF03069:Acetamidase/Formamidase family	FmdA_AmdA
BnaA01g00380D	-3.61654	4.11773e-07	9.92144e-06	-2.12985	0.0290246	0.229241	-1.04885	0.128004	0.428206	PF03069:Acetamidase/Formamidase family	FmdA_AmdA
BnaA01g00390D	2.51327	3.84855e-05	0.000635894	2.27015	8.13298e-07	2.43918e-05	1.99471	8.6194e-06	0.000126919	PF03069:Acetamidase/Formamidase family	FmdA_AmdA
BnaC01g06910D	-8.40319	5.08535e-11	2.36037e-09	-4.42949	0.000198186	0.00332203	-6.8179	1.02272e-07	2.20718e-06	PF03081:Exo70 exocyst complex subunit	Exo70
BnaA06g04270D	-5.2217	0.0020918	0.022381	-5.54176	0.000422688	0.00652503	-4.228	0.044333	0.207828	PF03081:Exo70 exocyst complex subunit	Exo70
BnaA01g34780D	1.09506	0.000320545	0.00430413	1.02369	0.0113565	0.108556	1.26343	0.000350148	0.00351624	PF03081:Exo70 exocyst complex subunit	Exo70
BnaA02g01450D	-2.91643	0.000582509	0.00731235	-3.14804	4.37429e-06	0.000108858	-1.29741	0.108241	0.384343	PF03083:Sugar efflux transporter for intercellular exchange	-
BnaA10g06010D	1.64201	0.00241585	0.0252762	2.84039	0.00492502	0.0540227	2.59849	0.000529053	0.0050701	PF03083:Sugar efflux transporter for intercellular exchange	-
BnaC01g02970D	-6.63143	5.06856e-06	9.97178e-05	-5.36887	0.00137213	0.018141	-4.89467	0.00947443	0.0613943	PF03087:Arabidopsis protein of unknown function	-
BnaC03g62430D	5.96273	0.00032908	0.00440744	4.9797	0.00246836	0.0300498	2.3639	0.0354934	0.175706	PF03087:Arabidopsis protein of unknown function	-
BnaA06g04880D	-0.876256	0.00236138	0.0247886	-0.894445	0.017044	0.150141	-0.782574	0.00718752	0.0487385	PF03088:Strictosidine synthase	Str_synth
BnaA10g14270D	1.23291	0.00130329	0.0148523	0.897593	0.0403205	0.293136	0.879533	0.0110191	0.0695141	PF03088:Strictosidine synthase	Str_synth
BnaC04g39030D	1.99014	0.000896045	0.0107134	1.07212	0.131268	0.652303	2.24674	1.52524e-05	0.000212127	PF03088:Strictosidine synthase	Str_synth
BnaC01g23420D	4.74551	0.000614359	0.00766019	2.60514	0.0624856	0.403173	4.02723	0.000442471	0.00432858	PF03088:Strictosidine synthase	Str_synth
BnaC01g23410D	7.46189	4.91576e-07	1.1679e-05	7.47032	2.58052e-08	1.07199e-06	5.81916	4.90423e-07	9.32899e-06	PF03088:Strictosidine synthase	Str_synth
BnaCnng04240D	1.75096	0.000958577	0.0113786	1.63752	0.0479946	0.334002	1.15381	0.0321206	0.16279	PF03094:Mlo family	-
BnaA06g06970D	3.88501	5.20354e-10	2.06477e-08	3.90953	7.3863e-13	8.10723e-11	3.78701	4.85113e-33	1.66196e-30	PF03094:Mlo family	-
BnaC04g06890D	-6.35652	1.11883e-05	0.000205676	-5.33393	0.000947875	0.0131679	-6.17633	1.94339e-05	0.000263667	PF03096:Ndr family	Ndr
BnaC09g38630D	-4.86054	0.0046508	0.044496	-5.18165	0.00171498	0.0219394	-5.26527	0.0010653	0.00937742	PF03096:Ndr family	Ndr
BnaA06g12190D	-1.39877	0.000729699	0.00892989	-1.31665	0.00182721	0.0231425	-0.71273	0.0203108	0.113868	PF03097:BRO1-like domain	-
BnaC06g34480D	2.83152	9.39312e-05	0.00142765	3.00101	8.10417e-05	0.00150823	2.16076	0.000862029	0.00778612	PF03098:Animal haem peroxidase	An_peroxidase
BnaA06g06290D	4.31549	1.55504e-05	0.000278423	3.86612	0.00024568	0.00401826	4.56806	0.000238822	0.00251458	PF03098:Animal haem peroxidase	An_peroxidase
BnaC01g07340D	-5.49094	0.000775748	0.00943578	-4.40327	0.00405281	0.046005	-3.74179	0.0348115	0.173247	PF03099:Biotin/lipoate A/B protein ligase family|PF00847:AP2 domain	AP2
BnaA07g18370D	4.81796	9.33221e-05	0.00141871	3.25802	0.0069675	0.0725448	3.78846	0.00151717	0.0127668	PF03101:FAR1 DNA-binding domain	FAR1
BnaA02g04730D	2.64274	0.000534958	0.00679333	1.41535	0.101588	0.556771	1.13153	0.034248	0.171004	PF03105:SPX domain	SPX
BnaA03g22680D	3.84104	1.13347e-16	1.39313e-14	3.78693	5.13372e-06	0.000125933	3.09291	1.03779e-16	8.48351e-15	PF03105:SPX domain	SPX
BnaA09g19200D	-1.66791	0.0046854	0.044739	-2.01409	4.76124e-05	0.000938184	-1.25383	1.51133e-08	3.77699e-07	PF03105:SPX domain|PF03124:EXS family	SPX
BnaA09g45890D	5.52874	0.000780361	0.00948342	1.76497	0.0801458	0.478413	2.98588	0.0573523	0.250693	PF03105:SPX domain|PF03124:EXS family	SPX
BnaC01g06660D	-9.03329	7.53631e-13	4.78243e-11	-6.43377	1.72697e-08	7.46288e-07	-7.8519	1.45231e-09	4.32937e-08	PF03106:WRKY DNA -binding domain	WRKY
BnaA08g24160D	-2.41628	2.09212e-07	5.32541e-06	-3.08771	1.08751e-05	0.00025041	-2.05997	3.43663e-06	5.54809e-05	PF03106:WRKY DNA -binding domain	WRKY
BnaC03g16740D	1.68196	0.0005081	0.00648006	1.4836	0.0101619	0.0990532	0.792764	0.00865643	0.0569433	PF03106:WRKY DNA -binding domain	WRKY
BnaA08g12810D	1.69247	2.41805e-06	5.04899e-05	1.86332	0.000585075	0.00865645	1.81569	7.79845e-08	1.71949e-06	PF03106:WRKY DNA -binding domain	WRKY
BnaA08g08590D	4.00157	4.04892e-05	0.000665448	4.93939	0.0497716	0.34181	4.99265	0.000142315	0.00159083	PF03106:WRKY DNA -binding domain	WRKY
BnaC07g25890D	5.38135	0.000797539	0.00966457	4.91693	0.0123724	0.116231	4.23791	0.0327856	0.165301	PF03106:WRKY DNA -binding domain	WRKY
BnaC04g35770D	1.11046	0.00176052	0.019285	1.19176	0.0189641	0.163327	1.34243	7.30072e-08	1.62128e-06	PF03106:WRKY DNA -binding domain|PF10533:Plant zinc cluster domain	WRKY
BnaA02g03800D	-2.3057	0.000575219	0.00722895	-1.73264	0.0143291	0.130614	-1.77062	0.000807474	0.00735869	PF03107:C1 domain	-
BnaA09g00810D	-7.74533	8.78362e-08	2.40388e-06	-6.46565	8.45413e-07	2.52338e-05	-5.57422	6.35087e-09	1.69795e-07	PF03107:C1 domain|PF07649:C1-like domain	C1_3
BnaC01g08750D	-5.84786	9.99795e-05	0.00151182	-6.36788	1.3636e-05	0.000307492	-5.00019	0.000593714	0.00562065	PF03107:C1 domain|PF07649:C1-like domain	C1_3
BnaCnng05230D	2.26367	9.05882e-05	0.00138363	2.55256	0.000112238	0.00201091	4.22176	2.16393e-09	6.27511e-08	PF03107:C1 domain|PF07649:C1-like domain	C1_3
BnaCnng23340D	2.45305	0.00138253	0.0156142	2.39073	0.0138983	0.127524	2.04508	0.0241063	0.130444	PF03107:C1 domain|PF07649:C1-like domain	C1_3
BnaCnng33300D	8.07033	1.84565e-10	7.86928e-09	9.03928	5.6241e-10	3.34863e-08	7.47093	5.73068e-09	1.54486e-07	PF03107:C1 domain|PF07649:C1-like domain	C1_3
BnaC01g07110D	-1.6625	2.06332e-06	4.36315e-05	-1.77792	9.34377e-06	0.000218074	-2.45766	1.76638e-13	9.51971e-12	PF03109:ABC1 family	ABC1
BnaA06g08940D	2.20041	2.2525e-08	6.81971e-07	2.36327	0.0136331	0.125584	1.95883	4.39585e-23	6.73465e-21	PF03124:EXS family|PF03105:SPX domain	SPX
BnaA08g19850D	3.03921	0.000301413	0.00407374	2.74576	2.19302e-05	0.000471178	1.6255	0.0157128	0.0927639	PF03124:EXS family|PF03105:SPX domain	SPX
BnaCnng18930D	-1.17129	0.000121134	0.00178809	-0.749488	0.0408548	0.296017	-1.30993	2.53163e-08	6.07305e-07	PF03126:Plus-3 domain	-
BnaC03g66920D	-2.13134	2.32086e-06	4.85647e-05	-2.06866	1.57802e-07	5.55176e-06	-1.99883	3.06815e-13	1.60903e-11	PF03127:GAT domain|PF00790:VHS domain	-
BnaC03g08090D	-1.14878	2.39577e-05	0.000412571	-1.37388	1.55788e-07	5.48408e-06	-1.34824	4.58777e-13	2.35876e-11	PF03127:GAT domain|PF00790:VHS domain	-
BnaA01g04200D	1.07047	0.000133666	0.00195478	1.10938	3.01119e-05	0.000624695	1.18348	7.44574e-12	3.19258e-10	PF03127:GAT domain|PF00790:VHS domain	-
BnaAnng34440D	-8.79038	5.11169e-12	2.8471e-10	-5.75614	1.37954e-13	1.80948e-11	-6.17657	2.14169e-17	1.87435e-15	PF03140:Plant protein of unknown function	-
BnaA09g04570D	-2.27529	0.000313991	0.00422446	-3.2599	0.000668028	0.0097308	-2.38463	0.00021573	0.00230339	PF03140:Plant protein of unknown function	-
BnaC03g10870D	1.66896	0.00114966	0.0133222	0.763427	0.197641	0.813751	0.904057	0.0325137	0.164367	PF03140:Plant protein of unknown function	-
BnaA09g25240D	2.12687	0.00468693	0.0447473	1.63539	0.00950942	0.0937704	1.61738	0.0115088	0.071951	PF03140:Plant protein of unknown function	-
BnaC05g46400D	-6.68305	1.00152e-06	2.26034e-05	-7.24887	9.19254e-08	3.39645e-06	-5.41049	4.25808e-06	6.723e-05	PF03141:Putative S-adenosyl-L-methionine-dependent methyltransferase	-
BnaC03g25740D	-4.19436	0.000787015	0.00955064	-4.10128	0.00544408	0.0588242	-6.60054	9.53655e-06	0.000138924	PF03141:Putative S-adenosyl-L-methionine-dependent methyltransferase	-
BnaA09g18060D	-3.73784	1.97403e-05	0.000346874	-2.98147	9.03532e-05	0.00166261	-1.51895	0.00882416	0.0578642	PF03141:Putative S-adenosyl-L-methionine-dependent methyltransferase	-
BnaC03g59080D	-2.45195	2.77849e-08	8.24358e-07	-2.32076	0.00128908	0.0171952	-2.18074	8.2344e-07	1.50104e-05	PF03141:Putative S-adenosyl-L-methionine-dependent methyltransferase	-
BnaA09g29320D	-1.90864	4.68956e-13	3.10922e-11	-2.07217	1.23823e-14	1.97399e-12	-2.03123	1.06482e-16	8.69403e-15	PF03141:Putative S-adenosyl-L-methionine-dependent methyltransferase	-
BnaA08g09060D	-1.23438	0.000661796	0.00818713	-1.21878	0.000746505	0.0106926	-1.34916	3.3149e-08	7.81996e-07	PF03141:Putative S-adenosyl-L-methionine-dependent methyltransferase	-
BnaA03g26990D	1.05179	0.00398535	0.0390793	0.999639	0.00757938	0.0778211	0.804507	4.19246e-05	0.000526672	PF03141:Putative S-adenosyl-L-methionine-dependent methyltransferase	-
BnaA07g25910D	-3.85151	4.16739e-06	8.29229e-05	-3.675	0.000124157	0.00219923	-2.25554	8.56566e-05	0.00100512	PF03145:Seven in absentia protein family	-
BnaC04g34440D	-1.86312	0.000859943	0.0103398	-2.29069	0.0264702	0.21347	-1.85717	0.000928701	0.00830253	PF03145:Seven in absentia protein family	-
BnaC04g30530D	-1.85142	0.0035995	0.0358063	-1.38422	0.0164766	0.146263	-0.702118	0.135312	0.443512	PF03145:Seven in absentia protein family	-
BnaC04g48050D	6.64799	1.65388e-06	3.56713e-05	5.47172	8.57654e-05	0.00158754	5.86444	1.65733e-05	0.000228355	PF03145:Seven in absentia protein family	-
BnaC01g06130D	-7.66947	1.07194e-52	4.56186e-49	-5.44918	1.33635e-18	4.23136e-16	-6.33744	1.79086e-69	1.52617e-65	PF03151:Triose-phosphate Transporter family	-
BnaC01g00350D	-6.74259	8.70885e-15	7.83347e-13	-4.70522	2.78497e-15	4.93183e-13	-4.99034	3.293e-20	3.88414e-18	PF03151:Triose-phosphate Transporter family	-
BnaA03g24170D	-1.53007	8.94143e-05	0.00136785	-1.10484	0.00602641	0.0640989	-1.44294	1.30288e-08	3.29016e-07	PF03151:Triose-phosphate Transporter family	-
BnaC06g01790D	-1.19474	0.00119132	0.0137418	-0.630909	0.0901771	0.515523	-1.01192	2.29807e-05	0.000306781	PF03151:Triose-phosphate Transporter family	-
BnaC04g18310D	-1.07192	0.000413662	0.00540731	-1.63414	0.00126992	0.0169726	-0.775525	0.00242249	0.0191796	PF03151:Triose-phosphate Transporter family	-
BnaA01g05480D	1.3753	0.000153384	0.00221038	1.19988	0.00439935	0.0492472	1.58956	9.47515e-10	2.90197e-08	PF03151:Triose-phosphate Transporter family	-
BnaC06g20900D	9.4559	6.25326e-12	3.4338e-10	9.46686	1.28613e-11	1.09749e-09	9.46073	1.09992e-14	6.93693e-13	PF03151:Triose-phosphate Transporter family	-
BnaC04g33610D	-1.76991	1.05385e-05	0.000194994	-1.55222	1.92135e-05	0.000418699	-1.47315	4.68111e-11	1.7632e-09	PF03152:Ubiquitin fusion degradation protein UFD1	UFD1
BnaCnng05950D	-3.1858	0.000954668	0.0113426	-3.40897	6.86328e-10	3.99656e-08	-2.67331	3.4895e-06	5.62146e-05	PF03162:Tyrosine phosphatase family	-
BnaA03g28120D	-1.45662	4.19216e-06	8.33913e-05	-0.849323	0.160481	0.733113	-1.63804	0.00419335	0.0307668	PF03162:Tyrosine phosphatase family	-
BnaA09g20630D	2.19047	0.00112327	0.0130697	1.06241	0.0622739	0.402007	1.24739	0.066309	0.277224	PF03162:Tyrosine phosphatase family	-
BnaC07g38620D	-3.31597	5.75301e-09	1.89975e-07	-3.32985	2.02156e-07	6.93466e-06	-3.00103	2.59198e-08	6.21129e-07	PF03168:Late embryogenesis abundant protein	-
BnaA04g21040D	-2.40978	1.44407e-06	3.1566e-05	-1.94425	0.0033216	0.0386957	-2.40133	4.32729e-09	1.18529e-07	PF03168:Late embryogenesis abundant protein	-
BnaC03g24650D	-2.30182	8.1595e-05	0.00125557	-2.46666	1.73515e-07	6.03658e-06	-3.02223	4.96405e-22	6.94913e-20	PF03168:Late embryogenesis abundant protein	-
BnaA04g20980D	-1.62716	3.43884e-05	0.000574047	-1.49754	7.21279e-05	0.00136564	-1.41841	0.000426501	0.00418979	PF03168:Late embryogenesis abundant protein	-
BnaA03g20620D	2.17194	1.96726e-10	8.32522e-09	2.23779	4.60589e-07	1.45104e-05	2.00526	8.50886e-10	2.63203e-08	PF03168:Late embryogenesis abundant protein	-
BnaA03g26670D	4.16888	6.43818e-05	0.00101973	3.34443	0.00559634	0.0602137	3.73092	5.02155e-07	9.52822e-06	PF03168:Late embryogenesis abundant protein	-
BnaC04g44980D	9.96947	6.38987e-13	4.1398e-11	9.43628	8.76356e-14	1.19236e-11	8.72032	2.14461e-12	1.00282e-10	PF03168:Late embryogenesis abundant protein	-
BnaC01g21570D	-5.80403	4.02726e-05	0.000662208	-5.78456	4.37495e-05	0.000869548	-5.40539	1.85999e-09	5.44234e-08	PF03171:2OG-Fe(II) oxygenase superfamily	2OG-FeII_Oxy
BnaC05g45530D	-4.82256	1.05908e-11	5.62071e-10	-5.27302	4.97414e-12	4.68183e-10	-6.06319	1.13774e-07	2.43308e-06	PF03171:2OG-Fe(II) oxygenase superfamily	2OG-FeII_Oxy
BnaC09g00420D	-3.03994	6.00899e-10	2.35419e-08	-1.79872	2.50452e-05	0.000529495	-1.83593	0.000979052	0.00869226	PF03171:2OG-Fe(II) oxygenase superfamily	2OG-FeII_Oxy
BnaC09g38980D	-1.70316	5.207e-07	1.23408e-05	-1.53209	0.00288681	0.0343528	-1.66732	4.00951e-18	3.86091e-16	PF03171:2OG-Fe(II) oxygenase superfamily	2OG-FeII_Oxy
BnaC03g34650D	0.951896	0.000896653	0.0107169	1.0164	7.41515e-05	0.00139818	0.872688	0.000120024	0.00136243	PF03171:2OG-Fe(II) oxygenase superfamily	2OG-FeII_Oxy
BnaA09g11660D	3.38581	1.3737e-08	4.29459e-07	3.14921	9.76694e-10	5.46933e-08	2.31828	1.44859e-08	3.63351e-07	PF03171:2OG-Fe(II) oxygenase superfamily	2OG-FeII_Oxy
BnaC09g24430D	4.92984	0.00422168	0.0409952	6.27183	0.000796605	0.0113042	4.67735	0.0370561	0.181685	PF03171:2OG-Fe(II) oxygenase superfamily	2OG-FeII_Oxy
BnaA08g04730D	5.30974	0.00519785	0.048858	4.22498	0.124747	0.633339	3.88331	0.12764	0.427447	PF03171:2OG-Fe(II) oxygenase superfamily	2OG-FeII_Oxy
BnaAnng12450D	1.16452	0.00114539	0.0132841	0.993746	0.160734	0.733714	0.883216	0.0226605	0.124213	PF03171:2OG-Fe(II) oxygenase superfamily|PF14226:non-haem dioxygenase in morphine synthesis N-terminal	2OG-FeII_Oxy
BnaCnng61390D	1.62869	0.00280029	0.0287493	2.75988	1.02827e-06	3.00649e-05	1.70917	1.24605e-08	3.16744e-07	PF03171:2OG-Fe(II) oxygenase superfamily|PF14226:non-haem dioxygenase in morphine synthesis N-terminal	2OG-FeII_Oxy
BnaC07g29940D	2.34221	0.000102666	0.00154729	2.20901	4.13335e-05	0.000825588	2.94868	1.20759e-07	2.57117e-06	PF03171:2OG-Fe(II) oxygenase superfamily|PF14226:non-haem dioxygenase in morphine synthesis N-terminal	2OG-FeII_Oxy
BnaA03g27500D	0.866993	0.00499496	0.047264	1.05434	0.0149376	0.135243	0.620295	0.000789088	0.00721427	PF03179:Vacuolar (H+)-ATPase G subunit	-
BnaA09g04520D	3.86492	7.18549e-05	0.00112424	3.46769	7.58552e-06	0.000180097	2.89912	0.000499538	0.00481636	PF03181:BURP domain	-
BnaA06g09530D	-1.93554	0.000738489	0.00902449	-1.45169	0.00182554	0.0231255	-1.42344	2.87193e-09	8.13448e-08	PF03188:Eukaryotic cytochrome b561	Cytochrom_B561
BnaC03g17140D	1.43541	0.00078636	0.0095444	1.14009	0.229165	0.869366	1.1887	0.0386776	0.187777	PF03188:Eukaryotic cytochrome b561	Cytochrom_B561
BnaC05g44370D	-1.44323	0.000106828	0.00160135	-1.35329	0.0115305	0.10996	-1.72863	1.37044e-08	3.44892e-07	PF03188:Eukaryotic cytochrome b561|PF03351:DOMON domain	Cytochrom_B561
BnaC02g37020D	-1.99474	0.00336151	0.0337146	-1.72857	0.121706	0.623846	-1.34176	0.081351	0.319603	PF03195:Protein of unknown function DUF260	-
BnaA01g32900D	1.71321	0.000126554	0.00185916	2.47783	6.53867e-10	3.82685e-08	0.616119	0.163861	0.496442	PF03195:Protein of unknown function DUF260	-
BnaA04g28360D	2.39349	0.00123398	0.0141763	2.19635	0.016478	0.146263	1.54574	0.00866376	0.056975	PF03195:Protein of unknown function DUF260	-
BnaA08g24550D	-2.23599	6.79138e-12	3.70242e-10	-2.03331	4.27521e-13	4.96291e-11	-2.02279	9.43475e-25	1.65353e-22	PF03223:V-ATPase subunit C	-
BnaCnng51300D	0.825889	0.000723962	0.00887084	0.801505	0.00685907	0.0715915	0.712004	3.66612e-05	0.000467268	PF03223:V-ATPase subunit C	-
BnaCnng24190D	-6.61328	3.66221e-06	7.37326e-05	-5.85506	2.24233e-05	0.00048027	-5.62833	1.31497e-06	2.30402e-05	PF03226:Yippee zinc-binding/DNA-binding /Mis18, centromere assembly|PF00717:Peptidase S24-like	Peptidase_S24
BnaC05g04890D	-7.60284	4.42262e-08	1.26796e-06	-7.09393	4.4188e-07	1.39786e-05	-5.69711	5.09457e-09	1.38322e-07	PF03227:Gamma interferon inducible lysosomal thiol reductase (GILT)	-
BnaC03g73200D	-2.45036	1.34407e-05	0.000243985	-2.51263	8.20965e-09	3.73814e-07	-2.38312	3.00138e-12	1.36871e-10	PF03242:Late embryogenesis abundant protein	-
BnaAnng27250D	-3.33706	0.000163571	0.00234428	-2.92172	0.000197	0.00330628	-2.80855	5.62491e-06	8.66238e-05	PF03271:EB1-like C-terminal motif	-
BnaC09g07360D	3.82147	7.72279e-07	1.77653e-05	4.62541	3.66351e-10	2.27184e-08	5.18864	1.76663e-19	1.9489e-17	PF03271:EB1-like C-terminal motif|PF00307:Calponin homology (CH) domain	CH
BnaC05g43460D	-3.1171	4.12058e-13	2.75884e-11	-2.62343	3.59167e-07	1.16024e-05	-2.14936	4.82169e-17	4.08352e-15	PF03283:Pectinacetylesterase	-
BnaC05g45920D	-2.42312	2.18923e-07	5.55183e-06	-1.94952	1.86139e-05	0.000406536	-1.81535	6.91982e-08	1.54273e-06	PF03283:Pectinacetylesterase	-
BnaC05g11090D	6.1169	6.41546e-05	0.00101637	5.20829	0.0025048	0.0303965	5.31692	0.00103222	0.00912043	PF03291:mRNA capping enzyme	-
BnaA01g05390D	0.965532	0.00246975	0.0257757	0.990092	0.0058291	0.062347	0.985644	4.39457e-07	8.46339e-06	PF03297:S25 ribosomal protein	-
BnaCnng22990D	6.01412	8.07986e-05	0.00124472	5.8361	0.000123054	0.00218194	5.62374	0.000243994	0.00256192	PF03311:Cornichon protein	-
BnaC01g01570D	-5.46157	4.0024e-11	1.8965e-09	-4.75791	9.26658e-11	6.56599e-09	-5.4644	1.50946e-30	4.25242e-28	PF03321:GH3 auxin-responsive promoter	-
BnaA06g03580D	1.82446	0.000146162	0.00211796	1.80381	4.92824e-05	0.000966931	1.61672	1.64439e-06	2.83244e-05	PF03321:GH3 auxin-responsive promoter	-
BnaA10g19970D	3.04099	2.65639e-06	5.50445e-05	3.0371	2.50025e-05	0.000529081	2.5154	1.38133e-09	4.12862e-08	PF03321:GH3 auxin-responsive promoter	-
BnaCnng28110D	7.70942	2.7726e-09	9.64687e-08	8.38223	8.38254e-08	3.12515e-06	4.81289	7.38406e-06	0.000110677	PF03321:GH3 auxin-responsive promoter	-
BnaAnng00290D	-10.2547	4.21224e-15	4.00015e-13	-4.38995	0.00105472	0.0144363	-6.99147	4.76871e-27	1.02236e-24	PF03330:Rare lipoprotein A (RlpA)-like double-psi beta-barrel|PF01357:Pollen allergen	-
BnaCnng23400D	-2.49812	1.44456e-05	0.000260284	-2.32958	1.55716e-05	0.000345919	-2.24234	8.02241e-17	6.63757e-15	PF03330:Rare lipoprotein A (RlpA)-like double-psi beta-barrel|PF01357:Pollen allergen	-
BnaC02g03580D	1.16536	4.96121e-05	0.000802408	1.33018	0.000182131	0.0030808	1.28966	9.80572e-08	2.12227e-06	PF03330:Rare lipoprotein A (RlpA)-like double-psi beta-barrel|PF01357:Pollen allergen	-
BnaA09g07760D	-0.871515	0.00143292	0.0160952	-0.698257	0.00425884	0.0479477	-0.747684	5.57905e-07	1.04839e-05	PF03345:Oligosaccharyltransferase 48 kDa subunit beta	-
BnaC05g45570D	-10.1297	6.39641e-16	6.99098e-14	-7.04898	1.12112e-28	1.67461e-25	-7.85699	1.15893e-24	2.0156e-22	PF03348:Serine incorporator (Serinc)	TMS_TDE
BnaA10g29840D	6.4304	6.525e-06	0.000125471	3.08319	0.017782	0.155228	4.07067	0.00187523	0.0153734	PF03350:Uncharacterized protein family, UPF0114	-
BnaA07g19010D	-5.09511	3.75213e-05	0.000621319	-3.01049	1.67351e-05	0.000369375	-1.72911	0.0720882	0.294398	PF03351:DOMON domain	-
BnaC01g38620D	6.83827	1.18024e-06	2.63056e-05	4.40634	0.000506953	0.00763541	5.31979	8.59449e-06	0.000126607	PF03352:Methyladenine glycosylase	-
BnaC02g46050D	7.28194	1.86301e-07	4.77974e-06	4.11253	5.49878e-08	2.13338e-06	4.16538	2.21709e-07	4.49725e-06	PF03352:Methyladenine glycosylase	-
BnaA07g20120D	7.45535	4.28256e-08	1.22884e-06	7.43942	4.77018e-08	1.87613e-06	7.32095	3.0967e-08	7.34332e-07	PF03352:Methyladenine glycosylase	-
BnaA01g07660D	0.966665	0.00200252	0.0215682	1.41922	0.00102544	0.0141	1.027	0.000190296	0.00205995	PF03357:Snf7	ESCRT-III
BnaA04g05620D	-5.90173	0.000210157	0.00294078	-4.80399	0.00961257	0.0946653	-6.19787	2.04532e-05	0.000275904	PF03358:NADPH-dependent FMN reductase	FMN_red
BnaA02g07440D	1.9157	1.12257e-05	0.000206253	1.45583	0.00798291	0.0813268	1.20904	0.000522197	0.00501356	PF03358:NADPH-dependent FMN reductase	FMN_red
BnaA04g13300D	5.32378	0.00281591	0.0288893	5.5366	0.000936626	0.0130301	3.14499	0.0338154	0.169303	PF03358:NADPH-dependent FMN reductase	FMN_red
BnaA10g05800D	3.75019	2.09489e-05	0.000366316	1.60973	0.0534905	0.360327	3.3509	0.000199211	0.00214624	PF03360:Glycosyltransferase family 43	-
BnaA09g00410D	-5.58126	0.000583192	0.00731715	-6.45205	4.81339e-05	0.000947646	-4.5914	0.00290322	0.0224614	PF03364:Polyketide cyclase / dehydrase and lipid transport	-
BnaCnng54710D	2.20159	0.00130857	0.0148975	1.86913	0.0110297	0.105939	1.05732	0.0769799	0.307649	PF03364:Polyketide cyclase / dehydrase and lipid transport	-
BnaA10g13860D	-1.97002	3.56691e-09	1.2217e-07	-1.80338	7.55243e-05	0.00141968	-2.1537	6.04125e-20	6.95723e-18	PF03367:ZPR1 zinc-finger domain	-
BnaA08g07440D	5.85985	4.14814e-12	2.34205e-10	4.57326	0.000176572	0.00299341	4.37794	1.15004e-13	6.37317e-12	PF03367:ZPR1 zinc-finger domain	-
BnaC03g42180D	-7.92755	6.13223e-10	2.39971e-08	-5.47444	1.01233e-07	3.7117e-06	-5.38793	1.84591e-08	4.54484e-07	PF03372:Endonuclease/Exonuclease/phosphatase family	Exo_endo_phos
BnaC03g28740D	1.72745	0.00113515	0.0131878	2.39845	7.04545e-06	0.000168439	2.09211	0.000158721	0.00175154	PF03372:Endonuclease/Exonuclease/phosphatase family	Exo_endo_phos
BnaA10g00930D	1.83336	1.71563e-05	0.000304533	1.62783	0.00249403	0.0302925	1.93428	3.27644e-10	1.08698e-08	PF03372:Endonuclease/Exonuclease/phosphatase family	Exo_endo_phos
BnaAnng01160D	1.96487	0.00102587	0.012056	1.35226	0.00591676	0.0631274	1.00206	0.0179509	0.103486	PF03372:Endonuclease/Exonuclease/phosphatase family	Exo_endo_phos
BnaA08g07850D	2.00462	0.00054977	0.00695922	2.4248	1.39306e-05	0.000313416	1.77062	1.74031e-05	0.00023854	PF03372:Endonuclease/Exonuclease/phosphatase family	Exo_endo_phos
BnaA01g08860D	2.087	2.94137e-06	6.04714e-05	0.99711	0.0974136	0.540784	1.87022	1.57045e-10	5.46549e-09	PF03372:Endonuclease/Exonuclease/phosphatase family	Exo_endo_phos
BnaA08g00030D	-1.45787	3.91817e-09	1.33216e-07	-1.42727	1.10055e-08	4.91669e-07	-1.40382	7.80084e-10	2.42734e-08	PF03381:LEM3 (ligand-effect modulator 3) family / CDC50 family	-
BnaC01g02940D	-10.9182	1.08135e-18	1.81355e-16	-6.31603	7.81858e-09	3.57904e-07	-6.21632	0.000365562	0.00365166	PF03398:Regulator of Vps4 activity in the MVB pathway	-
BnaC01g06150D	-10.078	2.48774e-16	2.88574e-14	-7.08354	5.18963e-20	2.1225e-17	-6.3153	5.17363e-06	8.03457e-05	PF03398:Regulator of Vps4 activity in the MVB pathway	-
BnaA01g01810D	1.75778	6.78689e-09	2.21856e-07	2.07233	5.11472e-11	3.81163e-09	2.06093	1.85922e-18	1.86678e-16	PF03398:Regulator of Vps4 activity in the MVB pathway	-
BnaA01g04640D	2.12725	1.07519e-15	1.1333e-13	1.87097	5.83295e-07	1.79401e-05	2.09576	1.17286e-11	4.89057e-10	PF03398:Regulator of Vps4 activity in the MVB pathway	-
BnaA01g07420D	3.62777	2.85225e-16	3.26957e-14	4.04416	2.1293e-21	1.10837e-18	4.31781	1.81951e-31	5.61298e-29	PF03398:Regulator of Vps4 activity in the MVB pathway	-
BnaC05g45540D	-4.86727	1.45589e-14	1.24539e-12	-5.05363	3.14384e-14	4.68575e-12	-5.96496	2.49721e-16	1.95465e-14	PF03399:SAC3/GANP/Nin1/mts3/eIF-3 p25 family	SAC3_GANP
BnaA06g10080D	-2.11117	1.49817e-08	4.64933e-07	-1.68351	0.000216788	0.00359707	-1.98629	2.69632e-12	1.23704e-10	PF03404:Mo-co oxidoreductase dimerisation domain|PF00174:Oxidoreductase molybdopterin binding domain	-
BnaA03g26900D	-1.70615	0.000120185	0.00177623	-1.49126	4.49724e-07	1.41941e-05	-1.44919	4.74728e-07	9.06838e-06	PF03407:Nucleotide-diphospho-sugar transferase	-
BnaA05g03770D	-1.18926	0.00403225	0.0394823	-1.26548	0.000185499	0.00313007	-1.41616	5.1549e-08	1.18092e-06	PF03416:Peptidase family C54	-
BnaA03g15750D	5.18472	4.95912e-06	9.76211e-05	3.09082	0.0370914	0.274747	3.6772	0.000500363	0.00482364	PF03439:Early transcription elongation factor of RNA pol II, NGN section|PF00467:KOW motif|PF11942:Spt5 transcription elongation factor, acidic N-terminal	KOW
BnaA01g33010D	1.59501	0.000155738	0.00224241	1.29194	0.0743029	0.455632	1.13599	1.82255e-09	5.3351e-08	PF03446:NAD binding domain of 6-phosphogluconate dehydrogenase|PF00393:6-phosphogluconate dehydrogenase, C-terminal domain	NAD_binding_2
BnaA09g00610D	-9.69174	8.44624e-14	6.38305e-12	-6.13564	3.3592e-11	2.60215e-09	-5.27368	0.000296039	0.00303336	PF03450:CO dehydrogenase flavoprotein C-terminal domain|PF01799:[2Fe-2S] binding domain|PF01315:Aldehyde oxidase and xanthine dehydrogenase, a/b hammerhead domain|PF02738:Molybdopterin-binding domain of aldehyde dehydrogenase|PF00111:2Fe-2S iron-sulfur cluster binding domain|PF00941:FAD binding domain in molybdopterin dehydrogenase	Fer2
BnaC07g50420D	-1.81215	3.69324e-10	1.50946e-08	-2.06485	2.9661e-08	1.2131e-06	-1.85593	1.42588e-13	7.77685e-12	PF03465:eRF1 domain 3|PF03464:eRF1 domain 2|PF03463:eRF1 domain 1	-
BnaA03g21180D	-3.97344	4.28733e-10	1.72841e-08	-3.10981	6.58572e-09	3.08877e-07	-5.44071	7.28264e-13	3.63693e-11	PF03478:Protein of unknown function (DUF295)	DUF295
BnaC03g26490D	5.72827	0.000664982	0.00821974	3.25522	0.0188627	0.162657	3.69522	0.000606503	0.00571986	PF03478:Protein of unknown function (DUF295)	DUF295
BnaCnng44570D	-9.85249	6.11906e-15	5.69198e-13	-8.26012	2.59754e-13	3.22161e-11	-7.97884	4.58521e-14	2.67638e-12	PF03479:Domain of unknown function (DUF296)	-
BnaA09g10970D	-3.70518	7.57775e-06	0.000144047	-2.81528	0.000503113	0.00758755	-2.31505	0.000475848	0.00461912	PF03479:Domain of unknown function (DUF296)	-
BnaA04g19640D	-2.71893	4.51195e-08	1.29248e-06	-2.13464	4.44949e-06	0.000110529	-1.44562	0.000569118	0.00541222	PF03479:Domain of unknown function (DUF296)	-
BnaC07g39510D	1.07521	0.00423049	0.041069	0.934006	0.00533143	0.0577705	1.42912	1.79028e-09	5.25191e-08	PF03479:Domain of unknown function (DUF296)	-
BnaA01g01240D	3.15526	2.29529e-12	1.34731e-10	4.18398	1.27412e-15	2.42506e-13	3.63852	1.35222e-20	1.6701e-18	PF03492:SAM dependent carboxyl methyltransferase	-
BnaC07g39890D	0.755229	0.00414339	0.0403847	0.608259	0.0126574	0.118316	0.682719	0.000601411	0.00567891	PF03501:Plectin/S10 domain	-
BnaA04g11190D	1.22271	0.000292316	0.00396337	1.23596	2.34716e-06	6.24123e-05	1.21826	2.50263e-06	4.13723e-05	PF03501:Plectin/S10 domain	-
BnaC01g02150D	-9.88174	1.22532e-14	1.07241e-12	-6.18413	2.30863e-10	1.49647e-08	-7.68773	4.127e-18	3.96844e-16	PF03514:GRAS domain family	GRAS
BnaCnng00830D	-6.9659	7.86565e-07	1.80452e-05	-5.74491	4.95724e-05	0.000971511	-6.91533	4.67858e-07	8.96185e-06	PF03514:GRAS domain family	GRAS
BnaA08g15740D	-1.80662	0.00160088	0.0177736	-1.59024	0.00335584	0.0390218	-1.30719	0.00782257	0.052347	PF03514:GRAS domain family	GRAS
BnaA06g02820D	-1.54193	0.00241644	0.0252785	-1.44566	0.115588	0.604281	-2.08604	1.11629e-08	2.8643e-07	PF03514:GRAS domain family	GRAS
BnaA01g01120D	1.98101	0.00351554	0.0350581	1.40346	0.00048789	0.0073839	1.67919	8.32303e-12	3.53817e-10	PF03514:GRAS domain family	GRAS
BnaC06g03620D	2.0098	0.000279142	0.00380065	1.971	0.0138994	0.127524	1.08052	0.000562615	0.00535934	PF03514:GRAS domain family	GRAS
BnaC07g49170D	2.34774	1.27766e-05	0.00023247	2.4601	0.00133183	0.0176866	1.80114	1.44483e-06	2.51218e-05	PF03514:GRAS domain family	GRAS
BnaA07g29130D	-2.338	3.04702e-13	2.07682e-11	-2.13161	3.90509e-10	2.40429e-08	-2.30033	7.79852e-21	9.88238e-19	PF03547:Membrane transport protein	-
BnaA07g28990D	-2.12413	6.16457e-07	1.44443e-05	-2.01361	2.09982e-06	5.65846e-05	-1.76003	1.53595e-07	3.20229e-06	PF03547:Membrane transport protein	-
BnaC01g06090D	-6.6534	3.00434e-104	2.04569e-99	-5.50498	4.85765e-16	1.0145e-13	-5.73443	1.31358e-31	4.08925e-29	PF03552:Cellulose synthase|PF14569:Zinc-binding RING-finger	-
BnaC03g03990D	-4.88798	6.38837e-09	2.09735e-07	-3.67771	2.37765e-09	1.22008e-07	-3.37576	6.28183e-08	1.41717e-06	PF03552:Cellulose synthase|PF14569:Zinc-binding RING-finger	-
BnaA09g06990D	-2.06171	5.31495e-10	2.10407e-08	-1.98191	1.23107e-09	6.74114e-08	-1.95732	2.44879e-26	4.9753e-24	PF03552:Cellulose synthase|PF14569:Zinc-binding RING-finger	-
BnaA01g04600D	1.01839	1.08475e-07	2.91713e-06	0.875834	0.0125342	0.117429	0.762197	7.46152e-05	0.000884382	PF03552:Cellulose synthase|PF14569:Zinc-binding RING-finger	-
BnaCnng06180D	-4.20423	2.09403e-17	2.89219e-15	-3.90449	9.66622e-16	1.88149e-13	-3.93052	4.4043e-40	2.65724e-37	PF03552:Cellulose synthase|PF14570:RING/Ubox like zinc-binding domain	-
BnaA08g23750D	-10.7603	1.59684e-18	2.61372e-16	-6.94878	2.33615e-15	4.19105e-13	-8.14507	8.0324e-20	9.02169e-18	PF03556:Cullin binding	-
BnaA07g20210D	5.70326	3.62702e-51	1.45275e-47	5.60983	9.39881e-22	5.33712e-19	5.18337	3.27398e-75	3.72011e-71	PF03571:Peptidase family M49|PF00293:NUDIX domain	NUDIX
BnaC03g40960D	-1.53307	2.09198e-06	4.41552e-05	-1.76649	0.00110265	0.0150205	-1.55064	4.41242e-07	8.49538e-06	PF03600:Citrate transporter	-
BnaAnng36490D	6.2254	2.60441e-06	5.40496e-05	4.67691	1.11822e-05	0.000256881	6.839	7.24335e-07	1.33466e-05	PF03618:Kinase/pyrophosphorylase	DUF299
BnaCnng23440D	-8.91608	2.0037e-12	1.18638e-10	-4.37363	1.18524e-10	8.11135e-09	-6.83681	3.43611e-10	1.13553e-08	PF03619:Organic solute transporter Ostalpha	-
BnaAnng17930D	1.87983	1.30563e-09	4.82638e-08	1.5973	9.05839e-06	0.00021199	1.23715	4.0974e-05	0.00051654	PF03619:Organic solute transporter Ostalpha	-
BnaA01g02920D	1.30658	0.0012776	0.0146133	1.36993	0.00262278	0.0316382	0.780835	5.97172e-05	0.00072404	PF03629:Domain of unknown function (DUF303)	-
BnaC01g06290D	-10.566	6.10953e-22	1.60619e-19	-5.94734	2.00301e-13	2.55337e-11	-7.20591	1.46338e-07	3.06505e-06	PF03630:Fumble|PF01937:Protein of unknown function DUF89	Fumble
BnaA01g04760D	11.8714	2.92407e-22	8.09361e-20	10.9483	9.12983e-19	2.94512e-16	7.13472	3.79502e-07	7.40497e-06	PF03630:Fumble|PF01937:Protein of unknown function DUF89	Fumble
BnaA09g01860D	-2.93419	0.00066503	0.00821974	-2.9067	0.000106254	0.00191794	-1.85475	0.00306021	0.0234841	PF03634:TCP family transcription factor	TCP
BnaA09g17710D	-0.851995	0.0002737	0.00373402	-0.904669	0.00295295	0.0350427	-0.885485	2.39436e-06	3.97656e-05	PF03637:Mob1/phocein family	-
BnaC01g20340D	-1.57437	0.00524827	0.0492639	-1.0176	0.128005	0.642033	-1.50824	0.00395403	0.0292883	PF03643:Vacuolar protein sorting-associated protein 26	-
BnaCnng76240D	-0.775149	0.00473364	0.0451806	-0.982656	0.000721672	0.0103954	-0.871799	1.495e-05	0.000208432	PF03643:Vacuolar protein sorting-associated protein 26	-
BnaA06g19610D	3.1751	1.02543e-13	7.60597e-12	2.98695	1.79546e-17	4.63781e-15	3.27253	1.35762e-27	3.07498e-25	PF03647:Transmembrane proteins 14C	-
BnaC01g13800D	9.03934	8.62269e-13	5.42632e-11	9.1878	4.94656e-13	5.61782e-11	8.19417	2.24255e-11	8.8477e-10	PF03650:Uncharacterised protein family (UPF0041)	-
BnaA04g01690D	-3.16	0.00118507	0.0136813	-2.06937	0.00529119	0.0573887	-2.22875	0.000837677	0.00758907	PF03656:Pam16	-
BnaC03g71910D	-7.02043	1.92316e-07	4.92663e-06	-4.51236	6.54585e-05	0.00124935	-5.70442	3.36001e-09	9.37284e-08	PF03660:PHF5-like protein	-
BnaAnng25170D	5.0267	0.000822405	0.00993055	4.2949	0.0162585	0.144855	4.44626	3.50691e-05	0.000449489	PF03719:Ribosomal protein S5, C-terminal domain	-
BnaA05g32780D	1.14191	0.000624874	0.00778133	0.867221	0.112893	0.595954	1.43818	0.000249816	0.0026158	PF03725:3' exoribonuclease family, domain 2|PF00013:KH domain|PF01138:3' exoribonuclease family, domain 1|PF00575:S1 RNA binding domain	RNase_PH
BnaC01g06060D	-9.04148	6.97868e-13	4.47866e-11	-5.02387	2.75408e-06	7.20076e-05	-7.25416	1.71297e-11	6.93899e-10	PF03735:ENT domain|PF05641:Agenet domain	Agenet
BnaC01g01770D	-5.23435	0.00300693	0.0305908	-2.73586	0.052138	0.354027	-5.93959	0.00024399	0.00256192	PF03763:Remorin, C-terminal region	-
BnaC04g44940D	0.673046	0.00486814	0.046244	0.702041	0.00591899	0.0631414	0.684725	0.000167646	0.00184256	PF03764:Elongation factor G, domain IV|PF14492:Elongation Factor G, domain II|PF00679:Elongation factor G C-terminus|PF03144:Elongation factor Tu domain 2	GTP_EFTU_D2
BnaC01g03820D	-6.09353	1.76138e-10	7.53355e-09	-4.00698	3.11856e-05	0.000644397	-5.00488	3.07874e-13	1.61335e-11	PF03765:CRAL/TRIO, N-terminal domain|PF00650:CRAL/TRIO domain	CRAL_TRIO_N
BnaC01g17060D	1.96777	0.00286651	0.0293421	0.931996	0.253442	0.905658	1.22033	0.0630044	0.267392	PF03767:HAD superfamily, subfamily IIIB (Acid phosphatase)	-
BnaA06g36380D	2.80113	2.6752e-20	5.64824e-18	2.03671	1.49961e-06	4.20907e-05	2.14902	6.48716e-23	9.76311e-21	PF03767:HAD superfamily, subfamily IIIB (Acid phosphatase)	-
BnaA01g04870D	10.1608	1.39076e-16	1.68803e-14	9.31051	2.25879e-17	5.72699e-15	6.45229	1.18023e-06	2.0867e-05	PF03790:KNOX1 domain|PF05920:Homeobox KN domain|PF03789:ELK domain|PF03791:KNOX2 domain	KNOX2
BnaC01g06410D	-3.25461	2.12002e-27	1.00246e-24	-3.0471	8.27016e-19	2.71886e-16	-3.42727	6.5852e-28	1.51673e-25	PF03790:KNOX1 domain|PF05920:Homeobox KN domain|PF03791:KNOX2 domain|PF03789:ELK domain	KNOX2
BnaCnng04510D	-1.65107	0.000785816	0.0095395	-1.05004	0.0251935	0.205295	-1.97579	2.74073e-09	7.79201e-08	PF03798:TLC domain	LAG1
BnaCnng37720D	-4.93717	1.23854e-11	6.4972e-10	-3.42626	7.61979e-11	5.49953e-09	-3.62655	1.35791e-09	4.06754e-08	PF03800:Nuf2 family	-
BnaC03g21630D	-2.39674	2.50255e-13	1.72297e-11	-2.03048	2.66873e-09	1.35327e-07	-1.80362	5.38636e-16	4.0757e-14	PF03800:Nuf2 family	-
BnaCnng24170D	-1.51181	2.26614e-06	4.75366e-05	-1.71473	4.33837e-07	1.37749e-05	-1.33295	6.32846e-05	0.000762142	PF03810:Importin-beta N-terminal domain	-
BnaC07g50410D	-1.11353	0.00141443	0.0159081	-0.887365	0.000969676	0.0134382	-0.78117	0.000475896	0.00461912	PF03810:Importin-beta N-terminal domain	-
BnaC01g07450D	-7.78487	1.94507e-49	6.62209e-46	-3.6551	0.00058456	0.00865223	-7.06975	5.67946e-71	5.53147e-67	PF03822:NAF domain|PF00069:Protein kinase domain	Pkinase
BnaA10g00690D	-2.51554	2.6028e-05	0.000444847	-2.59878	1.23446e-06	3.53709e-05	-1.82407	1.29121e-08	3.26518e-07	PF03822:NAF domain|PF00069:Protein kinase domain	Pkinase
BnaA04g15530D	-1.09507	0.000504041	0.00643312	-1.28192	0.00702715	0.0730704	-0.810358	0.000322932	0.00327427	PF03822:NAF domain|PF00069:Protein kinase domain	Pkinase
BnaA01g06180D	1.53016	1.40727e-06	3.0831e-05	1.65222	5.00035e-08	1.95769e-06	1.40627	2.4355e-10	8.22809e-09	PF03822:NAF domain|PF00069:Protein kinase domain	Pkinase
BnaC05g46570D	-8.83538	1.8569e-12	1.1062e-10	-5.58069	1.40131e-10	9.43038e-09	-7.7723	2.71632e-10	9.11542e-09	PF03834:Binding domain of DNA repair protein Ercc1 (rad10/Swi10)	-
BnaA08g22590D	-1.53108	2.48982e-05	0.000427684	-1.44006	1.39115e-06	3.94535e-05	-1.62455	1.52252e-13	8.2907e-12	PF03868:Ribosomal protein L6, N-terminal domain|PF01159:Ribosomal protein L6e	-
BnaAnng29570D	-1.69779	2.49104e-05	0.000427787	-1.98391	0.000429886	0.00662721	-1.87529	1.21479e-08	3.09491e-07	PF03874:RNA polymerase Rpb4	RNA_pol_Rpb4
BnaA04g08230D	-1.18824	0.000151393	0.002184	-1.18704	0.0746941	0.456755	-1.88372	1.09949e-09	3.33299e-08	PF03893:Lipase 3 N-terminal region|PF01764:Lipase (class 3)	Lipase_3
BnaC01g37230D	4.38902	2.07569e-41	4.41674e-38	4.17421	6.5418e-19	2.18198e-16	3.93228	2.49947e-35	1.12108e-32	PF03893:Lipase 3 N-terminal region|PF01764:Lipase (class 3)	Lipase_3
BnaA08g23440D	-2.54347	4.8373e-06	9.53885e-05	-3.36898	2.59749e-05	0.000547632	-2.11457	7.94201e-05	0.000937097	PF03901:Alg9-like mannosyltransferase family	Glyco_transf_22
BnaA08g27440D	-1.22851	2.30668e-07	5.81503e-06	-1.16593	3.59701e-05	0.000730134	-1.30136	8.47524e-09	2.22148e-07	PF03909:BSD domain	-
BnaA05g04540D	3.0161	1.37067e-18	2.2653e-16	2.55704	1.03438e-12	1.09849e-10	2.88461	2.36727e-13	1.25498e-11	PF03911:Sec61beta family	-
BnaC06g39540D	1.41192	0.0020174	0.0216975	1.12433	0.00339011	0.0393537	1.43971	3.21503e-09	8.99787e-08	PF03914:CBF/Mak21 family|PF07540:Nucleolar complex-associated protein	CBF
BnaA06g14260D	-1.63695	0.000167902	0.00239878	-2.35743	3.29992e-06	8.47616e-05	-2.80263	4.35704e-12	1.93271e-10	PF03931:Skp1 family, tetramerisation domain|PF01466:Skp1 family, dimerisation domain	Skp1
BnaCnng41750D	-5.18393	0.0023616	0.0247886	-5.95323	0.00185888	0.0235003	-4.87857	0.010326	0.0659302	PF03936:Terpene synthase family, metal binding domain|PF01397:Terpene synthase, N-terminal domain	-
BnaC03g38580D	-4.44593	0.00339844	0.0340349	-2.14876	0.0981377	0.543662	-4.16578	0.000175401	0.00191585	PF03936:Terpene synthase family, metal binding domain|PF01397:Terpene synthase, N-terminal domain	-
BnaA01g01470D	2.30141	3.18426e-12	1.82816e-10	2.35377	5.52456e-27	6.43377e-24	2.18629	7.78835e-31	2.231e-28	PF03947:Ribosomal Proteins L2, C-terminal domain	Ribosomal_L2_C
BnaA06g25400D	2.61748	9.94751e-07	2.24655e-05	2.62574	0.00181469	0.0230178	3.32679	8.3702e-08	1.83241e-06	PF03947:Ribosomal Proteins L2, C-terminal domain	Ribosomal_L2_C
BnaC04g49430D	5.92905	2.02074e-16	2.37641e-14	4.78765	1.34539e-09	7.27887e-08	4.73238	2.63699e-16	2.05933e-14	PF03947:Ribosomal Proteins L2, C-terminal domain	Ribosomal_L2_C
BnaA02g35010D	1.67929	0.000265171	0.00363076	1.21033	0.254546	0.90682	0.771436	0.00697229	0.0475296	PF03949:Malic enzyme, NAD binding domain|PF00390:Malic enzyme, N-terminal domain	Malic_M
BnaC03g40250D	-3.6208	6.56121e-14	5.00852e-12	-3.30362	1.10526e-10	7.61708e-09	-3.2317	3.37974e-29	8.50247e-27	PF03951:Glutamine synthetase, beta-Grasp domain|PF00120:Glutamine synthetase, catalytic domain	-
BnaC06g31740D	2.44596	0.000339991	0.00453483	1.42807	0.0345795	0.261214	1.40093	0.0269903	0.142753	PF03952:Enolase, N-terminal domain	-
BnaC03g63960D	-3.65978	1.62206e-09	5.89368e-08	-3.64778	9.7202e-09	4.38238e-07	-3.4077	1.52802e-15	1.08741e-13	PF03953:Tubulin C-terminal domain|PF00091:Tubulin/FtsZ family, GTPase domain	Tubulin
BnaA04g28540D	0.990858	9.41638e-05	0.00143087	0.845699	0.00941107	0.0929741	1.0795	6.30512e-09	1.68638e-07	PF03953:Tubulin C-terminal domain|PF00091:Tubulin/FtsZ family, GTPase domain	Tubulin
BnaA02g04470D	1.09304	2.13163e-05	0.00037207	1.2269	1.85071e-06	5.06019e-05	1.21708	9.42368e-08	2.04478e-06	PF03953:Tubulin C-terminal domain|PF00091:Tubulin/FtsZ family, GTPase domain	Tubulin
BnaA10g15410D	1.29865	9.15036e-07	2.07686e-05	1.00373	3.81215e-06	9.62621e-05	1.30182	2.39111e-08	5.75014e-07	PF03953:Tubulin C-terminal domain|PF00091:Tubulin/FtsZ family, GTPase domain	Tubulin
BnaCnng51680D	10.434	1.07781e-57	7.3389e-54	7.60171	7.70915e-23	5.09323e-20	9.59603	8.14009e-08	1.78871e-06	PF03953:Tubulin C-terminal domain|PF00091:Tubulin/FtsZ family, GTPase domain	Tubulin
BnaC05g17460D	-1.56726	1.54115e-06	3.34731e-05	-1.86022	0.00025829	0.00420349	-1.43328	6.45913e-06	9.80097e-05	PF03966:Trm112p-like protein	-
BnaC04g55380D	-8.28437	1.66603e-09	6.05021e-08	-6.83216	3.19936e-08	1.30153e-06	-7.54217	1.09745e-09	3.32829e-08	PF03999:Microtubule associated protein (MAP65/ASE1 family)	-
BnaA02g00910D	2.80412	1.61888e-10	6.95903e-09	2.97352	2.87176e-10	1.82365e-08	2.79418	8.70084e-23	1.29235e-20	PF04003:Dip2/Utp12 Family	-
BnaA09g05610D	-1.14088	0.00062517	0.00778359	-1.20621	2.72594e-05	0.000572256	-1.21478	1.06549e-07	2.29283e-06	PF04004:Leo1-like protein	-
BnaA05g01140D	-5.54416	1.92943e-16	2.28481e-14	-4.93771	1.02782e-11	8.98489e-10	-5.82304	1.29536e-15	9.29605e-14	PF04030:D-arabinono-1,4-lactone oxidase|PF01565:FAD binding domain	FAD_binding_4
BnaC02g46740D	-3.86617	1.26022e-15	1.3161e-13	-3.07307	6.08837e-07	1.86256e-05	-3.07801	4.31541e-17	3.66843e-15	PF04043:Plant invertase/pectin methylesterase inhibitor	-
BnaA06g21800D	-2.22682	9.8684e-05	0.00149521	-1.79072	0.0584883	0.384347	-1.3023	0.0582128	0.253284	PF04043:Plant invertase/pectin methylesterase inhibitor	-
BnaC01g17200D	6.00982	0.00493668	0.0467985	3.29424	0.0103641	0.100723	4.79118	2.20079e-07	4.4675e-06	PF04043:Plant invertase/pectin methylesterase inhibitor	-
BnaC05g46130D	-5.55114	5.17417e-08	1.46859e-06	-4.7982	8.35538e-07	2.49499e-05	-4.5165	6.06261e-07	1.13395e-05	PF04043:Plant invertase/pectin methylesterase inhibitor|PF01095:Pectinesterase	-
BnaA03g31370D	-2.26941	0.000495913	0.00634841	-1.42729	0.0691313	0.432527	-2.69119	8.78109e-08	1.91449e-06	PF04043:Plant invertase/pectin methylesterase inhibitor|PF01095:Pectinesterase	-
BnaA05g04610D	4.22934	2.24308e-10	9.41059e-09	3.53684	2.13542e-06	5.74714e-05	2.9711	2.01348e-13	1.07748e-11	PF04043:Plant invertase/pectin methylesterase inhibitor|PF01095:Pectinesterase	-
BnaC05g42720D	4.51337	5.27491e-40	8.76035e-37	4.75219	2.96144e-24	2.54351e-21	4.2137	4.6573e-45	4.40994e-42	PF04048:Sec8 exocyst complex component specific domain	-
BnaC01g38640D	9.50257	1.47352e-14	1.25573e-12	10.3415	5.51669e-17	1.30708e-14	7.80949	3.72979e-24	6.20201e-22	PF04048:Sec8 exocyst complex component specific domain	-
BnaC05g46830D	-1.02996	0.00211623	0.0225892	-1.25066	1.85787e-06	5.07571e-05	-0.933525	1.64882e-06	2.8372e-05	PF04051:Transport protein particle (TRAPP) component	TRAPP_Bet3
BnaA01g05610D	0.962763	0.000685702	0.00845047	0.82582	0.000753386	0.0107754	1.05187	2.05273e-05	0.000276793	PF04053:Coatomer WD associated region|PF00400:WD domain, G-beta repeat	Coatomer_WDAD
BnaA04g24020D	-3.67132	4.00237e-17	5.24087e-15	-3.67078	1.63781e-26	1.81506e-23	-2.90269	1.66578e-17	1.48453e-15	PF04097:Nup93/Nic96	-
BnaC01g06700D	-10.2179	6.88212e-16	7.45543e-14	-4.25109	0.000760546	0.0108542	-7.04511	5.02346e-19	5.30154e-17	PF04101:Glycosyltransferase family 28 C-terminal domain|PF06925:Monogalactosyldiacylglycerol (MGDG) synthase	-
BnaC01g07590D	-5.78649	7.25446e-28	3.52831e-25	-4.34539	3.28368e-21	1.64687e-18	-5.34741	1.82518e-29	4.6956e-27	PF04108:Autophagy protein Apg17|PF10377:Autophagy-related protein 11	-
BnaA07g18980D	1.10743	5.78612e-05	0.000922893	1.10867	0.00712164	0.0739055	0.72593	0.00440852	0.0321759	PF04111:Autophagy protein Apg6	-
BnaC05g44830D	-7.48143	1.05319e-19	2.00023e-17	-5.65128	1.75367e-10	1.16083e-08	-6.83116	1.27329e-29	3.33877e-27	PF04113:Gpi16 subunit, GPI transamidase component	-
BnaC05g48230D	-4.85671	2.34916e-13	1.62728e-11	-3.56611	2.82317e-10	1.79445e-08	-3.7753	3.27228e-19	3.50772e-17	PF04116:Fatty acid hydroxylase superfamily	-
BnaA04g20360D	1.21829	0.00118926	0.0137227	1.4717	0.00692857	0.0722401	1.1551	0.000206628	0.002217	PF04116:Fatty acid hydroxylase superfamily	-
BnaC03g20880D	6.46162	0.000121665	0.0017943	5.99043	0.000191341	0.00321601	6.83912	5.20751e-06	8.08349e-05	PF04116:Fatty acid hydroxylase superfamily|PF12076:WAX2 C-terminal domain	-
BnaA03g03730D	-2.09371	2.86015e-05	0.000485663	-2.42906	3.91414e-08	1.56452e-06	-2.57439	1.08615e-08	2.79221e-07	PF04124:Dor1-like family	-
BnaC02g22120D	8.46995	1.58563e-10	6.82471e-09	5.91676	1.60501e-08	6.9917e-07	6.34848	1.32399e-11	5.46724e-10	PF04130:Spc97 / Spc98 family	-
BnaA03g31760D	-1.54039	0.000531013	0.00674574	-1.476	0.00015435	0.00266065	-1.52456	0.000559449	0.00533291	PF04133:Vacuolar protein sorting 55	-
BnaC05g46310D	-4.92464	2.30118e-07	5.80547e-06	-2.53195	0.000183682	0.00310246	-3.76923	8.32243e-06	0.000123105	PF04139:Rad9	-
BnaA05g31740D	2.68821	2.94481e-05	0.000498422	1.38968	0.00220647	0.0272575	1.81811	0.000603287	0.00569585	PF04139:Rad9	-
BnaA08g15010D	-1.67581	1.156e-05	0.000211937	-0.830947	0.0445059	0.316243	-0.691866	0.0570721	0.249884	PF04142:Nucleotide-sugar transporter	-
BnaA08g07010D	1.15781	0.000405957	0.00532089	1.17274	0.000110821	0.00198968	1.3211	1.88233e-09	5.4997e-08	PF04144:SCAMP family	-
BnaC03g58200D	-7.8573	3.26781e-09	1.12663e-07	-4.43217	2.63221e-05	0.000554273	-4.11568	9.76659e-09	2.53656e-07	PF04146:YT521-B-like domain	YTH
BnaA08g18680D	-4.0997	0.00033209	0.00444076	-2.17024	0.00603421	0.0641712	-2.66528	0.00109194	0.00957726	PF04146:YT521-B-like domain	YTH
BnaA06g04310D	-1.55068	0.000592333	0.00742636	-1.26605	0.00692092	0.0721823	-1.23673	6.67381e-05	0.000800623	PF04153:NOT2 / NOT3 / NOT5 family	-
BnaA01g02840D	2.10447	3.2236e-17	4.30882e-15	2.62402	4.34193e-15	7.53369e-13	2.3034	2.2957e-17	2.00656e-15	PF04176:TIP41-like family	-
BnaA04g23370D	-1.94026	0.000493895	0.00632496	-0.857107	0.239146	0.886238	-0.876358	0.0424552	0.201239	PF04179:Initiator tRNA phosphoribosyl transferase	-
BnaC05g48190D	-1.21689	0.00124846	0.0143161	-1.18725	0.0674977	0.425523	-1.37483	1.66164e-06	2.85783e-05	PF04185:Phosphoesterase family	Phosphoesterase
BnaCnng25090D	6.34813	1.72566e-05	0.000305915	5.58086	0.000736403	0.0105798	5.73515	0.000482826	0.0046744	PF04193:PQ loop repeat	-
BnaA06g02750D	1.98354	0.00077407	0.00941873	2.46197	7.28937e-05	0.00137824	3.8462	1.67854e-12	7.95247e-11	PF04227:Indigoidine synthase A like protein	-
BnaC01g04800D	-8.16127	7.10726e-10	2.7481e-08	-8.49022	3.00318e-11	2.35557e-09	-7.19971	1.08036e-08	2.77942e-07	PF04258:Signal peptide peptidase	-
BnaC06g37400D	-4.21477	1.36022e-07	3.57879e-06	-3.5212	2.82016e-06	7.36221e-05	-4.25433	7.09287e-12	3.0528e-10	PF04258:Signal peptide peptidase	-
BnaC05g47860D	-5.34921	4.23638e-10	1.70989e-08	-4.79895	2.17046e-08	9.18146e-07	-3.98985	1.27452e-11	5.27981e-10	PF04266:ASCH domain	-
BnaAnng23610D	1.39852	0.00101719	0.0119623	0.926676	0.0307237	0.239318	1.33931	1.29131e-05	0.00018261	PF04278:Tic22-like family	-
BnaA03g02950D	-1.57474	0.000263635	0.00361191	-1.71297	0.00203057	0.0253904	-1.58261	2.54615e-14	1.54299e-12	PF04387:Protein tyrosine phosphatase-like protein, PTPLA	-
BnaC05g44500D	-9.7805	6.25609e-15	5.80359e-13	-5.18326	8.8732e-14	1.2049e-11	-9.14431	3.79332e-14	2.24296e-12	PF04398:Protein of unknown function, DUF538	-
BnaC05g43680D	-3.30913	1.97079e-14	1.62658e-12	-2.19949	5.85349e-05	0.00112817	-2.70839	2.18188e-16	1.71769e-14	PF04398:Protein of unknown function, DUF538	-
BnaC01g15960D	-1.40823	0.00030823	0.00415708	-1.39303	0.0133854	0.123733	-0.989196	1.11095e-05	0.00015962	PF04398:Protein of unknown function, DUF538	-
BnaA02g04340D	1.284	9.04584e-05	0.00138196	1.28101	0.000459349	0.00700908	1.27318	0.000275498	0.00285099	PF04398:Protein of unknown function, DUF538	-
BnaA10g02760D	-3.62598	1.51352e-05	0.000271438	-2.70191	0.000107954	0.00194482	-3.15252	4.00758e-06	6.36137e-05	PF04432:Coenzyme F420 hydrogenase/dehydrogenase, beta subunit C terminus|PF04422:Coenzyme F420 hydrogenase/dehydrogenase, beta subunit N-term	-
BnaA08g21210D	0.959909	0.000251853	0.00347074	0.941997	0.0137741	0.12656	1.19919	4.59419e-06	7.21192e-05	PF04433:SWIRM domain|PF16495:SWIRM-associated region 1|PF00249:Myb-like DNA-binding domain	SWIRM
BnaC03g26520D	-7.79958	1.83851e-09	6.6306e-08	-7.9603	1.03817e-09	5.75727e-08	-6.04449	7.45792e-08	1.6535e-06	PF04434:SWIM zinc finger	SWIM
BnaC05g46000D	-2.3193	5.71809e-11	2.63788e-09	-1.35148	0.000792938	0.0112637	-2.69319	7.87838e-16	5.76924e-14	PF04434:SWIM zinc finger	SWIM
BnaA03g26680D	1.52832	1.98089e-06	4.2032e-05	1.55782	8.75552e-10	4.97595e-08	1.32258	4.0729e-10	1.32858e-08	PF04437:RINT-1 / TIP-1 family|PF08318:COG4 transport protein	-
BnaA01g08060D	7.82747	5.90584e-09	1.94456e-07	5.2598	3.19629e-07	1.04579e-05	4.94358	1.69706e-13	9.17515e-12	PF04438:HIT zinc finger	-
BnaC03g34810D	-8.66082	5.65712e-12	3.12155e-10	-8.74344	4.38401e-12	4.15483e-10	-5.87119	3.96876e-13	2.04981e-11	PF04438:HIT zinc finger|PF04795:PAPA-1-like conserved region	-
BnaA05g00590D	-1.61352	1.17302e-05	0.000214709	-1.27198	0.000231007	0.00380453	-1.41533	4.99067e-06	7.78919e-05	PF04438:HIT zinc finger|PF04795:PAPA-1-like conserved region	-
BnaA06g37690D	-2.22496	7.17118e-06	0.000136947	-1.25467	0.0225958	0.188475	-2.92049	3.36049e-06	5.43675e-05	PF04452:RNA methyltransferase	-
BnaA03g20700D	4.59475	2.25858e-17	3.08194e-15	3.576	8.20647e-12	7.32294e-10	3.62097	2.0684e-13	1.10513e-11	PF04484:Family of unknown function (DUF566)	-
[truncated: 2,662 more rows]

## Sheet: (C) Inocul. CR vs Inocul. CS
Table S2 D. Differentially expressed genes (DEGs) when comparisons were made between inoculated clubroot resistant (CR) and inoculated clubroot susceptible (CS) genotypes. Res1 = Resistant genotype at 1 day post inoculation, Res4 = Resistant genotype at 4 day post inoculation, and Res7 = Resistant genotype at 7 day post inoculation. Sus1 = Susceptible genotype at 1 day post inoculation, Sus4 = Su…
gene_id	Res1_TvsSus1_T_log2FoldChange	Res1_TvsSus1_T_pvalue	Res1_TvsSus1_T_padj	Res4_TvsSus4_T_log2FoldChange	Res4_TvsSus4_T_pvalue	Res4_TvsSus4_T_padj	Res7_TvsSus7_T_log2FoldChange	Res7_TvsSus7_T_pvalue	Res7_TvsSus7_T_padj	gene_description	tf_family
BnaA06g27940D	-1.18798	7.32071e-05	0.000852978	-1.01243	0.064374	0.376329	-1.28262	0.00251844	0.0262153	PF00390:Malic enzyme, N-terminal domain|PF03949:Malic enzyme, NAD binding domain	Malic_M
BnaA03g50350D	-6.10863	1.91565e-05	0.000249245	-4.76649	0.0236779	0.175042	-5.91278	0.00137625	0.0155891	PF00004:ATPase family associated with various cellular activities (AAA)	AAA
BnaA05g14180D	-3.79678	4.86677e-23	6.00754e-21	-4.01568	8.1782e-15	7.21385e-13	-4.40033	1.45535e-19	2.50972e-17	PF00004:ATPase family associated with various cellular activities (AAA)	AAA
BnaC06g10270D	-6.41848	3.92323e-06	5.82675e-05	-2.94421	0.0155453	0.124482	-4.18863	0.00131849	0.0150197	PF00004:ATPase family associated with various cellular activities (AAA)	AAA
BnaC05g24010D	-2.74988	0.00678123	0.0475888	-3.54021	0.018277	0.141999	-4.10975	0.000790546	0.00953121	PF00004:ATPase family associated with various cellular activities (AAA)	AAA
BnaA09g19390D	-1.13709	0.00361793	0.0277536	-1.52774	0.00178267	0.0199279	-2.05649	5.04102e-06	0.00010072	PF00004:ATPase family associated with various cellular activities (AAA)	AAA
BnaA08g02230D	-2.06206	1.55872e-20	1.50475e-18	-1.92062	4.65834e-11	2.25606e-09	-1.79313	2.47285e-11	1.22559e-09	PF00004:ATPase family associated with various cellular activities (AAA)	AAA
BnaC08g27560D	1.73134	1.03971e-08	2.34524e-07	1.82422	9.9307e-07	2.27092e-05	1.30329	0.00010306	0.00154291	PF00004:ATPase family associated with various cellular activities (AAA)	AAA
BnaA10g06830D	1.67445	8.58571e-09	1.9614e-07	1.84153	6.0734e-07	1.4407e-05	1.56015	2.75163e-06	5.78057e-05	PF00004:ATPase family associated with various cellular activities (AAA)	AAA
BnaA05g05880D	2.25562	0.000262491	0.00270965	2.38981	7.74974e-05	0.00122429	2.48185	0.000102773	0.00153894	PF00004:ATPase family associated with various cellular activities (AAA)	AAA
BnaC06g28800D	-1.67652	1.17865e-12	4.69225e-11	-1.62258	5.56364e-09	1.90239e-07	-1.5792	4.77746e-09	1.61151e-07	PF00004:ATPase family associated with various cellular activities (AAA)|PF01434:Peptidase family M41	AAA
BnaC05g43180D	-9.15028	1.13088e-06	1.83863e-05	-7.63056	2.39163e-14	1.95623e-12	-11.3607	4.84977e-38	5.49346e-35	PF00004:ATPase family associated with various cellular activities (AAA)|PF02359:Cell division protein 48 (CDC48), N-terminal domain|PF02933:Cell division protein 48 (CDC48), domain 2	AAA
BnaA01g32030D	-1.0086	2.03775e-10	5.94024e-09	-0.892985	2.43127e-05	0.000428585	-1.05275	1.04881e-05	0.000197208	PF00004:ATPase family associated with various cellular activities (AAA)|PF02359:Cell division protein 48 (CDC48), N-terminal domain|PF02933:Cell division protein 48 (CDC48), domain 2	AAA
BnaC01g38940D	5.67668	3.24721e-66	4.92023e-63	5.45236	1.33348e-56	5.71945e-53	5.29397	1.54131e-69	1.80408e-65	PF00004:ATPase family associated with various cellular activities (AAA)|PF02359:Cell division protein 48 (CDC48), N-terminal domain|PF02933:Cell division protein 48 (CDC48), domain 2	AAA
BnaA07g22300D	-1.05214	0.205917	0.592659	-1.01858	0.21476	0.806208	-1.67777	0.00371217	0.0365334	PF00004:ATPase family associated with various cellular activities (AAA)|PF10431:C-terminal, D2-small domain, of ClpB protein|PF07724:AAA domain (Cdc48 subfamily)	AAA
BnaCnng06190D	-8.1947	2.05768e-11	6.85892e-10	-5.3578	1.4317e-10	6.4682e-09	-5.51763	6.98883e-11	3.21046e-09	PF00004:ATPase family associated with various cellular activities (AAA)|PF12037:Domain of unknown function (DUF3523)	AAA
BnaC01g02190D	-3.93071	1.19297e-08	2.66591e-07	-2.66599	5.13679e-05	0.000845569	-4.01023	8.47285e-06	0.00016249	PF00004:ATPase family associated with various cellular activities (AAA)|PF12037:Domain of unknown function (DUF3523)	AAA
BnaC01g08150D	-2.46018	0.0761576	0.321717	-3.49978	0.0615173	0.364095	-3.72811	0.00176193	0.0193613	PF00004:ATPase family associated with various cellular activities (AAA)|PF14363:Domain associated at C-terminal with AAA	AAA
BnaC07g25140D	2.59874	6.22433e-10	1.69401e-08	1.83555	1.77623e-06	3.9044e-05	1.85462	4.70595e-05	0.000765034	PF00004:ATPase family associated with various cellular activities (AAA)|PF14363:Domain associated at C-terminal with AAA	AAA
BnaAnng29420D	-1.30611	0.00384326	0.029228	-1.39825	0.00146819	0.0167787	-1.64102	0.000556973	0.0069812	PF00005:ABC transporter	ABC_tran
BnaA03g31340D	1.70785	2.9513e-09	7.29453e-08	1.87264	6.02281e-07	1.43018e-05	1.51768	8.47649e-05	0.00129609	PF00005:ABC transporter	ABC_tran
BnaCnng29690D	9.40782	2.2804e-14	1.12646e-12	9.17581	1.92384e-13	1.35272e-11	7.4532	8.01975e-12	4.2961e-10	PF00005:ABC transporter	ABC_tran
BnaC04g25760D	8.33056	4.40847e-15	2.39868e-13	9.93148	9.87358e-16	9.86295e-14	7.53284	1.18513e-15	1.13364e-13	PF00005:ABC transporter	ABC_tran
BnaC03g63120D	1.10905	2.92985e-05	0.000368611	1.13856	0.00101629	0.0121887	1.09636	0.000595741	0.00740764	PF00005:ABC transporter|PF04068:Possible Fer4-like domain in RNase L inhibitor, RLI	ABC_tran
BnaA08g30900D	3.6821	1.58134e-13	7.0293e-12	3.17432	3.1615e-10	1.33597e-08	4.10569	7.34857e-14	5.20245e-12	PF00005:ABC transporter|PF07673:Protein of unknown function (DUF1602)	ABC_tran
BnaA04g20940D	-2.15027	7.61556e-30	1.51658e-27	-2.002	1.27503e-18	1.78936e-16	-2.15438	1.77573e-11	9.03024e-10	PF00009:Elongation factor Tu GTP binding domain|PF03144:Elongation factor Tu domain 2|PF14492:Elongation Factor G, domain II|PF03764:Elongation factor G, domain IV	GTP_EFTU
BnaA08g23240D	-0.891957	0.00451579	0.0336344	-1.45952	3.41622e-05	0.000585372	-1.13529	0.00244333	0.0255498	PF00009:Elongation factor Tu GTP binding domain|PF11987:Translation-initiation factor 2	GTP_EFTU
BnaC01g08450D	-11.2895	6.40161e-21	6.36508e-19	-7.45775	1.25073e-15	1.23678e-13	-10.35	2.95352e-15	2.71141e-13	PF00010:Helix-loop-helix DNA-binding domain	HLH
BnaC01g01170D	-6.38218	5.33347e-06	7.74294e-05	-4.72705	0.000688554	0.00863852	-7.17833	1.81961e-06	3.95754e-05	PF00010:Helix-loop-helix DNA-binding domain	HLH
BnaAnng04960D	-3.64986	0.162338	0.518819	-5.40332	0.000120478	0.00181514	-6.07704	0.00119933	0.0138124	PF00010:Helix-loop-helix DNA-binding domain	HLH
BnaCnng57560D	-7.21734	8.44062e-08	1.65349e-06	-6.66715	0.000283376	0.00389484	-5.88578	0.00020736	0.00288771	PF00010:Helix-loop-helix DNA-binding domain	HLH
BnaC04g35310D	-5.36523	1.14721e-22	1.36219e-20	-5.925	2.16063e-21	4.36104e-19	-5.4892	1.45804e-19	2.50972e-17	PF00010:Helix-loop-helix DNA-binding domain	HLH
BnaC05g44630D	-4.1037	7.4278e-37	2.30097e-34	-3.85563	3.54528e-24	9.77103e-22	-3.92266	2.278e-10	9.60851e-09	PF00010:Helix-loop-helix DNA-binding domain	HLH
BnaA07g06270D	-0.697235	0.462019	0.838554	-0.86657	0.525534	0.999999	-3.32458	0.000336074	0.00447604	PF00010:Helix-loop-helix DNA-binding domain	HLH
BnaA08g24520D	-1.32907	0.358871	0.767975	-0.730482	0.536837	0.999999	-3.088	0.00160205	0.017805	PF00010:Helix-loop-helix DNA-binding domain	HLH
BnaA03g26100D	-1.08436	0.000121651	0.0013597	-0.640158	0.125649	0.593201	-1.24527	0.00193481	0.0209499	PF00010:Helix-loop-helix DNA-binding domain	HLH
BnaA05g30270D	2.13073	1.23674e-14	6.30583e-13	2.14225	7.83384e-07	1.82239e-05	1.76315	0.00240449	0.0252032	PF00010:Helix-loop-helix DNA-binding domain	HLH
BnaC03g61610D	2.52226	1.94616e-09	4.92885e-08	3.42743	1.33025e-10	6.04568e-09	2.13884	0.00235277	0.0247502	PF00010:Helix-loop-helix DNA-binding domain	HLH
BnaA07g22200D	6.84081	1.81742e-06	2.8614e-05	6.56774	5.6798e-06	0.000113375	6.50483	1.0076e-05	0.000190121	PF00010:Helix-loop-helix DNA-binding domain	HLH
BnaA10g20610D	-1.98264	0.0198475	0.116977	-3.31587	0.0022162	0.0240305	-2.76238	1.09338e-05	0.000204766	PF00011:Hsp20/alpha crystallin family	-
BnaC06g05390D	3.16082	0.287131	1	3.10817	0.0118197	0.0995626	4.36463	0.000154068	0.00221179	PF00011:Hsp20/alpha crystallin family	-
BnaA10g14590D	4.05155	1.04437e-13	4.71454e-12	5.9569	9.65013e-13	6.02593e-11	4.43136	1.18307e-13	8.14569e-12	PF00011:Hsp20/alpha crystallin family	-
BnaC04g18270D	-2.05754	0.00020918	0.00220807	-2.50976	0.00227547	0.0245993	-2.7028	3.75905e-07	9.34824e-06	PF00012:Hsp70 protein	HSP70
BnaA03g32320D	-5.67313	1.65033e-13	7.31266e-12	-5.58503	1.04217e-14	9.01894e-13	-5.97606	9.75741e-56	4.28283e-52	PF00012:Hsp70 protein|PF10712:NAD-specific glutamate dehydrogenase	HSP70
BnaC01g38510D	3.90481	5.09773e-12	1.8429e-10	4.22271	2.05957e-15	1.95762e-13	4.20176	1.04969e-07	2.83861e-06	PF00012:Hsp70 protein|PF10712:NAD-specific glutamate dehydrogenase	HSP70
BnaC05g42530D	-7.23199	3.52966e-08	7.35039e-07	-7.39187	2.41001e-08	7.43657e-07	-7.52732	1.0362e-08	3.34119e-07	PF00013:KH domain	KH_1
BnaA04g15300D	-1.08758	2.01648e-08	4.34329e-07	-0.787249	0.00155825	0.0176697	-1.15994	0.000615399	0.00761834	PF00013:KH domain	KH_1
BnaA10g18850D	3.33345	1.51963e-06	2.42154e-05	4.04422	2.80431e-08	8.54568e-07	3.57219	2.87805e-07	7.2706e-06	PF00013:KH domain	KH_1
BnaA08g22640D	-1.52032	1.08546e-05	0.000148288	-1.70707	5.55781e-07	1.32942e-05	-1.89393	6.61893e-07	1.57253e-05	PF00022:Actin	Actin
BnaA08g00100D	-2.36064	8.13506e-15	4.25048e-13	-2.64805	2.44527e-15	2.29561e-13	-1.8021	2.23251e-09	7.9364e-08	PF00022:Actin	Actin
BnaA06g12580D	-1.08129	4.96617e-08	1.00916e-06	-1.35493	3.74832e-06	7.7363e-05	-1.05049	8.3042e-05	0.00127308	PF00022:Actin	Actin
BnaC04g55390D	7.08727	1.73652e-08	3.7741e-07	7.21566	1.86822e-08	5.87572e-07	7.13677	2.02276e-08	6.23799e-07	PF00022:Actin	Actin
BnaA09g00560D	-8.73853	1.04199e-30	2.22373e-28	-8.50329	8.72676e-30	4.13023e-27	-11.6353	1.07004e-21	2.40089e-19	PF00025:ADP-ribosylation factor family	Arf
BnaC01g06720D	-5.73932	2.90831e-05	0.000366099	-7.14459	8.39164e-07	1.94097e-05	-7.805	2.24807e-08	6.85243e-07	PF00025:ADP-ribosylation factor family	Arf
BnaCnng06250D	-6.14487	1.74007e-40	6.66389e-38	-6.07964	2.33121e-34	1.75804e-31	-6.9098	2.04025e-31	1.19404e-28	PF00025:ADP-ribosylation factor family	Arf
BnaC07g31870D	-5.90918	0.000176627	0.0018969	-5.6336	0.000256007	0.00355787	-5.51573	0.000486854	0.00618847	PF00025:ADP-ribosylation factor family	Arf
BnaA03g12710D	-0.836513	0.201216	0.586068	-2.52548	0.00289889	0.0303585	-2.70539	0.00112099	0.0129889	PF00025:ADP-ribosylation factor family	Arf
BnaC09g40900D	-1.23823	0.000255357	0.00264149	-1.27817	0.000387626	0.00516829	-1.09941	0.00265483	0.0273984	PF00025:ADP-ribosylation factor family	Arf
BnaA05g32370D	1.10522	7.40388e-07	1.25043e-05	0.994943	0.000178115	0.00258367	1.09006	6.58702e-06	0.000128786	PF00025:ADP-ribosylation factor family	Arf
BnaA04g00470D	1.12602	0.000108437	0.00122338	1.18151	0.000159606	0.00234041	1.34305	0.000161936	0.0023115	PF00025:ADP-ribosylation factor family	Arf
BnaC03g15590D	1.85709	1.06608e-09	2.80718e-08	1.71403	0.000774509	0.00958893	1.57237	0.000437451	0.00562669	PF00025:ADP-ribosylation factor family	Arf
BnaC04g37220D	2.65094	2.67558e-22	3.10296e-20	2.86375	9.97313e-14	7.33565e-12	3.09101	9.63622e-12	5.09595e-10	PF00025:ADP-ribosylation factor family	Arf
BnaC09g07180D	8.04937	2.34785e-10	6.78461e-09	6.98456	1.1273e-07	3.0846e-06	8.53972	4.36541e-11	2.08415e-09	PF00025:ADP-ribosylation factor family	Arf
BnaCnng01100D	3.70405	2.67173e-76	6.42136e-73	3.57415	6.59265e-36	6.28371e-33	3.77234	8.46983e-43	1.35188e-39	PF00025:ADP-ribosylation factor family|PF14009:Domain of unknown function (DUF4228)	Arf
BnaCnng05910D	-6.1978	4.15414e-44	2.01072e-41	-5.8373	0.00403881	0.0403563	-5.81781	1.91345e-30	1.01803e-27	PF00026:Eukaryotic aspartyl protease	Asp
BnaC01g08020D	-3.10243	6.79476e-22	7.54131e-20	-2.7565	1.76789e-09	6.61522e-08	-2.65281	3.14606e-05	0.000530607	PF00027:Cyclic nucleotide-binding domain|PF00520:Ion transport protein	Ion_trans
BnaC04g53510D	-7.18143	4.20766e-08	8.65115e-07	-7.91336	6.14e-10	2.46844e-08	-7.80215	2.31092e-09	8.19666e-08	PF00036:EF hand	efhand
BnaC01g08200D	-6.68394	1.95445e-23	2.52269e-21	-6.26737	2.729e-15	2.5515e-13	-5.76282	1.24616e-18	1.87402e-16	PF00041:Fibronectin type III domain|PF07227:PHD - plant homeodomain finger protein	fn3
BnaA01g06810D	1.30428	1.80895e-09	4.60265e-08	1.07096	0.045483	0.289977	1.15939	0.00179164	0.0196357	PF00041:Fibronectin type III domain|PF07227:PHD - plant homeodomain finger protein	fn3
BnaC03g47760D	3.86123	0.0666695	0.293548	4.46307	0.019261	0.148085	5.41234	0.00227334	0.0240407	PF00043:Glutathione S-transferase, C-terminal domain|PF02798:Glutathione S-transferase, N-terminal domain	GST_N
BnaC01g03050D	-9.48035	9.52562e-15	4.90662e-13	-9.01624	3.87201e-13	2.58232e-11	-9.71499	3.25239e-15	2.95487e-13	PF00046:Homeobox domain	Homeobox
BnaC03g61830D	-5.99216	7.32366e-06	0.000103541	-5.98894	2.07371e-05	0.000371471	-4.37945	7.52293e-05	0.00116629	PF00046:Homeobox domain	Homeobox
BnaC05g48100D	-5.56252	0.000479176	0.0046445	-4.22282	0.00276554	0.0291488	-3.60997	0.00166314	0.0183938	PF00046:Homeobox domain	Homeobox
BnaA10g21190D	-2.37973	2.60171e-06	3.97238e-05	-2.24282	7.98613e-05	0.00125528	-2.2468	0.000139773	0.00202938	PF00046:Homeobox domain	Homeobox
BnaA09g52670D	-0.726243	0.0917105	0.365249	-1.78638	0.00930183	0.0816301	-2.01923	0.00183036	0.0199907	PF00046:Homeobox domain	Homeobox
BnaC06g24420D	2.80661	0.148849	0.493419	4.02159	0.0137219	0.11252	5.24906	0.000211127	0.00293725	PF00046:Homeobox domain	Homeobox
BnaC09g07850D	7.90989	1.00193e-09	2.64927e-08	7.38785	2.46705e-07	6.31023e-06	6.49685	6.37447e-07	1.52316e-05	PF00046:Homeobox domain	Homeobox
BnaC01g00960D	-8.50875	7.65327e-34	1.97568e-31	-9.12519	9.72311e-35	7.66963e-32	-11.0994	3.47172e-25	1.12878e-22	PF00046:Homeobox domain|PF02183:Homeobox associated leucine zipper	HALZ
BnaA06g39210D	-1.96508	1.17547e-06	1.90447e-05	-1.34628	0.10777	0.537449	-2.41688	1.30559e-05	0.000239275	PF00046:Homeobox domain|PF02183:Homeobox associated leucine zipper	HALZ
BnaC06g32060D	1.23971	0.017391	0.105194	0.938624	0.20022	0.779126	1.43754	0.000827419	0.00992126	PF00046:Homeobox domain|PF02183:Homeobox associated leucine zipper	Homeobox
BnaC01g40760D	-5.83748	3.61765e-07	6.44226e-06	-7.8939	1.53893e-09	5.79004e-08	-6.36035	1.86685e-08	5.77817e-07	PF00063:Myosin head (motor domain)	Myosin_head
BnaC01g04980D	-7.45049	1.10111e-08	2.47492e-07	-7.54997	1.45311e-08	4.64468e-07	-5.035	7.61582e-08	2.10737e-06	PF00063:Myosin head (motor domain)|PF02736:Myosin N-terminal SH3-like domain	Myosin_head
BnaC01g02400D	-11.8397	3.99725e-23	4.99298e-21	-7.64996	8.0222e-62	5.00483e-58	-10.2833	1.04498e-29	5.20482e-27	PF00067:Cytochrome P450	p450
BnaC06g25040D	-5.54954	4.77769e-09	1.13731e-07	-5.74949	3.28574e-09	1.16764e-07	-8.06485	5.85151e-09	1.94946e-07	PF00067:Cytochrome P450	p450
BnaC05g39060D	-5.45643	4.94717e-06	7.22586e-05	-7.55621	1.36778e-07	3.68532e-06	-8.02085	7.9334e-10	3.05625e-08	PF00067:Cytochrome P450	p450
[truncated: 4,679 more rows]

## Sheet: (B) CS Genotype
Table S2 B. Differentially expressed genes (DEGs) in CS genotype. In this case, comparisons were made between inoculated and uninoculated root tissues of clubroot susceptible (CS) genotype. Sus1 = Susceptible genotype at 1 day post inoculation, Sus4 = Susceptible genotype at 4 day post inoculation, and Sus7 = Suceptible genotype at 7 day post inoculation, T indicates pathogen inoculated and C ind…
[truncated: 324 more rows]

[truncated: 1 more sheets: (A) CR Genotype]
