# Supplementary material for: Early-stage responses to Plasmodiophora brassicae at the transcriptome and metabolome levels in clubroot resistant and susceptible oilseed Brassica napus
Source: Royal Society of Chemistry journal article supplement (doi:10.1039/d2mo00251e), 2022-11-10
Supplement: d2mo00251e12.xlsx [file d2mo00251e12.xlsx]

## Sheet: (A) Auxin_Cytokinin
Table S3 A. Differentially expressed genes (DEGs) related to auxin and cytokinin. In this case, comparisons were made between inoculated clubroot resistant (CR) and inoculated clubroot susceptible (CS) genotypes. Res1 = Resistant genotype at 1 day post inoculation, Res4 = Resistant genotype at 4 day post inoculation, and Res7 = Resistant genotype at 7 day post inoculation. Sus1 = Susceptible geno…
gene_id	Res1_TvsSus1_T_log2FoldChange	Res1_TvsSus1_T_padj	Res4_TvsSus4_T_log2FoldChange	Res4_TvsSus4_T_padj	Res7_TvsSus7_T_log2FoldChange	Res7_TvsSus7_T_padj	gene_description	tf_family
BnaC05g47100D	-8.20663	2.7265e-36	-8.54551	2.01227e-28	-8.43472	7.00457e-32	O24407.1 Auxin-responsive protein IAA16; AltName: Full=Indoleacetic acid-induced protein 16 && PF02309:AUX/IAA family	-
BnaC03g05830D	-4.82371	3.77039e-08	-6.15185	1.94967e-05	-7.91473	3.6153e-07	Q9FZ87.1 Indole-3-acetic acid-amido synthetase GH3.17; AltName: Full=Auxin-responsive GH3-like protein 17; Short=AtGH3-17 && PF03321:GH3 auxin-responsive promoter	-
BnaC01g07200D	-7.38564	3.11257e-07	-7.32376	7.94689e-07	-7.27111	3.41953e-06	PF02519: Auxin responsive protein	Auxin_inducible
BnaC01g01570D	-5.62493	3.96925e-43	-6.07563	3.38738e-09	-6.6211	2.24186e-20	PF03321: GH3 auxin-responsive promoter	-
BnaC01g08330D	-3.2179	8.55861e-09	-4.07422	2.41207e-10	-3.77997	2.73694e-13	PF02362: B3 DNA binding domain|PF06507:Auxin response factor	Auxin_resp
BnaA09g05840D	-1.26555	0.000529132	-1.35543	0.0152943	-1.39636	0.0250663	PF02362: B3 DNA binding domain|PF06507:Auxin response factor|PF02309:AUX/IAA family	Auxin_resp
BnaC04g18710D	4.95433	4.71544e-28	4.80198	3.25604e-18	4.58717	1.13916e-14	PF06507: Auxin response factor|PF02309:AUX/IAA family|PF02362:B3 DNA binding domain	Auxin_resp
BnaCnng28110D	8.21083	2.65058e-09	8.34904	3.044e-07	9.16976	3.95076e-11	PF03321: GH3 auxin-responsive promoter	-
BnaC01g01490D	-9.54677	8.15381e-13	-9.10133	1.18806e-09	-6.66329	0.00118328	sp|Q9FF18|C7351_ARATH Cytokinin hydroxylase OS=Arabidopsis thaliana OX=3702 GN=CYP735A1 PE=1 SV=1
BnaC01g01580D	-6.22411	0.000187883	-5.93771	0.00265434	-6.2858	0.000215382	sp|Q9FF18|C7351_ARATH Cytokinin hydroxylase OS=Arabidopsis thaliana OX=3702 GN=CYP735A1 PE=1 SV=1
BnaC01g01540D	-4.78442	6.00027e-11	-4.54901	7.77699e-07	-2.82383	2.46406e-05	sp|Q9FF18|C7351_ARATH Cytokinin hydroxylase OS=Arabidopsis thaliana OX=3702 GN=CYP735A1 PE=1 SV=1
BnaC03g39830D	1.72613	9.50639e-05	2.09196	0.0121537	1.42301	0.0466565	sp|Q3S4A7|AHK5_ARATH Histidine kinase 5 OS=Arabidopsis thaliana OX=3702 GN=AHK5 PE=1 SV=1
BnaA09g51710D	1.73933	7.13059e-05	1.76691	0.0122357	1.87168	5.16287e-08	sp|Q9FF18|C7351_ARATH Cytokinin hydroxylase OS=Arabidopsis thaliana OX=3702 GN=CYP735A1 PE=1 SV=1
BnaA04g16010D	2.01461	5.75922e-06	1.83708	0.000586189	2.14421	9.7005e-05	sp|Q93WC9|IPT3_ARATH Adenylate isopentenyltransferase 3, chloroplastic OS=Arabidopsis thaliana OX=3702 GN=IPT3 PE=1 SV=1
BnaA08g15660D	4.29144	0.0204821	4.66249	0.00180561	5.00654	6.23824e-05	sp|Q9FF18|C7351_ARATH Cytokinin hydroxylase OS=Arabidopsis thaliana OX=3702 GN=CYP735A1 PE=1 SV=1

## Sheet: (B) Salicylic Acid
Table S3. Differentially expressed genes (DEGs) related to salicylic acid. In this case, comparisons were made between inoculated clubroot resistant (CR) and inoculated clubroot susceptible (CS) genotypes. Res1 = Resistant genotype at 1 day post inoculation, Res4 = Resistant genotype at 4 day post inoculation, and Res7 = Resistant genotype at 7 day post inoculation. Sus1 = Susceptible genotype at…
gene_id+A1:U7	Res1_TvsSus1_T_log2FoldChange	Res1_TvsSus1_T_padj	Res4_TvsSus4_T_log2FoldChange	Res4_TvsSus4_T_padj	Res7_TvsSus7_T_log2FoldChange	Res7_TvsSus7_T_padj	gene_description	tf_family
BnaC01g00120D	-1.69302	4.15189e-08	-1.31597	0.112008	-1.96465	9.85599e-06	Q945F0.1 RecName: Full=Protein DETOXIFICATION 47, chloroplastic; Short=AtDTX47; AltName: Full=Multidrug and toxic compound extrusion protein 47; Short=MATE protein 47; AltName: Full=Protein ENHANCED DISEASE SUSCEPTIBILITY 5; Short=Protein EDS5; AltName: Full=Protein IMPORTANT FOR THE ARR PATHWAY 1; Short=Protein IAP1; AltName: Full=Protein SALICYLIC ACID INDUCTION DEFICIENT 1; Short=Protein SID1;…	MatE
BnaC06g35540D	1.57478	2.05591e-06	1.03979	0.433068	0.764995	0.643338	Q9S7H8.2 RecName: Full=Isochorismate synthase 1, chloroplastic; Short=AtIcs1; Short=IcsI; AltName: Full=Enhanced disease susceptibility 16; Short=Eds16; AltName: Full=Isochorismate mutase 1; AltName: Full=Salicylic acid induction deficient 2; Short=Sid2; AltName: Full=menF-like protein 1; Flags: Precursor && PF00425:chorismate binding enzyme	-
BnaA03g24410D	1.28241	0.00884175	1.44414	0.166819	0.775591	0.684006	Q9ZSA8.1 RecName: Full=Protein DMR6-LIKE OXYGENASE 1; AltName: Full=2-oxoglutarate (2OG)-Fe(II) oxygenase-like protein DLO1; AltName: Full=Protein SENESCENCE-ASSOCIATED GENE 108; AltName: Full=Salicylate 3-hydroxylase DLO1; Short=S3H DLO1; Short=SA 3-hydroxylase DLO1; Short=Salicylic acid 3-hydroxylase DLO1 && PF03171:2OG-Fe(II) oxygenase superfamily|PF14226:non-haem dioxygenase in morphine synth…	2OG-FeII_Oxy
BnaA03g34720D	-7.79597	3.06059e-08	-7.67057	9.84471e-08	-8.4091	4.72745e-09	PF07734:F-box associated	-
BnaA03g19190D	-4.43143	0.0331463	-3.61668	0.0374137	-7.00492	3.06152e-05	Q93WU8.2 Probable WRKY transcription factor 54; AltName: Full=WRKY DNA-binding protein 54 && PF03106:WRKY DNA -binding domain	WRKY

## Sheet: (C) Jasmonic-Ethylene
Table S3. Differentially expressed genes (DEGs) related to jasmonic acid and ethylene. In this case, comparisons were made between inoculated clubroot resistant (CR) and inoculated clubroot susceptible (CS) genotypes. Res1 = Resistant genotype at 1 day post inoculation, Res4 = Resistant genotype at 4 day post inoculation, and Res7 = Resistant genotype at 7 day post inoculation. Sus1 = Susceptible…
gene_id	Res1_TvsSus1_T_log2FoldChange	Res1_TvsSus1_T_padj	Res4_TvsSus4_T_log2FoldChange	Res4_TvsSus4_T_padj	Res7_TvsSus7_T_log2FoldChange	Res7_TvsSus7_T_padj	gene_description	tf_family
BnaC01g05620D	-7.84047	2.11993e-17	-5.24066	1.3304e-11	-9.29505	3.74009e-12	Q9M080.1 Ethylene-responsive transcription factor ERF043 && PF00847:AP2 domain	AP2
BnaC01g01290D	-6.49371	2.09612e-05	-7.50019	9.88862e-07	-9.05878	2.71111e-08	Q38914.2 AP2-like ethylene-responsive transcription factor ANT; AltName: Full=Complementing a protein kinase C mutant protein 1; AltName: Full=Protein AINTEGUMENTA; AltName: Full=Protein DRAGON; AltName: Full=Protein OVULE MUTANT && PF00847:AP2 domain	AP2
BnaA03g33790D	-2.06439	7.12972e-25	-1.86785	5.7567e-13	-2.00099	7.22071e-08	O80340.1 Ethylene-responsive transcription factor 4; Short=AtERF4; AltName: Full=Ethylene-responsive element-binding factor 4; Short=EREBP-4; AltName: Full=Protein RELATED TO APETALA2 5 && PF00847:AP2 domain	AP2
BnaC09g00690D	-0.567299	0.458444	0.303484	0.999999	-1.05826	0.735168	Q6I581.1 Jasmonic acid-amido synthetase JAR1; AltName: Full=Auxin-responsive GH3-like protein 5; Short=OsGH3-5; AltName: Full=Indole-3-acetic acid-amido synthetase GH3.5; AltName: Full=Jasmonate-amino acid synthetase JAR1; AltName: Full=Protein JASMONATE RESISTANT 1; Short=OsJAR1 && PF03321:GH3 auxin-responsive promoter	-
BnaC02g48800D	1.28999	0.0427541	1.08077	0.93854	0.801846	0.932888	Q9FKG1.1 Ethylene-responsive transcription factor ERF104 && PF00847:AP2 domain	AP2
BnaA01g02720D	1.27833	2.52583e-07	1.28964	0.0841309	1.61524	0.00013424	Q9SZ06.1 Ethylene-responsive transcription factor ERF109 && PF00847:AP2 domain	AP2
BnaA08g01300D	2.41876	9.16432e-20	2.48578	6.11958e-06	2.39265	3.13252e-06	O80340.1 Ethylene-responsive transcription factor 4; Short=AtERF4; AltName: Full=Ethylene-responsive element-binding factor 4; Short=EREBP-4; AltName: Full=Protein RELATED TO APETALA2 5 && PF00847:AP2 domain	AP2
BnaC06g33570D	7.8663	3.2727e-08	8.6448	8.87875e-08	7.2397	5.58005e-05	Q8H0T5.1 Ethylene-responsive transcription factor ERF073 && PF00847:AP2 domain	AP2
