# Supplementary material for: Early-stage responses to Plasmodiophora brassicae at the transcriptome and metabolome levels in clubroot resistant and susceptible oilseed Brassica napus
Source: Royal Society of Chemistry journal article supplement (doi:10.1039/d2mo00251e), 2022-11-10
Supplement: d2mo00251e13.xlsx [file d2mo00251e13.xlsx]

## Sheet: sugar
Table S4. Differentially expressed genes (DEGs) related to sugar. In this case, comparisons were made between inoculated clubroot resistant (CR) and inoculated clubroot susceptible (CS) genotypes. Res1 = Resistant genotype at 1 day post inoculation, Res4 = Resistant genotype at 4 day post inoculation, and Res7 = Resistant genotype at 7 day post inoculation. Sus1 = Susceptible genotype at 1 day po…
gene_id	Res1_TvsSus1_T_log2FoldChange	Res1_TvsSus1_T_padj	Res4_TvsSus4_T_log2FoldChange	Res4_TvsSus4_T_padj	Res7_TvsSus7_T_log2FoldChange	Res7_TvsSus7_T_padj	gene_description	tf_family
BnaC01g05570D	-8.58299	5.27719e-32	-9.7026	5.41724e-22	-11.4776	9.84645e-17	Q9M076.1 RecName: Full=ATP-dependent 6-phosphofructokinase 6; Short=ATP-PFK 6; Short=Phosphofructokinase 6; AltName: Full=Phosphohexokinase 6 && PF00365:Phosphofructokinase	PFK
BnaC01g04670D	-9.11697	2.6564e-12	-9.19707	4.95051e-11	-10.0916	4.67948e-14	Q9SZC9.1 RecName: Full=Copper-transporting ATPase PAA1, chloroplastic; AltName: Full=Protein HEAVY METAL ATPASE 6; AltName: Full=Protein glucose insensitive root 1; Flags: Precursor && PF00702:haloacid dehalogenase-like hydrolase|PF00122:E1-E2 ATPase|PF00403:Heavy-metal-associated domain	E1-E2_ATPase
BnaC05g45870D	-8.51274	1.40605e-13	-6.76979	2.15052e-12	-9.69194	8.25486e-12	PF00083:Sugar (and other) transporter	Sugar_tr
BnaAnng34290D	-8.9926	3.18316e-34	-7.98866	7.11511e-26	-9.58735	5.11925e-22	Q9FJJ3.1 RecName: Full=Probable inactive poly [ADP-ribose] polymerase SRO5; AltName: Full=Protein SIMILAR TO RCD ONE 5 && PF12174:RCD1-SRO-TAF4 (RST) plant domain	-
BnaC07g27090D	-8.852	2.98065e-11	-8.42505	1.05801e-08	-8.95892	9.88029e-11	Q00917.3 RecName: Full=Sucrose synthase 2; Short=AtSUS2; AltName: Full=Sucrose-UDP glucosyltransferase 2 && PF00534:Glycosyl transferases group 1|PF00862:Sucrose synthase	Glycos_transf_1
BnaCnng53530D	-9.04626	9.46402e-11	-7.07639	8.22551e-05	-8.32896	3.77056e-08	Q8GXR2.2 RecName: Full=Probable polyol transporter 6 && PF00083:Sugar (and other) transporter	Sugar_tr
BnaA09g00530D	-7.11929	4.74325e-06	-7.43579	7.50543e-06	-7.79799	6.54704e-07	PF00083:Sugar (and other) transporter	Sugar_tr
BnaCnng67460D	-7.12214	1.7131e-05	-6.26974	0.00595674	-7.20582	0.000276232	Q9XIH7.1 RecName: Full=Putative polyol transporter 1 && PF00083:Sugar (and other) transporter	Sugar_tr
BnaCnng06220D	-4.90479	6.29512e-30	-5.91664	2.93606e-10	-6.56882	2.8445e-12	PF00083:Sugar (and other) transporter	Sugar_tr
BnaC05g46980D	-5.78169	1.15049e-07	-6.13218	5.08753e-08	-6.52888	3.72279e-06	PF07883:Cupin domain|PF02502:Ribose/Galactose Isomerase	LacAB_rpiB
BnaC05g48220D	-6.83581	3.63317e-19	-6.72087	3.59056e-13	-6.36423	5.6383e-15	PF01238:Phosphomannose isomerase type I	-
BnaA06g14480D	-5.94621	0.000794325	-6.81695	3.54962e-05	-6.00929	0.00107455	PF00535:Glycosyl transferase family 2	Glycos_transf_2
BnaC01g01890D	-6.80351	2.09123e-05	-6.50366	0.000242372	-5.97627	0.00222082	Q40784.1 RecName: Full=Putative glucose-6-phosphate 1-epimerase; AltName: Full=Putative D-hexose-6-phosphate mutarotase; AltName: Full=Putative apospory-associated protein C && PF01263:Aldose 1-epimerase	Aldose_epim
BnaC05g46130D	-5.84587	5.39068e-06	-4.80964	2.91614e-05	-5.46766	2.476e-05	PF04043:Plant invertase/pectin methylesterase inhibitor|PF01095:Pectinesterase	-
BnaCnng53900D	-5.88101	1.49336e-47	-6.30851	4.37628e-23	-5.46718	1.6809e-33	Q9M9P3.1 RecName: Full=UTP--glucose-1-phosphate uridylyltransferase 2; AltName: Full=UDP-glucose pyrophosphorylase 2; Short=AtUGP2; Short=UDPGP 2; Short=UGPase 2 && PF01704:UTP--glucose-1-phosphate uridylyltransferase	-
BnaA08g31100D	-4.3659	2.87581e-19	-4.09119	2.30827e-06	-5.00308	1.19221e-06	PF00479:Glucose-6-phosphate dehydrogenase, NAD binding domain|PF02781:Glucose-6-phosphate dehydrogenase, C-terminal domain	G6PD_C
BnaC02g46740D	-3.12897	2.44538e-14	-3.65065	1.54462e-13	-4.53453	2.48064e-10	PF04043:Plant invertase/pectin methylesterase inhibitor	-
BnaC05g47040D	-4.02398	1.15049e-12	-4.11504	2.37461e-11	-4.50225	1.15965e-10	Q9S726.1 RecName: Full=Probable ribose-5-phosphate isomerase 3, chloroplastic; AltName: Full=Phosphoriboisomerase 3; AltName: Full=Protein EMBRYO DEFECTIVE 3119; Flags: Precursor && PF06026:Ribose 5-phosphate isomerase A (phosphoriboisomerase A)	Rib_5-P_isom_A
BnaC03g05780D	-3.98444	3.50547e-51	-3.79904	1.28981e-12	-4.0703	1.20586e-14	Q9FY99.2 RecName: Full=Glucose-6-phosphate 1-dehydrogenase 2, chloroplastic; Short=G6PD2; Short=G6PDH2; Flags: Precursor && PF00479:Glucose-6-phosphate dehydrogenase, NAD binding domain|PF02781:Glucose-6-phosphate dehydrogenase, C-terminal domain	G6PD_C
BnaC09g39010D	-3.22289	1.82435e-12	-2.49459	0.0329276	-3.57293	3.44461e-07	PF00083:Sugar (and other) transporter	Sugar_tr
BnaC05g06460D	-2.77405	6.20113e-11	-2.93623	0.0413182	-3.26181	9.29456e-05	PF00083:Sugar (and other) transporter	Sugar_tr
BnaA04g01410D	-2.72712	2.9792e-06	-2.3834	0.011083	-3.05601	0.0004092	Q6NUT3.2 RecName: Full=Major facilitator superfamily domain-containing protein 12 && PF13347:MFS/sugar transport protein	-
BnaAnng25620D	-2.52937	4.66103e-23	-2.79509	4.87206e-12	-2.53169	6.46481e-19	PF01704:UTP--glucose-1-phosphate uridylyltransferase	-
BnaC03g13370D	-4.21311	3.76433e-19	-2.83809	6.02721e-07	-2.47292	7.80104e-09	PF00365:Phosphofructokinase	PFK
BnaA04g15200D	-1.78701	5.4556e-09	-1.70555	0.000103197	-1.611	1.90752e-06	P0A8Y5.1 RecName: Full=Sugar phosphatase YidA >P0A8Y6.1 RecName: Full=Sugar phosphatase YidA >P0A8Y7.1 RecName: Full=Sugar phosphatase YidA && PF02130:Uncharacterized protein family UPF0054|PF08282:haloacid dehalogenase-like hydrolase	Hydrolase_3
BnaCnng41250D	-1.25423	3.69094e-10	-1.36706	2.1095e-05	-1.46864	8.10702e-07	PF00982:Glycosyltransferase family 20|PF02358:Trehalose-phosphatase	-
BnaA03g26900D	-1.7053	5.41212e-09	-1.64807	0.00134723	-1.39422	0.0325477	PF03407:Nucleotide-diphospho-sugar transferase	-
BnaA05g34510D	1.63006	1.57925e-07	1.28194	0.010141	1.2592	0.000310108	PF00534:Glycosyl transferases group 1|PF15924:ALG11 mannosyltransferase N-terminus	Glycos_transf_1
BnaA01g04620D	1.07113	1.26177e-08	1.33098	4.46568e-05	1.28751	6.85755e-06	Q9SUV2.1 RecName: Full=Probable sugar phosphate/phosphate translocator At4g32390 && PF03151:Triose-phosphate Transporter family	-
BnaA05g30520D	1.08317	9.51081e-05	1.26225	0.000108747	1.30884	2.86307e-08	Q9M8Z7.1 RecName: Full=Sterol 3-beta-glucosyltransferase UGT80A2; AltName: Full=UDP-glucose:sterol glucosyltransferase 80A2 && PF03033:Glycosyltransferase family 28 N-terminal domain|PF00201:UDP-glucoronosyl and UDP-glucosyl transferase	UDPGT
BnaA07g15160D	1.47758	3.76864e-10	1.89551	0.048863	1.40956	4.26372e-07	PF02781:Glucose-6-phosphate dehydrogenase, C-terminal domain|PF00479:Glucose-6-phosphate dehydrogenase, NAD binding domain	G6PD_C
BnaC06g41950D	1.139	0.00101881	1.50765	0.000626719	1.48635	5.11762e-05	PF04043:Plant invertase/pectin methylesterase inhibitor|PF01095:Pectinesterase	-
BnaA09g01980D	2.12953	2.61407e-13	2.29913	0.000756836	1.57216	1.48045e-06	Q9LK23.1 RecName: Full=Glucose-6-phosphate 1-dehydrogenase, cytoplasmic isoform 1; AltName: Full=G6PDH5; Short=G6PD5 && PF02781:Glucose-6-phosphate dehydrogenase, C-terminal domain|PF00479:Glucose-6-phosphate dehydrogenase, NAD binding domain	G6PD_C
BnaC03g06530D	1.92076	6.50583e-13	1.69675	4.28121e-06	1.95933	7.10226e-12	Q40784.1 RecName: Full=Putative glucose-6-phosphate 1-epimerase; AltName: Full=Putative D-hexose-6-phosphate mutarotase; AltName: Full=Putative apospory-associated protein C && PF01263:Aldose 1-epimerase	Aldose_epim
BnaC03g51710D	3.05593	1.19049e-12	2.76568	0.0415864	2.76516	0.00271537	P17407.1 RecName: Full=21 kDa protein; AltName: Full=1.2 protein; Flags: Precursor && PF04043:Plant invertase/pectin methylesterase inhibitor	-
BnaC01g16480D	2.88537	3.26103e-22	2.56743	8.64646e-14	2.7985	1.68954e-12	PF00342:Phosphoglucose isomerase	-
BnaA05g04610D	2.7672	2.01465e-23	3.46715	4.87988e-05	3.29058	5.49163e-11	PF04043:Plant invertase/pectin methylesterase inhibitor|PF01095:Pectinesterase	-
BnaC06g42870D	3.26317	1.62434e-14	3.18884	0.000156314	3.41828	6.94539e-11	Q40784.1 RecName: Full=Putative glucose-6-phosphate 1-epimerase; AltName: Full=Putative D-hexose-6-phosphate mutarotase; AltName: Full=Putative apospory-associated protein C && PF01263:Aldose 1-epimerase	Aldose_epim
BnaC03g08340D	3.21291	2.85894e-21	3.20555	0.000629445	3.69529	3.84893e-07	PF01704:UTP--glucose-1-phosphate uridylyltransferase	-
BnaA05g06230D	5.07361	1.04693e-15	5.66953	8.83324e-05	6.37979	6.50728e-17	PF00083:Sugar (and other) transporter	Sugar_tr
BnaA08g27240D	6.75963	3.49087e-12	5.93366	7.25283e-10	7.0468	1.6697e-07	PF01095:Pectinesterase|PF04043:Plant invertase/pectin methylesterase inhibitor	-
BnaC08g06220D	5.41682	1.05532e-16	6.57249	6.26998e-11	7.08883	1.71414e-12	RecName: Full=Probable phosphoglucomutase, cytoplasmic 1; Short=PGM 1; AltName: Full=Glucose phosphomutase 1 && PF01221:Dynein light chain type 1|PF00408:Phosphoglucomutase/phosphomannomutase, C-terminal domain	-
BnaC01g38690D	7.8282	5.69384e-08	7.50504	3.66081e-07	8.29877	7.27627e-09	Q9FYE5.1 RecName: Full=Probable sugar phosphate/phosphate translocator At5g04160 && PF03151:Triose-phosphate Transporter family	-
BnaCnng53590D	10.2526	1.45552e-15	10.2721	5.67914e-15	8.68858	1.47226e-12	P46267.1 RecName: Full=Fructose-1,6-bisphosphatase, cytosolic; Short=FBPase; AltName: Full=D-fructose-1,6-bisphosphate 1-phosphohydrolase && PF00316:Fructose-1-6-bisphosphatase|PF13975:gag-polyprotein putative aspartyl protease	-
BnaC09g06770D	8.42632	4.03437e-10	8.56435	4.04523e-10	8.9388	7.99242e-11	Q8LES0.1 RecName: Full=CMP-sialic acid transporter 5; Short=CMP-SA-Tr 5; Short=CMP-Sia-Tr 5 && PF04142:Nucleotide-sugar transporter	-
BnaC01g01140D	-7.88273	6.0228e-204	-6.91214	1.04014e-40	-6.94473	6.37957e-58	PF01293:Phosphoenolpyruvate carboxykinase
BnaA08g17580D	6.48165	1.47362e-05	4.84841	7.02343e-05	6.21199	0.00012194	PF00293:NUDIX domain
