# Supplementary material for: Early-stage responses to Plasmodiophora brassicae at the transcriptome and metabolome levels in clubroot resistant and susceptible oilseed Brassica napus
Source: Royal Society of Chemistry journal article supplement (doi:10.1039/d2mo00251e), 2022-11-10
Supplement: d2mo00251e14.xlsx [file d2mo00251e14.xlsx]

## Sheet: organic acids
Table S5. Differentially expressed genes (DEGs) related to organic acids. In this case, comparisons were made between inoculated clubroot resistant (CR) and inoculated clubroot susceptible (CS) genotypes. Res1 = Resistant genotype at 1 day post inoculation, Res4 = Resistant genotype at 4 day post inoculation, and Res7 = Resistant genotype at 7 day post inoculation. Sus1 = Susceptible genotype at …
gene_id	Res1_TvsSus1_T_log2FoldChange	Res1_TvsSus1_T_padj	Res4_TvsSus4_T_log2FoldChange	Res4_TvsSus4_T_padj	Res7_TvsSus7_T_log2FoldChange	Res7_TvsSus7_T_padj	gene_description
BnaCnng44550D	-7.67644	1.67347e-08	-8.82504	2.64203e-08	-9.50908	2.33294e-12	Q93VK0.2 RecName: Full=Phosphoenolpyruvate carboxylase kinase 2; Short=AtPPCK2 PF00069:Protein kinase domain
BnaA08g26420D	-7.65871	1.77736e-42	-6.18995	3.16541e-45	-7.54164	7.10048e-32	PF16114:ATP citrate lyase citrate-binding|PF08442:ATP-grasp domain
BnaC01g02790D	-4.74766	6.31924e-125	-5.16491	1.75308e-54	-4.74428	2.53477e-51	Q42560.2 RecName: Full=Aconitate hydratase 1; Short=Aconitase 1; AltName: Full=Citrate hydro-lyase 1 PF00330:Aconitase family (aconitate hydratase)|PF00694:Aconitase C-terminal domain
BnaC01g31270D	-2.28207	4.19255e-24	-2.37272	3.2959e-08	-2.36192	1.68247e-18	Q9LIK0.1 RecName: Full=Plastidial pyruvate kinase 1, chloroplastic; Short=PK1; Short=PKp1; AltName: Full=Pyruvate kinase II; AltName: Full=Pyruvate kinase isozyme A; Short=PKP-ALPHA; Flags: Precursor PF02887:Pyruvate kinase, alpha/beta domain|PF00224:Pyruvate kinase, barrel domain
BnaA06g27940D	-1.18798	0.000852978	-1.01243	0.376329	-1.28262	0.0262153	PF00390:Malic enzyme, N-terminal domain|PF03949:Malic enzyme, NAD binding domain
BnaA03g02560D	-1.54168	1.11288e-12	-1.36076	0.00468468	-1.27358	0.000683472	PF02887:Pyruvate kinase, alpha/beta domain|PF00224:Pyruvate kinase, barrel domain
BnaA05g28740D	2.25734	2.24444e-06	2.01139	4.77305e-06	1.74605	0.00603077	PF00180:Isocitrate/isopropylmalate dehydrogenase
BnaA05g34260D	1.36693	0.0105968	2.38005	0.00542734	1.76748	0.0426042	PF00311:Phosphoenolpyruvate carboxylase
BnaA05g34440D	2.19573	1.77624e-11	2.39064	1.77695e-12	2.05919	1.70537e-05	Q9ZW85.1 RecName: Full=3-isopropylmalate dehydratase small subunit 3; AltName: Full=AtLEUD3; AltName: Full=Isopropylmalate isomerase small subunit 3; Flags: Precursor PF00694:Aconitase C-terminal domain
BnaC06g09980D	1.60486	2.55538e-15	1.95895	0.012764	2.1948	1.77905e-08	PF00311:Phosphoenolpyruvate carboxylase
BnaC09g07800D	2.94672	4.94915e-25	3.1752	2.99218e-22	3.23367	7.14279e-19	O82663.1 RecName: Full=Succinate dehydrogenase [ubiquinone] flavoprotein subunit 1, mitochondrial; AltName: Full=Flavoprotein subunit 1 of complex II; Short=FP; Flags: Precursor PF02910:Fumarate reductase flavoprotein C-term|PF00890:FAD binding domain
BnaAnng15280D	3.81105	8.36424e-07	3.88471	2.76262e-05	3.43159	0.000165319	P20115.3 RecName: Full=Citrate synthase 4, mitochondrial; Flags: Precursor PF00285:Citrate synthase
BnaC04g23180D	5.72075	1.2233e-05	6.80223	2.60895e-06	5.68928	3.45967e-05	Q42806.1 RecName: Full=Pyruvate kinase, cytosolic isozyme; Short=PK PF00224:Pyruvate kinase, barrel domain|PF02887:Pyruvate kinase, alpha/beta domain
BnaC02g39080D	7.00487	1.65494e-13	7.5623	7.18215e-10	6.83494	5.25037e-13	PF00549:CoA-ligase|PF00285:Citrate synthase
BnaA10g00550D	7.06158	4.35831e-06	7.07665	5.70428e-06	7.20993	1.71282e-05	Pyruvate kinase, alpha/beta domain
BnaA08g29410D	7.31945	9.96488e-08	8.35533	2.05248e-09	8.69524	5.79418e-09	PF02892:BED zinc finger|PF04937:Protein of unknown function (DUF 659)
