# Supplementary material for: Early-stage responses to Plasmodiophora brassicae at the transcriptome and metabolome levels in clubroot resistant and susceptible oilseed Brassica napus
Source: Royal Society of Chemistry journal article supplement (doi:10.1039/d2mo00251e), 2022-11-10
Supplement: d2mo00251e15.xlsx [file d2mo00251e15.xlsx]

## Sheet: (A) RLKs
Table S6. Differentially expressed genes (DEGs) related to RLKs and MAMPs. In this case, comparisons were made between inoculated clubroot resistant (CR) and inoculated clubroot susceptible (CS) genotypes. Res1 = Resistant genotype at 1 day post inoculation, Res4 = Resistant genotype at 4 day post inoculation, and Res7 = Resistant genotype at 7 day post inoculation. Sus1 = Susceptible genotype at…
gene_id	Res1_TvsSus1_T_log2FoldChange	Res1_TvsSus1_T_padj	Res4_TvsSus4_T_log2FoldChange	Res4_TvsSus4_T_padj	Res7_TvsSus7_T_log2FoldChange	Res7_TvsSus7_T_padj	gene_description	tf_family
BnaC01g04780D	-8.71446	1.03286e-47	-7.92087	2.88229e-17	-8.55402	4.71025e-36	PF08263:Leucine rich repeat N-terminal domain|PF00069:Protein kinase domain	Pkinase
BnaC01g05710D	-7.18804	2.70733e-07	-4.9184	1.95769e-08	-5.67844	3.88717e-07	O65530.1 RecName: Full=Proline-rich receptor-like protein kinase PERK14; AltName: Full=Proline-rich extensin-like receptor kinase 14; Short=AtPERK14 && PF07714:Protein tyrosine kinase	Pkinase_Tyr
BnaA04g18590D	-3.50789	1.11241e-29	-3.29123	1.02612e-13	-3.2637	3.28709e-05	PF00069:Protein kinase domain|PF13855:Leucine rich repeat	Pkinase
BnaC03g29930D	-1.89006	0.000164747	-2.20128	0.0187293	-2.43077	0.00113615	PF00069:Protein kinase domain|PF01657:Salt stress response/antifungal	Pkinase
BnaC03g50640D	-2.19668	0.000113832	-2.36689	0.0351944	-1.98983	0.0480477	PF00069:Protein kinase domain|PF08263:Leucine rich repeat N-terminal domain|PF13855:Leucine rich repeat	Pkinase
BnaA03g26400D	-2.36253	3.54238e-13	-2.16127	1.4951e-07	-1.93181	3.71842e-07	Q8RWW0.1 RecName: Full=Receptor-like serine/threonine-protein kinase ALE2; AltName: Full=Protein ABNORMAL LEAF SHAPE 2; Flags: Precursor && PF07714:Protein tyrosine kinase	Pkinase_Tyr
BnaA02g00450D	1.37156	3.82101e-09	1.08832	0.00457725	1.17637	0.00110024	PF13855:Leucine rich repeat|PF00069:Protein kinase domain|PF08263:Leucine rich repeat N-terminal domain	Pkinase
BnaC03g48810D	2.86466	7.61645e-10	2.8597	7.22962e-06	3.23211	3.08617e-07	PF07714:Protein tyrosine kinase	Pkinase_Tyr
BnaC01g38950D	2.92864	6.33095e-11	3.31986	2.1767e-19	3.92077	5.13273e-21	Q9LFP7.1 RecName: Full=Probable receptor-like protein kinase At5g15080 && PF00069:Protein kinase domain	Pkinase
BnaC06g35100D	5.7095	0.00154978	5.82337	0.00140343	5.88139	0.000330733	PF13855:Leucine rich repeat	-
BnaCnng39490D	5.14158	0.00302178	4.40191	0.0112395	6.50325	0.000135996	Q9SKB2.1 RecName: Full=Leucine-rich repeat receptor-like serine/threonine/tyrosine-protein kinase SOBIR1; AltName: Full=Protein EVERSHED; AltName: Full=Protein SUPPRESSOR OF BIR1-1; Flags: Precursor && PF13855:Leucine rich repeat|PF00069:Protein kinase domain	Pkinase
BnaC04g35710D	9.67417	6.68352e-27	10.7292	1.65028e-13	8.11798	8.18369e-05	PF13855:Leucine rich repeat	-
BnaA02g06920D	-8.78622	1.2279e-10	-7.39884	1.46489e-09	-8.22274	5.25429e-09	PF12819:Carbohydrate-binding protein of the ER|PF07714:Protein tyrosine kinase	Pkinase_Tyr
BnaC01g02430D	-3.71872	1.55386e-61	-3.89796	7.40875e-07	-3.96791	1.21927e-23	PF07714:Protein tyrosine kinase|PF13855:Leucine rich repeat|PF08263:Leucine rich repeat N-terminal domain	Pkinase_Tyr
BnaA06g02060D	-2.76239	2.12647e-22	-3.29953	6.037e-18	-2.24845	0.00276954	PF12819:Carbohydrate-binding protein of the ER|PF07714:Protein tyrosine kinase	Pkinase_Tyr
BnaC05g33820D	-1.3066	6.57224e-06	-1.89371	5.38587e-08	-1.80535	2.45305e-05	PF00069:Protein kinase domain	Pkinase
BnaC03g57050D	3.0155	1.4341e-19	2.5528	5.53415e-07	2.06442	4.16998e-05	PF08263:Leucine rich repeat N-terminal domain|PF00069:Protein kinase domain|PF13855:Leucine rich repeat	Pkinase
BnaC01g38950D	2.92864	6.33095e-11	3.31986	2.1767e-19	3.92077	5.13273e-21	Q9LFP7.1 RecName: Full=Probable receptor-like protein kinase At5g15080 && PF00069:Protein kinase domain	Pkinase
BnaA02g06930D	7.26023	2.93564e-07	3.55131	2.80941e-05	4.14498	0.00341129	PF12819:Carbohydrate-binding protein of the ER|PF00069:Protein kinase domain	Pkinase
BnaC09g50960D	8.68359	1.35753e-10	9.17449	7.50879e-11	7.6141	3.00171e-09	C0LGX3.1 RecName: Full=LRR receptor-like serine/threonine-protein kinase HSL2; AltName: Full=Protein HAESA-LIKE2; Flags: Precursor && PF08263:Leucine rich repeat N-terminal domain|PF00069:Protein kinase domain|PF13855:Leucine rich repeat	Pkinase
BnaC07g45520D	7.66421	0.000691954	12.113	1.78288e-20	8.59322	2.82251e-39	PF13499:EF-hand domain pair|PF00069:Protein kinase domain	Pkinase

## Sheet: (B) Calcium
Table S6. Differentially expressed genes (DEGs) related to calcium singaling. In this case, comparisons were made between inoculated clubroot resistant (CR) and inoculated clubroot susceptible (CS) genotypes. Res1 = Resistant genotype at 1 day post inoculation, Res4 = Resistant genotype at 4 day post inoculation, and Res7 = Resistant genotype at 7 day post inoculation. Sus1 = Susceptible genotype…
gene_id	Res1_TvsSus1_T_log2FoldChange	Res1_TvsSus1_T_padj	Res4_TvsSus4_T_log2FoldChange	Res4_TvsSus4_T_padj	Res7_TvsSus7_T_log2FoldChange	Res7_TvsSus7_T_padj	gene_description
BnaC01g08580D	-10.8925	1.45828e-17	-10.2241	2.43365e-14	-10.4153	1.32494e-14	Q9SZR1.2 RecName: Full=Calcium-transporting ATPase 10, plasma membrane-type; AltName: Full=Ca(2+)-ATPase isoform 10 && PF12515:Ca2+-ATPase N terminal autoinhibitory domain|PF00689:Cation transporting ATPase, C-terminus|PF00702:haloacid dehalogenase-like hydrolase|PF00690:Cation transporter/ATPase, N-terminus|PF00122:E1-E2 ATPase
BnaA09g21200D	-6.71692	2.43905e-06	-6.11947	3.34961e-06	-8.53644	3.04961e-09	PF07725:Leucine Rich Repeat|PF07887:Calmodulin binding protein-like|PF00931:NB-ARC domain
BnaC01g05240D	-7.77142	3.13935e-08	-8.16588	6.79235e-09	-7.65152	8.0041e-07	Q7FRS8.1 RecName: Full=Calcineurin B-like protein 10; AltName: Full=SOS3-like calcium binding protein 8; Short=SCaBP8 && PF13499:EF-hand domain pair
BnaCnng62950D	-5.51841	1.44543e-09	-4.49037	4.49909e-06	-3.94415	1.288e-06	Q8CGZ0.1 RecName: Full=Calcium homeostasis endoplasmic reticulum protein; AltName: Full=SR-related CTD-associated factor 6 && PF04818:RNA polymerase II-binding domain.|PF01805:Surp module
BnaA07g21880D	-3.77687	2.92611e-34	-2.71123	1.40419e-05	-3.86312	3.98988e-16	PF04678:Mitochondrial calcium uniporter
BnaCnng76780D	-2.87658	3.02209e-08	-3.42904	1.12515e-05	-3.66883	1.28903e-06	PF13833:EF-hand domain pair
BnaA09g07780D	-2.96658	0.0403656	-2.80977	0.0238029	-3.58774	0.0124623	PF04678:Mitochondrial calcium uniporter
BnaC01g06390D	-3.44848	3.76163e-56	-3.12028	5.36711e-13	-3.46979	1.04548e-15	PF13499:EF-hand domain pair|PF13833:EF-hand domain pair
BnaA04g25000D	-3.8595	1.86234e-27	-4.1175	1.93078e-10	-3.46486	3.96407e-09	PF13499:EF-hand domain pair
BnaC03g24790D	-2.35225	2.94935e-17	-1.613	4.42085e-10	-2.13538	8.39779e-09	PF13499:EF-hand domain pair
BnaA08g22360D	1.41342	1.88275e-12	1.465	0.00192383	1.36779	0.000251227	PF13178:Protein of unknown function (DUF4005)|PF00612:IQ calmodulin-binding motif
BnaA02g09590D	1.10548	0.00257566	1.34236	0.0025304	1.5826	0.0325477	Q9LSQ6.1 RecName: Full=Calcium-binding protein PBP1; AltName: Full=KIC-related protein 2; AltName: Full=PINOID-binding protein 1 && PF13833:EF-hand domain pair
BnaA03g20740D	1.68485	4.43598e-08	2.63145	8.23152e-11	2.04496	8.18618e-08	PF13499:EF-hand domain pair
BnaAnng32190D	2.43806	3.60963e-06	3.06191	1.0512e-06	3.29403	1.55266e-07	PF13499:EF-hand domain pair
BnaA08g15730D	6.68207	0.000127412	6.42454	1.81912e-18	6.75165	2.60552e-24	O81108.1 RecName: Full=Calcium-transporting ATPase 2, plasma membrane-type; AltName: Full=Ca(2+)-ATPase isoform 2 && PF12515:Ca2+-ATPase N terminal autoinhibitory domain|PF00690:Cation transporter/ATPase, N-terminus|PF00689:Cation transporting ATPase, C-terminus|PF00122:E1-E2 ATPase|PF12710:haloacid dehalogenase-like hydrolase
BnaA03g34540D	5.80377	1.41019e-08	6.6993	8.31406e-08	8.48868	1.86707e-09	PF13499:EF-hand domain pair|PF04607:Region found in RelA / SpoT proteins|PF13328:HD domain
BnaC07g45520D	7.66421	0.000691954	12.113	1.78288e-20	8.59322	2.82251e-39	PF13499:EF-hand domain pair|PF00069:Protein kinase domain
BnaA01g04850D	9.0853	1.40134e-20	10.386	8.58035e-39	9.34736	1.03661e-43	PF13833:EF-hand domain pair|PF13499:EF-hand domain pair

## Sheet: (C) ROS
Table S6. Differentially expressed genes (DEGs) related to reactive oxygen species (ROS). In this case, comparisons were made between inoculated clubroot resistant (CR) and inoculated clubroot susceptible (CS) genotypes. Res1 = Resistant genotype at 1 day post inoculation, Res4 = Resistant genotype at 4 day post inoculation, and Res7 = Resistant genotype at 7 day post inoculation. Sus1 = Suscepti…
gene_id	Res1_TvsSus1_T_log2FoldChange	Res1_TvsSus1_T_padj	Res4_TvsSus4_T_log2FoldChange	Res4_TvsSus4_T_padj	Res7_TvsSus7_T_log2FoldChange	Res7_TvsSus7_T_padj	gene_description	tf_family
BnaC01g01960D	-8.0178	7.93155e-09	-8.31472	5.27056e-09	-7.95699	2.22429e-08	PF00085:Thioredoxin	-
BnaC01g07240D	-6.34281	0.000234337	-5.72907	0.0131412	-7.25404	2.99863e-05	Q8VZQ0.1 Probable nucleoredoxin 3; Short=AtNrx3 && PF07649:C1-like domain|PF13905:Thioredoxin-like	C1_3
BnaA09g10960D	-4.14339	0.00290693	-7.05196	4.97736e-06	-6.52122	0.000100901	Q8LBU2.1 Probable glutathione peroxidase 8 && PF00255:Glutathione peroxidase	GSHPx
BnaC05g43860D	-5.52934	6.34007e-26	-4.91732	1.62637e-11	-6.39182	7.99714e-18	PF00085:Thioredoxin	-
BnaC02g03510D	-6.53141	8.55649e-11	-4.72698	1.77602e-08	-5.69756	2.83682e-06	PF13417:Glutathione S-transferase, N-terminal domain|PF13410:Glutathione S-transferase, C-terminal domain	-
BnaA06g21920D	-4.43981	7.06322e-25	-3.91384	3.3823e-07	-4.89383	1.02401e-10	PF13417:Glutathione S-transferase, N-terminal domain	-
BnaC03g51650D	-4.16288	1.66131e-35	-3.26823	6.42831e-05	-4.36852	1.248e-12	PF13417:Glutathione S-transferase, N-terminal domain	-
BnaA10g17770D	-4.00929	1.11849e-18	-3.803	1.94869e-11	-4.17124	5.90332e-13	PF13410:Glutathione S-transferase, C-terminal domain|PF13417:Glutathione S-transferase, N-terminal domain	-
BnaC03g36400D	-2.4768	5.83635e-07	-2.6426	2.90837e-08	-2.86534	3.44311e-06	Q9C9Y6.1 Thioredoxin H9; Short=AtTrxh9; AltName: Full=Thioredoxin 9; Short=AtTRX9 && PF00085:Thioredoxin	-
BnaA04g06510D	-3.40489	5.01944e-06	-3.81257	0.000119227	-2.74046	0.000283106	PF00255:Glutathione peroxidase	GSHPx
BnaA06g34160D	-1.96221	5.80272e-13	-1.87817	3.75867e-08	-1.88208	2.3317e-12	Q9ZVQ3.1 Glutathione S-transferase Z1; Short=AtGSTZ1; AltName: Full=GST class-zeta member 1; AltName: Full=Glutathione S-transferase 18; AltName: Full=Maleylacetone isomerase; Short=MAI && PF13417:Glutathione S-transferase, N-terminal domain	-
BnaA06g14310D	-1.84443	1.68083e-07	-2.05005	2.34042e-06	-1.55768	0.000739441	PF13462:Thioredoxin	-
BnaA09g07960D	-1.67811	2.0726e-08	-1.53601	1.96893e-05	-1.26493	0.00023375	PF00462:Glutaredoxin	-
BnaC06g20430D	-1.40048	6.38118e-11	-1.30871	0.0381439	-1.22047	0.0045659	PF13417:Glutathione S-transferase, N-terminal domain|PF13410:Glutathione S-transferase, C-terminal domain	-
BnaA06g37040D	1.07553	1.93746e-05	1.02327	0.000469925	1.06284	0.00755607	Q9FMN4.1 Thioredoxin-like protein Clot; AltName: Full=Thioredoxin Clot; Short=AtClot && PF06110:Eukaryotic protein of unknown function (DUF953)	-
BnaA03g25620D	1.09101	6.69467e-06	1.43633	0.00426047	1.26762	0.000525191	PF00462:Glutaredoxin|PF00085:Thioredoxin	-
BnaA08g01210D	1.31517	3.53751e-06	1.09696	3.66412e-05	1.29548	0.000267284	PF00085:Thioredoxin|PF13414:TPR repeat	-
BnaA07g19550D	1.57104	8.86534e-05	1.77346	0.00176136	1.73201	0.000934065	PF00255:Glutathione peroxidase	GSHPx
BnaA10g29790D	1.98555	3.78066e-12	1.58398	0.00831209	1.96747	0.00017999	PF00462:Glutaredoxin	-
BnaA01g00930D	2.09919	2.66447e-13	2.3589	3.48668e-11	2.02722	1.0041e-06	O23166.2 Thioredoxin-like protein HCF164, chloroplastic; AltName: Full=Protein HIGH CHLOROPHYLL FLUORESCENCE 164; Flags: Precursor && PF00085:Thioredoxin	-
BnaA04g12860D	2.58198	2.61407e-13	2.57642	7.46762e-11	2.34739	0.000123621	Q9SJZ2.1 Peroxidase 17; Short=Atperox P17; AltName: Full=ATP25a; Flags: Precursor && PF00141:Peroxidase	-
BnaA03g17670D	2.38683	4.9636e-10	2.41421	1.32315e-05	2.6363	1.43316e-08	PF00462:Glutaredoxin	-
BnaAnng12480D	2.4652	6.69515e-16	2.58401	2.23431e-09	2.79386	5.79798e-10	Q9MAU6.2 Protein disulfide-isomerase like 2-2; Short=AtPDIL2-2; AltName: Full=Protein disulfide-isomerase 10; Short=PDI10; AltName: Full=Protein disulfide-isomerase like 5-1; Short=AtPDIL5-1; Flags: Precursor && PF00085:Thioredoxin	-
BnaC03g24130D	2.79698	2.66818e-05	3.11886	7.43693e-09	2.93852	0.000394417	PF00255:Glutathione peroxidase	GSHPx
BnaC08g20820D	3.24279	1.8723e-07	3.86767	8.86748e-12	3.2898	4.09677e-05	Q9SMU8.1 Peroxidase 34; Short=Atperox P34; AltName: Full=ATPCb; Flags: Precursor && PF00141:Peroxidase	-
BnaAnng19520D	5.69804	2.92061e-10	4.98	5.08309e-06	3.92634	3.42784e-08	PF00085:Thioredoxin	-
BnaC09g09820D	7.03877	6.39585e-07	3.32984	0.00143352	3.93911	1.22222e-06	PF14497:Glutathione S-transferase, C-terminal domain	-
BnaC08g27300D	4.6798	0.00272839	7.55162	3.48212e-05	8.00722	1.60112e-05	PF02777:Iron/manganese superoxide dismutases, C-terminal domain|PF00081:Iron/manganese superoxide dismutases, alpha-hairpin domain	-

## Sheet: (D) Lignin
Table S6. Differentially expressed genes (DEGs) related to lignin. In this case, comparisons were made between inoculated clubroot resistant (CR) and inoculated clubroot susceptible (CS) genotypes. Res1 = Resistant genotype at 1 day post inoculation, Res4 = Resistant genotype at 4 day post inoculation, and Res7 = Resistant genotype at 7 day post inoculation. Sus1 = Susceptible genotype at 1 day p…
gene_id	Res1_TvsSus1_T_log2FoldChange	Res1_TvsSus1_T_padj	Res4_TvsSus4_T_log2FoldChange	Res4_TvsSus4_T_padj	Res7_TvsSus7_T_log2FoldChange	Res7_TvsSus7_T_padj	gene_description
BnaC01g04790D	-12.5636	1.64898e-23	-9.35014	1.62572e-25	-12.5527	3.01293e-22	PF00141:Peroxidase
BnaC01g02300D	-11.9688	4.05132e-21	-6.92876	0.0357457	-11.61	2.68564e-18	PF00141:Peroxidase
BnaC01g01400D	-11.6004	4.54204e-19	-8.69712	2.89156e-24	-10.732	1.59869e-15	PF00141:Peroxidase
BnaCnng52220D	-10.1949	2.61408e-15	-8.8683	2.26092e-10	-9.60668	2.64929e-12	PF00141:Peroxidase
BnaC01g01060D	-8.22404	5.88328e-09	-8.06557	1.97268e-05	-7.99065	3.16313e-07	O65621.1 Probable cinnamyl alcohol dehydrogenase 6; Short=AtCAD6; AltName: Full=Cinnamyl alcohol dehydrogenase-like protein A && PF00107:Zinc-binding dehydrogenase|PF08240:Alcohol dehydrogenase GroES-like domain
BnaC01g02640D	-4.29858	1.74854e-25	-4.31871	2.71707e-18	-4.23618	2.0098e-22	PF00141:Peroxidase
BnaC02g15500D	-2.76996	5.42106e-17	-3.58044	5.45065e-11	-3.00961	1.0509e-08	PF00141:Peroxidase
BnaA04g09990D	-2.61131	1.38096e-13	-2.2461	0.00798925	-2.55538	7.90187e-05	PF00141:Peroxidase
BnaA08g28210D	-2.18185	0.00250866	-2.30737	0.0035189	-2.42686	0.000247233	PF00141:Peroxidase
BnaA01g01280D	1.34791	7.83907e-06	1.34352	0.0216003	1.43615	8.01535e-08	PF00141:Peroxidase
BnaA01g01600D	1.29208	8.87452e-07	1.81092	3.37741e-05	1.82584	0.000107246	PF00141:Peroxidase
BnaA05g00770D	1.69432	6.397e-08	2.40709	0.0004441	2.03587	0.00390897	PF02773:S-adenosylmethionine synthetase, C-terminal domain|PF00438:S-adenosylmethionine synthetase, N-terminal domain|PF02772:S-adenosylmethionine synthetase, central domain
BnaC04g00410D	1.6129	5.92652e-09	1.63851	0.0419759	2.0717	0.00218913	PF02772:S-adenosylmethionine synthetase, central domain|PF02773:S-adenosylmethionine synthetase, C-terminal domain|PF00438:S-adenosylmethionine synthetase, N-terminal domain
BnaA04g25090D	5.3791	1.19157e-12	6.71643	5.26801e-08	5.50804	6.44602e-08	PF00141:Peroxidase
BnaAnng36480D	6.73748	7.85328e-19	8.60548	5.80885e-10	7.3743	1.46265e-08	PF00141:Peroxidase

## Sheet: (E) R Gene
Table S6. Differentially expressed genes (DEGs) related to resistant genes. In this case, comparisons were made between inoculated clubroot resistant (CR) and inoculated clubroot susceptible (CS) genotypes. Res1 = Resistant genotype at 1 day post inoculation, Res4 = Resistant genotype at 4 day post inoculation, and Res7 = Resistant genotype at 7 day post inoculation. Sus1 = Susceptible genotype a…
gene_id	Res1_TvsSus1_T_log2FoldChange	Res1_TvsSus1_T_padj	Res4_TvsSus4_T_log2FoldChange	Res4_TvsSus4_T_padj	Res7_TvsSus7_T_log2FoldChange	Res7_TvsSus7_T_padj	gene_description	tf_family
BnaA09g17530D	-11.354	4.74684e-19	-8.04379	1.90687e-17	-11.0526	1.102e-15	O48573.1 Disease resistance protein LAZ5; AltName: Full=Protein LAZARUS 5; AltName: Full=Protein TOLERANCE TO TOBACCO RINGSPOT VIRUS 1 && PF01582:TIR domain|PF00931:NB-ARC domain|PF13855:Leucine rich repeat	TIR
BnaC06g04820D	-8.66101	6.44422e-11	-9.84999	5.72148e-12	-10.0242	3.64444e-14	F4J339.1 Probable disease resistance protein RPP1; AltName: Full=Protein RECOGNITION OF PERONOSPORA PARASITICA 1 && PF01582:TIR domain|PF00931:NB-ARC domain	TIR
BnaC03g62030D	-9.56607	2.03687e-13	-9.2702	6.46996e-11	-9.74604	5.16619e-13	Q9SCX7.1 Inactive disease resistance protein RPS4; AltName: Full=Resistance to Pseudomonas syringae 4 && PF00931:NB-ARC domain|PF13855:Leucine rich repeat|PF01582:TIR domain	TIR
BnaC05g47400D	-9.75278	9.71998e-14	-7.36244	4.23443e-13	-9.7094	8.23876e-13	Q9M5J9.1 Polygalacturonase inhibitor 1; AltName: Full=Polygalacturonase-inhibiting protein 1; Short=PGIP-1; Flags: Precursor && PF08263:Leucine rich repeat N-terminal domain	LRRNT_2
BnaC05g47420D	-9.63587	1.32291e-13	-7.44145	1.68486e-13	-9.59131	1.84068e-12	PF00931:NB-ARC domain|PF01582:TIR domain	TIR
BnaC03g62010D	-8.34585	1.37158e-09	-8.77855	1.22249e-09	-9.04806	4.12473e-10	PF08263:Leucine rich repeat N-terminal domain|PF00069:Protein kinase domain	Pkinase
BnaA08g09210D	-5.73688	3.80013e-13	-5.11973	2.75831e-10	-8.84616	3.82057e-10	PF00931:NB-ARC domain|PF01582:TIR domain	TIR
BnaC01g04780D	-8.71446	1.03286e-47	-7.92087	2.88229e-17	-8.55402	4.71025e-36	PF01582:TIR domain|PF00931:NB-ARC domain	TIR
BnaC01g04860D	-8.36751	1.7311e-26	-8.86009	5.23162e-11	-8.5492	3.22038e-15	PF05659:Arabidopsis broad-spectrum mildew resistance protein RPW8|PF00931:NB-ARC domain	NB-ARC
BnaC03g62020D	-8.54342	2.60805e-10	-5.56352	4.53878e-06	-8.46409	4.53912e-09	P0DKH6.1 Disease resistance protein RPS6; AltName: Full=Resistance to Pseudomonas syringae 6 && PF07725:Leucine Rich Repeat|PF00931:NB-ARC domain|PF01582:TIR domain	TIR
BnaC01g40650D	-8.43699	3.63005e-10	-8.44018	2.31698e-09	-8.149	1.5911e-08	PF07725:Leucine Rich Repeat|PF01582:TIR domain|PF00931:NB-ARC domain	TIR
BnaC07g35930D	-7.82512	7.20131e-09	-8.93855	3.95353e-09	-7.96072	4.91625e-08	PF01582:TIR domain|PF00931:NB-ARC domain|PF07725:Leucine Rich Repeat|PF12799:Leucine Rich repeats (2 copies)	NB-ARC
BnaC07g35920D	-6.90601	4.04861e-06	-7.72613	1.23342e-06	-7.2452	2.24503e-06	PF07725:Leucine Rich Repeat	LRR_3
BnaA09g21070D	-6.86348	5.79905e-06	-7.14303	4.54148e-06	-7.06456	5.53986e-06	PF01582:TIR domain	TIR
BnaA03g25330D	-6.90356	6.83e-06	-7.40304	1.74593e-06	-6.77834	9.16291e-05	F4I594.1 Disease resistance protein RML1A; AltName: Full=Protein RESISTANCE TO LEPTOSPHAERIA MACULANS 1A && PF01582:TIR domain|PF00931:NB-ARC domain	TIR
BnaA06g21400D	-5.85499	0.000908539	-6.23982	0.000209279	-6.62968	4.017e-05	PF01582:TIR domain|PF00931:NB-ARC domain	TIR
BnaC05g45830D	-7.61668	9.31045e-16	-6.98597	6.58328e-15	-6.26206	1.86876e-16	PF01582:TIR domain|PF00931:NB-ARC domain|PF07725:Leucine Rich Repeat	TIR
BnaCnng06050D	-7.5584	1.20237e-38	-5.47731	3.49115e-25	-6.20483	6.64664e-36	PF01582:TIR domain|PF00931:NB-ARC domain|PF07725:Leucine Rich Repeat	NB-ARC
BnaC01g40270D	-5.00764	4.24166e-14	-6.01638	9.78301e-08	-5.37132	2.6738e-12	Q9SZA7.3 Probable disease resistance protein At4g33300 && PF05659:Arabidopsis broad-spectrum mildew resistance protein RPW8|PF00931:NB-ARC domain	NB-ARC
BnaA08g09220D	-6.59609	8.51932e-30	-5.50263	6.03133e-18	-5.01823	8.77607e-10	PF08263:Leucine rich repeat N-terminal domain	LRRNT_2
BnaA10g30070D	-3.95831	4.59249e-14	-4.10181	0.000250112	-3.87695	1.9723e-06	PF01582:TIR domain|PF00931:NB-ARC domain	TIR
BnaC08g20210D	-7.35301	5.44421e-07	-3.2711	0.00560861	-3.7752	0.000372552	O82500.1 Putative disease resistance protein At4g11170 && PF00931:NB-ARC domain|PF01582:TIR domain	TIR
BnaA04g11180D	-3.32487	4.26453e-06	-3.12243	2.00149e-06	-3.00036	1.68027e-08	PF08263:Leucine rich repeat N-terminal domain|PF00069:Protein kinase domain|PF13855:Leucine rich repeat	Pkinase
BnaC02g46990D	-2.17437	1.02987e-08	-1.90002	8.28029e-05	-2.55486	9.80169e-07	Q9FKZ1.1 Probable disease resistance protein At5g66900 && PF05659:Arabidopsis broad-spectrum mildew resistance protein RPW8|PF00931:NB-ARC domain	NB-ARC
BnaC02g32310D	-2.77778	4.07302e-13	-2.42409	0.000646791	-2.29051	5.09331e-07	PF08263:Leucine rich repeat N-terminal domain|PF12819:Carbohydrate-binding protein of the ER	LRRNT_2
BnaC03g50640D	-2.19668	0.000113832	-2.36689	0.0351944	-1.98983	0.0480477	Q9M8T0.1 Probable inactive receptor kinase At3g02880; Flags: Precursor && PF13855:Leucine rich repeat|PF00069:Protein kinase domain|PF08263:Leucine rich repeat N-terminal domain	Pkinase
BnaC03g57050D	3.0155	1.4341e-19	2.5528	5.53415e-07	2.06442	4.16998e-05	PF01582:TIR domain|PF00931:NB-ARC domain	TIR
BnaA07g38520D	1.22122	0.00309697	1.85546	6.05587e-05	2.12153	1.88183e-05	PF13855:Leucine rich repeat|PF08263:Leucine rich repeat N-terminal domain	LRRNT_2
BnaA04g15490D	2.5165	2.43695e-15	2.70512	8.29953e-06	2.35402	2.22648e-10	PF00069:Protein kinase domain|PF08263:Leucine rich repeat N-terminal domain|PF13855:Leucine rich repeat	Pkinase
BnaA08g10100D	3.03201	2.4904e-21	2.91485	8.70264e-14	2.71202	1.59271e-09	Q40392.1 TMV resistance protein N && PF01582:TIR domain|PF00931:NB-ARC domain	TIR
BnaC09g07690D	3.02418	3.22608e-17	3.20427	4.63708e-09	2.86593	1.92381e-10	PF00931:NB-ARC domain|PF01582:TIR domain|PF07725:Leucine Rich Repeat	TIR
BnaC07g21070D	2.72695	9.03345e-14	3.55431	5.09383e-06	2.86707	3.20751e-19	PF00069:Protein kinase domain|PF08263:Leucine rich repeat N-terminal domain|PF13855:Leucine rich repeat	Pkinase
BnaA09g11730D	3.33864	0.000445487	2.67153	1.9867e-05	3.26909	0.00127715	PF00931:NB-ARC domain|PF01582:TIR domain	TIR
BnaAnng21180D	3.30496	1.28675e-28	4.08593	4.03376e-32	3.61404	1.67379e-29	Q9FHI7.1 Probable disease resistance protein At5g45490 && PF00931:NB-ARC domain	NB-ARC
BnaA05g33240D	4.9928	4.03349e-57	4.42894	1.06594e-22	3.86696	1.05862e-14	PF00069:Protein kinase domain|PF13855:Leucine rich repeat|PF08263:Leucine rich repeat N-terminal domain	Pkinase
BnaA06g29890D	7.72939	1.19493e-07	7.60306	2.47204e-07	6.45023	2.44877e-05	PF00069:Protein kinase domain|PF13855:Leucine rich repeat|PF08263:Leucine rich repeat N-terminal domain	Pkinase
BnaA08g16300D	6.17206	5.874e-05	7.59513	2.55182e-07	6.4804	7.57682e-05	Q40392.1 TMV resistance protein N && PF01582:TIR domain|PF00931:NB-ARC domain	TIR
BnaC01g39050D	6.86227	1.47104e-06	5.18167	1.18593e-05	6.72705	6.73151e-07	PF01582:TIR domain	TIR
BnaA02g35050D	7.83157	3.59375e-17	7.38643	1.2374e-17	6.77515	3.26484e-23	PF13855:Leucine rich repeat|PF00069:Protein kinase domain	Pkinase
BnaC06g34080D	6.13702	0.000263173	6.77416	0.000116841	7.47361	1.79033e-05	PF08263:Leucine rich repeat N-terminal domain	LRRNT_2
BnaC09g07470D	8.27304	1.03886e-09	7.05089	1.4792e-06	7.57121	1.47789e-07	PF01582:TIR domain|PF07725:Leucine Rich Repeat|PF00931:NB-ARC domain	TIR
BnaC09g07660D	6.4582	0.00162434	10.5028	3.2629e-15	8.11596	3.30009e-20	PF00931:NB-ARC domain	NB-ARC
BnaC06g34070D	7.99948	6.5388e-09	8.82463	8.49997e-10	8.48119	9.69443e-10	Q9FI14.1 Disease resistance protein TAO1; AltName: Full=Protein TARGET OF AVRB OPERATION 1 && PF07725:Leucine Rich Repeat|PF00931:NB-ARC domain|PF01582:TIR domain	TIR
BnaCnng23020D	10.4862	3.01929e-16	9.73857	2.18846e-14	11.4721	3.96235e-15	PF00931:NB-ARC domain|PF13855:Leucine rich repeat	NB-ARC
