# Supplementary material for: Early-stage responses to Plasmodiophora brassicae at the transcriptome and metabolome levels in clubroot resistant and susceptible oilseed Brassica napus
Source: Royal Society of Chemistry journal article supplement (doi:10.1039/d2mo00251e), 2022-11-10
Supplement: d2mo00251e16.xlsx [file d2mo00251e16.xlsx]

## Sheet: glucosinolate
Table S7. Differentially expressed genes (DEGs) related to glucosinolate. In this case, comparisons were made between inoculated clubroot resistant (CR) and inoculated clubroot susceptible (CS) genotypes. Res1 = Resistant genotype at 1 day post inoculation, Res4 = Resistant genotype at 4 day post inoculation, and Res7 = Resistant genotype at 7 day post inoculation. Sus1 = Susceptible genotype at …
gene_id	Res1_TvsSus1_T_log2FoldChange	Res1_TvsSus1_T_padj	Res4_TvsSus4_T_log2FoldChange	Res4_TvsSus4_T_padj	Res7_TvsSus7_T_log2FoldChange	Res7_TvsSus7_T_padj	gene_description
BnaA06g08330D	-6.3743	1.32936e-05	-3.85285	0.000168516	-2.46824	0.00483879	Q9FWW9.1 Flavin-monooxygenase glucosinolate S-oxygenase-like 2
BnaC04g54890D	-1.7474	0.00456271	-2.2513	0.0346205	-2.15332	0.0298319	PF00685:Sulfotransferase domain
BnaC06g35000D	1.72727	9.97694e-13	1.93989	2.89963e-05	2.132	0.00061138	PF00685:Sulfotransferase domain
BnaC02g35150D	2.32264	2.82662e-11	2.55392	0.00530158	2.15258	0.0179505	PF00685:Sulfotransferase domain
BnaA07g22400D	5.04022	9.61737e-41	6.07928	3.86134e-18	3.91677	7.62215e-08	Q9C9C9.1 Desulfo-glucosinolate sulfotransferase B
BnaC02g35140D	7.27304	0.00140089	11.4621	1.56171e-17	7.56744	0.00502599	PF00685:Sulfotransferase domain
BnaA06g14950D	6.42589	1.41635e-07	8.21251	5.39545e-09	8.19395	1.03663e-06	Q9LPU8.1 Indole glucosinolate O-methyltransferase 4
