# Supplementary material for: Early-stage responses to Plasmodiophora brassicae at the transcriptome and metabolome levels in clubroot resistant and susceptible oilseed Brassica napus
Source: Royal Society of Chemistry journal article supplement (doi:10.1039/d2mo00251e), 2022-11-10
Supplement: d2mo00251e17.xlsx [file d2mo00251e17.xlsx]

## Sheet: Chromnosome A3
Table S8. Differentially expressed genes (DEGs) identified in chromosome A3
gene_id	Res1_TvsSus1_T_log2FoldChange	Res1_TvsSus1_T_padj	Res4_TvsSus4_T_log2FoldChange	Res4_TvsSus4_T_padj	Res7_TvsSus7_T_log2FoldChange	Res7_TvsSus7_T_padj	gene_description
BnaA03g34650D	-9.51348	6.55299e-13	-9.44062	2.04635e-11	-9.77448	2.37918e-13	Q9LUN2.1 Probable metal-nicotianamine transporter YSL5; AltName: Full=Protein YELLOW STRIPE LIKE 5; Short=AtYSL5 && PF03169:OPT oligopeptide transporter protein
BnaA03g27290D	-8.03435	2.58582e-12	-7.18387	2.73643e-12	-9.64105	5.18386e-12	PF00572:Ribosomal protein L13
BnaA03g26330D	-7.21553	1.22148e-05	-7.71982	0.00651074	-9.47211	0.000628928	PF00704:Glycosyl hydrolases family 18
BnaA03g26180D	-9.43544	7.75151e-13	-6.00938	0.000140896	-9.3723	2.1542e-10	O81291.1 L-type lectin-domain containing receptor kinase IV.4; Short=LecRK-IV.4; Flags: Precursor && PF00069:Protein kinase domain|PF00139:Legume lectin domain
BnaA03g34720D	-7.79597	3.06059e-08	-7.67057	9.84471e-08	-8.4091	4.72745e-09	PF07734:F-box associated
BnaA03g55270D	-8.76993	1.34759e-10	-8.70296	5.50601e-09	-8.39797	8.23075e-09	PF10890:Protein of unknown function (DUF2741)
BnaA03g02020D	-7.57576	3.41888e-07	-6.31437	0.00547815	-7.99858	2.15059e-05	O81209.2 Respiratory burst oxidase homolog protein A; AltName: Full=NADPH oxidase RBOHA; Short=AtRBOHA && PF08414:Respiratory burst NADPH oxidase|PF08030:Ferric reductase NAD binding domain|PF01794:Ferric reductase like transmembrane component|PF08022:FAD-binding domain
BnaA03g27280D	-8.92638	1.96513e-11	-8.80862	8.28715e-10	-7.95332	9.45019e-09	PF01765:Ribosome recycling factor
BnaA03g31030D	-6.93547	1.08503e-05	-6.91906	1.0511e-05	-7.90199	2.01897e-06	PF00202:Aminotransferase class-III
BnaA03g18910D	-8.26449	7.15687e-19	-8.19109	3.76547e-25	-7.74264	1.14779e-19	Q9XEE6.1 Zinc finger CCCH domain-containing protein 29; Short=AtC3H29; AltName: Full=AtSZF2 && -
BnaA03g03070D	-6.07333	9.71108e-07	-5.07863	5.16536e-07	-7.62618	1.86922e-07	PF01981:Peptidyl-tRNA hydrolase PTH2
BnaA03g32190D	-7.85344	7.79257e-08	-7.71713	1.12207e-07	-7.35498	1.04942e-06	PF08241:Methyltransferase domain
BnaA03g32720D	-7.32497	5.8183e-07	-7.47497	2.62244e-06	-7.2503	3.81295e-06	PF04889:Cwf15/Cwc15 cell cycle control protein
BnaA03g34140D	-6.43466	0.000294932	-6.11689	0.000905311	-7.12698	0.000208012	PF00249:Myb-like DNA-binding domain
BnaA03g19190D	-4.43143	0.0331463	-3.61668	0.0374137	-7.00492	3.06152e-05	Q93WU8.2 Probable WRKY transcription factor 54; AltName: Full=WRKY DNA-binding protein 54 && PF03106:WRKY DNA -binding domain
BnaA03g34730D	-7.11345	1.61565e-06	-7.36132	1.45939e-06	-6.91868	1.43952e-05	PF00646:F-box domain
BnaA03g07010D	-6.811	8.01837e-06	-6.55295	6.48428e-05	-6.79391	3.54195e-05	PF01150:GDA1/CD39 (nucleoside phosphatase) family
BnaA03g25330D	-6.90356	6.83e-06	-7.40304	1.74593e-06	-6.77834	9.16291e-05	PF00931:NB-ARC domain|PF01582:TIR domain|PF07725:Leucine Rich Repeat
BnaA03g17620D	-4.06318	0.000919123	-5.1971	0.00754923	-6.7183	0.000141771	O80443.1 GDSL esterase/lipase At2g38180; AltName: Full=Extracellular lipase At2g38180; Flags: Precursor && PF00657:GDSL-like Lipase/Acylhydrolase
BnaA03g55620D	-7.24985	1.8519e-07	-7.19375	1.99808e-06	-6.59222	2.1592e-07	PF10273:Pre-rRNA-processing protein TSR2
BnaA03g18900D	-6.43259	6.44926e-07	-7.06494	3.32699e-12	-6.55419	1.19357e-11	Q9XEE6.1 Zinc finger CCCH domain-containing protein 29; Short=AtC3H29; AltName: Full=AtSZF2 && PF00642:Zinc finger C-x8-C-x5-C-x3-H type (and similar)
BnaA03g00060D	-4.85695	0.0346654	-5.43716	0.00828352	-6.54105	0.00195554	PF13456:Reverse transcriptase-like
BnaA03g40950D	-6.66844	4.69032e-05	-6.35196	0.000139299	-6.48093	0.000149343	PF08646:Replication factor-A C terminal domain
BnaA03g07060D	-7.88338	1.09563e-16	-7.90854	3.29182e-15	-6.41135	1.00678e-16	Q42340.1 40S ribosomal protein S16-3 && PF00380:Ribosomal protein S9/S16
BnaA03g32320D	-5.67313	7.31266e-12	-5.58503	9.01894e-13	-5.97606	4.28283e-52	PF00012:Hsp70 protein|PF10712:NAD-specific glutamate dehydrogenase
BnaA03g32580D	-3.19076	0.00322086	-4.54351	0.00032728	-5.96408	0.000178755	PF05699:hAT family C-terminal dimerisation region|PF04937:Protein of unknown function (DUF 659)
BnaA03g21450D	-7.67615	1.62811e-08	-4.48204	5.30585e-08	-5.68323	3.71436e-07	Q9ZPY9.1 Phosphatidylinositol 4-kinase gamma 4; Short=AtPI4Kgamma4; Short=PI-4Kgamma4; Short=PI4K gamma 4; AltName: Full=Ubiquitin-like domain kinase gamma 4; Short=UbDK gamma 4 && -
BnaA03g37440D	-6.55586	3.08287e-05	-5.07494	0.00132794	-5.40358	0.0025227	Q6Q1P4.2 Structural maintenance of chromosomes protein 1; Short=SMC protein 1; Short=SMC-1; AltName: Full=Chromosome segregation protein SMC-1; AltName: Full=Cohesin complex subunit SMC-1; AltName: Full=Protein TITAN8 && PF02463:RecF/RecN/SMC N terminal domain|PF06470:SMC proteins Flexible Hinge Domain
BnaA03g29630D	-5.85402	0.00172024	-6.32388	0.00324304	-5.39049	0.00215969	PF13966:zinc-binding in reverse transcriptase|PF14111:Domain of unknown function (DUF4283)|PF14392:Zinc knuckle
BnaA03g12040D	-5.39344	0.00733926	-5.89975	0.00252509	-5.10249	0.036976	PF00201:UDP-glucoronosyl and UDP-glucosyl transferase
BnaA03g23970D	-5.43032	0.00121607	-4.25747	0.012784	-4.88137	0.000940928	PF00069:Protein kinase domain
BnaA03g06690D	-5.28762	4.42465e-40	-4.26109	0.000646791	-4.58336	5.71262e-08	PF00385:Chromo (CHRromatin Organisation MOdifier) domain
BnaA03g22000D	-2.18287	0.0352427	-3.43868	0.0055353	-4.56682	3.17316e-05	PF00106:short chain dehydrogenase
BnaA03g25280D	-3.86171	1.57256e-07	-4.13063	6.39694e-05	-4.55114	9.50324e-08	Q9ASW8.1 Protein WVD2-like 2 && PF06886:Targeting protein for Xklp2 (TPX2)
BnaA03g26110D	-4.29702	0.000138012	-4.45408	0.000827588	-4.3522	6.14631e-27	PF01257:Thioredoxin-like [2Fe-2S] ferredoxin
BnaA03g55880D	-3.0512	5.70909e-10	-3.86126	1.03966e-07	-3.9804	3.82679e-06	PF04755:PAP_fibrillin
BnaA03g21180D	-3.93243	3.13504e-09	-4.40046	1.87773e-13	-3.83134	2.50857e-11	PF03478:Protein of unknown function (DUF295)
BnaA03g26010D	-2.79803	0.000478237	-6.9647	5.10791e-06	-3.65931	0.0241917	PF01423:LSM domain
BnaA03g55780D	-3.00826	8.87229e-08	-2.68437	1.36498e-05	-3.57602	1.33915e-05	PF00249:Myb-like DNA-binding domain
BnaA03g34100D	-3.98471	6.16764e-25	-3.62171	4.08283e-23	-3.51893	1.8744e-14	PF10469:AKAP7 2'5' RNA ligase-like domain|PF00013:KH domain
BnaA03g56910D	-2.33212	2.90709e-05	-2.21145	0.00142695	-3.37089	1.30401e-06	Q8S8S1.1 Peroxisome biogenesis protein 16; AltName: Full=Peroxin-16; Short=AtPEX16; Short=AtPex16p; AltName: Full=Protein SHRUNKEN SEED 1 && PF08610:Peroxisomal membrane protein (Pex16)
BnaA03g34760D	-3.20462	2.97866e-11	-2.74481	0.000327402	-3.34724	7.65692e-08	Q9LVJ0.1 UV-B-induced protein At3g17800, chloroplastic; Flags: Precursor && PF05542:Protein of unknown function (DUF760)
BnaA03g21460D	-3.29768	1.58286e-20	-2.67286	2.25876e-07	-2.9977	3.21186e-09	PF00454:Phosphatidylinositol 3- and 4-kinase
BnaA03g00860D	-2.91897	1.53607e-07	-3.16449	4.39821e-07	-2.90903	2.77752e-06	PF00708:Acylphosphatase
BnaA03g03650D	-3.16203	2.13619e-07	-2.56261	5.11406e-06	-2.83158	1.58914e-06	PF12695:Alpha/beta hydrolase family
BnaA03g18020D	-2.28728	1.5129e-05	-2.77944	0.000682996	-2.80513	2.43354e-06	Q7ZWS2.2 7-methylguanosine phosphate-specific 5'-nucleotidase A; Short=7-methylguanosine nucleotidase A; AltName: Full=Cytosolic 5'-nucleotidase 3B-A; AltName: Full=Cytosolic 5'-nucleotidase III-like protein A; Short=cN-III-like protein A; AltName: Full=N(7)-methylguanylate 5'-phosphatase A && PF05822:Pyrimidine 5'-nucleotidase (UMPH-1)
BnaA03g03730D	-2.88937	1.10797e-14	-2.76928	7.60495e-09	-2.72297	1.56596e-05	PF04124:Dor1-like family
BnaA03g26440D	-2.27896	3.02985e-11	-3.03174	8.58712e-11	-2.7127	2.23692e-09	PF01106:NifU-like domain
BnaA03g56920D	-2.96132	3.27273e-09	-2.33383	7.67604e-06	-2.63609	0.00167166	PF09138:Urm1 (Ubiquitin related modifier)
BnaA03g28320D	-2.44573	8.51181e-19	-2.29091	1.55357e-06	-2.44972	3.29573e-09	Q9GCB9.1 Ribosomal protein S2, mitochondrial && PF00318:Ribosomal protein S2
BnaA03g23310D	-2.18683	1.20735e-07	-2.07595	0.00143212	-2.4388	3.44007e-08	Q93W20.1 NifU-like protein 2, chloroplastic; Short=AtCNfu2; Short=AtCnfU-V; Flags: Precursor && PF01106:NifU-like domain
BnaA03g22180D	-2.48355	2.81363e-19	-1.81523	0.000203825	-2.37372	2.88067e-11	PF02140:Galactose binding lectin domain|PF01301:Glycosyl hydrolases family 35
BnaA03g32210D	-2.62549	4.65032e-11	-2.8767	2.13249e-09	-2.32437	2.03113e-07	Q9LHH7.1 Bifunctional protein FolD 2; AltName: Full=Tetrahydrofolate dehydrogenase/cyclohydrolase 2; Includes: Methylenetetrahydrofolate dehydrogenase; Includes: Methenyltetrahydrofolate cyclohydrolase && PF02882:Tetrahydrofolate dehydrogenase/cyclohydrolase, NAD(P)-binding domain|PF00763:Tetrahydrofolate dehydrogenase/cyclohydrolase, catalytic domain
BnaA03g00900D	-2.35673	1.24873e-09	-2.61058	7.56469e-15	-2.32184	1.24086e-06	PF00581:Rhodanese-like domain
BnaA03g32670D	-2.12515	0.0221433	-3.88194	0.000115397	-2.306	0.0426212	PF00338:Ribosomal protein S10p/S20e
BnaA03g00990D	-2.1379	1.8046e-13	-2.25149	0.040085	-2.26351	3.79174e-16	PF07992:Pyridine nucleotide-disulphide oxidoreductase
BnaA03g55720D	-2.21011	0.00578109	-2.76099	0.000383658	-2.23974	0.00612546	PF02941:Ferredoxin thioredoxin reductase variable alpha chain
BnaA03g31110D	-2.17641	2.89667e-20	-2.21926	5.25012e-10	-2.22741	4.98787e-05	Q9C9Z1.2 Putative zinc transporter At3g08650 && PF02535:ZIP Zinc transporter
BnaA03g03080D	-2.80771	1.66158e-12	-2.74204	9.76573e-06	-2.11355	2.26858e-06	PF09496:Cenp-O kinetochore centromere component
BnaA03g00400D	-2.27824	4.61633e-09	-2.36929	1.297e-07	-2.0317	3.84146e-05	PF13839:GDSL/SGNH-like Acyl-Esterase family found in Pmr5 and Cas1p|PF14416:PMR5 N terminal Domain
BnaA03g33790D	-2.06439	7.12972e-25	-1.86785	5.7567e-13	-2.00099	7.22071e-08	O80340.1 Ethylene-responsive transcription factor 4; Short=AtERF4; AltName: Full=Ethylene-responsive element-binding factor 4; Short=EREBP-4; AltName: Full=Protein RELATED TO APETALA2 5 && PF00847:AP2 domain
BnaA03g00730D	-1.71577	4.26859e-06	-1.9041	0.012385	-1.99811	0.00097009	Q9LYY2.1 Mitochondrial import inner membrane translocase subunit TIM14-3; AltName: Full=Chaperone DnaJ-domain containing protein 3 && -
BnaA03g23850D	-1.74573	0.00149356	-1.54871	0.00165061	-1.93289	0.00140219	PF00646:F-box domain
BnaA03g26400D	-2.36253	3.54238e-13	-2.16127	1.4951e-07	-1.93181	3.71842e-07	Q8RWW0.1 Receptor-like serine/threonine-protein kinase ALE2; AltName: Full=Protein ABNORMAL LEAF SHAPE 2; Flags: Precursor && PF07714:Protein tyrosine kinase
BnaA03g26090D	-1.92491	4.67718e-27	-1.66755	5.07321e-06	-1.92245	3.338e-06	PF01990:ATP synthase (F/14-kDa) subunit
BnaA03g28720D	-2.24042	7.88952e-08	-1.8703	0.026746	-1.91826	0.0155028	Q9SR07.1 Probable WRKY transcription factor 39; AltName: Full=WRKY DNA-binding protein 39 && PF10533:Plant zinc cluster domain|PF03106:WRKY DNA -binding domain
BnaA03g02950D	-1.63075	2.47318e-11	-1.94855	0.000304466	-1.87736	1.46824e-08	PF04387:Protein tyrosine phosphatase-like protein, PTPLA
BnaA03g24630D	-1.66154	1.0761e-09	-1.58804	0.00140416	-1.83889	8.71467e-10	PF15870:ElonginA binding-protein 1|PF00628:PHD-finger
BnaA03g01810D	-1.73896	1.49361e-07	-1.69374	9.10405e-05	-1.79666	1.44254e-05	PF03208:PRA1 family protein
BnaA03g23320D	-2.14829	1.82307e-12	-1.72839	3.05875e-07	-1.79505	3.38077e-05	PF07946:Protein of unknown function (DUF1682)
BnaA03g23480D	-1.4149	1.96638e-10	-1.43519	0.00333681	-1.74009	5.79195e-10	Q9M643.1 Cycloeucalenol cycloisomerase; AltName: Full=Cycloeucalenol--obtusifoliol isomerase; AltName: Full=Cyclopropyl sterol isomerase && -
BnaA03g31490D	-1.56641	0.0175629	-2.4968	0.0174762	-1.73771	0.0194416	PF07107:Wound-induced protein WI12
BnaA03g29420D	-1.6629	6.53169e-05	-1.6837	6.32517e-06	-1.66048	6.1981e-05	PF00642:Zinc finger C-x8-C-x5-C-x3-H type (and similar)
BnaA03g31760D	-1.78771	0.000232399	-1.786	0.0112278	-1.6344	0.000535341	PF04133:Vacuolar protein sorting 55
BnaA03g26150D	-1.70153	9.53684e-12	-1.45636	0.000716375	-1.58661	3.24828e-08	O22775.1 Xyloglucan 6-xylosyltransferase 2; Short=AtXT2; AltName: Full=Putative glycosyltransferase 2; Short=AtGT2 && PF05637:galactosyl transferase GMA12/MNN10 family
BnaA03g27170D	-1.67281	1.80577e-05	-1.8605	0.000137447	-1.52609	0.00306377	PF00635:MSP (Major sperm protein) domain
BnaA03g02890D	-1.28407	7.03852e-10	-1.2599	0.0297491	-1.50977	0.00539392	P08903.2 Histone H3.2 && PF00125:Core histone H2A/H2B/H3/H4
BnaA03g23300D	-1.20674	3.70369e-08	-1.27414	3.83201e-06	-1.50507	2.44764e-08	Q8CCP0.2 Nuclear export mediator factor Nemf; AltName: Full=Serologically defined colon cancer antigen 1 homolog && PF05833:Fibronectin-binding protein A N-terminus (FbpA)|PF11923:Domain of unknown function (DUF3441)|PF05670:Domain of unknown function (DUF814)
BnaA03g03560D	-1.76381	1.53496e-07	-1.43849	0.000925786	-1.49745	7.95832e-06	PF01058:NADH ubiquinone oxidoreductase, 20 Kd subunit
BnaA03g24170D	-1.49411	2.61082e-10	-1.21187	0.0221581	-1.49045	1.6107e-06	PF03151:Triose-phosphate Transporter family
BnaA03g21240D	-1.65497	2.42669e-13	-1.70661	6.51668e-07	-1.48325	4.85482e-06	PF00179:Ubiquitin-conjugating enzyme
BnaA03g57300D	-1.81283	3.77391e-12	-1.46634	0.0145333	-1.46798	0.00330518	PF13414:TPR repeat
BnaA03g33710D	-1.19359	0.0260047	-1.37496	0.038491	-1.41256	0.000784278	O49500.1 E3 ubiquitin-protein ligase MBR2; AltName: Full=HAL3-interacting protein 1 homolog; Short=AtHIP1; AltName: Full=MED25-binding RING-H2 protein 2; AltName: Full=RING-H2 finger MBR2 && PF13639:Ring finger domain
BnaA03g30990D	-1.11512	7.43489e-08	-1.12363	4.531e-05	-1.40854	3.38967e-07	Q9SR93.2 LIMR family protein At3g08930 && PF04791:LMBR1-like membrane protein
BnaA03g26900D	-1.7053	5.41212e-09	-1.64807	0.00134723	-1.39422	0.0325477	PF03407:Nucleotide-diphospho-sugar transferase
BnaA03g01600D	-1.65949	2.25606e-07	-1.5957	3.77891e-06	-1.33453	0.000330863	P81898.2 Peptide-N4-(N-acetyl-beta-glucosaminyl)asparagine amidase A; Short=PNGase A; AltName: Full=Glycopeptide N-glycosidase; AltName: Full=N-glycanase; Contains: Peptide-N4-(N-acetyl-beta-glucosaminyl)asparagine amidase A light chain; AltName: Full=PNGase A small chain; AltName: Full=PNGase A subunit B; Contains: Peptide-N4-(N-acetyl-beta-glucosaminyl)asparagine amidase A heavy chain; AltName:…
BnaA03g55250D	-1.18673	1.1304e-06	-1.50806	0.0016987	-1.33155	0.000374935	PF15459:60S ribosome biogenesis protein Rrp14|PF04935:Surfeit locus protein 6
BnaA03g00360D	-1.57927	7.5248e-09	-1.56165	0.00570085	-1.27568	0.00359513	PF16041:Domain of unknown function (DUF4793)|PF13920:Zinc finger, C3HC4 type (RING finger)|PF16040:Domain of unknown function (DUF4792)
BnaA03g02560D	-1.54168	1.11288e-12	-1.36076	0.00468468	-1.27358	0.000683472	PF02887:Pyruvate kinase, alpha/beta domain|PF00224:Pyruvate kinase, barrel domain
BnaA03g27950D	-1.30183	1.99854e-12	-1.20024	2.98728e-06	-1.26045	0.00172129	Q9SP07.1 14-3-3-like protein && PF00244:14-3-3 protein
BnaA03g01260D	-1.26734	3.11181e-10	-1.35541	4.20838e-08	-1.16522	0.00217582	PF13418:Galactose oxidase, central domain|PF01344:Kelch motif|PF13415:Galactose oxidase, central domain
BnaA03g26170D	-1.17985	5.73201e-08	-1.50003	1.12185e-07	-1.14939	0.00531316	PF04969:CS domain
BnaA03g01760D	-1.08252	3.69446e-06	-1.24641	6.75358e-08	-1.07003	0.00166284	PF01398:JAB1/Mov34/MPN/PAD-1 ubiquitin protease|PF13012:Maintenance of mitochondrial structure and function
BnaA03g26680D	1.02651	1.61622e-05	1.38977	7.16488e-06	1.03855	0.0002028	PF04437:RINT-1 / TIP-1 family|PF08318:COG4 transport protein
BnaA03g04330D	1.12433	3.43499e-05	1.04232	0.00780033	1.03951	0.00614296	PF02921:Ubiquinol cytochrome reductase transmembrane region|PF00355:Rieske [2Fe-2S] domain
BnaA03g20080D	1.32041	7.76909e-06	1.04584	0.0135031	1.13176	0.00139275	Q67YI9.1 Clathrin interactor EPSIN 2; AltName: Full=EPSIN-related 2 && PF01417:ENTH domain
BnaA03g29560D	1.2463	2.81352e-07	1.02551	0.00929689	1.15719	1.32379e-05	PF04802:Component of IIS longevity pathway SMK-1
BnaA03g56560D	1.41925	6.13552e-09	1.22545	0.0320531	1.22682	0.000808344	PF13012:Maintenance of mitochondrial structure and function|PF01398:JAB1/Mov34/MPN/PAD-1 ubiquitin protease
BnaA03g25620D	1.09101	6.69467e-06	1.43633	0.00426047	1.26762	0.000525191	PF00462:Glutaredoxin|PF00085:Thioredoxin
BnaA03g27840D	1.32826	8.02352e-09	1.2697	9.83989e-08	1.27494	1.46912e-06	Q9FWA4.1 Probable galacturonosyltransferase 9 && PF01501:Glycosyl transferase family 8
BnaA03g04360D	1.52743	0.000546109	1.52499	0.000473868	1.29134	0.0140439	Q6NLV4.1 Flowering time control protein FY && PF00400:WD domain, G-beta repeat
BnaA03g22610D	1.07346	0.00420288	1.40656	4.3705e-05	1.32954	0.000148854	PF00682:HMGL-like
BnaA03g19600D	1.35143	5.43414e-05	1.9169	7.18741e-05	1.39152	0.00175524	O22944.1 Protein N-terminal glutamine amidohydrolase; AltName: Full=Protein NH2-terminal glutamine deamidase; Short=N-terminal Gln amidase; Short=Nt(Q)-amidase && PF09764:N-terminal glutamine amidase
BnaA03g30560D	1.66496	1.07109e-07	1.70195	1.06331e-09	1.40352	0.0416144	PF00164:Ribosomal protein S12/S23
BnaA03g22860D	1.33183	0.00201929	1.53968	0.0137551	1.48083	0.0091054	Q68EH9.1 Protein cereblon; Short=zcrbn && PF02190:ATP-dependent protease La (LON) substrate-binding domain
BnaA03g19260D	2.21776	7.8241e-10	1.1247	0.0420804	1.48191	0.000864032	PF00481:Protein phosphatase 2C|PF00069:Protein kinase domain
BnaA03g26770D	1.30815	9.8115e-06	1.20422	0.000796563	1.49844	0.000521641	Q07G43.1 Protein SDE2 homolog && PF13297:Telomere stability C-terminal|PF13019:Telomere stability and silencing
BnaA03g31340D	1.70785	7.29453e-08	1.87264	1.43018e-05	1.51768	0.00129609	PF00005:ABC transporter
BnaA03g29410D	1.88579	1.76094e-12	2.11977	0.00239774	1.53618	0.000149188	PF01488:Shikimate / quinate 5-dehydrogenase|PF08501:Shikimate dehydrogenase substrate binding domain|PF01487:Type I 3-dehydroquinase
BnaA03g17800D	1.42231	3.41647e-05	1.42889	0.0375296	1.58225	0.0486487	PF00141:Peroxidase
BnaA03g48360D	1.79983	0.000689531	1.51065	0.00283507	1.6539	0.00514908	PF14438:Ataxin 2 SM domain
BnaA03g31380D	1.30356	0.000394366	1.44202	0.0111451	1.7105	0.00637681	PF06964:Alpha-L-arabinofuranosidase C-terminus
BnaA03g20620D	1.88752	4.52842e-06	2.24122	6.09578e-06	1.84427	0.00144126	PF03168:Late embryogenesis abundant protein
BnaA03g36460D	1.79972	1.21121e-05	3.10108	0.000418121	1.86145	0.000342067	Q9LSY5.2 UDP-glycosyltransferase 71B7 && PF00201:UDP-glucoronosyl and UDP-glucosyl transferase
BnaA03g29000D	1.68195	7.8891e-07	2.48322	6.64087e-08	1.95486	8.42755e-07	PF13415:Galactose oxidase, central domain|PF01344:Kelch motif|PF00887:Acyl CoA binding protein
BnaA03g29570D	2.71399	1.98784e-14	1.888	2.46029e-12	2.00707	0.000120669	PF01779:Ribosomal L29e protein family
BnaA03g32750D	2.32463	2.56551e-06	2.31808	0.0180103	2.02301	0.000996058	Q9FYB5.2 Chaperone protein dnaJ 11, chloroplastic; Short=AtDjC11; Short=AtJ11; Flags: Precursor && PF00226:DnaJ domain
BnaA03g20740D	1.68485	4.43598e-08	2.63145	8.23152e-11	2.04496	8.18618e-08	PF13499:EF-hand domain pair
BnaA03g22850D	2.22554	2.56468e-11	2.47202	1.81635e-06	2.19051	5.8538e-06	PF01925:Sulfite exporter TauE/SafE
BnaA03g10680D	1.88435	2.28409e-05	2.10012	0.000466675	2.26377	2.11579e-05	P54970.2 IAA-amino acid hydrolase ILR1-like 2; Flags: Precursor && PF01546:Peptidase family M20/M25/M40|PF07687:Peptidase dimerisation domain
BnaA03g18370D	1.94439	2.34689e-06	2.021	2.43241e-09	2.36185	6.22281e-06	PF10167:Uncharacterised conserved protein
BnaA03g32620D	2.21883	0.000152073	2.64323	0.000738118	2.5173	0.000295527	PF01852:START domain
BnaA03g17670D	2.38683	4.9636e-10	2.41421	1.32315e-05	2.6363	1.43316e-08	PF00462:Glutaredoxin
BnaA03g57410D	2.72997	0.00197503	2.44291	0.00892725	2.65575	6.25095e-05	PF00403:Heavy-metal-associated domain
BnaA03g23570D	3.31371	3.25224e-23	3.28188	1.61337e-19	2.65902	8.28933e-11	Q8R2N2.3 U3 small nucleolar RNA-associated protein 4 homolog; AltName: Full=Cirhin; AltName: Full=Testis-expressed gene 292 protein && -
BnaA03g30400D	3.60461	1.52225e-12	2.88702	3.74638e-09	2.75614	7.2564e-07	PF00291:Pyridoxal-phosphate dependent enzyme|PF00585:C-terminal regulatory domain of Threonine dehydratase
BnaA03g30150D	2.99144	5.30187e-05	3.43834	1.8553e-05	2.83406	2.20294e-05	PF07647:SAM domain (Sterile alpha motif)
BnaA03g44640D	3.29159	2.50522e-30	3.11086	1.84262e-08	2.84519	1.29646e-11	P29517.1 Tubulin beta-9 chain; AltName: Full=Beta-9-tubulin && PF00091:Tubulin/FtsZ family, GTPase domain|PF03953:Tubulin C-terminal domain
BnaA03g21990D	3.33701	0.0365877	2.71611	0.0492639	2.87964	0.0211182	PF00106:short chain dehydrogenase
BnaA03g24380D	3.40482	4.76929e-19	3.18762	2.68396e-11	3.01026	2.7749e-08	Q9SZY1.1 Nascent polypeptide-associated complex subunit alpha-like protein 4; Short=NAC-alpha-like protein 4; AltName: Full=Alpha-NAC-like protein 4 && PF01849:NAC domain
BnaA03g41920D	3.66749	6.29512e-30	3.3476	7.81868e-08	3.25672	7.59482e-14	PF01027:Inhibitor of apoptosis-promoting Bax1
BnaA03g26670D	7.10212	4.12411e-06	3.10532	0.00772646	3.39364	0.00227065	PF03168:Late embryogenesis abundant protein
BnaA03g28730D	3.54772	8.41193e-22	3.65812	2.47625e-06	3.54977	3.69936e-17	PF16575:mRNA cleavage and polyadenylation factor CLP1 P-loop|PF16573:N-terminal beta-sandwich domain of polyadenylation factor|PF06807:Pre-mRNA cleavage complex II protein Clp1
BnaA03g24790D	2.38562	0.00286236	2.41088	0.0104803	3.73919	0.00246639	Q9LDM5.1 Putative cysteine-rich receptor-like protein kinase 31; Short=Cysteine-rich RLK31; Flags: Precursor && PF01657:Salt stress response/antifungal
BnaA03g58160D	3.8485	0.00097255	5.01195	0.0182364	3.98042	0.00992396	PF00152:tRNA synthetases class II (D, K and N)
BnaA03g08040D	4.39161	9.63696e-13	4.06033	1.26417e-10	4.08925	4.37049e-09	PF00544:Pectate lyase|PF03016:Exostosin family
BnaA03g57190D	6.39218	4.36631e-14	5.3921	6.53305e-10	4.30208	4.19854e-13	PF12706:Beta-lactamase superfamily domain
BnaA03g21260D	5.01824	0.000381711	3.7511	0.00197489	4.52337	0.000500031	PF04564:U-box domain
BnaA03g20700D	3.71066	6.282e-10	4.30604	1.05623e-10	4.54314	2.34452e-12	PF04484:Family of unknown function (DUF566)
BnaA03g29500D	4.33189	3.38493e-36	5.77335	7.15893e-11	4.56412	5.95967e-19	PF08544:GHMP kinases C terminal|PF10509:Galactokinase galactose-binding signature|PF00288:GHMP kinases N terminal domain
BnaA03g22680D	3.99818	2.82057e-18	4.5971	4.65209e-12	4.69287	2.27267e-15	PF03105:SPX domain
BnaA03g27550D	5.82776	1.55e-35	5.95291	3.43594e-15	5.16809	3.67463e-16	PF01263:Aldose 1-epimerase
BnaA03g45240D	4.20076	1.80892e-09	5.62572	3.52293e-05	5.23582	1.11911e-05	PF00133:tRNA synthetases class I (I, L, M and V)|PF08264:Anticodon-binding domain of tRNA
BnaA03g29990D	5.57983	2.43504e-60	6.05518	8.21605e-19	5.84475	1.71438e-48	PF04526:Protein of unknown function (DUF568)
BnaA03g22740D	6.20342	3.28849e-46	5.55733	4.56727e-28	6.09748	3.79892e-63	PF07816:Protein of unknown function (DUF1645)
BnaA03g29860D	6.42227	8.57816e-05	6.54723	5.61836e-05	6.38096	0.00023453	PF00271:Helicase conserved C-terminal domain
BnaA03g31390D	7.02141	3.53751e-06	7.47906	6.53093e-07	6.88937	1.29292e-05	PF01679:Proteolipid membrane potential modulator
BnaA03g46110D	4.89092	0.00938026	5.55353	0.000460665	7.53251	2.61129e-05	Q9LW86.1 Probable sulfate transporter 3.4 && PF01740:STAS domain|PF00916:Sulfate permease family
BnaA03g30540D	8.53956	1.5529e-10	9.34704	2.22816e-11	8.4626	1.6716e-09	PF04689:DNA binding protein S1FA
BnaA03g34540D	5.80377	1.41019e-08	6.6993	8.31406e-08	8.48868	1.86707e-09	PF13499:EF-hand domain pair|PF04607:Region found in RelA / SpoT proteins|PF13328:HD domain

## Sheet: Chromosome A8
Table S8. Differentially expressed genes (DEGs) identified in chromosome A8. In this case, comparisons were made between inoculated clubroot resistant (CR) and inoculated clubroot susceptible (CS) genotypes. Res1 = Resistant genotype at 1 day post inoculation, Res4 = Resistant genotype at 4 day post inoculation, and Res7 = Resistant genotype at 7 day post inoculation. Sus1 = Susceptible genotype …
gene_id	Res1_TvsSus1_T_log2FoldChange	Res1_TvsSus1_T_padj	Res4_TvsSus4_T_log2FoldChange	Res4_TvsSus4_T_padj	Res7_TvsSus7_T_log2FoldChange	Res7_TvsSus7_T_padj	gene_description
BnaA08g02930D	-9.11136	6.19655e-38	-12.0939	5.88815e-20	-11.9363	3.51662e-19	PF00076:RNA recognition motif. (a.k.a. RRM, RBD, or RNP domain)
BnaA08g23750D	-11.3028	5.27567e-19	-8.56768	4.22994e-18	-9.30127	7.81005e-15	PF03556:Cullin binding
BnaA08g24020D	-8.48715	9.04654e-10	-9.19589	2.30846e-11	-8.85415	1.68126e-10	PF00179:Ubiquitin-conjugating enzyme
BnaA08g09210D	-5.73688	3.80013e-13	-5.11973	2.75831e-10	-8.84616	3.82057e-10	PF01582:TIR domain|PF00931:NB-ARC domain|PF07725:Leucine Rich Repeat|PF12799:Leucine Rich repeats (2 copies)
BnaA08g24240D	-9.38152	9.10522e-13	-8.55072	2.09024e-08	-8.62973	1.44296e-09	PF06880:Protein of unknown function (DUF1262)
BnaA08g19030D	-8.54947	2.39083e-10	-8.52638	1.70275e-09	-8.02527	1.34787e-07	PF01344:Kelch motif
BnaA08g23720D	-7.04924	4.71468e-09	-5.39951	8.34312e-09	-8.02347	9.92544e-09	PF12352:Snare region anchored in the vesicle membrane C-terminus
BnaA08g26420D	-7.65871	1.77736e-42	-6.18995	3.16541e-45	-7.54164	7.10048e-32	PF16114:ATP citrate lyase citrate-binding|PF08442:ATP-grasp domain
BnaA08g28440D	-5.96864	6.14589e-15	-6.24915	1.28558e-12	-7.32796	1.08725e-09	Q04088.1 Probable transcription factor PosF21; AltName: Full=bZIP transcription factor 59; Short=AtbZIP59 && PF00170:bZIP transcription factor
BnaA08g26310D	-4.42332	9.00893e-13	-5.26344	1.56883e-09	-6.92544	3.09898e-06	F4I107.1 Pectin acetylesterase 1; Flags: Precursor && PF03283:Pectinacetylesterase
BnaA08g00160D	-4.49701	0.000363163	-4.09801	0.00543808	-6.60009	0.000105591	PF08325:WLM domain
BnaA08g08320D	-4.7619	0.0110524	-6.5433	0.00172972	-6.47839	0.00236241	PF02535:ZIP Zinc transporter
BnaA08g19980D	-5.74446	2.40141e-14	-5.68129	7.54278e-11	-6.29285	4.85894e-09	Q42351.1 60S ribosomal protein L34-1 && PF01199:Ribosomal protein L34e
BnaA08g29240D	-5.45707	0.00703059	-6.69176	3.24632e-05	-6.05543	0.000198684	PF05794:T-complex protein 11
BnaA08g06910D	-6.25731	0.000137716	-5.60564	0.00425891	-5.7829	0.00248285	PF00447:HSF-type DNA-binding
BnaA08g21600D	-5.21182	1.42428e-06	-5.26255	4.57178e-39	-5.39738	3.51787e-32	PF00112:Papain family cysteine protease
BnaA08g22390D	-7.2005	1.52639e-21	-4.72047	2.36324e-08	-5.15008	3.52656e-06	F4ICD9.1 Protein transport protein SEC31 homolog A; AltName: Full=SEC31-like protein A && PF12931:Sec23-binding domain of Sec16
BnaA08g22890D	-5.55486	1.67487e-26	-4.94489	0.000682996	-5.02632	0.015891	PF00197:Trypsin and protease inhibitor
BnaA08g09220D	-6.59609	8.51932e-30	-5.50263	6.03133e-18	-5.01823	8.77607e-10	O48573.1 Disease resistance protein LAZ5; AltName: Full=Protein LAZARUS 5; AltName: Full=Protein TOLERANCE TO TOBACCO RINGSPOT VIRUS 1 && PF01582:TIR domain|PF00931:NB-ARC domain|PF13855:Leucine rich repeat
BnaA08g26290D	-5.81677	0.000992753	-5.68181	0.00267234	-5.01219	0.037347	PF04678:Mitochondrial calcium uniporter
BnaA08g31100D	-4.3659	2.87581e-19	-4.09119	2.30827e-06	-5.00308	1.19221e-06	PF00479:Glucose-6-phosphate dehydrogenase, NAD binding domain|PF02781:Glucose-6-phosphate dehydrogenase, C-terminal domain
BnaA08g23450D	-4.70816	2.02081e-31	-4.80862	4.63688e-22	-4.98276	5.84252e-28	PF00179:Ubiquitin-conjugating enzyme
BnaA08g06940D	-3.71557	7.14964e-06	-4.34905	4.10965e-10	-4.92185	4.22176e-12	PF12174:RCD1-SRO-TAF4 (RST) plant domain
BnaA08g24660D	-3.09425	0.0249755	-3.56016	0.000446777	-4.73733	0.000123855	Q38Q39.1 Ethylene-responsive transcription factor ERF027 && PF00847:AP2 domain
BnaA08g00640D	-6.0272	0.000393103	-4.23961	0.00197742	-4.72425	0.0166716	PF00244:14-3-3 protein
BnaA08g16710D	-3.54282	7.94346e-13	-6.39644	7.41205e-10	-4.67551	7.75039e-13	PF00459:Inositol monophosphatase family
BnaA08g05710D	-5.30787	5.0744e-14	-4.95088	6.24521e-11	-4.64536	5.96719e-10	PF00201:UDP-glucoronosyl and UDP-glucosyl transferase
BnaA08g23000D	-6.24117	0.000194165	-5.21505	8.85649e-09	-4.59964	0.000217429	PF06888:Putative Phosphatase
BnaA08g24250D	-7.06037	3.61672e-06	-6.36277	0.000228352	-4.34037	0.0181369	PF06880:Protein of unknown function (DUF1262)
BnaA08g13350D	-5.77157	0.00126534	-3.60533	0.00211546	-4.3335	0.00433234	P06802.4 Ectonucleotide pyrophosphatase/phosphodiesterase family member 1; Short=E-NPP 1; AltName: Full=Lymphocyte antigen 41; Short=Ly-41; AltName: Full=Phosphodiesterase I/nucleotide pyrophosphatase 1; AltName: Full=Plasma-cell membrane glycoprotein PC-1; Includes: Alkaline phosphodiesterase I; Includes: Nucleotide pyrophosphatase; Short=NPPase; AltName: Full=Nucleotide diphosphatase && PF01663…
BnaA08g21410D	-5.44212	1.83975e-11	-3.8071	0.00043747	-4.31356	6.82541e-06	PF13947:Wall-associated receptor kinase galacturonan-binding|PF07714:Protein tyrosine kinase|PF07645:Calcium-binding EGF domain
BnaA08g07530D	-3.7297	6.34332e-13	-3.39249	0.0115782	-4.22765	6.44258e-08	O81770.1 Monogalactosyldiacylglycerol synthase 1, chloroplastic; Short=AtMGD1; AltName: Full=MGDG synthase type A; Flags: Precursor && PF06925:Monogalactosyldiacylglycerol (MGDG) synthase
BnaA08g13110D	-3.81774	2.05938e-10	-8.12929	4.09545e-08	-4.02607	5.60163e-07	PF00722:Glycosyl hydrolases family 16|PF06955:Xyloglucan endo-transglycosylase (XET) C-terminus
BnaA08g07020D	-3.78776	1.54507e-10	-4.52917	7.82191e-09	-4.00278	4.77795e-06	Q9C551.1 DEAD-box ATP-dependent RNA helicase 5 && PF00271:Helicase conserved C-terminal domain|PF00270:DEAD/DEAH box helicase
BnaA08g24200D	-3.42945	2.8542e-20	-3.69446	5.33957e-16	-3.77993	2.00068e-07	Q9LMG7.1 Probable inactive purple acid phosphatase 2; Flags: Precursor && PF16656:Purple acid Phosphatase, N-terminal domain|PF00149:Calcineurin-like phosphoesterase|PF14008:Iron/zinc purple acid phosphatase-like protein C
BnaA08g08600D	-3.95803	5.23013e-08	-2.20819	0.0173385	-3.65705	6.25831e-05	Q0WRB9.1 Probable purine permease 8; Short=AtPUP8 && PF16913:Purine nucleobase transmembrane transport
BnaA08g24210D	-3.42374	1.56526e-21	-3.31878	8.90972e-05	-3.51738	6.15445e-10	PF01448:ELM2 domain
BnaA08g26270D	-3.32381	3.84848e-35	-3.43173	2.49023e-29	-3.32371	1.42879e-07	PF01157:Ribosomal protein L21e
BnaA08g16670D	-3.48139	0.00345017	-3.64806	0.00696417	-3.28994	0.041087	F4JVA9.1 Phosphatidylinositol/phosphatidylcholine transfer protein SFH2; AltName: Full=Protein SEC FOURTEEN HOMOLOGS 2; Short=AtSFH2 && PF03765:CRAL/TRIO, N-terminal domain|PF00650:CRAL/TRIO domain
BnaA08g24230D	-4.39622	1.87375e-12	-5.4518	3.95632e-13	-3.2894	2.81834e-05	Q9SD84.1 PLASMODESMATA CALLOSE-BINDING PROTEIN 2; Short=AtPDCB2; AltName: Full=Glucan endo-1,3-beta-glucosidase-like protein 3; Flags: Precursor && PF07983:X8 domain
BnaA08g30700D	-4.30211	0.025646	-4.5339	0.000261668	-3.2741	0.000414715	PF02362:B3 DNA binding domain
BnaA08g02260D	-2.42259	2.44276e-08	-3.21465	9.45018e-09	-3.27075	2.82911e-06	Q9M0V4.1 U3 snoRNP-associated protein-like YAO && -
BnaA08g00090D	-3.51031	2.62304e-11	-2.79111	4.59524e-08	-2.89061	3.32441e-05	PF13414:TPR repeat
BnaA08g11190D	-2.20812	3.36906e-13	-2.75933	7.48948e-17	-2.88946	1.70382e-14	Q8VY05.3 SWI/SNF complex subunit SWI3D; Short=AtSWI3D; AltName: Full=Transcription regulatory protein SWI3D && PF16495:SWIRM-associated region 1|PF00249:Myb-like DNA-binding domain|PF00569:Zinc finger, ZZ type|PF04433:SWIRM domain
BnaA08g23230D	-2.12622	0.0131473	-3.48259	0.00383416	-2.87167	0.000952946	Q9C7S5.1 Tyrosine-sulfated glycopeptide receptor 1; AltName: Full=PSY1 receptor && PF13855:Leucine rich repeat|PF08263:Leucine rich repeat N-terminal domain
BnaA08g23760D	-2.61464	0.00262718	-2.13962	0.0476409	-2.82611	0.00234527	PF00504:Chlorophyll A-B binding protein
BnaA08g18170D	-2.63019	8.49959e-11	-2.36402	9.97807e-07	-2.7936	1.25014e-11	PF00468:Ribosomal protein L34
BnaA08g31440D	-2.74598	1.57388e-11	-2.24022	0.00629103	-2.77365	5.19853e-05	PF12483:E3 Ubiquitin ligase
BnaA08g17750D	-1.95748	4.92527e-10	-2.06417	0.00913203	-2.72882	2.6715e-07	PF06775:Putative adipose-regulatory protein (Seipin)
BnaA08g24150D	-2.08218	1.63747e-06	-2.07301	0.00441385	-2.69045	7.37324e-09	PF01105:emp24/gp25L/p24 family/GOLD
BnaA08g09050D	-1.61457	2.41924e-06	-2.82156	0.00554953	-2.63428	0.0262568	PF02221:ML domain
BnaA08g24160D	-2.74931	9.14215e-08	-3.38877	2.51167e-06	-2.6084	1.48767e-06	PF03106:WRKY DNA -binding domain
BnaA08g12330D	-1.99514	8.12898e-07	-2.3478	0.000112645	-2.56149	4.3012e-06	Q9SK27.2 Early nodulin-like protein 1; AltName: Full=Phytocyanin-like protein; Flags: Precursor && PF02298:Plastocyanin-like domain
BnaA08g02000D	-2.19573	1.33298e-09	-2.06329	1.19329e-05	-2.55768	2.08946e-07	PF00125:Core histone H2A/H2B/H3/H4|PF16211:C-terminus of histone H2A
BnaA08g19540D	-2.73109	5.41736e-25	-2.53738	7.44032e-07	-2.52098	1.68884e-10	PF04502:Family of unknown function (DUF572)
BnaA08g27200D	-1.52552	0.0118072	-2.19071	2.20734e-05	-2.49447	1.5947e-05	PF01764:Lipase (class 3)
BnaA08g24280D	-1.83914	0.0385527	-2.6738	0.0282889	-2.47591	0.0116384	Q9FMA1.1 Pentatricopeptide repeat-containing protein At5g56310 && PF13041:PPR repeat family
BnaA08g28210D	-2.18185	0.00250866	-2.30737	0.0035189	-2.42686	0.000247233	PF00141:Peroxidase
BnaA08g28040D	-2.43617	0.000146964	-2.45679	1.58749e-05	-2.42013	3.6288e-05	PF00108:Thiolase, N-terminal domain|PF02803:Thiolase, C-terminal domain
BnaA08g28490D	-3.27319	1.75024e-07	-2.60252	0.00147313	-2.29309	0.0193042	PF16004:116 kDa U5 small nuclear ribonucleoprotein component N-terminus
BnaA08g24140D	-1.97756	3.32777e-09	-2.03233	2.74752e-07	-2.28986	6.03221e-10	PF10250:GDP-fucose protein O-fucosyltransferase
BnaA08g24550D	-2.49829	1.62274e-36	-2.27967	2.32697e-22	-2.23324	4.63859e-08	PF03223:V-ATPase subunit C
BnaA08g24220D	-1.60463	0.000109642	-2.11224	0.0252836	-2.16942	0.00144785	Q9LMH0.1 Protein KTI12 homolog; Short=AtKTI12; AltName: Full=At1g13870; AltName: Full=Protein DEFORMED ROOTS AND LEAVES 1; Short=AtDRL1; AltName: Full=Protein ELONGATA4 && PF08433:Chromatin associated protein KTI12
BnaA08g17480D	-2.24027	9.08381e-18	-2.27564	3.53321e-21	-2.16512	2.57168e-05	PF00736:EF-1 guanine nucleotide exchange domain
BnaA08g12980D	-1.28949	0.0353933	-2.11869	0.000366131	-2.13805	0.00495283	PF02575:YbaB/EbfC DNA-binding family
BnaA08g26530D	-2.06521	3.33193e-10	-2.41821	6.36237e-12	-2.13	3.05612e-05	Q38858.3 Calreticulin-2; Flags: Precursor && PF00262:Calreticulin family
BnaA08g00720D	-2.0282	0.00223803	-2.31858	1.21135e-05	-2.11693	0.000267993	Q8RWA2.1 Mediator of RNA polymerase II transcription subunit 9 && -
BnaA08g12020D	-2.10285	1.01456e-07	-2.48377	1.89982e-07	-2.10775	1.06887e-06	Q9FFN2.2 Probable glycosyltransferase At5g03795 && PF03016:Exostosin family
BnaA08g01910D	-1.77014	2.64891e-05	-2.11827	7.27494e-07	-2.10494	9.90771e-08	PF06200:tify domain|PF06203:CCT motif|PF00320:GATA zinc finger
BnaA08g26300D	-2.64426	3.08636e-18	-2.67	2.50467e-08	-2.05837	8.05041e-11	P94014.2 Germin-like protein subfamily 2 member 1; Flags: Precursor && PF00190:Cupin
BnaA08g14300D	-2.02769	3.79894e-11	-2.51288	1.60563e-06	-2.05271	0.000607261	PF01025:GrpE
BnaA08g27820D	-1.78107	1.04772e-11	-1.80117	3.48079e-11	-1.96513	9.16425e-10	PF01590:GAF domain|PF00917:MATH domain
BnaA08g11450D	-1.82365	0.000294932	-1.78925	0.00256195	-1.94964	0.0027737	PF01336:OB-fold nucleic acid binding domain|PF00152:tRNA synthetases class II (D, K and N)|PF02938:GAD domain
BnaA08g24130D	-2.17205	1.6327e-09	-2.12723	0.00405876	-1.92965	0.00529872	PF07802:GCK domain
BnaA08g17110D	-1.89384	5.60865e-09	-2.09024	1.0336e-06	-1.92819	8.15926e-05	Q9SVE7.2 Protein DETOXIFICATION 45, chloroplastic; Short=AtDTX45; AltName: Full=Multidrug and toxic compound extrusion protein 45; Short=MATE protein 45; Flags: Precursor && PF01554:MatE|PF00300:Histidine phosphatase superfamily (branch 1)
BnaA08g22590D	-1.81453	4.95421e-09	-2.0084	1.03411e-10	-1.92635	0.00137124	PF03868:Ribosomal protein L6, N-terminal domain|PF01159:Ribosomal protein L6e
BnaA08g22640D	-1.52032	0.000148288	-1.70707	1.32942e-05	-1.89393	1.57253e-05	PF00022:Actin
BnaA08g15850D	-2.14096	5.31729e-08	-1.89183	4.37968e-05	-1.88483	7.45387e-05	PF13445:RING-type zinc-finger|PF10607:CTLH/CRA C-terminal to LisH motif domain
BnaA08g08360D	-1.75858	8.08272e-06	-1.58976	0.0228045	-1.85527	1.56457e-06	PF01245:Ribosomal protein L19
BnaA08g02140D	-1.94791	1.65152e-19	-1.99059	6.13536e-07	-1.80905	2.79446e-11	Q9LDU6.1 7-dehydrocholesterol reductase; Short=7-DHC reductase; AltName: Full=Protein DWARF 5; AltName: Full=Sterol Delta(7)-reductase && PF01222:Ergosterol biosynthesis ERG4/ERG24 family
BnaA08g00100D	-2.36064	4.25048e-13	-2.64805	2.29561e-13	-1.8021	7.9364e-08	PF00022:Actin
BnaA08g29450D	-1.3494	0.00207189	-1.20211	0.0177287	-1.80019	6.23306e-05	A6QRA1.1 DNA-directed RNA polymerase V subunit 7 && PF03876:SHS2 domain found in N terminus of Rpb7p/Rpc25p/MJ0397
BnaA08g02230D	-2.06206	1.50475e-18	-1.92062	2.25606e-09	-1.79313	1.22559e-09	PF00004:ATPase family associated with various cellular activities (AAA)
BnaA08g19460D	-2.07971	1.13941e-17	-1.87838	3.1274e-07	-1.77462	5.09547e-09	PF01169:Uncharacterized protein family UPF0016
BnaA08g19450D	-2.11061	1.68599e-09	-2.19757	0.000213261	-1.76658	8.21176e-07	Q869R1.1 CTL-like protein DDB_G0274487 && PF04515:Plasma-membrane choline transporter
BnaA08g26940D	-1.74639	2.19715e-08	-1.66532	5.56703e-06	-1.75613	3.8268e-08	O04153.2 Calreticulin-3; AltName: Full=Protein PRIORITY IN SWEET LIFE 1; Flags: Precursor && PF00262:Calreticulin family
BnaA08g00710D	-1.73788	1.09169e-10	-1.49575	8.08683e-08	-1.73055	6.43623e-08	PF00795:Carbon-nitrogen hydrolase|PF02540:NAD synthase
BnaA08g30740D	-2.149	5.59998e-17	-1.87653	1.89853e-05	-1.72933	0.000716267	PF00378:Enoyl-CoA hydratase/isomerase|PF02737:3-hydroxyacyl-CoA dehydrogenase, NAD binding domain|PF00725:3-hydroxyacyl-CoA dehydrogenase, C-terminal domain
BnaA08g09230D	-1.68774	4.12411e-06	-1.68763	0.00645268	-1.63511	0.00260559	PF10609:NUBPL iron-transfer P-loop NTPase
BnaA08g00080D	-1.46498	8.03092e-08	-1.74081	5.93541e-07	-1.61836	1.97036e-05	PF01798:snoRNA binding domain, fibrillarin|PF08156:NOP5NT (NUC127) domain
BnaA08g28130D	-1.50821	0.000104762	-1.20238	0.0280536	-1.59842	0.00062132	PF04438:HIT zinc finger
BnaA08g19230D	-1.073	0.035292	-1.54649	0.043293	-1.55322	0.0453059	PF03331:UDP-3-O-acyl N-acetylglycosamine deacetylase
BnaA08g08340D	-1.55887	7.85801e-12	-1.45071	0.000635798	-1.54258	1.87619e-07	PF00071:Ras family
BnaA08g30290D	-1.71827	9.24716e-07	-1.4385	0.000561682	-1.47307	0.00175865	PF01336:OB-fold nucleic acid binding domain|PF00152:tRNA synthetases class II (D, K and N)
BnaA08g08330D	-1.34222	1.12443e-05	-1.17107	1.33411e-05	-1.46928	0.00116815	PF04774:Hyaluronan / mRNA binding family|PF09598:Stm1
BnaA08g00030D	-1.38228	1.31008e-10	-1.36047	7.32243e-07	-1.46189	7.81537e-08	PF03381:LEM3 (ligand-effect modulator 3) family / CDC50 family
BnaA08g18360D	-1.28112	5.38983e-09	-1.0061	0.00943941	-1.41148	9.02211e-08	PF07714:Protein tyrosine kinase
BnaA08g23130D	-1.27734	0.00014414	-1.66619	0.00788375	-1.40699	0.0385835	PF00334:Nucleoside diphosphate kinase
BnaA08g26520D	-1.4682	4.10162e-11	-1.39526	3.74777e-08	-1.31845	2.8112e-06	O80480.1 Importin subunit alpha-4; Short=IMPa-4 && PF00514:Armadillo/beta-catenin-like repeat|PF16186:Atypical Arm repeat|PF01749:Importin beta binding domain
BnaA08g23820D	-1.02732	0.0044379	-1.42203	0.000973955	-1.30679	0.00565712	PF04003:Dip2/Utp12 Family|PF00400:WD domain, G-beta repeat
BnaA08g20910D	-1.25269	0.00276379	-1.24533	0.0048054	-1.28413	0.00326753	E0X9N4.1 Zinc finger CCCH domain-containing protein 69; Short=AtC3H69 && PF13639:Ring finger domain
BnaA08g23940D	-1.16714	0.000550054	-1.26131	0.000262706	-1.26386	0.000215462	PF00628:PHD-finger|PF12165:Domain of unknown function (DUF3594)
BnaA08g15080D	-1.92469	0.000856851	-2.07271	0.0481148	-1.26289	0.0318307	PF00999:Sodium/hydrogen exchanger family
BnaA08g27440D	-1.33848	1.82792e-06	-1.36676	6.24259e-08	-1.2089	1.56592e-05	PF03909:BSD domain
BnaA08g01610D	-1.14131	0.00540174	-1.14916	0.0227703	-1.18083	0.00516422	C0LGP4.1 Probable LRR receptor-like serine/threonine-protein kinase At3g47570; Flags: Precursor && PF00069:Protein kinase domain
BnaA08g27600D	-1.43273	1.19575e-07	-1.2185	0.0162266	-1.08715	0.0384704	Q84TF4.2 Monothiol glutaredoxin-S13; Short=AtGrxS13; AltName: Full=Protein ROXY 18 && PF02841:Guanylate-binding protein, C-terminal domain|PF02263:Guanylate-binding protein, N-terminal domain
BnaA08g20790D	-1.39167	0.000141845	-1.35979	0.00802908	-1.0839	0.0072962	PF00854:POT family
BnaA08g31120D	-1.45753	1.50512e-08	-1.09637	0.000133539	-1.02398	0.00231683	PF07889:Protein of unknown function (DUF1664)
BnaA08g19100D	-1.12937	4.10152e-06	-1.2607	7.97204e-06	-1.01837	0.00581683	PF00118:TCP-1/cpn60 chaperonin family
BnaA08g14130D	-1.26987	6.72309e-09	-1.08578	0.000409524	-1.01593	0.00217707	PF01253:Translation initiation factor SUI1
BnaA08g00760D	1.0389	1.7131e-05	1.22436	6.10634e-05	1.04023	7.03544e-05	PF00271:Helicase conserved C-terminal domain|PF00270:DEAD/DEAH box helicase
BnaA08g00890D	1.12336	5.18655e-07	1.29955	4.36631e-05	1.06096	0.000210612	PF01699:Sodium/calcium exchanger protein
BnaA08g28880D	1.19426	5.70672e-09	1.11444	0.0467571	1.11109	0.018566	Q8RWG8.2 Ran-binding protein 1 homolog b && PF00638:RanBP1 domain
BnaA08g11470D	1.00733	7.59608e-06	1.06981	2.45664e-05	1.11206	0.00890429	PF00155:Aminotransferase class I and II
BnaA08g17220D	1.02726	2.00514e-07	1.08767	4.67467e-05	1.13545	0.000405203	PF00076:RNA recognition motif. (a.k.a. RRM, RBD, or RNP domain)
BnaA08g16340D	1.49501	6.316e-10	1.48322	2.1204e-06	1.25512	1.82798e-05	PF02037:SAP domain|PF16294:RNSP1-SAP18 binding (RSB) motif
BnaA08g01210D	1.31517	3.53751e-06	1.09696	3.66412e-05	1.29548	0.000267284	PF00085:Thioredoxin|PF13414:TPR repeat
BnaA08g22360D	1.41342	1.88275e-12	1.465	0.00192383	1.36779	0.000251227	PF13178:Protein of unknown function (DUF4005)|PF00612:IQ calmodulin-binding motif
BnaA08g02800D	1.25262	8.65405e-10	1.17143	3.83355e-05	1.37051	4.18502e-05	PF00071:Ras family
BnaA08g06420D	1.38972	0.0209598	1.43773	0.0276056	1.4089	0.0104894	B7SY83.1 FHA domain-containing protein PS1; AltName: Full=Protein PARALLEL SPINDLE 1; Short=AtPS1 && PF13638:PIN domain|PF00498:FHA domain
BnaA08g07670D	1.48279	0.000254879	1.65323	0.000114282	1.45155	0.0234341	PF00887:Acyl CoA binding protein
BnaA08g03720D	1.61789	5.87014e-09	1.63622	0.00126089	1.49894	0.0240418	PF01490:Transmembrane amino acid transporter protein
BnaA08g03920D	1.0781	0.0202201	1.62334	5.18014e-05	1.50126	0.00484899	Q0WPY0.1 Tubby-like F-box protein 6; Short=AtTLP6 && PF01167:Tub family|PF12937:F-box-like
BnaA08g28290D	1.46006	0.00190036	2.32422	0.000684896	1.55444	0.00153771	PF03478:Protein of unknown function (DUF295)
BnaA08g02870D	1.33785	0.000503092	1.5905	0.0160615	1.55573	0.0153677	PF02705:K+ potassium transporter
BnaA08g04030D	1.50641	0.00231714	2.42787	0.000264905	1.5678	0.00819419	PF00134:Cyclin, N-terminal domain|PF02984:Cyclin, C-terminal domain
BnaA08g10990D	1.47035	1.01742e-07	1.66708	0.00108742	1.5958	1.77528e-05	O23141.1 Arginine decarboxylase 2; Short=ADC 2; Short=ARGDC 2; AltName: Full=ADC-N && PF02784:Pyridoxal-dependent decarboxylase, pyridoxal binding domain
BnaA08g24030D	1.52756	0.000799878	1.43876	8.61129e-06	1.59871	0.000192031	PF00076:RNA recognition motif. (a.k.a. RRM, RBD, or RNP domain)
BnaA08g07270D	1.62394	1.43981e-06	1.56885	0.00556587	1.66873	0.00117921	PF16656:Purple acid Phosphatase, N-terminal domain|PF00149:Calcineurin-like phosphoesterase|PF14008:Iron/zinc purple acid phosphatase-like protein C
BnaA08g18190D	1.3437	0.000286965	1.41874	0.00111667	1.67421	0.000104665	Q8GYB1.2 Nudix hydrolase 15, mitochondrial; Short=AtNUDT15; AltName: Full=Coenzyme A diphosphatase NUDT15; Flags: Precursor && PF00293:NUDIX domain
BnaA08g14490D	1.58365	0.013353	2.26256	0.0341955	1.6917	0.000466826	PF00481:Protein phosphatase 2C
BnaA08g12810D	1.54694	0.000143785	2.21599	2.09732e-07	1.80448	7.49644e-05	PF03106:WRKY DNA -binding domain
BnaA08g08820D	1.54264	3.97633e-05	1.35684	0.00333388	1.81245	0.00148264	PF05212:Protein of unknown function (DUF707)
BnaA08g16290D	1.29347	0.00123098	1.20742	0.0214233	1.82203	0.000204829	Q8LAL0.1 Protein SCO1 homolog 2, mitochondrial; AltName: Full=Homolog of the copper chaperone SCO1 member 2; Short=HCC2; Flags: Precursor && PF02630:SCO1/SenC
BnaA08g21740D	1.88731	1.42134e-06	1.32805	0.000712642	1.84791	2.43107e-06	PF00134:Cyclin, N-terminal domain|PF02984:Cyclin, C-terminal domain
BnaA08g03510D	1.12774	0.0214604	1.4104	0.0158947	1.89617	0.000421483	PF08285:Dolichol-phosphate mannosyltransferase subunit 3 (DPM3)
BnaA08g07850D	2.04548	0.00169581	1.63625	0.00536253	1.92443	0.0139536	PF03372:Endonuclease/Exonuclease/phosphatase family
BnaA08g18270D	2.17383	0.00146176	3.00793	2.4313e-08	2.16488	0.000285618	Q9SGQ0.1 Transcription factor VOZ1; AltName: Full=Protein VASCULAR PLANT ONE-ZINC FINGER 1; Short=AtVOZ1 && -
BnaA08g16330D	2.09607	5.49831e-21	2.26602	1.00905e-14	2.16946	1.61313e-08	PF09731:Mitochondrial inner membrane protein
BnaA08g17500D	2.82064	0.00216042	2.73379	0.00679488	2.16974	0.0366529	PF03634:TCP family transcription factor
BnaA08g17210D	1.99356	3.60601e-19	2.03521	0.00271266	2.29215	2.34937e-09	PF12695:Alpha/beta hydrolase family
BnaA08g01300D	2.41876	9.16432e-20	2.48578	6.11958e-06	2.39265	3.13252e-06	O80340.1 Ethylene-responsive transcription factor 4; Short=AtERF4; AltName: Full=Ethylene-responsive element-binding factor 4; Short=EREBP-4; AltName: Full=Protein RELATED TO APETALA2 5 && PF00847:AP2 domain
BnaA08g06170D	2.59046	5.73978e-26	2.6736	1.72262e-17	2.4688	4.78443e-12	Q9T0H2.1 Small acidic protein 1 && -
BnaA08g18690D	2.75766	0.0332465	3.01318	0.0170316	2.48872	0.00196393	PF14368:Probable lipid transfer
BnaA08g10100D	3.03201	2.4904e-21	2.91485	8.70264e-14	2.71202	1.59271e-09	PF01582:TIR domain|PF00931:NB-ARC domain
BnaA08g03910D	2.77539	0.000403909	2.86199	0.0131617	2.78151	0.00346213	PF01554:MatE
BnaA08g24760D	3.08746	8.34536e-05	2.40699	0.00822504	2.80084	0.0020024	PF03311:Cornichon protein
BnaA08g12060D	5.28997	2.59164e-08	5.19558	7.4753e-08	2.89335	0.00189087	Q9FH05.1 Serine carboxypeptidase-like 42; Flags: Precursor && PF00450:Serine carboxypeptidase
BnaA08g17550D	3.71918	8.69106e-17	2.63315	1.23308e-06	2.90212	5.31942e-12	PF07103:Protein of unknown function (DUF1365)
BnaA08g24940D	2.51712	0.0154152	2.45682	0.00475227	3.26986	0.000562767	PF02115:RHO protein GDP dissociation inhibitor
BnaA08g03890D	3.54332	1.66606e-17	3.26845	5.94263e-11	3.27461	4.23041e-09	PF16860:CHCH-CHCH-like Cx9C, IMS import disulfide relay-system,
BnaA08g17340D	3.57344	6.54098e-28	3.74667	3.48628e-26	3.39458	1.57387e-17	PF00324:Amino acid permease|PF03522:Solute carrier family 12
BnaA08g19850D	1.65824	0.00611701	2.51467	0.0168121	3.41983	4.91456e-05	PF03124:EXS family|PF03105:SPX domain
BnaA08g03050D	2.96804	9.02188e-07	3.62467	2.79725e-09	3.48813	4.09476e-05	PF14368:Probable lipid transfer
BnaA08g13170D	3.18148	1.10205e-07	3.83983	7.19717e-07	3.70441	1.52681e-05	P19456.2 ATPase 2, plasma membrane-type; AltName: Full=Proton pump 2 && PF00702:haloacid dehalogenase-like hydrolase|PF00122:E1-E2 ATPase|PF00690:Cation transporter/ATPase, N-terminus
BnaA08g02910D	2.31476	3.70047e-05	3.75049	4.74244e-08	3.83355	2.54813e-07	PF00582:Universal stress protein family
BnaA08g28100D	3.16478	9.36634e-14	3.61238	0.000875178	4.01779	1.2971e-05	PF00505:HMG (high mobility group) box|PF01388:ARID/BRIGHT DNA binding domain
BnaA08g16790D	3.50374	1.2485e-19	4.86622	5.43318e-17	4.03499	5.61162e-15	PF13920:Zinc finger, C3HC4 type (RING finger)|PF00225:Kinesin motor domain
BnaA08g30900D	3.6821	7.0293e-12	3.17432	1.33597e-08	4.10569	5.20245e-12	PF00005:ABC transporter|PF07673:Protein of unknown function (DUF1602)
BnaA08g31060D	3.06994	5.54233e-07	2.94397	0.0451595	4.46535	0.000188689	PF04776:Protein of unknown function (DUF626)
BnaA08g07440D	5.06901	6.7048e-11	5.06373	4.57141e-07	4.96883	2.61716e-06	PF03367:ZPR1 zinc-finger domain
BnaA08g15660D	4.29144	0.0204821	4.66249	0.00180561	5.00654	6.23824e-05	PF00067:Cytochrome P450
BnaA08g11870D	5.59283	0.0037122	5.52188	0.0118498	5.47388	0.00747256	Q9SMY8.2 F-box/LRR-repeat protein 15 && -
BnaA08g27120D	5.90832	0.000319897	4.90249	0.0127574	5.65511	0.00077801	PF03330:Rare lipoprotein A (RlpA)-like double-psi beta-barrel|PF01357:Pollen allergen
BnaA08g26690D	6.09038	8.707e-12	8.10987	5.43031e-08	5.66695	1.43976e-11	PF00808:Histone-like transcription factor (CBF/NF-Y) and archaeal histone
BnaA08g12590D	5.28112	0.0259099	5.76898	0.00227625	5.79458	0.00446471	PF13639:Ring finger domain
BnaA08g20150D	5.4526	0.0057731	5.27316	0.0282709	5.93342	0.00153094	Q9FZJ3.2 Putative F-box/kelch-repeat protein At1g27420 && PF00931:NB-ARC domain|PF01344:Kelch motif|PF01582:TIR domain
BnaA08g04960D	5.25271	0.000116518	5.35781	0.00032429	6.01476	0.000136718	PF13414:TPR repeat
BnaA08g28650D	4.12797	3.48218e-10	3.94106	7.56944e-07	6.16681	1.31658e-08	PF16113:Enoyl-CoA hydratase/isomerase
BnaA08g18380D	5.54684	1.24408e-51	6.31488	4.55779e-21	6.16966	1.3623e-24	PF00847:AP2 domain
BnaA08g17580D	6.48165	1.47362e-05	4.84841	7.02343e-05	6.21199	0.00012194	PF00293:NUDIX domain
BnaA08g16190D	6.25564	0.000144839	6.32181	0.000184828	6.47381	8.92679e-05	PF10607:CTLH/CRA C-terminal to LisH motif domain
BnaA08g16300D	6.17206	5.874e-05	7.59513	2.55182e-07	6.4804	7.57682e-05	PF01582:TIR domain|PF00931:NB-ARC domain
BnaA08g20120D	6.66576	1.65932e-05	6.85325	1.79634e-05	6.50264	0.000293376	PF01762:Galactosyltransferase|PF00337:Galactoside-binding lectin
BnaA08g28660D	6.43521	5.88828e-05	6.75946	8.88191e-05	6.72179	6.50369e-05	Q9SHJ8.2 3-hydroxyisobutyryl-CoA hydrolase-like protein 5 && -
BnaA08g15730D	6.68207	0.000127412	6.42454	1.81912e-18	6.75165	2.60552e-24	O81108.1 Calcium-transporting ATPase 2, plasma membrane-type; AltName: Full=Ca(2+)-ATPase isoform 2 && PF12515:Ca2+-ATPase N terminal autoinhibitory domain|PF00690:Cation transporter/ATPase, N-terminus|PF00689:Cation transporting ATPase, C-terminus|PF00122:E1-E2 ATPase|PF12710:haloacid dehalogenase-like hydrolase
BnaA08g27240D	6.75963	3.49087e-12	5.93366	7.25283e-10	7.0468	1.6697e-07	PF01095:Pectinesterase|PF04043:Plant invertase/pectin methylesterase inhibitor
BnaA08g29420D	7.79433	3.24871e-08	7.67718	1.6538e-07	7.74648	1.56981e-07	PF05699:hAT family C-terminal dimerisation region
BnaA08g29410D	7.31945	9.96488e-08	8.35533	2.05248e-09	8.69524	5.79418e-09	PF02892:BED zinc finger|PF04937:Protein of unknown function (DUF 659)
BnaA08g19760D	8.60612	6.55776e-28	10.5237	1.33711e-15	9.6011	8.59214e-17	B1YK87.1 Foldase protein PrsA; Flags: Precursor && PF13616:PPIC-type PPIASE domain
