# Supplementary material for: Early-stage responses to Plasmodiophora brassicae at the transcriptome and metabolome levels in clubroot resistant and susceptible oilseed Brassica napus
Source: Royal Society of Chemistry journal article supplement (doi:10.1039/d2mo00251e), 2022-11-10
Supplement: d2mo00251e18.xlsx [file d2mo00251e18.xlsx]

## Sheet: CR Known QTL
Table S9. Genes that are related to known clubroot resistant (CR) quantitative trait loci (QTL) in Brassica spp. In this case, comparisons were made between inoculated clubroot resistant (CR) and inoculated clubroot susceptible (CS) genotypes. Res1 = Resistant genotype at 1 day post inoculation, Res4 = Resistant genotype at 4 day post inoculation, and Res7 = Resistant genotype at 7 day post inocu…
gene_id	QTLoci	Res1_TvsSus1_T_log2FoldChange	Res1_TvsSus1_T_padj	Res4_TvsSus4_T_log2FoldChange	Res4_TvsSus4_T_padj	Res7_TvsSus7_T_log2FoldChange	Res7_TvsSus7_T_padj
BnaA03g53280D_Putative Crr3	Brara_Chiifu_V3.0_A03_23823130_26806601_Rcr4	-9.446	3.78926e-11	-5.65463	4.54476e-06	-8.86895	3.72485e-10
BnaA08g24240D_Unknown function (DUF1262)	Brara_Chiifu_V3.0_A08_20254038_21748038_qBrCR38-2	-9.38152	9.10522e-13	-8.55072	2.09024e-08	-8.62973	1.44296e-09
BnaAnng36290D_AP2 domain	Brara_Chiifu_V3.0_A08_20254038_21748038_qBrCR38-2	-9.19847	1.57782e-22	-8.29292	5.91332e-11	-9.10671	4.34649e-15
BnaA08g10650D_Putative Rcr9	Brara_Chiifu_V3.0_A08_12311942_12646299_Rcr9	-8.2794	1.26935e-09	-6.28888	4.36178e-05	-8.71728	8.05948e-10
BnaA08g24250D_Unknown function (DUF1262)	Brara_Chiifu_V3.0_A08_20254038_21748038_qBrCR38-2	-7.06037	3.61672e-06	-6.36277	0.000228352	-4.34037	0.0181369
BnaC07g36860D_Putative CRb	Brara_Chiifu_V3.0_A03_25372383_25551199_CRb	-6.08111	0.000634118	-6.11059	0.000935919	-5.7948	0.0152418
BnaA03g32320D_Hsp70 protein	Brara_Chiifu_V3.0_A08_20254038_21748038_qBrCR38-2	-5.67313	7.31266e-12	-5.58503	9.01894e-13	-5.97606	4.28283e-52
BnaC07g34220D_Weak chloroplast movement under blue light	Brara_Chiifu_V3.0_A03_23823130_26806601_Rcr4	-3.9753	5.34002e-10	-3.82233	1.19884e-08	-4.29381	6.89265e-08
BnaC07g36130D_K+ Potassium transporter	Brara_Chiifu_V3.0_A03_24574673_25715499_Rcr1	-3.43379	2.07212e-19	-2.35089	0.0370752	-3.32338	1.68355e-05
BnaA08g24200D_Calcineurin-like phosphoesterase	Brara_Chiifu_V3.0_A08_20254038_21748038_qBrCR38-2	-3.42945	2.8542e-20	-3.69446	5.33957e-16	-3.77993	2.00068e-07
BnaA08g24210D_ELM2 domain	Brara_Chiifu_V3.0_A08_20254038_21748038_qBrCR38-2	-3.42374	1.56526e-21	-3.31878	8.90972e-05	-3.51738	6.15445e-10
BnaC02g47830D_Protein kinase domain	Brara_Chiifu_V3.0_A03_23823130_26806601_Rcr4	-2.78936	1.6451e-10	-1.1598	0.309598	-1.26933	0.0313384
BnaC01g11370D_HSF-type DNA binding	Brara_Chiifu_V3.0_A03_24574673_25715499_Rcr1	-2.78274	7.08864e-07	-2.35527	0.00309545	-2.42094	0.0015273
BnaC02g32310D_TIR domain	Brara_Chiifu_V3.0_A02_22502031_26348249_Rcr8	-2.77778	4.07302e-13	-2.42409	0.000646791	-2.29051	5.09331e-07
BnaA08g24160D_WRKY DNA -binding domain	Brara_Chiifu_V3.0_A08_20254038_21748038_qBrCR38-2	-2.74931	9.14215e-08	-3.38877	2.51167e-06	-2.6084	1.48767e-06
BnaA08g26300D_Cupin	Brara_Chiifu_V3.0_A08_20254038_21748038_qBrCR38-2	-2.64426	3.08636e-18	-2.67	2.50467e-08	-2.05837	8.05041e-11
BnaA08g23760D_Chlorophyll A-B binding protein	Brara_Chiifu_V3.0_A08_20254038_21748038_qBrCR38-2	-2.61464	0.00262718	-2.13962	0.0476409	-2.82611	0.00234527
BnaC07g38620D_Late embryogenesis abundant protein	Brara_Chiifu_V3.0_A03_23823130_26806601_Rcr4	-2.51365	8.33265e-06	-3.30008	1.50639e-06	-3.33492	4.94728e-08
BnaC03g34790D_U3 small nucleolar RNA-associated protein 10	Brara_Chiifu_V3.0_A03_16048432_16289350_Crr3	-2.46165	3.58682e-15	-2.52885	6.59581e-12	-2.58292	1.12826e-07
BnaA08g24130D_GCK domain	Brara_Chiifu_V3.0_A08_20254038_21748038_qBrCR38-2	-2.17205	1.6327e-09	-2.12723	0.00405876	-1.92965	0.00529872
BnaC07g35910D_VPS54-like protein	Brara_Chiifu_V3.0_A03_24574673_25715499_Rcr1	-1.96593	8.20515e-11	-2.48373	1.59454e-08	-2.03011	7.19471e-08
BnaA08g15080D_Sodium/hydrogen exchanger family	Brara_Chiifu_V3.0_A03_23823130_26806601_Rcr4	-1.92469	0.000856851	-2.07271	0.0481148	-1.26289	0.0318307
BnaC02g36280D_putative Rcr8	Brara_Chiifu_V3.0_A02_22502031_26348249_Rcr8	-1.87189	6.15298e-15	-1.74069	0.000216489	-2.36478	9.36356e-15
BnaC07g35200D_Glycosyl transferase family 4	Brara_Chiifu_V3.0_A03_23823130_26806601_Rcr4	-1.86497	1.17637e-11	-1.86394	9.00553e-09	-2.24542	3.14281e-07
BnaA08g25590D_Putative qBrCR38-2	Brara_Chiifu_V3.0_A08_20254038_21748038_qBrCR38-2	-1.69802	1.63043e-05	-1.22555	0.327827	-1.50056	0.0266451
BnaA08g24220D_Protein KTI12 homolog	Brara_Chiifu_V3.0_A08_20254038_21748038_qBrCR38-2	-1.60463	0.000109642	-2.11224	0.0252836	-2.16942	0.00144785
BnaA08g24310D_Putative qBrCR38-2	Brara_Chiifu_V3.0_A08_20254038_21748038_qBrCR38-2	-1.51491	6.16664e-05	-1.2014	0.000753902	-1.43743	0.000905239
BnaA08g09060D_S-adenosyl-L-methionine-dependent methyltransferase	Brara_Chiifu_V3.0_A08_11385371_11627069_Rcr3	-1.35495	1.89202e-07	-0.976512	0.000891269	-1.17513	0.00274047
BnaC03g63240D_Probable WRKY transcription factor 19	Brara_Chiifu_V3.0_A03_24574673_25715499_Rcr1	-1.14689	0.000138125	-1.19127	0.014702	-1.16892	0.00357807
BnaA08g23820D_Putative qBrCR38-2	Brara_Chiifu_V3.0_A08_20254038_21748038_qBrCR38-2	-1.02732	0.0044379	-1.42203	0.000973955	-1.30679	0.00565712
BnaA08g23660D_Putative qBrCR38-2	Brara_Chiifu_V3.0_A08_20254038_21748038_qBrCR38-2	-0.95639	0.0426402	-2.26543	4.79154e-06	-1.63544	0.00726112
BnaC07g37280D_Alkaline ceramidase 3	Brara_Chiifu_V3.0_A03_25523177_25752008_CRa	-0.928597	0.000204151	-0.909247	0.651484	-1.71229	0.00238147
BnaA02g04080D_NB-ARC domain	Brara_Chiifu_V3.0_A03_15986124_16046801_CRd	1.40023	4.34064e-05	1.59285	0.0811285	2.46196	6.68559e-06
BnaA08g10990D_Arginine decarboxylase 2	Brara_Chiifu_V3.0_A08_12116024_13046214_SingleGene-Brookfield	1.47035	1.01742e-07	1.66708	0.00108742	1.5958	1.77528e-05
BnaC03g43890D_PIF1-like helicase	Brara_Chiifu_V3.0_A03_24574673_25715499_Rcr1	1.73862	6.96466e-06	2.06333	7.85077e-05	1.76713	0.0021065
BnaA01g09700D_BES1/BZR1 plant transcription factor	Brara_Chiifu_V3.0_A03_24574673_25715499_Rcr1	2.18926	6.42192e-06	2.54934	0.00148633	2.20655	4.88765e-05
BnaA08g25630D_Pectinase At1g48100	Brara_Chiifu_V3.0_A08_20254038_21748038_qBrCR38-2	2.21369	0.000292913	1.56312	0.37716	2.3802	0.00487319
BnaC02g35150D_Sulfotransferase domain	Brara_Chiifu_V3.0_A02_22502031_26348249_Rcr8	2.32264	2.82662e-11	2.55392	0.00530158	2.15258	0.0179505
BnaC06g39280D_D-mannose binding lectin	Brara_Chiifu_V3.0_A07_20107291_20209491_qBrCR38-1	2.53757	1.35435e-06	2.72807	0.0356588	3.76518	0.000767368
BnaA08g10100D_NB-ARC domain	Brara_Chiifu_V3.0_A08_12116024_13046214_SingleGene-Brookfield	3.03201	2.4904e-21	2.91485	8.70264e-14	2.71202	1.59271e-09
BnaA07g38490D_Enhancer of polycomb-like	Brara_Chiifu_V3.0_A07_20107291_20209491_qBrCR38-1	5.23542	5.61854e-08	4.42559	0.00165257	4.51602	3.78811e-08
BnaC02g35140D_Sulfotransferase domain	Brara_Chiifu_V3.0_A02_22502031_26348249_Rcr8	7.27304	0.00140089	11.4621	1.56171e-17	7.56744	0.00502599
BnaA02g35050D_NB-ARC domain	Brara_Chiifu_V3.0_A03_15986124_16046801_CRd	7.83157	3.59375e-17	7.38643	1.2374e-17	6.77515	3.26484e-23
BnaA08g28590D_Putative Rcr4	Brara_Chiifu_V3.0_A03_23823130_26806601_Rcr4	8.76103	7.67902e-11	9.42221	8.58089e-12	7.21638	5.82334e-09
